# Supplementary material for: Pevonedistat Inhibits SOX2 Expression and Sphere Formation but Also Drives the Induction of Terminal Differentiation Markers and Apoptosis within Arsenite-Transformed Urothelial Cells
Source: MDPI journal article supplement (doi:10.3390/ijms24119149), 2023-05-23
Supplement: s1 [file s1]

# Figure S1. Uncropped Western blots for Figures 2, 8, and 9

**A. Uncropped blot for Fig. 2**

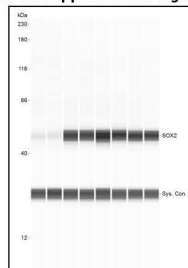

Lane 1&2: URO Par  
Lane 3&4: URO As\_I  
Lane 5&6: URO As\_II  
Lane 7&8: URO As\_III

**B. Uncropped blot for Fig. 8**

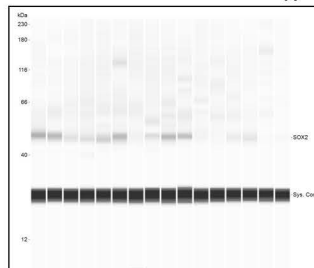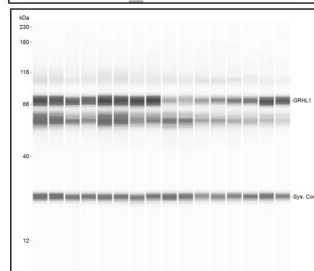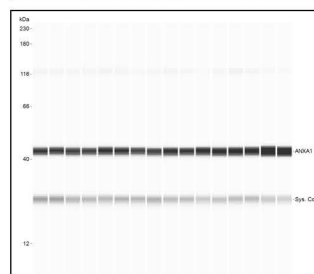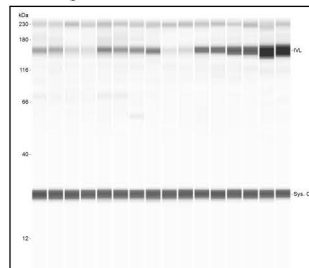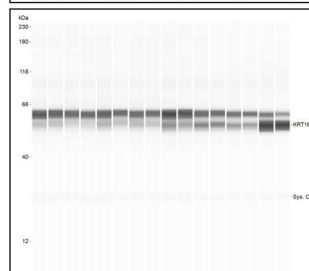

Lane 1&2: URO Par\_DMSO  
Lane 3&4: URO Par\_PVD  
Lane 5&6: URO Par\_CIS  
Lane 7&8: URO Par\_PVD+CIS  
Lane 9&10: URO As\_I\_DMSO  
Lane 11&12: URO As\_I\_PVD  
Lane 13&14: URO As\_I\_CIS  
Lane 15&16: URO As\_I\_PVD+CIS

**C. Uncropped blot for Fig. 9**

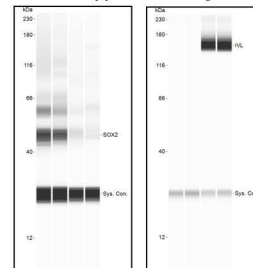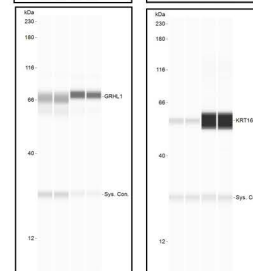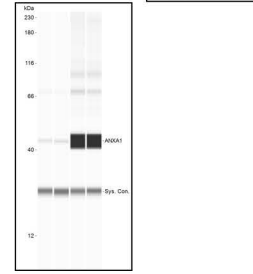

Lane 1&2: URO As\_I  
Lane 3&4: URO As\_I\_sphere

**Figure S2. Proteomic analysis of UROtsa cells after 5 passages in 1  $\mu$ M As<sup>3+</sup>**

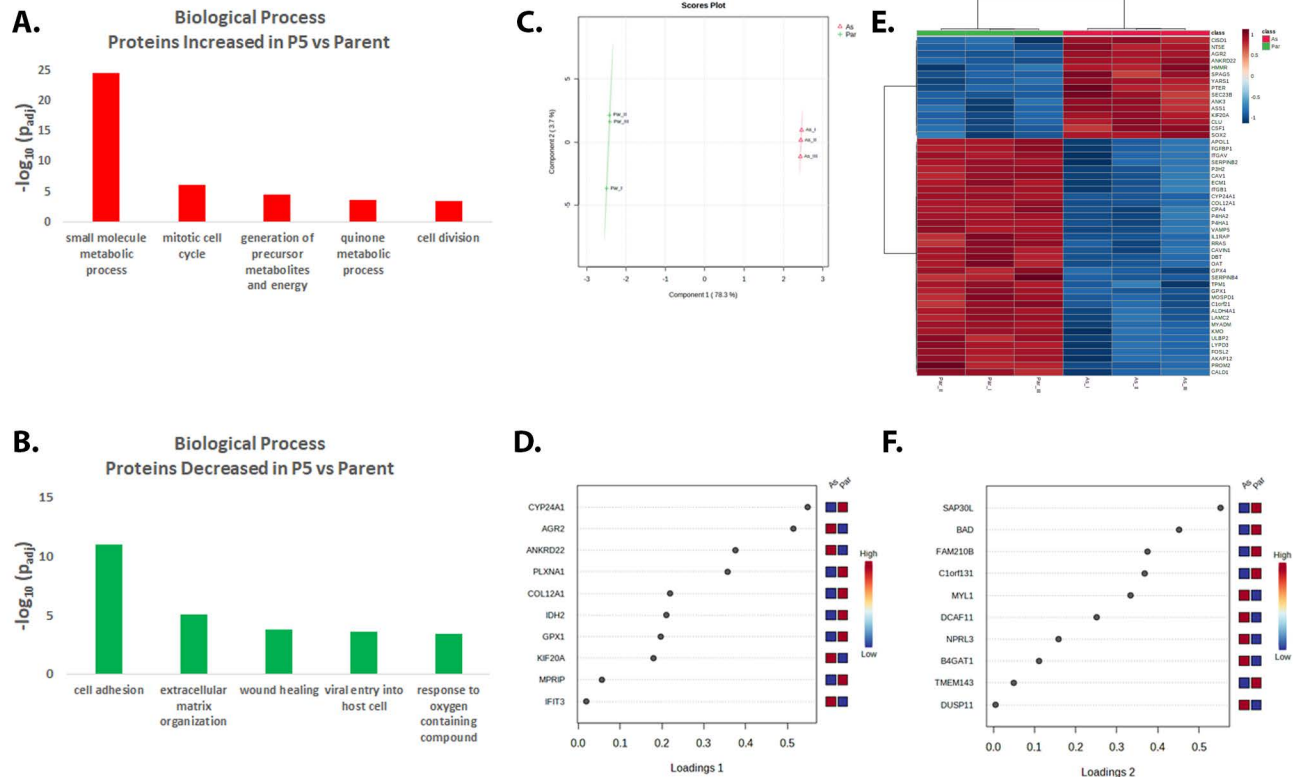

**Figure S3. Proteomic analysis of UROtsa cells after 10 passages in 1  $\mu\text{M}$   $\text{As}^{3+}$**

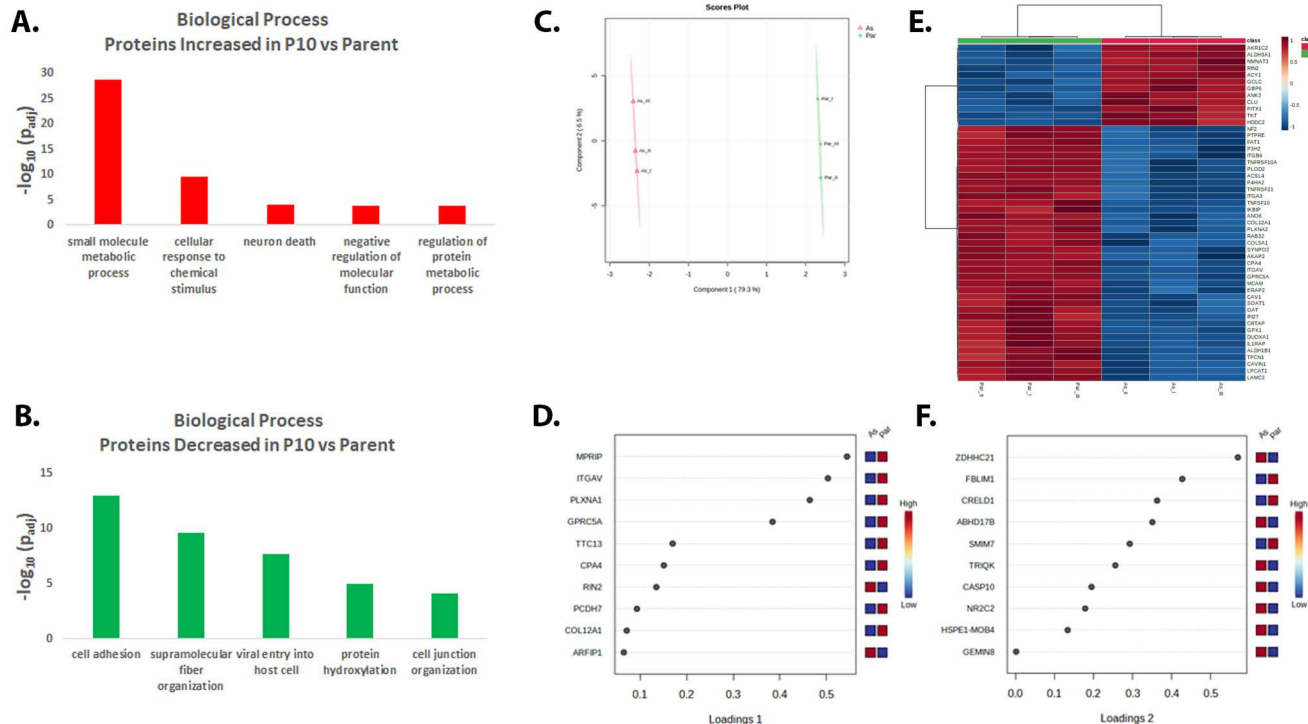

**Figure S4. Proteomic analysis of UROtsa cells after 20 passages in 1  $\mu$ M As<sup>3+</sup>**

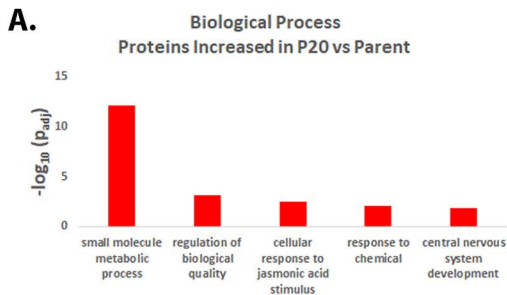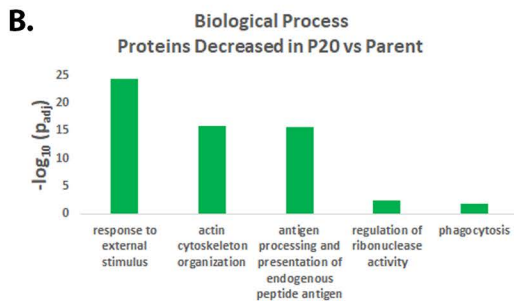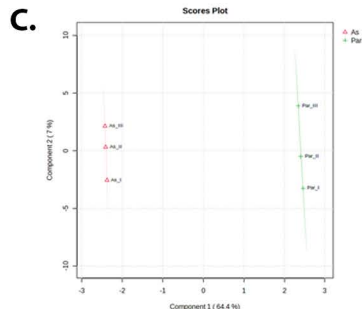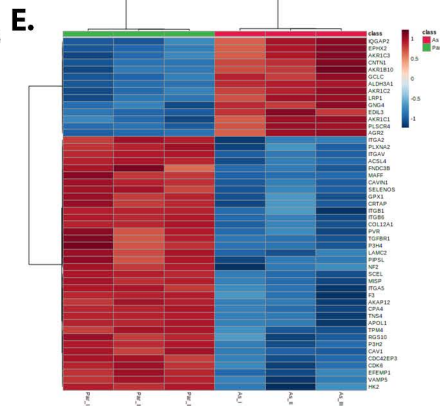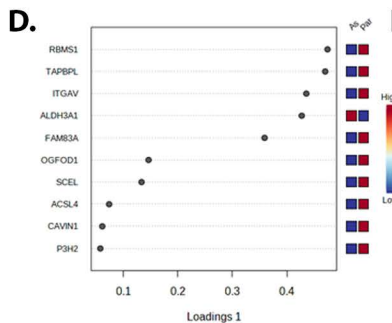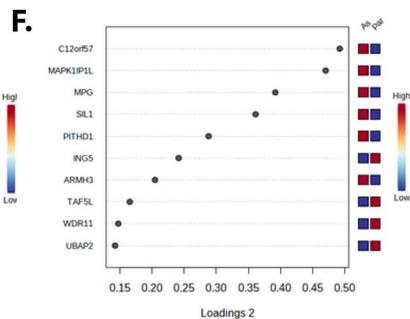

**Figure S5. Morphology of UROtsa As\_I cells after PVD treatments- 40X magnification**

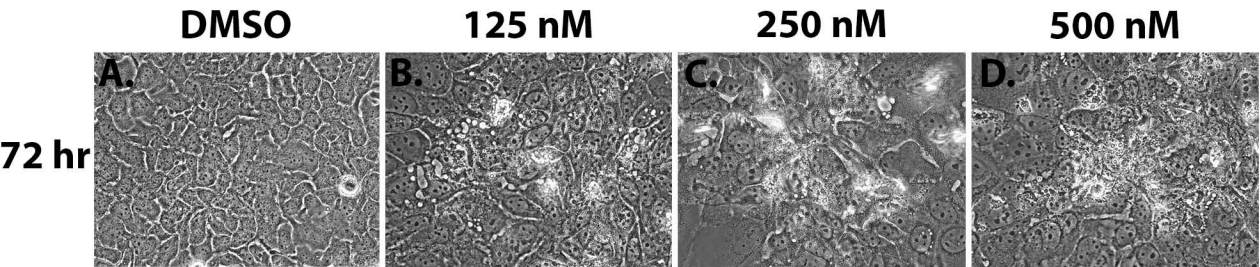

**Figure S6. Morphology of UROtsa As\_I cells during recovery from PVD treatments**

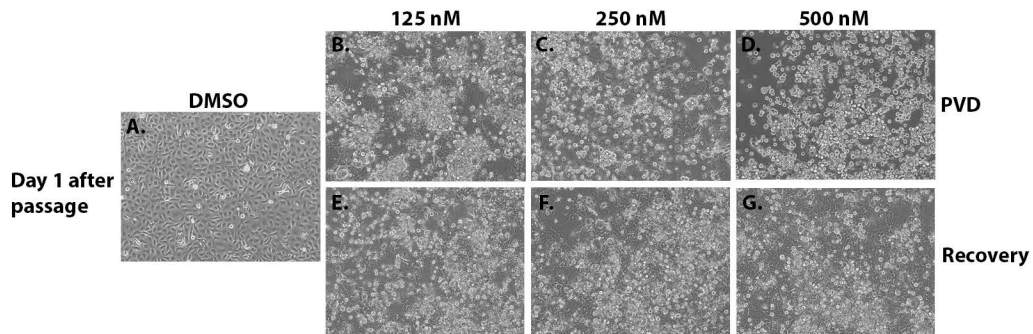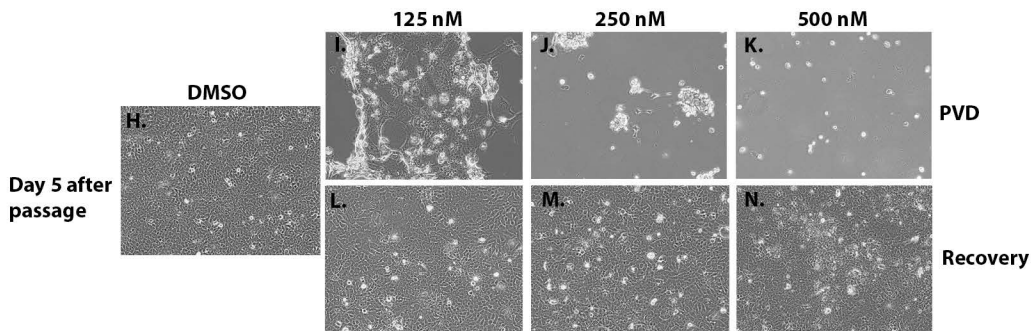

**Figure S7. Morphology of UROtsa parent and As\_I cells treated with PVD for 72 hours**

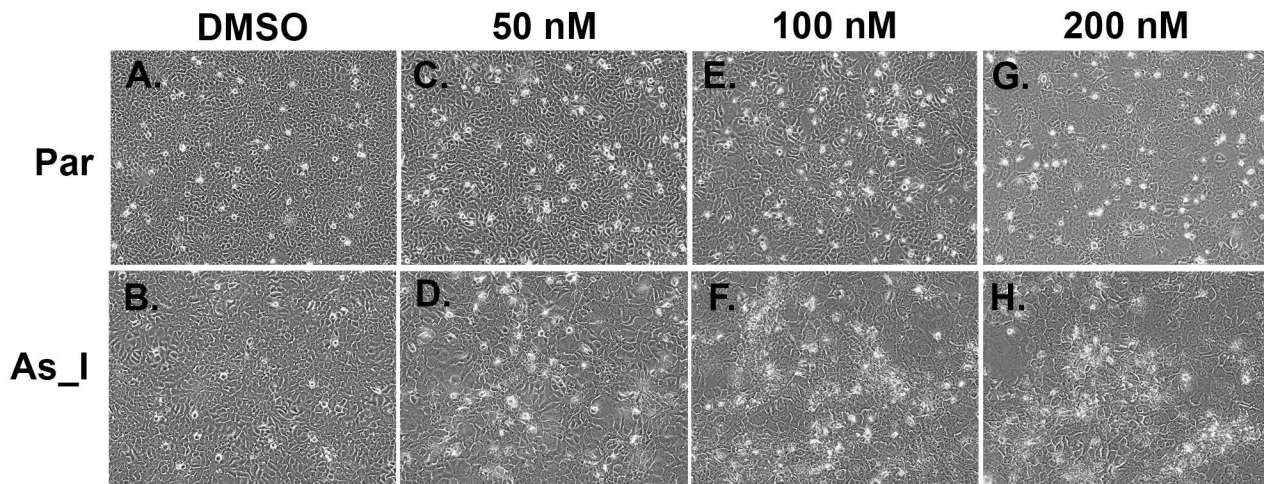

**Figure S8. Viability of UROtsa parent and As\_I cells treated with CIS for 72 hours**

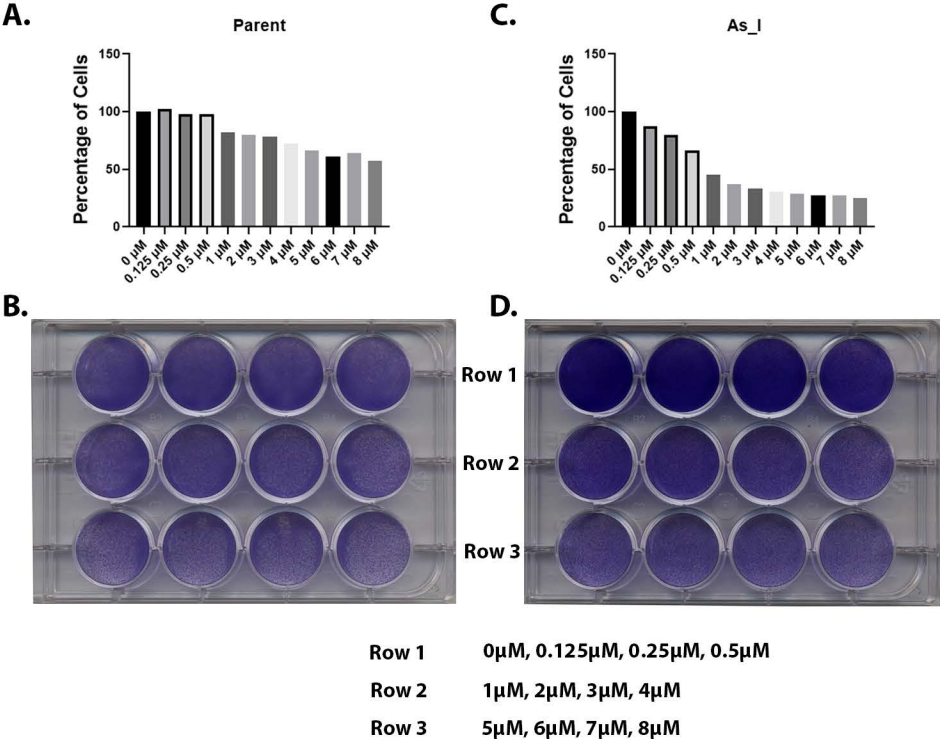



**Figure S9. Morphology of UROtsa As\_I cells after PVD and CIS treatment-20X magnification**

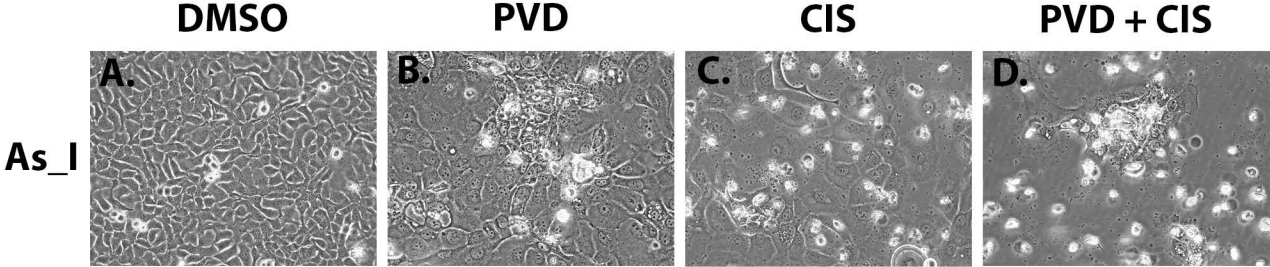

**Figure S10. Additional gene expression from UROtsa parent and As\_I cells treated with PVD, CIS, and PVD+CIS**

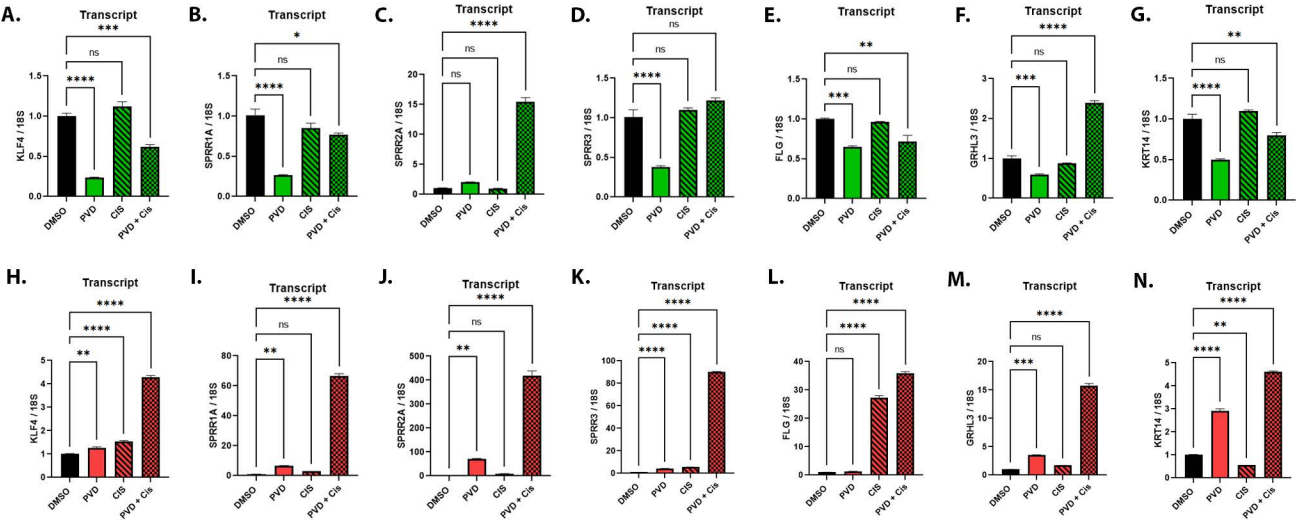

**Figure S11. Additional gene expression from urospheres derived from UROtsa As\_I cells**

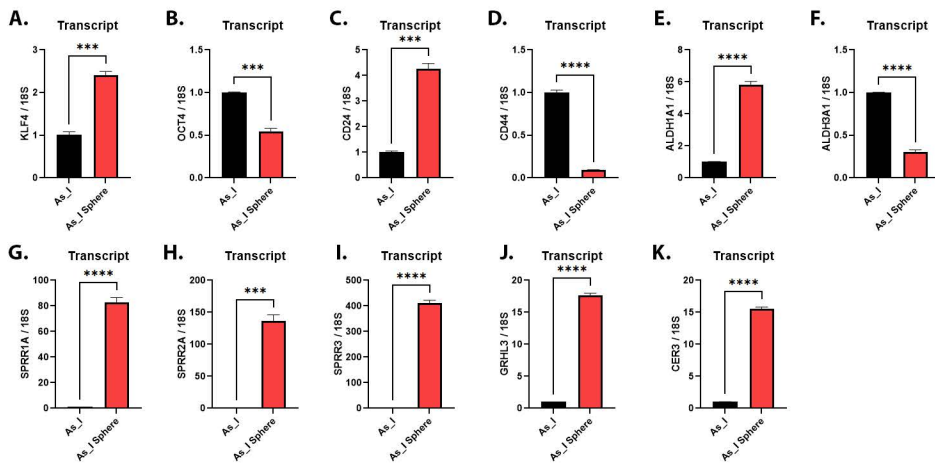

**Table S1. List of primers used in the study**

| Genes   | Product                | Catalog No./unique Assay ID | Source                      |
|---------|------------------------|-----------------------------|-----------------------------|
| SOX2    | PrimeTime qPCR primers | Hs.PT.58.237897.g           | Integrated DNA Technologies |
| KLF4    | PrimeTime qPCR primers | Hs.PT.58.45542593           | Integrated DNA Technologies |
| IVL     | PrimeTime qPCR primers | Hs.PT.58.39460547           | Integrated DNA Technologies |
| KRT6A   | PrimeTime qPCR primers | Hs.PT.58.26132549.g         | Integrated DNA Technologies |
| GRHL1   | PrimeTime qPCR primers | Hs.PT.58.4216223            | Integrated DNA Technologies |
| SPRR3   | PrimeTime qPCR primers | Hs.PT.58.25686932.g         | Integrated DNA Technologies |
| DSC2    | PrimeTime qPCR primers | Hs.PT.58.931954             | Integrated DNA Technologies |
| CDH1    | PrimeTime qPCR primers | Hs.PT.58.3324071            | Integrated DNA Technologies |
| KRT16   | PrimeTime qPCR primers | Hs.PT.58.40837518.g         | Integrated DNA Technologies |
| ANXA1   | PrimeTime qPCR primers | Hs.PT.56a.27417050          | Integrated DNA Technologies |
| SPRR1A  | PrimeTime qPCR primers | Hs.PT.58.39085888.g         | Integrated DNA Technologies |
| SPRR2A  | PrimeTime qPCR primers | Hs.PT.58.19341995           | Integrated DNA Technologies |
| FLG     | PrimeTime qPCR primers | Hs.PT.58.24292320.g         | Integrated DNA Technologies |
| GRHL3   | PrimeTime qPCR primers | Hs.PT.58.2379919            | Integrated DNA Technologies |
| KRT14   | PrimeTime qPCR primers | Hs.PT.58.4592110            | Integrated DNA Technologies |
| OCT4    | PrimeTime qPCR primers | Hs.PT.58.14494169.g         | Integrated DNA Technologies |
| CD24    | PrimeTime qPCR primers | Hs.PT.58.45758278.g         | Integrated DNA Technologies |
| CD44    | PrimeTime qPCR primers | Hs.PT.58.2004193            | Integrated DNA Technologies |
| ALDH1A1 | PrimeTime qPCR primers | Hs.PT.56a.38450309          | Integrated DNA Technologies |
| ALDH3A1 | PrimeTime qPCR primers | Hs.PT.56a.24823646.g        | Integrated DNA Technologies |
| CERS3   | PrimeTime qPCR primers | Hs.PT.58.14560148           | Integrated DNA Technologies |

\*18S rRNA primers were custom ordered from IDT- Upper: CGCCGCTAGAGGTGAAATTC

Lower: TTGGCAAATGCTTTCGCTC

**Table S2. Antibodies used for Western analysis**

| Antigen | Source                    | Cat. No     | Protein lysate conc.<br>( $\mu\text{g}/\mu\text{L}$ ) | Dilution |
|---------|---------------------------|-------------|-------------------------------------------------------|----------|
| SOX2    | Cell Signaling Technology | 14962       | 1.0                                                   | 1:100    |
| IVL     | Novus Biologicals         | NBP2-33742  | 0.5                                                   | 1:50     |
| GRHL1   | Novus Biologicals         | NBP 1-81321 | 0.5                                                   | 1:200    |
| KRT16   | Abcam                     | ab76416     | 0.5                                                   | 1:100    |
| ANXA1   | Cell Signaling Technology | 32934       | 0.03                                                  | 1:100    |

**Table S3. Antibodies used for Immunohistochemical analysis**

| Antigen | Source                    | Cat. No     | Dilution |
|---------|---------------------------|-------------|----------|
| SOX2    | Cell Signaling Technology | 14962       | 1:100    |
| IVL     | Novus Biologicals         | NBP2-33742  | 1:500    |
| GRHL1   | Novus Biologicals         | NBP 1-81321 | 1:300    |

## Supporting information legends

**Figure S1. Uncropped Western blots for Figures 2, 8, and 9.** (A) Displays uncropped Western blot image used in Figure 2. (B) Displays uncropped Western blot images used in Figure 8. (C) Displays uncropped Western blot images used in Figure 9.

**Figure S2. Proteomic analysis of UROtsa cells after 5 passages in 1  $\mu\text{M}$   $\text{As}^{3+}$ .** (A) The top five biological process pathways upregulated in UROtsa cells exposed to 1  $\mu\text{M}$   $\text{As}^{3+}$  for 5 passages. (B) The top five biological process pathways downregulated in UROtsa cells exposed to 1  $\mu\text{M}$   $\text{As}^{3+}$  for 5 passages. (C) Principle component analysis (PCA) of proteomic data comparing variability between the parent (Par\_I, Par\_II, Par\_III) and  $\text{As}^{3+}$ -exposed (As\_I, As\_II, As\_III) UROtsa cells at passage 5 during  $\text{As}^{3+}$ -transformation. (D) Loadings plot of proteomic data showing the main proteins responsible for driving the variability in component 1 between the parent and  $\text{As}^{3+}$ -exposed cells at passage 5. (E) Heatmap displaying the top 50 differentially expressed proteins (DEPs) between the parent and  $\text{As}^{3+}$ -exposed UROtsa cells having greater than 1.5-fold change and  $p < 0.05$ . (F) Loadings plot of proteomic data showing the main proteins responsible for driving the variability in component 2 between the parent and  $\text{As}^{3+}$ -exposed cells at passage 5.

**Figure S3. Proteomic analysis of UROtsa cells after 10 passages in 1  $\mu\text{M}$   $\text{As}^{3+}$ .** (A) The top five biological process pathways upregulated in UROtsa cells exposed to 1  $\mu\text{M}$   $\text{As}^{3+}$  for 10 passages. (B) The top five biological process pathways downregulated in UROtsa cells exposed to 1  $\mu\text{M}$   $\text{As}^{3+}$  for 10 passages. (C) Principle component analysis (PCA) of proteomic data comparing variability between the parent (Par\_I, Par\_II, Par\_III) and  $\text{As}^{3+}$ -exposed (As\_I, As\_II, As\_III) UROtsa cells at passage 10 during  $\text{As}^{3+}$ -transformation. (D) Loadings plot of proteomic

data showing the main proteins responsible for driving the variability in component 1 between the parent and As<sup>3+</sup>-exposed cells at passage 10. (E) Heatmap displaying the top 50 differentially expressed proteins (DEPs) between the parent and As<sup>3+</sup>-exposed UROtsa cells having greater than 1.5-fold change and  $p < 0.05$ . (F) Loadings plot of proteomic data showing the main proteins responsible for driving the variability in component 2 between the parent and As<sup>3+</sup>-exposed cells at passage 10.

**Figure S4. Proteomic analysis of UROtsa cells after 20 passages in 1  $\mu\text{M}$  As<sup>3+</sup>.** (A) The top five biological process pathways upregulated in UROtsa cells exposed to 1  $\mu\text{M}$  As<sup>3+</sup> for 20 passages. (B) The top five biological process pathways downregulated in UROtsa cells exposed to 1  $\mu\text{M}$  As<sup>3+</sup> for 20 passages. (C) Principle component analysis (PCA) of proteomic data comparing variability between the parent (Par\_I, Par\_II, Par\_III) and As<sup>3+</sup>-exposed (As\_I, As\_II, As\_III) UROtsa cells at passage 20 during As<sup>3+</sup>-transformation. (D) Loadings plot of proteomic data showing the main proteins responsible for driving the variability in component 1 between the parent and As<sup>3+</sup>-exposed cells at passage 20. (E) Heatmap displaying the top 50 differentially expressed proteins (DEPs) between the parent and As<sup>3+</sup>-exposed UROtsa cells having greater than 1.5-fold change and  $p < 0.05$ . (F) Loadings plot of proteomic data showing the main proteins responsible for driving the variability in component 2 between the parent and As<sup>3+</sup>-exposed cells at passage 20.

**Figure S5. Morphology of UROtsa As\_I cells after PVD treatments- 40X magnification.** (A-D) Brightfield microscope images of As\_I cells taken at 40X magnification. (A) DMSO control at 72 hours. (B) 125 nM PVD at 72 hours. (C) 250 nM PVD at 72 hours. (D) 500 nM PVD at 72 hours. Forty-eight hours prior to treatments, 100,000 cells were seeded per well of a 12-well plate and allowed to grow. The cells were then treated for 72 hours.

**Figure S6. Morphology of UROtsa As\_I cells during recovery from PVD treatments. (A-G)**

Brightfield images on first day after passaging UROtsa As\_I cells that had previously been exposed to DMSO or various concentrations of PVD for 72 hours. The cells were either passaged into media containing various concentrations of PVD (PVD group) or passaged into regular media (recovery group). (H-N) Brightfield images of UROtsa As\_I cells (described above) on day 5. The cells were fed fresh media only (recovery group) or fed fresh media containing various concentrations of PVD (PVD group) on day 3. All photos were taken at 10X magnification.

**Figure S7. Morphology of UROtsa parent and As\_I cells treated with PVD for 72 hours.**

Brightfield microscope images of UROtsa parent and As\_I cells taken at 10X magnification. (A) parent DMSO, (B) As\_I DMSO, (C) parent 50 nM PVD, (D) As\_I 50 nM PVD, (E) parent 100 nM PVD, (F) As\_I 100 nM PVD, (G) parent 200 nM PVD, (H) As\_I 200 nM PVD. Forty-eight hours prior to treatments, 100,000 cells were seeded per well of a 12-well plate and allowed to grow. The cells were then treated for 72 hours.

**Figure S8. Viability of UROtsa parent and As\_I cells treated with CIS for 72 hours.** Parent

(A,B) or As\_I (C,D) UROtsa cells were treated with various concentrations of CIS and were stained with crystal violet after 72 hours. Forty-eight hours prior to treatments, 100,000 cells were seeded per well of a 12-well plate and allowed to grow. The cells were then treated for 72 hours.

**Figure S9. Morphology of UROtsa As\_I cells after PVD and CIS treatment- 20X**

**magnification.** (A-D) Brightfield microscope images of As\_I cells taken at 20X magnification.

(A) DMSO, (B) 50 nM PVD, (C) 1  $\mu$ M CIS, (D) 50 nM PVD + 1  $\mu$ M CIS. Forty-eight hours

prior to treatments, 300,000 cells were seeded per well of a 6-well plate and allowed to grow. The cells were then treated for 72 hours.

**Figure S10. Additional gene expression from UROtsa parent and As\_I cells treated with PVD, CIS, and PVD+CIS.** Cells were treated for 72 hours with DMSO, 50 nM PVD, 1  $\mu$ M CIS, or 50 nM PVD + 1  $\mu$ M CIS treatments in parent (green bar graphs) and As\_I UROtsa (red bar graphs) cells. Parent transcript levels for (A) KLF4, (B) SPRR1A, (C) SPRR2A, (D) SPRR3, (E) FLG, (F) GRHL3, (G) KRT14. As\_I transcript levels for (H) KLF4, (I) SPRR1A, (J) SPRR2A, (K) SPRR3, (L) FLG, (M) GRHL3, (N) KRT14. All data is plotted as fold-change compared to the DMSO control. Gene expression was normalized to the 18S housekeeping gene. The gene measurements were performed in triplicates and the values reported are mean  $\pm$  SEM. An ordinary one-way ANOVA was performed followed by a Dunnett's post-hoc test. Asterisks indicate significant differences from the DMSO control ( $p < 0.05$ ).

**Figure S11. Additional gene expression from urospheres derived from UROtsa As\_I cells.**

As\_I cells were grown as monolayer in regular T-75 flasks (As\_I, black bars) or ultra-low attachment T-75 flasks (As\_I spheres, red bars) in serum free media. The transcript level for (A) KLF4, (B) OCT4, (C) CD24, (D) CD44, (E) ALDH1A1, (F) ALDH3A1, (G) SPRR1A, (H) SPRR2A, (I) SPRR3, (J) GRHL3, and (K) CERS3 in As\_I cells and As\_I spheres. All data is plotted as fold-change compared to the As\_I cells. Gene expression was normalized to the 18S housekeeping gene. The gene measurements were performed in triplicates and the values reported are mean  $\pm$  SEM. A t-test was performed to determine significance. Asterisks indicate significant differences between the As\_I cells and As\_I spheres ( $p < 0.05$ ).

**Table S1. List of primers used in the study**

**Table S2. Antibodies used for Western analysis**



**Table S3. Antibodies used for Immunohistochemical analysis**
