# Supplementary material for: Pevonedistat Inhibits SOX2 Expression and Sphere Formation but Also Drives the Induction of Terminal Differentiation Markers and Apoptosis within Arsenite-Transformed Urothelial Cells
Source: Int J Mol Sci. 2023 May 23;24(11):9149. doi: 10.3390/ijms24119149 (PMC10252886; doi:10.3390/ijms24119149)
Supplement: Supplementary file 1 [file ijms-24-09149-s001.zip › Table S4.xlsx]

## Sheet: Protein Results
Table S4. Proteomics Data
Protein Annotation							Log2 Cyclic Loess Normalized Exclusive MS1 Intensities															As_P5_vs_parent								As_P10_vs_parent								As_P20_vs_parent								As_P40_vs_parent
id	Fasta headers	Majority protein IDs	Score	UniProt ID	Gene Name	Description	Parent_1	As3_P5_1	As3_P10_1	As3_P20_1	As3_P40_1	Parent_2	As3_P5_2	As3_P10_2	As3_P20_2	As3_P40_2	Parent_3	As3_P5_3	As3_P10_3	As3_P20_3	As3_P40_3	logFC	CI.L	CI.R	AveExpr	t	B	P.Value	adj.P.Val	logFC	CI.L	CI.R	AveExpr	t	B	P.Value	adj.P.Val	logFC	CI.L	CI.R	AveExpr	t	B	P.Value	adj.P.Val	logFC	CI.L	CI.R	AveExpr
614	tr|K7EIP0|K7EIP0_HUMAN Tartrate-resistant acid phosphatase type 5 (Fragment) OS=Homo sapiens OX=9606 GN=ACP5 PE=1 SV=1;tr|A0A3B3IS75|A0A3B3IS75_HUMAN Tartrate-resistant acid phosphatase type 5 (Fragment) OS=Homo sapiens OX=9606 GN=ACP5 PE=1 SV=1;tr|K7ESF2|	K7EIP0;A0A3B3IS75;K7ESF2;K7EJD9;P13686	3.1297	K7EIP0	ACP5	Tartrate-resistant acid phosphatase type 5 (Fragment)	12.2559	NA	12.0345	12.5332	NA	12.0793	NA	12.8474	11.9804	NA	NA	NA	NA	13.1919	11.3574	NA	NA	NA	12.285	NA	NA	NA	NA	0.273305	-0.623363	1.16997	12.285	0.709246	-6.36961	0.499329	0.616129	0.400898	-0.417644	1.21944	12.285	1.13966	-6.13671	0.289041	0.477265	-0.810236	-1.90843	0.287953	12.285
2009	tr|H7C347|H7C347_HUMAN Probable protein phosphatase 1N (Fragment) OS=Homo sapiens OX=9606 GN=PPM1N PE=4 SV=1;sp|Q8N819|PPM1N_HUMAN Probable protein phosphatase 1N OS=Homo sapiens OX=9606 GN=PPM1N PE=2 SV=2	H7C347;Q8N819	1.7357	H7C347	PPM1N	Probable protein phosphatase 1N (Fragment)	12.9712	13.9366	13.8099	13.67	15.5523	12.5371	18.2599	13.3197	14.4716	13.777	NA	12.5093	13.1931	NA	12.7559	2.14779	-0.987876	5.28345	13.9049	1.53463	-5.58194	0.157117	0.241304	0.686739	-2.44892	3.8224	13.9049	0.490686	-6.60076	0.634659	0.733323	1.31664	-2.11831	4.75158	13.9049	0.858792	-6.3299	0.411366	0.592079	1.27426	-1.8614	4.40993	13.9049
37	tr|A0A087WTA8|A0A087WTA8_HUMAN Collagen alpha-2(I) chain OS=Homo sapiens OX=9606 GN=COL1A2 PE=1 SV=1;sp|P08123|CO1A2_HUMAN Collagen alpha-2(I) chain OS=Homo sapiens OX=9606 GN=COL1A2 PE=1 SV=7	A0A087WTA8;P08123	4.7913	A0A087WTA8	COL1A2	Collagen alpha-2(I) chain	15.7081	16.0334	19.256	15.9429	19.0685	16.7362	20.2821	21.7807	12.4948	18.1599	14.1839	16.1913	14.1321	13.7064	14.3839	1.95954	-2.26722	6.18629	16.5373	1.0158	-6.30578	0.33076	0.430596	2.84685	-1.3799	7.07361	16.5373	1.47577	-5.76967	0.167032	0.277312	-1.49471	-5.72146	2.73205	16.5373	-0.774836	-6.60162	0.454178	0.627871	1.66138	-2.56538	5.88813	16.5373
1104	tr|H7C3Z9|H7C3Z9_HUMAN Anterior gradient protein 2 homolog (Fragment) OS=Homo sapiens OX=9606 GN=AGR2 PE=1 SV=1;tr|H7C040|H7C040_HUMAN Anterior gradient protein 3 (Fragment) OS=Homo sapiens OX=9606 GN=AGR3 PE=1 SV=1;tr|B5MC62|B5MC62_HUMAN Anterior gradient	H7C3Z9;H7C040;B5MC62;B5MC07;Q8TD06;O95994	3.9321	H7C3Z9	AGR2	Anterior gradient protein 2 homolog (Fragment)	15.0887	17.0537	15.9842	16.3936	15.6467	15.1221	17.0001	16.019	16.6611	16.0321	15.169	17.0159	16.1373	16.7008	17.1398	1.89662	1.34909	2.44415	16.2109	7.44962	4.7026	3.68675e-06	0.000284414	0.92023	0.372699	1.46776	16.2109	3.61452	-2.00319	0.00293677	0.0162758	1.45856	0.911034	2.0061	16.2109	5.72902	1.87943	5.82196e-05	0.00123955	1.14626	0.598732	1.69379	16.2109
866	tr|A0A7I2YQN2|A0A7I2YQN2_HUMAN Heterogeneous nuclear ribonucleoprotein Q OS=Homo sapiens OX=9606 GN=SYNCRIP PE=1 SV=1;tr|A0A7I2V346|A0A7I2V346_HUMAN Heterogeneous nuclear ribonucleoprotein Q OS=Homo sapiens OX=9606 GN=SYNCRIP PE=1 SV=1;tr|B7Z645|B7Z645_HUM	A0A7I2YQN2;A0A7I2V346;B7Z645;A0A7I2YQV8	2.4263	A0A7I2YQN2	SYNCRIP	Heterogeneous nuclear ribonucleoprotein Q	18.2352	19.6411	18.2809	16.8292	18.9364	16.4267	18.2895	18.4963	17.9702	19.7175	17.2146	19.4203	18.5592	20.1181	20.4207	1.82484	0.302208	3.34747	18.5704	2.59451	-3.9632	0.0225332	0.0578645	1.1533	-0.369329	2.67593	18.5704	1.63973	-5.5411	0.125503	0.224082	1.01368	-0.508947	2.53631	18.5704	1.44123	-5.8898	0.173643	0.338849	2.39941	0.876777	3.92203	18.5704
289	tr|A0A0A6YYL2|A0A0A6YYL2_HUMAN Sulfotransferase OS=Homo sapiens OX=9606 GN=SULT1A4 PE=1 SV=1;sp|P0DMN0|ST1A4_HUMAN Sulfotransferase 1A4 OS=Homo sapiens OX=9606 GN=SULT1A4 PE=1 SV=1;sp|P0DMM9|ST1A3_HUMAN Sulfotransferase 1A3 OS=Homo sapiens OX=9606 GN=SULT1	A0A0A6YYL2;P0DMN0;P0DMM9;H3BPL6	32.105	A0A0A6YYL2	SULT1A4	Sulfotransferase	16.562	18.4011	17.7407	16.9669	16.264	16.2011	18.177	17.5767	16.748	16.1189	16.6109	17.9553	17.3786	16.422	16.9685	1.71978	1.27411	2.16545	17.0728	8.29889	5.91765	1.08808e-06	0.000138534	1.10732	0.661649	1.55299	17.0728	5.34344	1.24903	0.000114249	0.0021332	0.254303	-0.19137	0.699975	17.0728	1.22715	-6.15783	0.240576	0.422484	-0.00750728	-0.45318	0.438166	17.0728
1072	sp|P52895|AK1C2_HUMAN Aldo-keto reductase family 1 member C2 OS=Homo sapiens OX=9606 GN=AKR1C2 PE=1 SV=3;tr|B4DK69|B4DK69_HUMAN Aldo-keto reductase family 1 member C2 OS=Homo sapiens OX=9606 GN=AKR1C2 PE=1 SV=1;tr|S4R3P0|S4R3P0_HUMAN Aldo-keto reductase fa	P52895;B4DK69;S4R3P0	52.895	P52895	AKR1C2	Aldo-keto reductase family 1 member C2	21.9657	24.0382	24.493	24.2445	22.7373	22.1655	23.8503	24.5724	24.3953	22.6498	22.3454	23.6622	24.6633	24.5704	23.9133	1.69136	1.15828	2.22444	23.6178	6.82346	3.74314	9.60903e-06	0.000514043	2.41735	1.88427	2.95043	23.6178	9.75232	7.78604	1.62909e-07	3.36527e-05	2.24453	1.71144	2.77761	23.6178	9.0551	6.91029	3.93929e-07	4.85432e-05	0.941275	0.408193	1.47436	23.6178
964	tr|H3BMN5|H3BMN5_HUMAN Calretinin (Fragment) OS=Homo sapiens OX=9606 GN=CALB2 PE=1 SV=2;tr|A6NER6|A6NER6_HUMAN Calretinin OS=Homo sapiens OX=9606 GN=CALB2 PE=1 SV=1;tr|H3BN14|H3BN14_HUMAN Calretinin (Fragment) OS=Homo sapiens OX=9606 GN=CALB2 PE=1 SV=2;sp|	H3BMN5;A6NER6;H3BN14;P22676	1.9354	H3BMN5	CALB2	Calretinin (Fragment)	15.6217	17.4075	16.9391	16.5689	14.1615	15.5965	16.9305	16.8649	16.0786	14.0307	15.4591	16.9495	16.6767	16.4483	14.9774	1.53678	1.08458	1.98897	16.0474	7.3088	4.49165	4.55279e-06	0.000305085	1.26784	0.815648	1.72004	16.0474	6.02978	2.44391	3.49056e-05	0.000953836	0.806175	0.353978	1.25837	16.0474	3.83411	-1.64215	0.00191379	0.0141009	-1.16919	-1.62138	-0.716988	16.0474
2764	sp|P00966|ASSY_HUMAN Argininosuccinate synthase OS=Homo sapiens OX=9606 GN=ASS1 PE=1 SV=2;tr|Q5T6L6|Q5T6L6_HUMAN Citrulline--aspartate ligase (Fragment) OS=Homo sapiens OX=9606 GN=ASS1 PE=1 SV=1	P00966;Q5T6L6	10.815	P00966	ASS1	Argininosuccinate synthase	18.8209	20.5374	20.2942	20.5056	19.9345	19.0375	20.5137	20.0998	20.67	19.7078	18.9806	20.365	20.0102	19.9197	20.8538	1.5257	1.00853	2.04288	20.0167	6.34446	2.97124	2.07151e-05	0.000754083	1.18841	0.67123	1.70558	20.0167	4.94184	0.520292	0.00023555	0.00327708	1.41879	0.901618	1.93597	20.0167	5.89988	2.17546	4.3469e-05	0.00103508	1.21903	0.701853	1.73621	20.0167
5245	sp|Q96DG6|CMBL_HUMAN Carboxymethylenebutenolidase homolog OS=Homo sapiens OX=9606 GN=CMBL PE=1 SV=1	Q96DG6	2.4224	Q96DG6	CMBL	Carboxymethylenebutenolidase homolog	17.1151	18.8549	18.3638	17.5619	16.6513	16.9808	18.3951	18.2106	17.4442	16.5746	17.1733	18.4066	17.9257	17.2016	17.1133	1.46247	1.11235	1.81258	17.5982	8.98333	6.8289	4.32641e-07	8.18362e-05	1.07697	0.726859	1.42709	17.5982	6.61541	3.41013	1.33632e-05	0.000523473	0.312854	-0.037262	0.662969	17.5982	1.92173	-5.18196	0.0758346	0.194584	-0.310008	-0.660124	0.0401071	17.5982
3078	sp|P21589|5NTD_HUMAN 5-nucleotidase OS=Homo sapiens OX=9606 GN=NT5E PE=1 SV=1;tr|Q96B60|Q96B60_HUMAN Ecto-5-nucleotidase OS=Homo sapiens OX=9606 GN=NT5E PE=1 SV=1	P21589;Q96B60	60.012	P21589	NT5E	5-nucleotidase	20.2981	21.7606	20.9475	20.15	20.5845	20.2739	21.622	21.0972	19.584	20.3961	20.2044	21.6701	20.7088	19.6366	19.7045	1.42547	1.00937	1.84158	20.5759	7.36743	4.57981	4.16863e-06	0.00029735	0.659061	0.242953	1.07517	20.5759	3.40629	-2.40618	0.00441684	0.0214019	-0.468574	-0.884682	-0.0524656	20.5759	-2.42178	-4.32937	0.0300542	0.100804	-0.0303926	-0.446501	0.385716	20.5759
3485	sp|P51857|AK1D1_HUMAN Aldo-keto reductase family 1 member D1 OS=Homo sapiens OX=9606 GN=AKR1D1 PE=1 SV=1	P51857	3.076	P51857	AKR1D1	Aldo-keto reductase family 1 member D1	15.6952	17.4101	18.3834	18.5235	17.1703	16.3655	17.1193	18.451	18.6735	17.2257	15.5036	17.2107	18.4166	18.7959	18.2047	1.39195	0.866511	1.91739	17.5433	5.69724	1.87555	6.14978e-05	0.00140641	2.56225	2.03682	3.08769	17.5433	10.4873	8.64009	6.75821e-08	2.33993e-05	2.80953	2.28409	3.33497	17.5433	11.4994	9.75344	2.17349e-08	8.13907e-06	1.67883	1.15339	2.20427	17.5433
253	tr|A0A0A0MSS8|A0A0A0MSS8_HUMAN Aldo-keto reductase family 1 member C3 OS=Homo sapiens OX=9606 GN=AKR1C3 PE=1 SV=1;sp|P42330|AK1C3_HUMAN Aldo-keto reductase family 1 member C3 OS=Homo sapiens OX=9606 GN=AKR1C3 PE=1 SV=4;tr|S4R3Z2|S4R3Z2_HUMAN Aldo-keto redu	A0A0A0MSS8;P42330;S4R3Z2;P17516;A6NHU4	11.455	A0A0A0MSS8	AKR1C3	Aldo-keto reductase family 1 member C3	15.7553	17.5602	17.5598	17.2654	16.1408	15.9129	17.1059	17.7204	17.496	15.9883	16.0611	17.207	17.3945	17.6218	16.7716	1.38126	0.991143	1.77137	16.9041	7.61455	4.94619	2.88875e-06	0.00024851	1.64849	1.25838	2.03861	16.9041	9.08776	6.96264	3.77549e-07	5.46331e-05	1.55127	1.16115	1.94139	16.9041	8.55178	6.24325	7.69168e-07	7.27664e-05	0.390463	0.000346832	0.780579	16.9041
3734	tr|X6R8F3|X6R8F3_HUMAN Neutrophil gelatinase-associated lipocalin OS=Homo sapiens OX=9606 GN=LCN2 PE=1 SV=1;sp|P80188|NGAL_HUMAN Neutrophil gelatinase-associated lipocalin OS=Homo sapiens OX=9606 GN=LCN2 PE=1 SV=2	X6R8F3;P80188	19.468	X6R8F3	LCN2	Neutrophil gelatinase-associated lipocalin	20.683	21.9059	20.4418	20.7684	19.5124	20.818	22.165	20.5618	20.613	19.1927	20.7107	22.1759	19.8147	20.0322	18.9937	1.34502	0.902336	1.7877	20.5593	6.53428	3.28111	1.52214e-05	0.00065533	-0.464479	-0.907164	-0.0217953	20.5593	-2.2565	-4.54935	0.0410589	0.0997019	-0.266048	-0.708732	0.176636	20.5593	-1.2925	-6.07954	0.217704	0.395407	-1.50432	-1.947	-1.06163	20.5593
586	tr|A0A2U3TZH3|A0A2U3TZH3_HUMAN Elongation factor 1-alpha OS=Homo sapiens OX=9606 GN=EEF1A2 PE=1 SV=1;sp|Q05639|EF1A2_HUMAN Elongation factor 1-alpha 2 OS=Homo sapiens OX=9606 GN=EEF1A2 PE=1 SV=1	A0A2U3TZH3;Q05639	4.6273	A0A2U3TZH3	EEF1A2	Elongation factor 1-alpha	9.55942	10.9064	11.8393	11.4568	10.3079	8.84645	10.3855	11.9056	11.4124	10.1767	10.4055	11.4863	12.0518	12.3065	14.5487	1.32228	-0.67567	3.32023	11.173	1.44538	-5.80617	0.174488	0.261732	2.32844	0.330488	4.32639	11.173	2.54522	-4.0803	0.0260473	0.0720557	2.12148	0.123528	4.11943	11.173	2.31899	-4.5423	0.0392604	0.122756	2.07398	0.0760352	4.07193	11.173
1525	tr|E9PN66|E9PN66_HUMAN Tumor protein p53-inducible protein 11 (Fragment) OS=Homo sapiens OX=9606 GN=TP53I11 PE=1 SV=1;tr|E9PNB3|E9PNB3_HUMAN Tumor protein p53-inducible protein 11 OS=Homo sapiens OX=9606 GN=TP53I11 PE=1 SV=1;tr|E9PKN9|E9PKN9_HUMAN Tumor pr	E9PN66;E9PNB3;E9PKN9;E9PS55;E9PMY0;E9PMW4;E9PQ46;E9PIN5;E9PIK4;U3KQ32;E9PKZ4;E9PPM1;O14683	2.4808	E9PN66	TP53I11	Tumor protein p53-inducible protein 11 (Fragment)	13.5047	15.0669	14.3468	14.8693	15.2008	14.0467	14.2572	14.5442	15.0547	15.333	12.8244	14.9712	14.4576	14.5451	14.8813	1.30652	0.733318	1.87973	14.5269	4.90196	0.449495	0.000253389	0.00327196	0.990962	0.417757	1.56417	14.5269	3.718	-1.80283	0.00239927	0.0141577	1.36445	0.791242	1.93765	14.5269	5.11929	0.790416	0.000170646	0.00260106	1.67976	1.10656	2.25297	14.5269
4471	sp|Q5VYY1|ANR22_HUMAN Ankyrin repeat domain-containing protein 22 OS=Homo sapiens OX=9606 GN=ANKRD22 PE=2 SV=1	Q5VYY1	4.8674	Q5VYY1	ANKRD22	Ankyrin repeat domain-containing protein 22	15.3006	16.5852	16.3517	16.3182	15.729	15.35	16.5648	16.445	16.3202	15.4804	15.268	16.6162	16.2694	16.6464	16.2982	1.28253	0.949006	1.61605	16.1029	8.26999	5.87787	1.13261e-06	0.000138657	1.04916	0.715633	1.38268	16.1029	6.76515	3.64921	1.05333e-05	0.000456229	1.12206	0.78854	1.45558	16.1029	7.23527	4.3455	5.0882e-06	0.00023574	0.529682	0.19616	0.863205	16.1029
509	tr|A0A286YF22|A0A286YF22_HUMAN D-3-phosphoglycerate dehydrogenase OS=Homo sapiens OX=9606 GN=PHGDH PE=1 SV=1;sp|O43175|SERA_HUMAN D-3-phosphoglycerate dehydrogenase OS=Homo sapiens OX=9606 GN=PHGDH PE=1 SV=4;tr|A0A2C9F2M7|A0A2C9F2M7_HUMAN D-3-phosphoglycer	A0A286YF22;O43175;A0A2C9F2M7;A0A286YFA2;A0A286YFL2	60.631	A0A286YF22	PHGDH	D-3-phosphoglycerate dehydrogenase	20.8986	22.3883	21.807	21.4661	20.3365	20.8621	22.051	21.7851	21.3521	20.4222	20.9019	22.0354	21.3903	21.2286	20.3363	1.2707	1.02272	1.51869	21.2841	11.02	9.22339	3.68063e-08	1.56206e-05	0.773244	0.52526	1.02123	21.2841	6.70587	3.55494	1.15697e-05	0.000481467	0.461405	0.213421	0.70939	21.2841	4.00148	-1.3181	0.00138381	0.0111369	-0.522497	-0.770481	-0.274512	21.2841
4316	sp|Q58FF6|H90B4_HUMAN Putative heat shock protein HSP 90-beta 4 OS=Homo sapiens OX=9606 GN=HSP90AB4P PE=5 SV=1	Q58FF6	3.8185	Q58FF6	HSP90AB4P	Putative heat shock protein HSP 90-beta 4	17.7258	17.8429	18.3997	18.0524	18.2164	17.9129	21.2134	17.8616	18.4003	16.5824	18.0526	18.4263	18.0638	17.7379	17.7521	1.26369	-0.15197	2.67935	18.1494	1.92855	-5.09795	0.075923	0.138704	0.211241	-1.20442	1.6269	18.1494	0.32238	-6.78524	0.752293	0.826121	0.166402	-1.24926	1.58206	18.1494	0.253951	-6.88235	0.803508	0.886197	-0.380177	-1.79584	1.03548	18.1494
151	tr|A0A087X0P0|A0A087X0P0_HUMAN Centromere-associated protein E OS=Homo sapiens OX=9606 GN=CENPE PE=1 SV=1;sp|Q02224|CENPE_HUMAN Centromere-associated protein E OS=Homo sapiens OX=9606 GN=CENPE PE=1 SV=2	A0A087X0P0;Q02224	5.5788	A0A087X0P0	CENPE	Centromere-associated protein E	14.376	16.6106	15.9214	14.6985	14.2185	13.9579	15.1519	13.723	13.8337	13.8972	13.6622	13.929	13.7167	13.5054	13.4899	1.23179	-0.166114	2.62969	14.3128	1.90375	-5.13728	0.0793266	0.143323	0.454991	-0.942913	1.85289	14.3128	0.703194	-6.58201	0.494343	0.611762	0.0138158	-1.38409	1.41172	14.3128	0.0213526	-6.91641	0.983289	0.993117	-0.130194	-1.5281	1.26771	14.3128
3204	sp|P30838|AL3A1_HUMAN Aldehyde dehydrogenase, dimeric NADP-preferring OS=Homo sapiens OX=9606 GN=ALDH3A1 PE=1 SV=3;tr|C9JMC5|C9JMC5_HUMAN Aldehyde dehydrogenase, dimeric NADP-preferring (Fragment) OS=Homo sapiens OX=9606 GN=ALDH3A1 PE=1 SV=1;tr|E9PNN6|E9PN	P30838;C9JMC5;E9PNN6;I3L3I9;A8MYB8;C9JKT2	80.017	P30838	ALDH3A1	Aldehyde dehydrogenase, dimeric NADP-preferring	21.6581	23.2296	23.9251	23.6384	23.0842	21.7941	23.0138	23.8125	23.702	23.0988	21.8176	22.7033	23.9512	23.7466	24.1948	1.22559	0.74223	1.70895	23.158	5.45301	1.44661	9.41339e-05	0.0017471	2.13968	1.65631	2.62304	23.158	9.52003	7.50395	2.17441e-07	3.81948e-05	1.93906	1.4557	2.42242	23.158	8.62743	6.34547	6.94341e-07	6.90653e-05	1.70266	1.21929	2.18602	23.158
769	tr|B4DI28|B4DI28_HUMAN Polypyrimidine tract-binding protein 2 OS=Homo sapiens OX=9606 GN=PTBP2 PE=1 SV=1;tr|A0A6Q8PH43|A0A6Q8PH43_HUMAN Polypyrimidine tract-binding protein 2 OS=Homo sapiens OX=9606 GN=PTBP2 PE=1 SV=1;tr|A0A6Q8PFC0|A0A6Q8PFC0_HUMAN Polypyr	B4DI28;A0A6Q8PH43;A0A6Q8PFC0;A0A6Q8PEZ3;A0A6Q8PFE6;A0A7I2RVZ4;Q9UKA9	3.3592	B4DI28	PTBP2	Polypyrimidine tract-binding protein 2	12.5506	13.8583	13.1366	12.9662	13.1448	12.6682	13.9375	13.2044	12.5265	12.9878	12.6775	13.6569	13.5301	13.1533	15.1926	1.18546	0.304924	2.066	13.2794	2.89536	-3.38155	0.0120361	0.0367313	0.658285	-0.222251	1.53882	13.2794	1.60779	-5.58558	0.130829	0.231199	0.249915	-0.63062	1.13045	13.2794	0.610392	-6.72129	0.551661	0.70947	1.143	0.26246	2.02353	13.2794
2455	sp|O60218|AK1BA_HUMAN Aldo-keto reductase family 1 member B10 OS=Homo sapiens OX=9606 GN=AKR1B10 PE=1 SV=2	O60218	13.067	O60218	AKR1B10	Aldo-keto reductase family 1 member B10	18.0717	19.6197	20.1638	19.9676	18.3656	18.3554	19.3608	20.2425	20.0342	18.196	18.3526	19.3383	20.3981	20.3976	19.1949	1.17974	0.7391	1.62037	19.3372	5.75795	1.98088	5.53935e-05	0.00132073	2.0082	1.56757	2.44884	19.3372	9.80146	7.84494	1.5336e-07	3.36527e-05	1.87324	1.43261	2.31388	19.3372	9.14275	7.02334	3.51581e-07	4.47633e-05	0.325597	-0.115039	0.766233	19.3372
326	tr|A0A0C4DG34|A0A0C4DG34_HUMAN Arf-GAP domain and FG repeat-containing protein 2 OS=Homo sapiens OX=9606 GN=AGFG2 PE=1 SV=1;sp|O95081|AGFG2_HUMAN Arf-GAP domain and FG repeat-containing protein 2 OS=Homo sapiens OX=9606 GN=AGFG2 PE=1 SV=2	A0A0C4DG34;O95081	3.1372	A0A0C4DG34	AGFG2	Arf-GAP domain and FG repeat-containing protein 2	9.19785	10.8094	10.3539	10.7907	9.04171	10.2554	10.3235	10.9941	10.0919	NA	9.02091	10.8244	9.92916	10.0531	NA	1.16103	0.415918	1.90613	10.1297	3.40782	-2.53655	0.00543314	0.0217667	0.934296	0.189188	1.6794	10.1297	2.74233	-3.73733	0.0183339	0.0565942	0.820509	0.075401	1.56562	10.1297	2.40834	-4.39229	0.0336448	0.110168	-0.449682	-1.50342	0.60406	10.1297
795	tr|A0A6Q8PGN6|A0A6Q8PGN6_HUMAN Calpain inhibitor OS=Homo sapiens OX=9606 GN=CAST PE=1 SV=1;tr|E7EVY3|E7EVY3_HUMAN Calpain inhibitor OS=Homo sapiens OX=9606 GN=CAST PE=1 SV=1;tr|A0A6Q8PFF6|A0A6Q8PFF6_HUMAN Calpain inhibitor OS=Homo sapiens OX=9606 GN=CAST P	A0A6Q8PGN6;E7EVY3;A0A6Q8PFF6;H0Y9H6;H0YD33	2.5349	A0A6Q8PGN6	CAST	Calpain inhibitor	12.1481	13.553	13.0293	13.1442	12.1507	12.2825	12.9751	13.3436	11.8394	11.3167	12.265	13.5896	12.8887	11.9584	12.0734	1.14077	0.489754	1.79178	12.5705	3.76852	-1.70198	0.00217428	0.0122491	0.855358	0.204346	1.50637	12.5705	2.82567	-3.51615	0.0137898	0.0466028	0.0821874	-0.568824	0.733199	12.5705	0.271506	-6.87757	0.790078	0.875855	-0.384905	-1.03592	0.266107	12.5705
122	tr|B8ZZA3|B8ZZA3_HUMAN Kynureninase OS=Homo sapiens OX=9606 GN=KYNU PE=1 SV=1;tr|A0A087WYM2|A0A087WYM2_HUMAN Kynureninase (Fragment) OS=Homo sapiens OX=9606 GN=KYNU PE=1 SV=1;tr|A0A087X297|A0A087X297_HUMAN Kynureninase (Fragment) OS=Homo sapiens OX=9606 GN	B8ZZA3;A0A087WYM2;A0A087X297;Q16719	2.427	B8ZZA3	KYNU	Kynureninase	16.1053	17.223	16.1105	15.5745	15.0485	15.7399	16.8525	15.8972	15.3555	14.7488	15.8477	16.9358	16.0945	15.2462	15.0503	1.10616	0.829317	1.38299	15.8554	8.59314	6.31658	7.2725e-07	0.000112919	0.136432	-0.140407	0.413271	15.8554	1.05987	-6.26778	0.307658	0.429386	-0.505544	-0.782383	-0.228705	15.8554	-3.92731	-1.46157	0.00159724	0.0122803	-0.948445	-1.22528	-0.671606	15.8554
1099	tr|B4E2I4|B4E2I4_HUMAN Glutamate--cysteine ligase OS=Homo sapiens OX=9606 GN=GCLC PE=1 SV=1;sp|P48506|GSH1_HUMAN Glutamate--cysteine ligase catalytic subunit OS=Homo sapiens OX=9606 GN=GCLC PE=1 SV=2;tr|A0A2R8YEL6|A0A2R8YEL6_HUMAN Glutamate--cysteine ligas	B4E2I4;P48506;A0A2R8YEL6;E1CEI4;A0A2R8Y648	83.789	B4E2I4	GCLC	Glutamate--cysteine ligase	21.7255	23.1391	23.6558	23.1873	21.9251	21.7839	22.8785	23.5621	23.1036	21.6952	21.9091	22.6417	23.5444	23.2983	22.2631	1.08027	0.787349	1.37319	22.6875	7.93132	5.40361	1.82548e-06	0.000200362	1.78127	1.48835	2.07419	22.6875	13.078	11.2426	4.32692e-09	5.58221e-06	1.39024	1.09732	1.68316	22.6875	10.2071	8.32716	9.39586e-08	1.72342e-05	0.154953	-0.137968	0.447873	22.6875
1529	tr|E9PKP4|E9PKP4_HUMAN Macrophage colony-stimulating factor 1 (Fragment) OS=Homo sapiens OX=9606 GN=CSF1 PE=1 SV=1;tr|H7BY18|H7BY18_HUMAN Macrophage colony-stimulating factor 1 (Fragment) OS=Homo sapiens OX=9606 GN=CSF1 PE=1 SV=1;tr|E9PQ08|E9PQ08_HUMAN Mac	E9PKP4;H7BY18;E9PQ08;E9PJA2;P09603	6.1103	E9PKP4	CSF1	Macrophage colony-stimulating factor 1 (Fragment)	13.4011	14.3987	13.1513	13.2112	13.023	13.5111	14.5374	13.1382	13.2155	12.5288	13.4503	14.5306	13.2693	12.898	12.3117	1.03475	0.730478	1.33902	13.3718	7.31371	4.49905	4.51921e-06	0.000305085	-0.26787	-0.572141	0.0364007	13.3718	-1.89333	-5.15403	0.0797758	0.160993	-0.34593	-0.650201	-0.0416594	13.3718	-2.44507	-4.28757	0.0287505	0.0979178	-0.83299	-1.13726	-0.528719	13.3718
1635	tr|F5H0C4|F5H0C4_HUMAN Proteasomal ATPase-associated factor 1 OS=Homo sapiens OX=9606 GN=PAAF1 PE=1 SV=1;sp|Q9BRP4|PAAF1_HUMAN Proteasomal ATPase-associated factor 1 OS=Homo sapiens OX=9606 GN=PAAF1 PE=1 SV=2	F5H0C4;Q9BRP4	2.4636	F5H0C4	PAAF1	Proteasomal ATPase-associated factor 1	13.9845	15.0994	14.3886	14.7265	14.3156	13.9159	14.6505	14.5601	14.346	13.3502	13.8748	15.0346	14.6715	14.4418	14.3936	1.00312	0.5352	1.47105	14.3836	4.61044	-0.0929711	0.000434673	0.00455869	0.615033	0.14711	1.08296	14.3836	2.82675	-3.51414	0.013761	0.0465337	0.579725	0.111802	1.04765	14.3836	2.66447	-3.88682	0.0188611	0.0727217	0.0947815	-0.373142	0.562705	14.3836
52	tr|A0A087WZI5|A0A087WZI5_HUMAN Isoaspartyl peptidase/L-asparaginase (Fragment) OS=Homo sapiens OX=9606 GN=ASRGL1 PE=1 SV=6;tr|A0A087WUG3|A0A087WUG3_HUMAN Isoaspartyl peptidase/L-asparaginase OS=Homo sapiens OX=9606 GN=ASRGL1 PE=1 SV=1;sp|Q7L266|ASGL1_HUMAN	A0A087WZI5;A0A087WUG3;Q7L266	5.0032	A0A087WZI5	ASRGL1	Isoaspartyl peptidase/L-asparaginase (Fragment)	14.1184	15.2141	15.5012	14.9043	13.6849	14.2743	15.2335	15.4543	14.6345	13.2899	14.0885	15.0252	15.0644	14.7761	14.22	0.997198	0.604243	1.39015	14.6322	5.45759	1.45473	9.33786e-05	0.00173815	1.17953	0.786574	1.57249	14.6322	6.45548	3.15119	1.72884e-05	0.000622673	0.611233	0.218277	1.00419	14.6322	3.34523	-2.591	0.00497952	0.0280776	-0.428801	-0.821757	-0.0358453	14.6322
3380	sp|P48163|MAOX_HUMAN NADP-dependent malic enzyme OS=Homo sapiens OX=9606 GN=ME1 PE=1 SV=1	P48163	44.385	P48163	ME1	NADP-dependent malic enzyme	21.1644	22.4185	21.9201	21.5385	20.5124	21.1269	22.027	21.8902	21.3871	20.2779	21.2254	22.0535	21.7418	21.1245	21.0203	0.99405	0.643439	1.34466	21.4286	6.09742	2.56015	3.11661e-05	0.000977357	0.678446	0.327836	1.02906	21.4286	4.16153	-0.947778	0.00101706	0.00829407	0.177793	-0.172818	0.528403	21.4286	1.09057	-6.3108	0.294401	0.483029	-0.568713	-0.919323	-0.218102	21.4286
1963	tr|H3BTN5|H3BTN5_HUMAN Pyruvate kinase (Fragment) OS=Homo sapiens OX=9606 GN=PKM PE=1 SV=1;tr|H3BQ34|H3BQ34_HUMAN Pyruvate kinase OS=Homo sapiens OX=9606 GN=PKM PE=1 SV=1	H3BTN5;H3BQ34	4.2379	H3BTN5	PKM	Pyruvate kinase (Fragment)	19.1101	20.3368	19.8608	19.3249	19.229	19.0085	19.9212	19.8561	19.3493	18.9774	19.0632	19.8877	19.5877	18.9481	19.5147	0.987915	0.660624	1.31521	19.465	6.49155	3.21181	1.63078e-05	0.000676324	0.707549	0.380258	1.03484	19.465	4.64927	-0.0229517	0.000404283	0.00462131	0.146797	-0.180494	0.474089	19.465	0.9646	-6.43838	0.351577	0.53918	0.179714	-0.147577	0.507005	19.465
249	tr|A0A0A0MSI3|A0A0A0MSI3_HUMAN Parathion hydrolase-related protein OS=Homo sapiens OX=9606 GN=PTER PE=1 SV=1;sp|Q96BW5|PTER_HUMAN Phosphotriesterase-related protein OS=Homo sapiens OX=9606 GN=PTER PE=1 SV=1	A0A0A0MSI3;Q96BW5	1.9553	A0A0A0MSI3	PTER	Parathion hydrolase-related protein	14.6848	15.7155	15.4786	15.2001	14.5238	14.6082	15.5762	15.2445	14.9224	14.5695	14.6668	15.5631	15.2673	15.2577	14.8742	0.965016	0.734035	1.196	15.0769	8.9851	6.83118	4.31642e-07	8.18362e-05	0.676909	0.445929	0.907889	15.0769	6.30258	2.90018	2.21869e-05	0.000707177	0.473451	0.242471	0.704431	15.0769	4.40822	-0.537359	0.00063578	0.00632403	0.0025864	-0.228394	0.233566	15.0769
4875	sp|Q8N392|RHG18_HUMAN Rho GTPase-activating protein 18 OS=Homo sapiens OX=9606 GN=ARHGAP18 PE=1 SV=3	Q8N392	14.456	Q8N392	ARHGAP18	Rho GTPase-activating protein 18	18.289	19.4771	19.0166	18.4683	18.2377	18.266	19.2108	18.7405	18.32	18.1191	18.3661	19.1251	18.5144	18.1647	18.8561	0.963958	0.593234	1.33468	18.6114	5.59205	1.69182	7.37997e-05	0.00154036	0.450116	0.0793929	0.82084	18.6114	2.61119	-3.91469	0.0209061	0.0621063	0.010615	-0.360108	0.381338	18.6114	0.0615791	-6.91464	0.951793	0.975703	0.0972494	-0.273474	0.467973	18.6114
4558	sp|Q6PCE3|PGM2L_HUMAN Glucose 1,6-bisphosphate synthase OS=Homo sapiens OX=9606 GN=PGM2L1 PE=1 SV=3	Q6PCE3	6.9342	Q6PCE3	PGM2L1	Glucose 1,6-bisphosphate synthase	16.6783	17.8117	17.2758	16.853	16.7038	16.6403	17.6692	17.2623	16.9549	16.088	16.6961	17.4127	17.0567	15.9858	16.4437	0.959624	0.503118	1.41613	16.9022	4.52082	-0.261581	0.000514172	0.00495942	0.526693	0.070186	0.9832	16.9022	2.48126	-4.15122	0.0268312	0.073572	-0.0736378	-0.530145	0.382869	16.9022	-0.34691	-6.85296	0.733966	0.837879	-0.259739	-0.716246	0.196767	16.9022
3181	sp|P30043|BLVRB_HUMAN Flavin reductase (NADPH) OS=Homo sapiens OX=9606 GN=BLVRB PE=1 SV=3;tr|M0R192|M0R192_HUMAN Flavin reductase (NADPH) OS=Homo sapiens OX=9606 GN=BLVRB PE=1 SV=1;tr|A0A2R8YEP4|A0A2R8YEP4_HUMAN Flavin reductase (NADPH) OS=Homo sapiens OX=	P30043;M0R192;A0A2R8YEP4;A0A2R8Y7Y9;M0QZL1	51.073	P30043	BLVRB	Flavin reductase (NADPH)	21.0727	22.2326	22.0664	21.6486	20.8995	20.8916	21.863	21.9963	21.6127	20.853	21.0072	21.7361	21.8698	21.3828	21.2026	0.953388	0.679436	1.22734	21.489	7.48443	4.75433	3.50077e-06	0.000281517	0.987012	0.71306	1.26096	21.489	7.74839	5.13996	2.37595e-06	0.000171905	0.557533	0.283581	0.831484	21.489	4.37682	-0.597187	0.000674726	0.00662856	-0.0054773	-0.279429	0.268475	21.489
5884	sp|Q9NPD8|UBE2T_HUMAN Ubiquitin-conjugating enzyme E2 T OS=Homo sapiens OX=9606 GN=UBE2T PE=1 SV=1	Q9NPD8	20.498	Q9NPD8	UBE2T	Ubiquitin-conjugating enzyme E2 T	14.8855	15.9685	15.4272	14.9969	14.9823	14.9914	15.7695	15.4583	14.3556	14.9263	14.8914	15.8608	15.2631	14.4684	15.2611	0.943501	0.644155	1.24285	15.1671	6.77848	3.67207	1.0314e-05	0.000525954	0.460098	0.160753	0.759444	15.1671	3.30553	-2.60076	0.00538336	0.0243956	-0.315857	-0.615202	-0.0165115	15.1671	-2.26924	-4.59913	0.0400905	0.1248	0.13377	-0.165575	0.433115	15.1671
1228	tr|C9JBI3|C9JBI3_HUMAN O-phosphoserine phosphohydrolase (Fragment) OS=Homo sapiens OX=9606 GN=PSPH PE=1 SV=1;sp|P78330|SERB_HUMAN Phosphoserine phosphatase OS=Homo sapiens OX=9606 GN=PSPH PE=1 SV=2	C9JBI3;P78330	11.261	C9JBI3	PSPH	O-phosphoserine phosphohydrolase (Fragment)	17.9704	19.0501	18.7568	18.5563	17.1536	17.9153	18.8265	18.5588	18.5547	17.2802	17.9796	18.7619	18.3975	17.8813	17.3713	0.924423	0.592006	1.25684	18.201	5.98067	2.3628	3.79138e-05	0.00109709	0.615937	0.28352	0.948355	18.201	3.98488	-1.28725	0.00142889	0.0101537	0.375653	0.0432351	0.70807	18.201	2.43033	-4.31404	0.0295691	0.0996088	-0.686716	-1.01913	-0.354299	18.201
3105	sp|P23381|SYWC_HUMAN Tryptophan--tRNA ligase, cytoplasmic OS=Homo sapiens OX=9606 GN=WARS1 PE=1 SV=2	P23381	76.11	P23381	WARS1	Tryptophan--tRNA ligase, cytoplasmic	23.4887	24.5314	24.5388	23.8907	22.4333	23.6823	24.5192	24.4117	23.4378	21.9706	23.5696	24.4441	24.0758	22.9518	22.231	0.918043	0.51016	1.32592	23.6118	4.84051	0.33594	0.000283672	0.00354089	0.761857	0.353975	1.16974	23.6118	4.017	-1.2254	0.00134298	0.00978348	-0.153438	-0.56132	0.254445	23.6118	-0.809021	-6.57691	0.432423	0.610467	-1.36855	-1.77643	-0.960667	23.6118
4318	sp|Q58FG1|HS904_HUMAN Putative heat shock protein HSP 90-alpha A4 OS=Homo sapiens OX=9606 GN=HSP90AA4P PE=5 SV=1	Q58FG1	2.466	Q58FG1	HSP90AA4P	Putative heat shock protein HSP 90-alpha A4	11.8668	13.2134	12.2531	11.8596	NA	12.2592	12.7484	NA	12.2946	NA	NA	NA	12.0697	11.7504	12.3908	0.917896	0.417416	1.41838	12.2706	4.17794	-1.47635	0.00262898	0.0138812	0.0983966	-0.402084	0.598877	12.2706	0.447866	-6.53163	0.66531	0.756163	-0.0948048	-0.551679	0.36207	12.2706	-0.472704	-6.68467	0.648181	0.781352	0.327807	-0.285154	0.940768	12.2706
2178	tr|K7ER90|K7ER90_HUMAN Eukaryotic translation initiation factor 3 subunit G (Fragment) OS=Homo sapiens OX=9606 GN=EIF3G PE=1 SV=1	K7ER90	3.8196	K7ER90	EIF3G	Eukaryotic translation initiation factor 3 subunit G (Fragment)	15.2047	15.1691	15.1726	15.136	15.3846	14.8871	17.6847	14.9604	15.3897	14.4654	14.8988	14.8845	14.9727	15.0032	14.741	0.915888	-0.191677	2.02345	15.197	1.77843	-5.32938	0.0976754	0.168556	0.0383797	-1.06919	1.14594	15.197	0.0745238	-6.83741	0.941678	0.960712	0.179427	-0.928139	1.28699	15.197	0.348402	-6.85242	0.73287	0.837303	-0.133184	-1.24075	0.974381	15.197
160	tr|H0Y820|H0Y820_HUMAN Serine/threonine-protein kinase Chk2 (Fragment) OS=Homo sapiens OX=9606 GN=CHEK2 PE=1 SV=1;tr|A0A087X102|A0A087X102_HUMAN Serine/threonine-protein kinase Chk2 OS=Homo sapiens OX=9606 GN=CHEK2 PE=1 SV=2;tr|A0A7P0MUT5|A0A7P0MUT5_HUMAN	H0Y820;A0A087X102;A0A7P0MUT5;O96017;H0Y4V6	15.114	H0Y820	CHEK2	Serine/threonine-protein kinase Chk2 (Fragment)	12.7214	13.421	13.8051	12.8937	11.8765	13.0109	13.691	13.2753	12.5869	12.0608	12.5046	13.8455	13.2476	12.6228	12.8246	0.906875	0.424156	1.38959	12.9592	4.04032	-1.17751	0.0012839	0.00879416	0.69706	0.214342	1.17978	12.9592	3.10556	-2.98509	0.00797329	0.0318083	-0.0444502	-0.527169	0.438268	12.9592	-0.198035	-6.89584	0.845946	0.912761	-0.491643	-0.974361	-0.00892434	12.9592
763	tr|A0A6I8PTT9|A0A6I8PTT9_HUMAN Glutamine--fructose-6-phosphate transaminase (isomerizing) OS=Homo sapiens OX=9606 GN=GFPT1 PE=1 SV=1;sp|Q06210|GFPT1_HUMAN Glutamine--fructose-6-phosphate aminotransferase [isomerizing] 1 OS=Homo sapiens OX=9606 GN=GFPT1 PE=	A0A6I8PTT9;Q06210;A0A6I8PRN4	42.363	A0A6I8PTT9	GFPT1	Glutamine--fructose-6-phosphate transaminase (isomerizing)	21.1286	22.1636	21.7312	21.4628	20.428	21.0393	21.9738	21.6395	21.2349	20.0354	21.1154	21.8604	21.5012	20.8771	20.7274	0.904844	0.554602	1.25509	21.2612	5.55607	1.62863	7.85765e-05	0.00158247	0.52951	0.179267	0.879753	21.2612	3.25138	-2.7051	0.00598759	0.0261786	0.0971752	-0.253067	0.447418	21.2612	0.596691	-6.72985	0.560511	0.715216	-0.697507	-1.04775	-0.347265	21.2612
3533	sp|P54687|BCAT1_HUMAN Branched-chain-amino-acid aminotransferase, cytosolic OS=Homo sapiens OX=9606 GN=BCAT1 PE=1 SV=3	P54687	21.897	P54687	BCAT1	Branched-chain-amino-acid aminotransferase, cytosolic	18.0213	19.1128	18.1783	17.9853	18.0528	17.8022	18.7691	18.0569	17.6518	17.8307	17.9778	18.6324	17.9512	17.4601	18.7396	0.904385	0.475066	1.3337	18.1482	4.53039	-0.243529	0.000505005	0.00493036	0.128392	-0.300927	0.557712	18.1482	0.643164	-6.62412	0.530808	0.644357	-0.234646	-0.663965	0.194674	18.1482	-1.17542	-6.21749	0.259983	0.445866	0.273981	-0.155338	0.703301	18.1482
365	tr|A0A0D9SFE4|A0A0D9SFE4_HUMAN Dynamin GTPase OS=Homo sapiens OX=9606 GN=DNM1 PE=1 SV=1;tr|A0A0U1RQP1|A0A0U1RQP1_HUMAN Dynamin GTPase OS=Homo sapiens OX=9606 GN=DNM1 PE=1 SV=1;sp|Q05193|DYN1_HUMAN Dynamin-1 OS=Homo sapiens OX=9606 GN=DNM1 PE=1 SV=2;tr|A0A0	A0A0D9SFE4;A0A0U1RQP1;Q05193;A0A0D9SFB1;A0A1B0GU67;A0A1B0GUX5	33.723	A0A0D9SFE4	DNM1	Dynamin GTPase	19.5562	20.6289	20.4746	20.0545	19.5077	19.5088	20.3388	20.4003	19.7604	19.3144	19.5615	20.3678	20.2979	19.7052	20.0065	0.903035	0.586603	1.21947	19.9656	6.13745	2.62736	2.91534e-05	0.000942083	0.848779	0.532348	1.16521	19.9656	5.7687	1.99721	5.43802e-05	0.0013165	0.297864	-0.0185676	0.614295	19.9656	2.02442	-5.01495	0.0630163	0.170635	0.0673626	-0.249069	0.383794	19.9656
2109	tr|J3QR84|J3QR84_HUMAN Secernin-2 (Fragment) OS=Homo sapiens OX=9606 GN=SCRN2 PE=1 SV=1;tr|J3QRJ1|J3QRJ1_HUMAN Secernin-2 OS=Homo sapiens OX=9606 GN=SCRN2 PE=1 SV=1;tr|J3QL71|J3QL71_HUMAN Secernin-2 OS=Homo sapiens OX=9606 GN=SCRN2 PE=1 SV=1;sp|Q96FV2|SCRN	J3QR84;J3QRJ1;J3QL71;Q96FV2	7.5423	J3QR84	SCRN2	Secernin-2 (Fragment)	12.1311	13.1852	12.9258	12.5946	12.3133	12.0245	12.9552	12.8619	12.7122	11.6839	12.1363	12.8502	12.8445	12.5749	12.4538	0.899559	0.574813	1.2243	12.5498	5.95729	2.32304	3.94405e-05	0.00110607	0.780065	0.455319	1.10481	12.5498	5.16595	0.929514	0.000156885	0.00256025	0.529936	0.20519	0.854682	12.5498	3.50948	-2.27247	0.00360746	0.0223541	0.0530248	-0.271721	0.377771	12.5498
5626	sp|Q9BYC8|RM32_HUMAN 39S ribosomal protein L32, mitochondrial OS=Homo sapiens OX=9606 GN=MRPL32 PE=1 SV=1	Q9BYC8	17.412	Q9BYC8	MRPL32	39S ribosomal protein L32, mitochondrial	17.3585	17.4552	17.5549	17.4103	17.3695	17.3686	19.8921	17.3974	17.6292	16.7654	17.3218	17.3697	17.2054	17.1437	16.9242	0.889367	-0.123526	1.90226	17.4777	1.88834	-5.15837	0.0804876	0.144987	0.0362701	-0.976623	1.04916	17.4777	0.0770102	-6.83721	0.939736	0.959631	0.0447841	-0.968109	1.05768	17.4777	0.0950875	-6.91185	0.925631	0.961424	-0.329942	-1.34284	0.682951	17.4777
1075	tr|B4DLR8|B4DLR8_HUMAN NAD(P)H dehydrogenase [quinone] 1 OS=Homo sapiens OX=9606 GN=NQO1 PE=1 SV=1;sp|P15559|NQO1_HUMAN NAD(P)H dehydrogenase [quinone] 1 OS=Homo sapiens OX=9606 GN=NQO1 PE=1 SV=1;tr|H3BNV2|H3BNV2_HUMAN NAD(P)H dehydrogenase [quinone] 1 OS=	B4DLR8;P15559;H3BNV2;H3BRK3	28.75	B4DLR8	NQO1	NAD(P)H dehydrogenase [quinone] 1	22.241	23.4665	23.6845	23.0482	22.1699	22.3078	23.0542	23.5483	22.7131	22.1854	22.3406	22.9965	23.4384	22.9082	22.3673	0.875954	0.617193	1.13471	22.8313	7.28024	4.44853	4.75329e-06	0.000311953	1.26064	1.00188	1.5194	22.8313	10.4774	8.629	6.8363e-08	2.33993e-05	0.593362	0.334601	0.852122	22.8313	4.93156	0.445412	0.000240021	0.00330274	-0.0555783	-0.314339	0.203182	22.8313
1239	tr|C9JHG2|C9JHG2_HUMAN Raftlin (Fragment) OS=Homo sapiens OX=9606 GN=RFTN1 PE=1 SV=1;sp|Q14699|RFTN1_HUMAN Raftlin OS=Homo sapiens OX=9606 GN=RFTN1 PE=1 SV=4;tr|C9JWQ9|C9JWQ9_HUMAN Raftlin (Fragment) OS=Homo sapiens OX=9606 GN=RFTN1 PE=1 SV=1;tr|F8WAR1|F8W	C9JHG2;Q14699;C9JWQ9;F8WAR1;C9JRN3;G3XAJ6	2.2497	C9JHG2	RFTN1	Raftlin (Fragment)	19.9559	20.7395	20.5142	19.8641	19.6025	19.7282	21.1229	20.3047	19.6879	19.0612	19.8368	20.2741	20.3147	19.4313	19.7185	0.871889	0.445069	1.29871	20.0104	4.39319	-0.503022	0.000654129	0.0058159	0.53756	0.110741	0.964379	20.0104	2.70861	-3.73478	0.0173153	0.054389	-0.179189	-0.606008	0.24763	20.0104	-0.902881	-6.49592	0.382295	0.56769	-0.379575	-0.806394	0.0472445	20.0104
1389	tr|E5RFX4|E5RFX4_HUMAN Lymphokine-activated killer T-cell-originated protein kinase (Fragment) OS=Homo sapiens OX=9606 GN=PBK PE=1 SV=2;sp|Q96KB5|TOPK_HUMAN Lymphokine-activated killer T-cell-originated protein kinase OS=Homo sapiens OX=9606 GN=PBK PE=1 SV	E5RFX4;Q96KB5	3.8058	E5RFX4	PBK	Lymphokine-activated killer T-cell-originated protein kinase (Fragment)	15.8971	16.9104	16.7224	15.6831	16.1813	15.7721	16.6871	16.4692	15.8046	15.9885	15.8874	16.5689	16.538	15.6561	16.7098	0.869936	0.552998	1.18687	16.2317	5.90304	2.23048	4.32367e-05	0.00116629	0.724316	0.407377	1.04125	16.2317	4.91492	0.470713	0.000247445	0.00335818	-0.137616	-0.454554	0.179322	16.2317	-0.933806	-6.4675	0.36668	0.552131	0.440971	0.124033	0.757909	16.2317
421	tr|H0YMA4|H0YMA4_HUMAN PCNA-associated factor OS=Homo sapiens OX=9606 GN=PCLAF PE=1 SV=1;tr|A0A0U1RQM0|A0A0U1RQM0_HUMAN PCNA-associated factor OS=Homo sapiens OX=9606 PE=1 SV=1;sp|Q15004|PAF15_HUMAN PCNA-associated factor OS=Homo sapiens OX=9606 GN=PCLAF P	H0YMA4;A0A0U1RQM0;Q15004;A0A0U1RQC1;H0YKX3	10.17	H0YMA4	PCLAF	PCNA-associated factor	14.5585	15.628	15.2387	14.8545	14.4389	14.5589	15.3671	15.4409	15.073	14.6815	14.6621	15.3867	14.7866	14.4971	14.3036	0.867442	0.509937	1.22495	14.8984	5.21821	1.02655	0.000142836	0.00228835	0.562251	0.204746	0.919756	14.8984	3.38229	-2.45257	0.00462995	0.0220485	0.215043	-0.142462	0.572548	14.8984	1.29362	-6.07817	0.217327	0.395061	-0.11847	-0.475975	0.239035	14.8984
4596	sp|Q6XQN6|PNCB_HUMAN Nicotinate phosphoribosyltransferase OS=Homo sapiens OX=9606 GN=NAPRT PE=1 SV=2;tr|G5E977|G5E977_HUMAN Nicotinate phosphoribosyltransferase OS=Homo sapiens OX=9606 GN=NAPRT PE=1 SV=1;tr|C9J8U2|C9J8U2_HUMAN Nicotinate phosphoribosyltran	Q6XQN6;G5E977;C9J8U2	30.39	Q6XQN6	NAPRT	Nicotinate phosphoribosyltransferase	18.078	19.1556	19.0648	18.4914	17.9577	18.1201	18.9841	18.981	18.3077	17.6569	18.1728	18.8144	18.8943	18.1472	18.5052	0.861045	0.506631	1.21546	18.4887	5.2249	1.03861	0.000141135	0.00228154	0.856372	0.501958	1.21079	18.4887	5.19654	0.98487	0.000148496	0.00250763	0.191766	-0.162649	0.54618	18.4887	1.16365	-6.23078	0.264566	0.451051	-0.08374	-0.438154	0.270674	18.4887
5890	sp|Q9NPH2|INO1_HUMAN Inositol-3-phosphate synthase 1 OS=Homo sapiens OX=9606 GN=ISYNA1 PE=1 SV=1	Q9NPH2	16.035	Q9NPH2	ISYNA1	Inositol-3-phosphate synthase 1	17.6854	18.6805	18.577	18.5029	17.4714	17.8003	18.6123	18.578	18.7599	17.539	17.7668	18.5425	18.5105	18.2818	17.8183	0.860936	0.623195	1.09868	18.2084	7.78808	5.19845	2.2431e-06	0.000216456	0.804366	0.566625	1.04211	18.2084	7.27634	4.44119	4.78139e-06	0.000280962	0.764045	0.526304	1.00179	18.2084	6.9116	3.84286	8.37077e-06	0.000319092	-0.141239	-0.37898	0.0965017	18.2084
3005	sp|P16930|FAAA_HUMAN Fumarylacetoacetase OS=Homo sapiens OX=9606 GN=FAH PE=1 SV=2	P16930	10.855	P16930	FAH	Fumarylacetoacetase	18.9197	20.048	19.5068	19.1862	18.1864	19.0335	19.7037	19.4828	18.8018	17.9104	18.9015	19.6793	19.2916	18.8902	18.7803	0.858755	0.47581	1.2417	19.0881	4.82276	0.303067	0.000293098	0.00361601	0.475499	0.0925542	0.858444	19.0881	2.6704	-3.80558	0.0186458	0.0572961	0.00782987	-0.375115	0.390775	19.0881	0.0439725	-6.91562	0.965565	0.98294	-0.659218	-1.04216	-0.276273	19.0881
5468	sp|Q99741|CDC6_HUMAN Cell division control protein 6 homolog OS=Homo sapiens OX=9606 GN=CDC6 PE=1 SV=1	Q99741	2.5696	Q99741	CDC6	Cell division control protein 6 homolog	13.5426	14.3668	13.5763	13.1665	13.5819	13.1451	13.9051	13.6884	12.9881	13.7315	13.3655	14.3552	13.3367	13.3565	13.2618	0.857976	0.516914	1.19904	13.5579	5.41009	1.37038	0.000101532	0.00181561	0.182713	-0.158349	0.523775	13.5579	1.15212	-6.16852	0.269113	0.388707	-0.18071	-0.521772	0.160352	13.5579	-1.13949	-6.25771	0.274162	0.461357	0.174032	-0.16703	0.515094	13.5579
2751	sp|P00374|DYR_HUMAN Dihydrofolate reductase OS=Homo sapiens OX=9606 GN=DHFR PE=1 SV=2;tr|B4DM58|B4DM58_HUMAN Dihydrofolate reductase OS=Homo sapiens OX=9606 GN=DHFR PE=1 SV=1	P00374;B4DM58	13.494	P00374	DHFR	Dihydrofolate reductase	18.6344	19.6863	19.4803	18.6484	18.7989	18.4623	19.4017	19.2573	18.6925	18.4878	18.6351	19.2103	19.1958	18.4612	18.8668	0.855469	0.57829	1.13265	18.928	6.63753	3.44746	1.28992e-05	0.000599387	0.733818	0.456639	1.011	18.928	5.69365	1.867	6.18804e-05	0.00142751	0.0234123	-0.253767	0.300591	18.928	0.181655	-6.89913	0.858532	0.920811	0.140557	-0.136623	0.417736	18.928
2620	sp|O76070|SYUG_HUMAN Gamma-synuclein OS=Homo sapiens OX=9606 GN=SNCG PE=1 SV=2	O76070	27.054	O76070	SNCG	Gamma-synuclein	18.6937	19.7408	19.6377	18.9803	18.31	18.6788	19.5114	19.4949	18.7268	17.9323	18.6698	19.3115	19.28	18.3003	18.4559	0.840479	0.475635	1.20532	18.9149	4.9543	0.545848	0.00023025	0.00310001	0.790069	0.425224	1.15491	18.9149	4.65715	-0.00820611	0.000398393	0.00457864	-0.0116254	-0.37647	0.353219	18.9149	-0.068527	-6.91416	0.946363	0.973459	-0.448037	-0.812881	-0.0831923	18.9149
2896	sp|P0DN79|CBSL_HUMAN Cystathionine beta-synthase-like protein OS=Homo sapiens OX=9606 GN=CBSL PE=1 SV=1;sp|P35520|CBS_HUMAN Cystathionine beta-synthase OS=Homo sapiens OX=9606 GN=CBS PE=1 SV=2;tr|H7C2H4|H7C2H4_HUMAN Cystathionine beta-synthase (Fragment) O	P0DN79;P35520;H7C2H4	4.2516	P0DN79	CBSL	Cystathionine beta-synthase-like protein	11.6102	12.905	12.1564	11.7538	12.2118	11.5207	12.3729	12.1282	12.1925	12.0111	12.0215	12.3755	11.9033	11.9387	12.3539	0.833633	0.473256	1.19401	12.097	4.97486	0.58361	0.00022177	0.00304922	0.345138	-0.0152387	0.705515	12.097	2.05968	-4.88384	0.0590959	0.129612	0.244179	-0.116198	0.604556	12.097	1.45718	-5.86854	0.167755	0.331244	0.474796	0.114419	0.835173	12.097
1061	tr|C9IYS1|C9IYS1_HUMAN LIM and cysteine-rich domains protein 1 (Fragment) OS=Homo sapiens OX=9606 GN=LMCD1 PE=1 SV=8;tr|H7C3D2|H7C3D2_HUMAN LIM and cysteine-rich domains protein 1 OS=Homo sapiens OX=9606 GN=LMCD1 PE=1 SV=2;tr|B4DEY6|B4DEY6_HUMAN LIM and cy	C9IYS1;H7C3D2;B4DEY6;Q9NZU5	4.9024	C9IYS1	LMCD1	LIM and cysteine-rich domains protein 1 (Fragment)	13.8736	14.9463	15.0879	14.9485	14.9607	14.1132	14.9339	14.6056	14.7115	15.2366	13.843	14.4172	14.884	14.4351	15.2283	0.822522	0.46234	1.1827	14.6817	4.9112	0.466533	0.000249134	0.00323012	0.91591	0.555728	1.27609	14.6817	5.46882	1.4722	9.15532e-05	0.00182376	0.755106	0.394923	1.11529	14.6817	4.50867	-0.346573	0.00052605	0.00559248	1.19862	0.838439	1.5588	14.6817
10	sp|A0A024RBG1|NUD4B_HUMAN Diphosphoinositol polyphosphate phosphohydrolase NUDT4B OS=Homo sapiens OX=9606 GN=NUDT4B PE=3 SV=1;sp|Q9NZJ9|NUDT4_HUMAN Diphosphoinositol polyphosphate phosphohydrolase 2 OS=Homo sapiens OX=9606 GN=NUDT4 PE=1 SV=2	A0A024RBG1;Q9NZJ9	6.6761	A0A024RBG1	NUDT4B	Diphosphoinositol polyphosphate phosphohydrolase NUDT4B	15.4358	16.3845	15.7192	15.1378	14.613	15.1811	15.9736	15.5442	15.0979	14.678	15.2176	15.9365	15.6803	14.9591	15.0942	0.820005	0.526476	1.11353	15.3769	6.00799	2.40915	3.62085e-05	0.00106927	0.369719	0.0761902	0.663247	15.3769	2.70884	-3.73434	0.0173073	0.054389	-0.213234	-0.506763	0.0802946	15.3769	-1.56232	-5.72426	0.141165	0.29532	-0.483087	-0.776616	-0.189558	15.3769
2789	sp|P04183|KITH_HUMAN Thymidine kinase, cytosolic OS=Homo sapiens OX=9606 GN=TK1 PE=1 SV=2;tr|K7ERV3|K7ERV3_HUMAN Thymidine kinase OS=Homo sapiens OX=9606 GN=TK1 PE=1 SV=1;tr|K7ES52|K7ES52_HUMAN Thymidine kinase OS=Homo sapiens OX=9606 GN=TK1 PE=1 SV=1;tr|K	P04183;K7ERV3;K7ES52;K7ERJ1	31.245	P04183	TK1	Thymidine kinase, cytosolic	19.1341	20.0959	19.6784	18.9026	19.0063	19.1596	19.8938	19.5646	18.6712	18.7607	19.1346	19.8689	19.4017	18.471	18.696	0.810038	0.565087	1.05499	19.2293	7.11196	4.19211	6.14079e-06	0.000375502	0.405427	0.160476	0.650378	19.2293	3.55957	-2.10961	0.00327026	0.0175267	-0.461243	-0.706194	-0.216292	19.2293	-4.04961	-1.22514	0.00126112	0.0104535	-0.32178	-0.566731	-0.0768291	19.2293
2598	sp|O75874|IDHC_HUMAN Isocitrate dehydrogenase [NADP] cytoplasmic OS=Homo sapiens OX=9606 GN=IDH1 PE=1 SV=2	O75874	58.171	O75874	IDH1	Isocitrate dehydrogenase [NADP] cytoplasmic	22.7157	23.7207	23.5513	23.1659	21.7931	22.6967	23.4479	23.467	22.9341	21.5545	22.7011	23.3709	23.2569	22.7704	21.9337	0.808668	0.541921	1.07542	22.872	6.51979	3.25765	1.5581e-05	0.000665695	0.720594	0.453847	0.987341	22.872	5.80971	2.06801	5.06905e-05	0.0012618	0.252329	-0.0144181	0.519076	22.872	2.03437	-4.99851	0.0618862	0.16894	-0.944068	-1.21081	-0.677321	22.872
3815	sp|Q03169|TNAP2_HUMAN Tumor necrosis factor alpha-induced protein 2 OS=Homo sapiens OX=9606 GN=TNFAIP2 PE=1 SV=2	Q03169	32.974	Q03169	TNFAIP2	Tumor necrosis factor alpha-induced protein 2	18.3146	18.9935	18.0666	17.7801	18.0622	18.1237	19.0302	17.9758	17.7698	17.8408	18.1673	19.0048	17.7982	17.4818	17.2876	0.807613	0.4773	1.13793	18.1131	5.25825	1.0987	0.000132962	0.00218154	-0.255006	-0.585319	0.0753063	18.1131	-1.66031	-5.50961	0.119711	0.216535	-0.524642	-0.854955	-0.19433	18.1131	-3.41587	-2.45412	0.00433462	0.0252926	-0.471658	-0.801971	-0.141346	18.1131
3171	sp|P29401|TKT_HUMAN Transketolase OS=Homo sapiens OX=9606 GN=TKT PE=1 SV=3;tr|A0A0B4J1R6|A0A0B4J1R6_HUMAN Transketolase OS=Homo sapiens OX=9606 GN=TKT PE=1 SV=1;tr|E9PFF2|E9PFF2_HUMAN Transketolase OS=Homo sapiens OX=9606 GN=TKT PE=1 SV=1	P29401;A0A0B4J1R6;E9PFF2	84.813	P29401	TKT	Transketolase	25.0603	26.0202	25.882	25.3026	24.4802	25.0287	25.7969	25.9224	25.2077	24.1971	25.0557	25.7414	25.8211	25.0041	24.8712	0.804638	0.513976	1.0953	25.2928	5.95355	2.31666	3.9691e-05	0.00110822	0.826949	0.536287	1.11761	25.2928	6.11863	2.59369	3.00822e-05	0.000874581	0.12324	-0.167422	0.413901	25.2928	0.911857	-6.48776	0.377716	0.562901	-0.532081	-0.822743	-0.24142	25.2928
1983	tr|H7BZB9|H7BZB9_HUMAN Microtubule-associated protein 2 (Fragment) OS=Homo sapiens OX=9606 GN=MAP2 PE=1 SV=1	H7BZB9	1.7575	H7BZB9	MAP2	Microtubule-associated protein 2 (Fragment)	13.2477	14.354	14.1459	13.7035	13.1667	13.6355	13.8819	14.0391	13.1985	13.4191	13.2866	14.3419	14.0675	13.4701	13.1818	0.802659	0.480534	1.12478	13.676	5.35883	1.27901	0.000111171	0.00191792	0.694211	0.372087	1.01634	13.676	4.6348	-0.0500776	0.000415347	0.00469896	0.0674556	-0.254669	0.38958	13.676	0.450357	-6.80964	0.659545	0.789223	-0.13408	-0.456205	0.188044	13.676
3382	sp|P48431|SOX2_HUMAN Transcription factor SOX-2 OS=Homo sapiens OX=9606 GN=SOX2 PE=1 SV=1	P48431	14.191	P48431	SOX2	Transcription factor SOX-2	17.7719	18.6208	18.6637	18.8005	19.6133	17.9119	18.6197	18.737	18.8965	19.8109	17.8261	18.6685	18.8205	19.3065	19.6186	0.799673	0.565768	1.03358	18.7791	7.35252	4.55744	4.26293e-06	0.00029735	0.903773	0.669869	1.13768	18.7791	8.30966	5.93166	1.07196e-06	9.75026e-05	1.16452	0.93062	1.39843	18.7791	10.7071	8.89816	5.24399e-08	1.28397e-05	1.8443	1.6104	2.07821	18.7791
2753	sp|P00390|GSHR_HUMAN Glutathione reductase, mitochondrial OS=Homo sapiens OX=9606 GN=GSR PE=1 SV=2	P00390	55.83	P00390	GSR	Glutathione reductase, mitochondrial	22.2209	23.2871	23.1328	22.7667	22.0528	22.3608	23.1372	23.1555	22.4791	21.8036	22.2893	22.8324	22.9168	22.3943	22.1315	0.795248	0.51995	1.07055	22.5974	6.21245	2.75267	2.5741e-05	0.00089545	0.778042	0.502744	1.05334	22.5974	6.07804	2.52541	3.21927e-05	0.00090695	0.256365	-0.0189327	0.531663	22.5974	2.00271	-5.05065	0.0655478	0.176008	-0.294366	-0.569664	-0.0190684	22.5974
5494	sp|Q9BQC3|DPH2_HUMAN 2-(3-amino-3-carboxypropyl)histidine synthase subunit 2 OS=Homo sapiens OX=9606 GN=DPH2 PE=1 SV=1	Q9BQC3	2.0768	Q9BQC3	DPH2	2-(3-amino-3-carboxypropyl)histidine synthase subunit 2	11.9061	12.8259	12.7407	11.9399	12.1559	11.5749	12.5284	12.5244	12.1848	11.6884	12.1193	12.631	12.5199	11.7281	12.1452	0.794933	0.450758	1.13911	12.2142	4.96723	0.569605	0.000224878	0.00307223	0.728221	0.384046	1.0724	12.2142	4.55037	-0.208711	0.00048642	0.00519637	0.084152	-0.260023	0.428327	12.2142	0.525833	-6.77116	0.607468	0.751485	0.129715	-0.214459	0.47389	12.2142
1384	tr|E5RFJ1|E5RFJ1_HUMAN E3 SUMO-protein ligase NSE2 OS=Homo sapiens OX=9606 GN=NSMCE2 PE=1 SV=1;sp|Q96MF7|NSE2_HUMAN E3 SUMO-protein ligase NSE2 OS=Homo sapiens OX=9606 GN=NSMCE2 PE=1 SV=2	E5RFJ1;Q96MF7	4.3835	E5RFJ1	NSMCE2	E3 SUMO-protein ligase NSE2	11.5494	12.7961	12.3111	11.9656	11.8409	NA	11.8876	NA	12.122	12.4411	NA	NA	12.437	12.1423	12.3837	0.792433	0.0482447	1.53662	12.1706	2.38582	-4.04864	0.0391864	0.085461	0.824667	0.0804795	1.56886	12.1706	2.48287	-3.89683	0.0332785	0.086237	0.527207	-0.17442	1.22883	12.1706	1.68357	-5.23347	0.124418	0.273592	0.672464	-0.0291632	1.37409	12.1706
801	tr|A0A6Q8PHB5|A0A6Q8PHB5_HUMAN Cytosolic purine 5-nucleotidase OS=Homo sapiens OX=9606 GN=NT5C2 PE=1 SV=1;tr|A0A6Q8PHP0|A0A6Q8PHP0_HUMAN Cytosolic purine 5-nucleotidase OS=Homo sapiens OX=9606 GN=NT5C2 PE=1 SV=1;sp|P49902|5NTC_HUMAN Cytosolic purine 5-n	A0A6Q8PHB5;A0A6Q8PHP0;P49902;Q5JUV4	15.328	A0A6Q8PHB5	NT5C2	Cytosolic purine 5-nucleotidase	18.8981	19.8251	19.2202	18.7169	18.0024	18.8306	19.6516	19.0293	18.451	17.5376	18.722	19.3339	18.8256	18.1043	18.0514	0.786648	0.413317	1.15998	18.7467	4.53158	-0.241294	0.000503882	0.00492736	0.208124	-0.165207	0.581455	18.7467	1.19892	-6.11557	0.251021	0.370051	-0.392854	-0.766184	-0.0195227	18.7467	-2.26308	-4.60987	0.0405562	0.12533	-0.953082	-1.32641	-0.579751	18.7467
6423	sp|Q9Y3D8|KAD6_HUMAN Adenylate kinase isoenzyme 6 OS=Homo sapiens OX=9606 GN=AK6 PE=1 SV=1;tr|A0A087WY94|A0A087WY94_HUMAN Adenylate kinase isoenzyme 6 OS=Homo sapiens OX=9606 GN=AK6 PE=1 SV=1;tr|A0A087WVD7|A0A087WVD7_HUMAN Adenylate kinase isoenzyme 6 OS=H	Q9Y3D8;A0A087WY94;A0A087WVD7;D6RDH4	3.6685	Q9Y3D8	AK6	Adenylate kinase isoenzyme 6	16.161	16.923	16.5422	15.7104	15.5518	15.8593	16.6888	16.4842	15.6461	15.4299	16.0241	16.7909	16.152	15.7212	15.8785	0.786057	0.5165	1.05561	16.1042	6.27142	2.85062	2.33536e-05	0.000830553	0.377976	0.108418	0.647533	16.1042	3.01561	-3.15682	0.00951177	0.0358745	-0.322264	-0.591822	-0.0527068	16.1042	-2.57113	-4.05874	0.0225833	0.0824815	-0.394762	-0.66432	-0.125205	16.1042
3180	sp|P30041|PRDX6_HUMAN Peroxiredoxin-6 OS=Homo sapiens OX=9606 GN=PRDX6 PE=1 SV=3	P30041	59.812	P30041	PRDX6	Peroxiredoxin-6	22.562	23.5911	23.2651	22.7184	22.0643	22.5796	23.2531	23.0965	22.5923	21.897	22.5509	23.2042	22.9806	22.3772	22.6039	0.785311	0.44522	1.1254	22.7558	4.96602	0.567388	0.000225374	0.00307223	0.549877	0.209785	0.889969	22.7558	3.47722	-2.269	0.00384299	0.0193625	-0.00153909	-0.341631	0.338553	22.7558	-0.00973266	-6.9166	0.992376	0.995974	-0.375747	-0.715839	-0.0356548	22.7558
4946	sp|Q8ND30|LIPB2_HUMAN Liprin-beta-2 OS=Homo sapiens OX=9606 GN=PPFIBP2 PE=1 SV=3	Q8ND30	8.227	Q8ND30	PPFIBP2	Liprin-beta-2	10.667	11.5055	12.0746	11.9521	10.7521	10.366	11.3238	11.9162	12.5158	10.8278	10.8011	11.343	11.5972	12.1091	11.1869	0.77939	0.422378	1.1364	11.3959	4.69499	0.0653294	0.000371298	0.0041541	1.2513	0.89429	1.60831	11.3959	7.53776	4.83197	3.23478e-06	0.000212328	1.58096	1.22395	1.93797	11.3959	9.52361	7.5043	2.16467e-07	2.99571e-05	0.310894	-0.0461178	0.667906	11.3959
3778	sp|Q00796|DHSO_HUMAN Sorbitol dehydrogenase OS=Homo sapiens OX=9606 GN=SORD PE=1 SV=4;tr|A0A6I8PIS1|A0A6I8PIS1_HUMAN Sorbitol dehydrogenase OS=Homo sapiens OX=9606 GN=SORD PE=1 SV=1	Q00796;A0A6I8PIS1	40.575	Q00796	SORD	Sorbitol dehydrogenase	20.8444	21.8246	21.4292	20.9783	20.5221	20.8505	21.5936	21.3384	20.8028	20.2152	20.913	21.5203	21.0897	20.4801	20.6968	0.776834	0.472202	1.08147	21.0066	5.48423	1.50191	8.9107e-05	0.00167688	0.41643	0.111798	0.721062	21.0066	2.93988	-3.30069	0.0110325	0.0399341	-0.115612	-0.420244	0.18902	21.0066	-0.816191	-6.57101	0.428449	0.607192	-0.391304	-0.695936	-0.0866718	21.0066
2636	sp|O94855|SC24D_HUMAN Protein transport protein Sec24D OS=Homo sapiens OX=9606 GN=SEC24D PE=1 SV=2;tr|E9PC44|E9PC44_HUMAN Protein transport protein Sec24D OS=Homo sapiens OX=9606 GN=SEC24D PE=1 SV=2;tr|E9PDM8|E9PDM8_HUMAN Protein transport protein Sec24D O	O94855;E9PC44;E9PDM8	11.665	O94855	SEC24D	Protein transport protein Sec24D	16.855	17.63	17.0318	16.9884	16.5911	16.8494	17.7219	17.0633	17.1705	16.3461	16.8386	17.5137	16.9569	16.4711	16.5164	0.774209	0.484456	1.06396	16.9696	5.74636	1.9608	5.65082e-05	0.00133729	0.169677	-0.120076	0.459431	16.9696	1.25938	-6.04466	0.229067	0.346506	0.0289873	-0.260766	0.318741	16.9696	0.21515	-6.89209	0.832842	0.90299	-0.363122	-0.652876	-0.0733684	16.9696
3041	sp|P19012|K1C15_HUMAN Keratin, type I cytoskeletal 15 OS=Homo sapiens OX=9606 GN=KRT15 PE=1 SV=3	P19012	3.0818	P19012	KRT15	Keratin, type I cytoskeletal 15	17.3584	17.7453	18.5174	18.1144	19.0348	16.6112	18.2901	17.7699	18.5011	18.3091	17.3512	17.6077	18.4246	18.3746	17.6502	0.774109	0.0932044	1.45501	17.9773	2.445	-4.213	0.0287543	0.0688935	1.13039	0.449485	1.81129	17.9773	3.5703	-2.08882	0.00320224	0.0172639	1.22311	0.542204	1.90401	17.9773	3.86315	-1.58585	0.00180884	0.0134679	1.22445	0.543544	1.90535	17.9773
2272	sp|O00625|PIR_HUMAN Pirin OS=Homo sapiens OX=9606 GN=PIR PE=1 SV=1	O00625	25.489	O00625	PIR	Pirin	21.0566	21.9968	22.1116	21.599	20.8784	20.893	21.6895	22.0995	21.4491	20.6985	21.0013	21.5804	21.8603	21.3636	21.3345	0.771893	0.456705	1.08708	21.4408	5.26684	1.11415	0.000130939	0.00216508	1.04014	0.72495	1.35533	21.4408	7.09715	4.16779	6.28194e-06	0.000330555	0.486903	0.171714	0.802091	21.4408	3.32227	-2.63544	0.00520925	0.0289625	-0.013221	-0.32841	0.301968	21.4408
3363	sp|P46821|MAP1B_HUMAN Microtubule-associated protein 1B OS=Homo sapiens OX=9606 GN=MAP1B PE=1 SV=2	P46821	98.819	P46821	MAP1B	Microtubule-associated protein 1B	20.5311	21.4083	21.3277	21.0144	20.6778	20.5259	21.2883	21.3433	20.9635	20.6531	20.5631	21.232	21.209	20.5961	19.5908	0.769504	0.305516	1.23349	20.8616	3.5667	-2.09262	0.00322489	0.0157436	0.75332	0.289332	1.21731	20.8616	3.49169	-2.241	0.0037355	0.0189968	0.317981	-0.146007	0.781969	20.8616	1.47386	-5.84613	0.163275	0.325204	-0.232779	-0.696767	0.23121	20.8616
2740	sp|Q9NZH5|PTTG2_HUMAN Securin-2 OS=Homo sapiens OX=9606 GN=PTTG2 PE=1 SV=2;sp|O95997|PTTG1_HUMAN Securin OS=Homo sapiens OX=9606 GN=PTTG1 PE=1 SV=1	Q9NZH5;O95997	2.513	Q9NZH5	PTTG2	Securin-2	15.0993	16.0533	15.8019	15.1749	14.6892	15.1061	15.8288	15.7625	15.0728	14.7136	15.0501	15.675	15.4147	14.8625	14.8404	0.767211	0.516751	1.01767	15.2763	6.5878	3.36753	1.39672e-05	0.000626165	0.574549	0.32409	0.825008	15.2763	4.93348	0.504896	0.000239181	0.00329625	-0.0484339	-0.298893	0.202025	15.2763	-0.415887	-6.82529	0.683977	0.805587	-0.337431	-0.58789	-0.0869714	15.2763
1209	tr|C9J712|C9J712_HUMAN Profilin OS=Homo sapiens OX=9606 GN=PFN2 PE=1 SV=1;sp|P35080|PROF2_HUMAN Profilin-2 OS=Homo sapiens OX=9606 GN=PFN2 PE=1 SV=3;tr|C9J2N0|C9J2N0_HUMAN Profilin OS=Homo sapiens OX=9606 GN=PFN2 PE=1 SV=1	C9J712;P35080;C9J2N0	5.7256	C9J712	PFN2	Profilin	19.1024	20.0599	19.911	19.5653	18.9905	19.1033	19.746	19.9381	19.3404	18.9786	19.1762	19.8629	19.7853	19.5152	20.0058	0.762263	0.326416	1.19811	19.5387	3.76127	-1.716	0.00220521	0.0123252	0.750816	0.31497	1.18666	19.5387	3.70479	-1.82841	0.00246194	0.0144605	0.346337	-0.089509	0.782183	19.5387	1.70895	-5.51163	0.110158	0.251349	0.197642	-0.238204	0.633488	19.5387
4157	sp|Q15398|DLGP5_HUMAN Disks large-associated protein 5 OS=Homo sapiens OX=9606 GN=DLGAP5 PE=1 SV=2	Q15398	18.564	Q15398	DLGAP5	Disks large-associated protein 5	17.3981	18.2519	17.8861	17.2758	17.8416	17.3588	18.1167	17.9381	17.3162	17.7252	17.4373	18.1091	17.7447	17.0956	17.4448	0.761185	0.551201	0.971168	17.6627	7.79592	5.20975	2.21782e-06	0.000216456	0.458268	0.248285	0.668252	17.6627	4.6935	0.0597895	0.000372328	0.00441895	-0.168837	-0.378821	0.0411467	17.6627	-1.7292	-5.48128	0.106382	0.244641	0.272477	0.0624935	0.482461	17.6627
2795	sp|P04818|TYSY_HUMAN Thymidylate synthase OS=Homo sapiens OX=9606 GN=TYMS PE=1 SV=3	P04818	9.9815	P04818	TYMS	Thymidylate synthase	16.0741	17.0404	16.6695	16.1616	16.6361	16.0094	16.581	16.6908	16.2699	16.4237	16.0722	16.8009	16.5354	16.0324	16.6014	0.755514	0.529945	0.981083	16.4399	7.20321	4.33165	5.34207e-06	0.000340076	0.579971	0.354402	0.80554	16.4399	5.52956	1.57955	8.23031e-05	0.00173518	0.102712	-0.122856	0.328281	16.4399	0.97928	-6.4242	0.344533	0.531451	0.501787	0.276219	0.727356	16.4399
2277	sp|O00762|UBE2C_HUMAN Ubiquitin-conjugating enzyme E2 C OS=Homo sapiens OX=9606 GN=UBE2C PE=1 SV=1;tr|A0A0A0MSE8|A0A0A0MSE8_HUMAN Ubiquitin-conjugating enzyme E2 C OS=Homo sapiens OX=9606 GN=UBE2C PE=1 SV=1;tr|A0A087WVK1|A0A087WVK1_HUMAN Ubiquitin-conjugat	O00762;A0A0A0MSE8;A0A087WVK1	8.7938	O00762	UBE2C	Ubiquitin-conjugating enzyme E2 C	18.76	19.631	19.1839	18.2605	18.9799	18.6575	19.4641	19.1211	18.159	18.6553	18.8242	19.4109	19.1338	18.2221	19.2228	0.754752	0.513009	0.996495	18.9124	6.7145	3.57046	1.14125e-05	0.000550392	0.39898	0.157237	0.640723	18.9124	3.54945	-2.1292	0.00333572	0.0177613	-0.533377	-0.77512	-0.291634	18.9124	-4.74508	0.0985696	0.000338341	0.00415806	0.205418	-0.0363249	0.447161	18.9124
2994	sp|P16152|CBR1_HUMAN Carbonyl reductase [NADPH] 1 OS=Homo sapiens OX=9606 GN=CBR1 PE=1 SV=3	P16152	50.469	P16152	CBR1	Carbonyl reductase [NADPH] 1	21.3924	22.3907	22.5513	21.9363	21.3318	21.4437	22.1194	22.3738	21.7315	21.042	21.4814	22.0679	22.2544	21.611	21.4517	0.753534	0.493067	1.014	21.812	6.22176	2.76817	2.53476e-05	0.000891507	0.953992	0.693525	1.21446	21.812	7.87689	5.32491	1.97354e-06	0.00014959	0.32043	0.0599634	0.580898	21.812	2.64572	-3.92151	0.0195575	0.0743691	-0.163973	-0.42444	0.0964945	21.812
1794	tr|G5E9C5|G5E9C5_HUMAN Phosphodiesterase OS=Homo sapiens OX=9606 GN=PDE5A PE=1 SV=1;sp|O76074|PDE5A_HUMAN cGMP-specific 3,5-cyclic phosphodiesterase OS=Homo sapiens OX=9606 GN=PDE5A PE=1 SV=2	G5E9C5;O76074	4.7032	G5E9C5	PDE5A	Phosphodiesterase	12.528	13.6233	13.4461	13.4382	12.5063	12.5111	13.0285	13.6716	13.1177	12.4168	12.561	13.2025	13.4024	13.4322	13.671	0.751419	0.203616	1.29922	13.1038	2.94999	-3.27818	0.0108164	0.0342232	0.973337	0.425534	1.52114	13.1038	3.82122	-1.60316	0.00196235	0.0124943	0.796028	0.248226	1.34383	13.1038	3.12513	-3.01566	0.00767279	0.03837	0.331342	-0.216461	0.879144	13.1038
3142	sp|P26583|HMGB2_HUMAN High mobility group protein B2 OS=Homo sapiens OX=9606 GN=HMGB2 PE=1 SV=2;tr|D6R9A6|D6R9A6_HUMAN High mobility group protein B2 (Fragment) OS=Homo sapiens OX=9606 GN=HMGB2 PE=1 SV=1	P26583;D6R9A6	4.6048	P26583	HMGB2	High mobility group protein B2	19.6769	20.6334	20.3044	19.765	19.7224	19.6227	20.3436	20.5283	19.6683	19.7038	19.7108	20.2825	20.2951	19.8272	20.2515	0.749745	0.462892	1.0366	20.0224	5.62105	1.74264	7.01699e-05	0.00149402	0.705825	0.418972	0.992677	20.0224	5.29177	1.15645	0.000125243	0.00225899	0.0834057	-0.203447	0.370258	20.0224	0.625317	-6.71175	0.542109	0.701668	0.222444	-0.0644085	0.509297	20.0224
989	tr|A6PVN5|A6PVN5_HUMAN Serine/threonine-protein phosphatase 2A activator OS=Homo sapiens OX=9606 GN=PTPA PE=1 SV=1;sp|Q15257|PTPA_HUMAN Serine/threonine-protein phosphatase 2A activator OS=Homo sapiens OX=9606 GN=PTPA PE=1 SV=3;tr|F6WIT2|F6WIT2_HUMAN Serin	A6PVN5;Q15257;F6WIT2;Q68CR8;Q5T949	26.737	A6PVN5	PTPA	Serine/threonine-protein phosphatase 2A activator	20.46	21.4043	21.3341	20.8723	20.1793	20.5214	21.2042	21.197	20.814	20.0266	20.5405	21.1542	21.1374	20.5198	20.6582	0.746899	0.447612	1.04619	20.8016	5.36706	1.2937	0.000109562	0.00190047	0.715525	0.416237	1.01481	20.8016	5.14161	0.885375	0.000163912	0.00261562	0.228083	-0.0712044	0.52737	20.8016	1.63896	-5.61471	0.124128	0.273143	-0.219277	-0.518564	0.0800109	20.8016
3012	sp|P17174|AATC_HUMAN Aspartate aminotransferase, cytoplasmic OS=Homo sapiens OX=9606 GN=GOT1 PE=1 SV=3	P17174	38.426	P17174	GOT1	Aspartate aminotransferase, cytoplasmic	21.069	22.0745	21.9259	21.5073	20.4783	21.0646	21.7584	21.8487	21.0801	20.2738	21.1602	21.6871	21.6822	21.1358	21.0734	0.742062	0.366415	1.11771	21.3213	4.24838	-0.778706	0.000861418	0.00682913	0.720988	0.345341	1.09664	21.3213	4.12773	-1.0126	0.0010852	0.00859388	0.143127	-0.23252	0.518774	21.3213	0.819415	-6.56834	0.42667	0.605614	-0.489453	-0.8651	-0.113806	21.3213
2883	sp|P09936|UCHL1_HUMAN Ubiquitin carboxyl-terminal hydrolase isozyme L1 OS=Homo sapiens OX=9606 GN=UCHL1 PE=1 SV=2;tr|D6RE83|D6RE83_HUMAN Ubiquitin carboxyl-terminal hydrolase OS=Homo sapiens OX=9606 GN=UCHL1 PE=1 SV=1;tr|D6R956|D6R956_HUMAN Ubiquitin carbo	P09936;D6RE83;D6R956;D6R974	40.879	P09936	UCHL1	Ubiquitin carboxyl-terminal hydrolase isozyme L1	23.0954	24.0616	24.0166	23.3875	22.665	23.2199	23.8572	23.9699	23.1785	22.3935	23.1536	23.7752	23.5853	23.0001	22.8173	0.74173	0.448879	1.03458	23.3451	5.44706	1.43605	9.51259e-05	0.00176038	0.700968	0.408117	0.99382	23.3451	5.14771	0.896449	0.00016212	0.00260491	0.03244	-0.260411	0.325291	23.3451	0.23823	-6.88655	0.815253	0.892197	-0.530997	-0.823848	-0.238146	23.3451
3489	sp|P52209|6PGD_HUMAN 6-phosphogluconate dehydrogenase, decarboxylating OS=Homo sapiens OX=9606 GN=PGD PE=1 SV=3;tr|K7EM49|K7EM49_HUMAN Phosphogluconate dehydrogenase (NADP(+)-dependent, decarboxylating) (Fragment) OS=Homo sapiens OX=9606 GN=PGD PE=1 SV=1;t	P52209;K7EM49;K7EMN2;K7EPF6	51.666	P52209	PGD	6-phosphogluconate dehydrogenase, decarboxylating	23.1976	24.1331	24.1821	23.6334	22.8299	23.1434	23.8323	24.1304	23.5223	22.616	23.2153	23.8119	23.883	23.3123	23.1988	0.740327	0.441766	1.03889	23.5095	5.33278	1.23244	0.000116431	0.00198963	0.879722	0.581161	1.17828	23.5095	6.33688	2.95678	2.09736e-05	0.000688345	0.303905	0.00534402	0.602466	23.5095	2.18911	-4.73774	0.0465572	0.13838	-0.303885	-0.602446	-0.00532428	23.5095
1148	tr|B7ZC38|B7ZC38_HUMAN Endophilin-B2 OS=Homo sapiens OX=9606 GN=SH3GLB2 PE=1 SV=1;sp|Q9NR46|SHLB2_HUMAN Endophilin-B2 OS=Homo sapiens OX=9606 GN=SH3GLB2 PE=1 SV=1;tr|B7ZC39|B7ZC39_HUMAN Endophilin-B2 OS=Homo sapiens OX=9606 GN=SH3GLB2 PE=1 SV=1	B7ZC38;Q9NR46;B7ZC39	20.59	B7ZC38	SH3GLB2	Endophilin-B2	19.966	20.9388	20.7274	20.2456	19.3704	19.9003	20.5944	20.6155	20.0126	19.1997	20.0309	20.5798	20.4582	19.7648	19.7471	0.738586	0.419963	1.05721	20.1434	4.98525	0.602678	0.000217608	0.00303127	0.63464	0.316017	0.953263	20.1434	4.28364	-0.714334	0.000805408	0.00710758	0.0418875	-0.276736	0.360511	20.1434	0.282729	-6.87429	0.78164	0.87144	-0.526682	-0.845305	-0.208059	20.1434
3225	sp|P32456|GBP2_HUMAN Guanylate-binding protein 2 OS=Homo sapiens OX=9606 GN=GBP2 PE=1 SV=3	P32456	13.252	P32456	GBP2	Guanylate-binding protein 2	17.4051	18.3323	18.2601	17.6161	16.2206	17.4037	18.1933	18.1924	17.6441	15.7432	17.4085	17.906	17.9369	16.9124	15.8543	0.73809	0.348722	1.12746	17.4019	4.07673	-1.10752	0.00119696	0.00836897	0.724018	0.33465	1.11339	17.4019	3.99901	-1.26004	0.00139043	0.00998569	-0.0148978	-0.404265	0.37447	17.4019	-0.082286	-6.91305	0.935618	0.967009	-1.46643	-1.8558	-1.07706	17.4019
569	tr|A0A2R8YDT1|A0A2R8YDT1_HUMAN Glutamine synthetase OS=Homo sapiens OX=9606 GN=GLUL PE=1 SV=1;sp|P15104|GLNA_HUMAN Glutamine synthetase OS=Homo sapiens OX=9606 GN=GLUL PE=1 SV=4	A0A2R8YDT1;P15104	19.698	A0A2R8YDT1	GLUL	Glutamine synthetase	19.9686	20.792	20.5815	20.2489	19.1906	19.8359	20.6304	20.692	20.1726	19.0159	19.975	20.5669	20.3675	20.0272	19.6294	0.736588	0.448324	1.02485	20.113	5.49537	1.5216	8.73823e-05	0.00166053	0.620465	0.3322	0.908729	20.113	4.62902	-0.0609066	0.000419849	0.00472611	0.223081	-0.0651836	0.511345	20.113	1.66431	-5.5777	0.118899	0.264932	-0.647852	-0.936116	-0.359588	20.113
2974	sp|P14635|CCNB1_HUMAN G2/mitotic-specific cyclin-B1 OS=Homo sapiens OX=9606 GN=CCNB1 PE=1 SV=1;tr|E9PC90|E9PC90_HUMAN G2/mitotic-specific cyclin-B1 (Fragment) OS=Homo sapiens OX=9606 GN=CCNB1 PE=1 SV=1	P14635;E9PC90	8.1637	P14635	CCNB1	G2/mitotic-specific cyclin-B1	18.054	18.7799	18.2868	17.8577	18.0995	18.025	18.7261	18.3699	17.4979	18.1445	18.1273	18.8929	18.229	17.6733	17.7392	0.730861	0.497026	0.964695	18.1669	6.72186	3.58218	1.12801e-05	0.000550392	0.226482	-0.00735249	0.460316	18.1669	2.08299	-4.845	0.0566278	0.125715	-0.392434	-0.626268	-0.1586	18.1669	-3.60929	-2.07864	0.002967	0.019486	-0.0743371	-0.308171	0.159497	18.1669
6346	sp|Q9Y223|GLCNE_HUMAN Bifunctional UDP-N-acetylglucosamine 2-epimerase/N-acetylmannosamine kinase OS=Homo sapiens OX=9606 GN=GNE PE=1 SV=1;tr|A0A7I2SU25|A0A7I2SU25_HUMAN Bifunctional UDP-N-acetylglucosamine 2-epimerase/N-acetylmannosamine kinase OS=Homo sa	Q9Y223;A0A7I2SU25	11.325	Q9Y223	GNE	Bifunctional UDP-N-acetylglucosamine 2-epimerase/N-acetylmannosamine kinase	17.235	18.1089	17.6402	17.1329	16.7506	17.0884	17.8283	17.616	17.0531	16.4566	17.2799	17.8501	17.2833	16.8334	16.7782	0.727988	0.463882	0.992095	17.2623	5.92801	2.27313	4.1444e-05	0.00114019	0.312023	0.0479172	0.57613	17.2623	2.54081	-4.04333	0.0239386	0.0682566	-0.194645	-0.458751	0.0694617	17.2623	-1.58499	-5.69222	0.135927	0.288342	-0.539295	-0.803401	-0.275188	17.2623
3053	sp|P19971|TYPH_HUMAN Thymidine phosphorylase OS=Homo sapiens OX=9606 GN=TYMP PE=1 SV=2;tr|C9JGI3|C9JGI3_HUMAN Thymidine phosphorylase (Fragment) OS=Homo sapiens OX=9606 GN=TYMP PE=1 SV=1;tr|A0A494C0L6|A0A494C0L6_HUMAN Thymidine phosphorylase (Fragment) OS=	P19971;C9JGI3;A0A494C0L6	66.867	P19971	TYMP	Thymidine phosphorylase	22.2962	23.2782	23.0965	22.3611	20.5608	22.2488	22.9197	23.054	21.8085	20.0063	22.2874	22.8101	22.8771	21.2197	19.7913	0.725228	0.211889	1.23857	22.041	3.03832	-3.11024	0.00909771	0.0306618	0.731785	0.218445	1.24512	22.041	3.06578	-3.06113	0.00862051	0.0336879	-0.481032	-0.994371	0.0323079	22.041	-2.01526	-5.03003	0.0640732	0.173202	-2.15799	-2.67133	-1.64465	22.041
2913	sp|P10909|CLUS_HUMAN Clusterin OS=Homo sapiens OX=9606 GN=CLU PE=1 SV=1;tr|E7ERK6|E7ERK6_HUMAN Clusterin (Fragment) OS=Homo sapiens OX=9606 GN=CLU PE=1 SV=1;tr|H0YLK8|H0YLK8_HUMAN Clusterin (Fragment) OS=Homo sapiens OX=9606 GN=CLU PE=1 SV=1;tr|E7ETB4|E7ET	P10909;E7ERK6;H0YLK8;E7ETB4	18.606	P10909	CLU	Clusterin	18.6295	19.3695	19.4833	19.8661	18.411	18.6891	19.4244	19.5531	19.9296	18.4672	18.6914	19.3883	19.4705	19.553	18.2899	0.724065	0.537585	0.910544	19.1477	8.35042	5.98831	1.01322e-06	0.000131636	0.832308	0.645828	1.01879	19.1477	9.59876	7.60024	1.97052e-07	3.69009e-05	1.11293	0.926445	1.29941	19.1477	12.835	11.0708	5.48565e-09	3.49216e-06	-0.280616	-0.467096	-0.0941364	19.1477
1	tr|A0A024QZP7|A0A024QZP7_HUMAN Cell division cycle 2, G1 to S and G2 to M, isoform CRA_a OS=Homo sapiens OX=9606 GN=CDK1 PE=1 SV=1;sp|P06493|CDK1_HUMAN Cyclin-dependent kinase 1 OS=Homo sapiens OX=9606 GN=CDK1 PE=1 SV=3;tr|E5RIU6|E5RIU6_HUMAN Cyclin-depend	A0A024QZP7;P06493;E5RIU6;A0A087WZZ9	27.133	A0A024QZP7	CDK1	Cell division cycle 2, G1 to S and G2 to M, isoform CRA_a	19.974	20.7958	20.4587	19.8	20.0053	19.8282	20.6462	20.3085	19.6664	19.8319	20.0039	20.5357	20.2592	19.7725	20.1842	0.723869	0.514672	0.933065	20.138	7.44164	4.69072	3.73085e-06	0.000284414	0.406709	0.197513	0.615906	20.138	4.18112	-0.910255	0.000979598	0.00807915	-0.189092	-0.398288	0.0201047	20.138	-1.94393	-5.14626	0.0728774	0.189662	0.0717303	-0.137466	0.280927	20.138
6252	sp|Q9UKE5|TNIK_HUMAN TRAF2 and NCK-interacting protein kinase OS=Homo sapiens OX=9606 GN=TNIK PE=1 SV=1	Q9UKE5	2.2366	Q9UKE5	TNIK	TRAF2 and NCK-interacting protein kinase	10.0099	11.0748	11.2993	10.7754	11.173	10.2274	11.3131	11.507	11.3529	10.704	10.1318	10.1483	11.0899	10.4227	10.4907	0.722367	0.120124	1.32461	10.7813	2.57958	-3.96916	0.0222188	0.0572189	1.17568	0.573438	1.77792	10.7813	4.19837	-0.877239	0.000947788	0.00789864	0.727284	0.125042	1.32953	10.7813	2.59714	-4.01103	0.0214798	0.0795189	0.66618	0.0639382	1.26842	10.7813
2834	tr|Q5JP53|Q5JP53_HUMAN Tubulin beta chain OS=Homo sapiens OX=9606 GN=TUBB PE=1 SV=1;sp|P07437|TBB5_HUMAN Tubulin beta chain OS=Homo sapiens OX=9606 GN=TUBB PE=1 SV=2;tr|Q5ST81|Q5ST81_HUMAN Tubulin beta chain OS=Homo sapiens OX=9606 GN=TUBB PE=1 SV=1	Q5JP53;P07437;Q5ST81	28.667	Q5JP53	TUBB	Tubulin beta chain	22.8542	23.6945	23.4509	22.7948	22.2887	22.6139	23.478	23.3465	22.394	22.0716	22.8023	23.2609	23.1927	22.4167	22.5226	0.721005	0.415973	1.02604	22.8788	5.08342	0.782129	0.000182075	0.00268931	0.573241	0.268209	0.878274	22.8788	4.04161	-1.17804	0.00128072	0.00951501	-0.221646	-0.526679	0.0833859	22.8788	-1.56271	-5.7237	0.141073	0.29532	-0.462508	-0.767541	-0.157476	22.8788
6216	sp|Q9UII4|HERC5_HUMAN E3 ISG15--protein ligase HERC5 OS=Homo sapiens OX=9606 GN=HERC5 PE=1 SV=2;tr|E9PBL0|E9PBL0_HUMAN E3 ISG15--protein ligase HERC5 OS=Homo sapiens OX=9606 GN=HERC5 PE=1 SV=1	Q9UII4;E9PBL0	37.84	Q9UII4	HERC5	E3 ISG15--protein ligase HERC5	20.1211	20.8545	20.5175	19.8525	18.0435	19.9397	20.7522	20.3544	19.4035	17.6903	20.0945	20.7065	20.5332	19.5401	18.2404	0.719317	0.433939	1.00469	19.7763	5.4208	1.38942	9.96317e-05	0.0018005	0.416593	0.131215	0.70197	19.7763	3.13946	-2.92016	0.00745988	0.0303302	-0.453027	-0.738405	-0.16765	19.7763	-3.41403	-2.45768	0.00435026	0.02533	-2.06034	-2.34572	-1.77497	19.7763
3071	sp|P21266|GSTM3_HUMAN Glutathione S-transferase Mu 3 OS=Homo sapiens OX=9606 GN=GSTM3 PE=1 SV=3;tr|A0A0A0MTN3|A0A0A0MTN3_HUMAN Glutathione S-transferase OS=Homo sapiens OX=9606 GN=GSTM3 PE=1 SV=1	P21266;A0A0A0MTN3	4.44	P21266	GSTM3	Glutathione S-transferase Mu 3	17.0464	18.1029	18.7797	19.0317	18.7218	17.4156	18.0406	18.6309	19.5167	18.6723	17.3154	17.7793	18.7876	19.4144	18.9185	0.715154	0.429594	1.00071	18.4116	5.38598	1.32745	0.000105953	0.00186325	1.47362	1.18806	1.75918	18.4116	11.0981	9.30801	3.37368e-08	1.79002e-05	2.0618	1.77624	2.34736	18.4116	15.5279	13.3289	4.80209e-10	2.14203e-06	1.51175	1.22619	1.79731	18.4116
2722	sp|O95786|DDX58_HUMAN Antiviral innate immune response receptor RIG-I OS=Homo sapiens OX=9606 GN=DDX58 PE=1 SV=2;tr|B3KWW1|B3KWW1_HUMAN RNA helicase OS=Homo sapiens OX=9606 GN=DDX58 PE=2 SV=1;tr|A0A7P0TB70|A0A7P0TB70_HUMAN Uncharacterized protein OS=Homo s	O95786;B3KWW1;A0A7P0TB70;A2A376;A0A7P0T9I8	38.525	O95786	DDX58	Antiviral innate immune response receptor RIG-I	21.2438	22.0819	21.6016	20.6977	19.34	21.0955	21.838	21.42	20.1062	18.5285	21.2169	21.7817	21.3102	19.5627	18.8688	0.715133	0.208838	1.22143	20.7129	3.03771	-3.11139	0.00910854	0.0306799	0.258535	-0.24776	0.76483	20.7129	1.09819	-6.22738	0.291174	0.411796	-1.06319	-1.56948	-0.556893	20.7129	-4.51616	-0.332381	0.000518693	0.00554026	-2.27297	-2.77926	-1.76667	20.7129
766	tr|I3L3X9|I3L3X9_HUMAN 2-(3-amino-3-carboxypropyl)histidine synthase subunit 1 (Fragment) OS=Homo sapiens OX=9606 GN=DPH1 PE=1 SV=1;tr|I3L1H5|I3L1H5_HUMAN 2-(3-amino-3-carboxypropyl)histidine synthase OS=Homo sapiens OX=9606 GN=DPH1 PE=1 SV=2;tr|A0A6Q8JGF9	I3L3X9;I3L1H5;A0A6Q8JGF9;Q9BZG8	1.8496	I3L3X9	DPH1	2-(3-amino-3-carboxypropyl)histidine synthase subunit 1 (Fragment)	14.9517	15.7069	15.578	15.0656	15.119	14.9051	15.6884	15.3912	15.0951	14.872	14.977	15.5701	15.5139	14.9761	15.517	0.710526	0.450238	0.970815	15.2618	5.87067	2.17506	4.56824e-05	0.00120106	0.549783	0.289495	0.810072	15.2618	4.54254	-0.223451	0.000493615	0.00523163	0.100976	-0.159312	0.361265	15.2618	0.834311	-6.55588	0.418513	0.599517	0.22473	-0.0355584	0.485019	15.2618
3259	sp|P35754|GLRX1_HUMAN Glutaredoxin-1 OS=Homo sapiens OX=9606 GN=GLRX PE=1 SV=2	P35754	22.287	P35754	GLRX	Glutaredoxin-1	17.5162	18.3141	18.1303	17.5523	16.3904	17.3999	18.1822	18.0171	17.4081	16.1819	17.5188	18.0584	17.6869	17.1314	16.7491	0.706592	0.386564	1.02662	17.4825	4.74835	0.164839	0.000336296	0.00389956	0.466489	0.146461	0.786518	17.4825	3.13485	-2.929	0.00752775	0.0305282	-0.11437	-0.434398	0.205659	17.4825	-0.768572	-6.60934	0.455281	0.629112	-1.03782	-1.35785	-0.717791	17.4825
2669	sp|O95235|KI20A_HUMAN Kinesin-like protein KIF20A OS=Homo sapiens OX=9606 GN=KIF20A PE=1 SV=1	O95235	39.759	O95235	KIF20A	Kinesin-like protein KIF20A	19.308	20.044	19.6068	19.3962	19.9992	19.3522	20.0675	19.6844	19.5141	19.9549	19.362	20.0258	19.5424	19.5129	19.5329	0.705022	0.491035	0.919008	19.6602	7.08564	4.15164	6.39393e-06	0.000380644	0.270423	0.0564364	0.48441	19.6602	2.71782	-3.71768	0.0170087	0.0536644	0.133642	-0.0803446	0.347628	19.6602	1.34313	-6.0167	0.201204	0.37507	0.488261	0.274274	0.702247	19.6602
511	sp|P31350|RIR2_HUMAN Ribonucleoside-diphosphate reductase subunit M2 OS=Homo sapiens OX=9606 GN=RRM2 PE=1 SV=1;tr|A0A286YFD6|A0A286YFD6_HUMAN Ribonucleoside-diphosphate reductase subunit M2 OS=Homo sapiens OX=9606 GN=RRM2 PE=1 SV=1;tr|A0A7P0SBL1|A0A7P0SBL1	P31350;A0A286YFD6;A0A7P0SBL1	29.207	P31350	RRM2	Ribonucleoside-diphosphate reductase subunit M2	20.5547	21.465	20.9916	20.3689	19.6249	20.5179	21.1573	20.9723	20.2217	19.4089	20.5872	21.1521	20.693	19.921	19.5855	0.704877	0.443763	0.965991	20.4815	5.80559	2.06317	5.10488e-05	0.00124701	0.332375	0.0712607	0.593489	20.4815	2.73754	-3.68098	0.0163697	0.0523543	-0.382743	-0.643857	-0.121629	20.4815	-3.15239	-2.96326	0.00727284	0.036844	-1.01349	-1.2746	-0.752372	20.4815
2546	sp|O75330|HMMR_HUMAN Hyaluronan mediated motility receptor OS=Homo sapiens OX=9606 GN=HMMR PE=1 SV=2	O75330	10.655	O75330	HMMR	Hyaluronan mediated motility receptor	18.0464	18.7291	18.3098	18.0191	18.2971	17.9804	18.7157	18.3581	17.8356	18.2843	18.0983	18.7926	18.2664	17.9555	18.1766	0.70408	0.56248	0.845679	18.2577	10.6936	8.86876	5.32595e-08	1.88361e-05	0.269723	0.128124	0.411323	18.2577	4.09656	-1.07243	0.00115217	0.00886251	-0.104966	-0.246565	0.0366341	18.2577	-1.59422	-5.67909	0.133844	0.28591	0.210947	0.069347	0.352546	18.2577
2991	tr|Q5TD07|Q5TD07_HUMAN Ribosyldihydronicotinamide dehydrogenase [quinone] OS=Homo sapiens OX=9606 GN=NQO2 PE=1 SV=1;sp|P16083|NQO2_HUMAN Ribosyldihydronicotinamide dehydrogenase [quinone] OS=Homo sapiens OX=9606 GN=NQO2 PE=1 SV=5	Q5TD07;P16083	2.9916	Q5TD07	NQO2	Ribosyldihydronicotinamide dehydrogenase [quinone]	14.8436	15.6718	15.7558	15.4093	14.4753	14.9431	15.6076	15.7831	15.5018	14.1149	14.9405	15.5598	15.6472	15.2062	15.1071	0.703969	0.328798	1.07914	15.2378	4.0354	-1.18698	0.00129615	0.00884381	0.819648	0.444476	1.19482	15.2378	4.69851	0.0691414	0.00036888	0.00440193	0.463383	0.0882117	0.838555	15.2378	2.65628	-3.90199	0.0191623	0.0733979	-0.343334	-0.718506	0.0318375	15.2378
4835	sp|Q8IYB5|SMAP1_HUMAN Stromal membrane-associated protein 1 OS=Homo sapiens OX=9606 GN=SMAP1 PE=1 SV=2;tr|A0A087X1X9|A0A087X1X9_HUMAN Stromal membrane-associated protein 1 OS=Homo sapiens OX=9606 GN=SMAP1 PE=1 SV=1	Q8IYB5;A0A087X1X9	2.734	Q8IYB5	SMAP1	Stromal membrane-associated protein 1	11.682	12.9462	12.6681	12.2164	11.6771	12.3224	12.7425	12.8028	12.2347	11.3592	12.1093	12.5366	12.602	12.0816	12.2807	0.703897	0.273491	1.1343	12.2841	3.51717	-2.18849	0.00355346	0.0168063	0.653101	0.222695	1.08351	12.2841	3.26336	-2.68203	0.00584832	0.0257902	0.139699	-0.290707	0.570105	12.2841	0.698036	-6.66221	0.496911	0.66373	-0.265553	-0.695959	0.164853	12.2841
6392	sp|Q9Y2V2|CHSP1_HUMAN Calcium-regulated heat-stable protein 1 OS=Homo sapiens OX=9606 GN=CARHSP1 PE=1 SV=2;tr|H3BTK3|H3BTK3_HUMAN Calcium-regulated heat-stable protein 1 (Fragment) OS=Homo sapiens OX=9606 GN=CARHSP1 PE=1 SV=1;tr|I3L3X8|I3L3X8_HUMAN Calcium	Q9Y2V2;H3BTK3;I3L3X8;H3BSW7;H3BUY4;H3BPY5;H3BNU9	17.191	Q9Y2V2	CARHSP1	Calcium-regulated heat-stable protein 1	19.2006	20.0657	19.739	19.1404	18.4722	19.0799	19.6908	19.6534	18.9435	18.2359	18.9951	19.6261	19.4184	18.7721	18.894	0.702328	0.356733	1.04792	19.1951	4.37054	-0.546029	0.000682812	0.00593504	0.511728	0.166133	0.857324	19.1951	3.18445	-2.83383	0.00682902	0.0285304	-0.139862	-0.485458	0.205733	19.1951	-0.870352	-6.52489	0.399203	0.582072	-0.557842	-0.903437	-0.212246	19.1951
4236	sp|Q16763|UBE2S_HUMAN Ubiquitin-conjugating enzyme E2 S OS=Homo sapiens OX=9606 GN=UBE2S PE=1 SV=2;tr|K7EPJ1|K7EPJ1_HUMAN Ubiquitin-conjugating enzyme E2 S (Fragment) OS=Homo sapiens OX=9606 GN=UBE2S PE=1 SV=1	Q16763;K7EPJ1	13.367	Q16763	UBE2S	Ubiquitin-conjugating enzyme E2 S	14.9805	16.0038	15.4148	14.7927	15.367	15.097	15.7087	15.4254	14.5124	15.3484	15.0466	15.5176	15.3357	14.6602	14.867	0.701995	0.408772	0.995219	15.2052	5.14871	0.900827	0.000161828	0.00249403	0.350604	0.0573811	0.643828	15.2052	2.57147	-3.98742	0.0225684	0.0654745	-0.386283	-0.679506	-0.0930596	15.2052	-2.83315	-3.57161	0.0135902	0.058025	0.152794	-0.14043	0.446017	15.2052
3063	sp|P20591|MX1_HUMAN Interferon-induced GTP-binding protein Mx1 OS=Homo sapiens OX=9606 GN=MX1 PE=1 SV=4;tr|A0A7P0T9R0|A0A7P0T9R0_HUMAN Interferon-induced GTP-binding protein Mx1 OS=Homo sapiens OX=9606 GN=MX1 PE=4 SV=1;tr|A0A7P0T9I6|A0A7P0T9I6_HUMAN Interf	P20591;A0A7P0T9R0;A0A7P0T9I6;F8W8T1;H9KVC7;A0A7P0Z4E0	121.51	P20591	MX1	Interferon-induced GTP-binding protein Mx1	24.3654	25.1645	25.1117	24.1354	22.0971	24.3275	25.0686	24.9474	23.0879	20.8988	24.4101	24.9746	24.6884	22.6146	21.1657	0.701553	0.00139522	1.40171	23.8038	2.1549	-4.72033	0.0496053	0.101703	0.548167	-0.151991	1.24833	23.8038	1.68376	-5.47516	0.115018	0.21088	-1.08836	-1.78852	-0.388203	23.8038	-3.34303	-2.59526	0.00500111	0.0281495	-2.98048	-3.68063	-2.28032	23.8038
3385	sp|P48507|GSH0_HUMAN Glutamate--cysteine ligase regulatory subunit OS=Homo sapiens OX=9606 GN=GCLM PE=1 SV=1	P48507	11.671	P48507	GCLM	Glutamate--cysteine ligase regulatory subunit	18.0263	18.7755	18.605	18.2627	18.0409	17.8749	18.6374	18.5182	18.3107	18.0072	17.9516	18.5435	18.3802	18.053	18.172	0.701208	0.507895	0.894521	18.2773	7.80098	5.21704	2.20166e-06	0.000216456	0.550161	0.356848	0.743474	18.2773	6.12056	2.59695	2.99852e-05	0.000874581	0.257868	0.0645551	0.451181	18.2773	2.86879	-3.50436	0.0126771	0.0551463	0.122475	-0.0708378	0.315788	18.2773
188	tr|A0A096LNY5|A0A096LNY5_HUMAN Adenylosuccinate lyase OS=Homo sapiens OX=9606 GN=ADSL PE=1 SV=2;tr|A0A1B0GWJ0|A0A1B0GWJ0_HUMAN Adenylosuccinate lyase OS=Homo sapiens OX=9606 GN=ADSL PE=1 SV=1;tr|A0A1B0GTJ7|A0A1B0GTJ7_HUMAN Adenylosuccinate lyase OS=Homo sa	A0A096LNY5;A0A1B0GWJ0;A0A1B0GTJ7;A0A096LNY6;A0A7P0T9A7;A0A7P0Z472;P30566;A0A7P0T8E4;A0A0A6YY92	9.8517	A0A096LNY5	ADSL	Adenylosuccinate lyase	18.2069	19.0494	18.6816	18.176	17.9839	17.9247	18.7478	18.4744	17.9603	17.7033	18.0933	18.5303	18.4104	17.7729	18.2157	0.700894	0.372034	1.02975	18.2621	4.58357	-0.143443	0.00045708	0.00473134	0.447178	0.118317	0.776038	18.2621	2.92436	-3.33008	0.0113726	0.040794	-0.105238	-0.434099	0.223622	18.2621	-0.688216	-6.6692	0.502882	0.668479	-0.107336	-0.436197	0.221524	18.2621
3531	sp|P54577|SYYC_HUMAN Tyrosine--tRNA ligase, cytoplasmic OS=Homo sapiens OX=9606 GN=YARS1 PE=1 SV=4;tr|A0A6Q8PFX2|A0A6Q8PFX2_HUMAN Tyrosine--tRNA ligase OS=Homo sapiens OX=9606 GN=YARS1 PE=1 SV=1	P54577;A0A6Q8PFX2	79.574	P54577	YARS1	Tyrosine--tRNA ligase, cytoplasmic	22.9885	23.7135	23.4903	23.2131	22.6015	22.9469	23.6899	23.5145	23.0767	22.662	23.0341	23.6682	23.3972	23.0358	22.8496	0.700692	0.542103	0.859282	23.1921	9.50201	7.48176	2.22416e-07	5.24408e-05	0.4775	0.318911	0.63609	23.1921	6.47533	3.18353	1.67413e-05	0.000621678	0.118681	-0.0399086	0.277271	23.1921	1.60942	-5.65735	0.130471	0.281457	-0.285471	-0.444061	-0.126882	23.1921
2820	sp|P06733|ENOA_HUMAN Alpha-enolase OS=Homo sapiens OX=9606 GN=ENO1 PE=1 SV=2;tr|A0A2R8Y6G6|A0A2R8Y6G6_HUMAN 2-phospho-D-glycerate hydro-lyase OS=Homo sapiens OX=9606 GN=ENO1 PE=1 SV=1	P06733;A0A2R8Y6G6	99.087	P06733	ENO1	Alpha-enolase	26.6729	27.5083	27.5038	26.9572	26.3539	26.7648	27.353	27.6259	26.8015	26.0395	26.6665	27.3434	27.1971	26.6706	26.5656	0.7002	0.418616	0.981785	26.9349	5.34782	1.25935	0.000113363	0.00194519	0.740862	0.459278	1.02245	26.9349	5.65838	1.80553	6.5772e-05	0.00149028	0.108388	-0.173196	0.389972	26.9349	0.827818	-6.56133	0.422056	0.601873	-0.381739	-0.663324	-0.100155	26.9349
1560	tr|E9PM92|E9PM92_HUMAN Small acidic protein OS=Homo sapiens OX=9606 GN=C11orf58 PE=1 SV=2;sp|O00193|SMAP_HUMAN Small acidic protein OS=Homo sapiens OX=9606 GN=SMAP PE=1 SV=1;tr|E9PRZ9|E9PRZ9_HUMAN Chromosome 11 open reading frame 58 (Fragment) OS=Homo sapi	E9PM92;O00193;E9PRZ9	20.512	E9PM92	C11orf58	Small acidic protein	19.3632	20.3246	19.7307	19.4407	18.9972	19.2677	19.6842	19.8927	18.8614	19.2576	19.5788	20.3013	19.7097	19.1778	19.9356	0.70014	0.219356	1.18092	19.5682	3.13183	-2.93148	0.00757247	0.0272632	0.374481	-0.106302	0.855265	19.5682	1.67511	-5.4879	0.11673	0.213203	-0.243262	-0.724045	0.237522	19.5682	-1.08815	-6.31338	0.29543	0.483845	-0.00642801	-0.487212	0.474356	19.5682
4437	sp|Q5TFE4|NT5D1_HUMAN 5-nucleotidase domain-containing protein 1 OS=Homo sapiens OX=9606 GN=NT5DC1 PE=1 SV=1;tr|Q5QPD0|Q5QPD0_HUMAN 5-nucleotidase domain-containing protein 1 (Fragment) OS=Homo sapiens OX=9606 GN=NT5DC1 PE=1 SV=1	Q5TFE4;Q5QPD0	20.257	Q5TFE4	NT5DC1	5-nucleotidase domain-containing protein 1	19.2914	20.1724	19.9281	19.0938	18.5146	19.2884	20.0166	19.8638	18.9582	17.9346	19.2807	19.7714	19.6875	18.7286	18.834	0.699982	0.317789	1.08218	19.2909	3.93882	-1.373	0.00156202	0.00990672	0.53964	0.157447	0.921834	19.2909	3.03658	-3.11687	0.0091288	0.0350026	-0.359959	-0.742152	0.0222348	19.2909	-2.0255	-5.01317	0.0628929	0.170508	-0.859072	-1.24127	-0.476879	19.2909
510	tr|A0A286YF37|A0A286YF37_HUMAN F-box only protein 2 (Fragment) OS=Homo sapiens OX=9606 GN=FBXO2 PE=1 SV=1;sp|Q9UK22|FBX2_HUMAN F-box only protein 2 OS=Homo sapiens OX=9606 GN=FBXO2 PE=1 SV=2	A0A286YF37;Q9UK22	5.9671	A0A286YF37	FBXO2	F-box only protein 2 (Fragment)	14.998	15.7839	15.9098	15.773	14.2741	15.5225	16.1354	16.0134	15.9677	13.8874	15.1676	15.8673	15.6526	15.2609	13.2336	0.699494	0.189611	1.20938	15.2965	2.95037	-3.27747	0.0108084	0.0342151	0.629244	0.119361	1.13913	15.2965	2.65406	-3.83575	0.0192445	0.0586547	0.437845	-0.0720384	0.947728	15.2965	1.84677	-5.30075	0.08664	0.212787	-1.43099	-1.94087	-0.921107	15.2965
4677	sp|Q7Z4H3|HDDC2_HUMAN 5-deoxynucleotidase HDDC2 OS=Homo sapiens OX=9606 GN=HDDC2 PE=1 SV=1	Q7Z4H3	1.9518	Q7Z4H3	HDDC2	5-deoxynucleotidase HDDC2	14.404	15.4936	15.1205	14.6243	13.8818	14.3919	15.0178	15.1146	14.532	13.7769	14.3755	14.7549	15.0279	14.4249	14.1688	0.698318	0.383944	1.01269	14.6073	4.77716	0.21843	0.000318837	0.00380097	0.697212	0.382839	1.01159	14.6073	4.7696	0.201642	0.000323329	0.0040147	0.136601	-0.177772	0.450975	14.6073	0.934483	-6.46687	0.366343	0.552117	-0.447996	-0.76237	-0.133623	14.6073
3194	sp|P30307|MPIP3_HUMAN M-phase inducer phosphatase 3 OS=Homo sapiens OX=9606 GN=CDC25C PE=1 SV=2	P30307	4.1088	P30307	CDC25C	M-phase inducer phosphatase 3	14.5044	15.3179	15.3449	14.3703	14.4194	14.6229	15.182	15.0903	14.4455	14.1916	14.5755	15.2948	14.9622	14.6183	14.6966	0.697332	0.435892	0.958773	14.7758	5.73627	1.94333	5.74972e-05	0.00135037	0.564864	0.303424	0.826305	14.7758	4.64659	-0.0279864	0.000406314	0.0046362	-0.0895422	-0.350983	0.171898	14.7758	-0.736576	-6.6339	0.473889	0.645041	-0.131702	-0.393143	0.129739	14.7758
315	sp|P43490|NAMPT_HUMAN Nicotinamide phosphoribosyltransferase OS=Homo sapiens OX=9606 GN=NAMPT PE=1 SV=1;tr|A0A0C4DFS8|A0A0C4DFS8_HUMAN Nicotinamide phosphoribosyltransferase OS=Homo sapiens OX=9606 GN=NAMPT PE=1 SV=1;tr|A0A7P0T9I9|A0A7P0T9I9_HUMAN Nicotina	P43490;A0A0C4DFS8;A0A7P0T9I9;A0A7P0T8L3;A0A7P0T973;A0A7P0TAS5;A0A7P0T931;A0A7P0T8D2;A0A7P0T895;A0A7P0T862;A0A7P0TBB7;A0A7P0T941;A0A7P0TA73;A0A7P0Z466;B7Z8W6	13.869	P43490	NAMPT	Nicotinamide phosphoribosyltransferase	19.7888	20.5843	20.2368	19.4901	18.9319	19.5439	20.347	20.0615	19.19	18.6669	19.7216	20.2137	19.9231	19.0343	19.2522	0.696941	0.367524	1.02636	19.6657	4.55002	-0.20656	0.000486742	0.00484914	0.389061	0.0596441	0.718478	19.6657	2.54001	-4.04479	0.0239754	0.0683309	-0.446622	-0.776039	-0.117205	19.6657	-2.91579	-3.41539	0.0115648	0.0514851	-0.734414	-1.06383	-0.404997	19.6657
2761	tr|Q5T9B7|Q5T9B7_HUMAN Adenylate kinase isoenzyme 1 OS=Homo sapiens OX=9606 GN=AK1 PE=1 SV=1;sp|P00568|KAD1_HUMAN Adenylate kinase isoenzyme 1 OS=Homo sapiens OX=9606 GN=AK1 PE=1 SV=3	Q5T9B7;P00568	24.411	Q5T9B7	AK1	Adenylate kinase isoenzyme 1	20.0369	21.0147	20.8539	20.2631	19.439	19.8731	20.5606	20.7418	20.117	19.3263	19.9783	20.3961	20.5661	20.1232	20.0369	0.694374	0.321271	1.06748	20.2218	4.00247	-1.25035	0.00138117	0.00915886	0.757858	0.384756	1.13096	20.2218	4.36841	-0.552965	0.000685577	0.00640979	0.205013	-0.168089	0.578116	20.2218	1.18173	-6.21033	0.257556	0.443255	-0.362001	-0.735104	0.0111009	20.2218
3712	sp|P68371|TBB4B_HUMAN Tubulin beta-4B chain OS=Homo sapiens OX=9606 GN=TUBB4B PE=1 SV=1;sp|P04350|TBB4A_HUMAN Tubulin beta-4A chain OS=Homo sapiens OX=9606 GN=TUBB4A PE=1 SV=2	P68371;P04350	145.55	P68371	TUBB4B	Tubulin beta-4B chain	25.0182	25.8869	25.8007	25.1115	24.6695	24.9559	25.6197	25.772	24.8383	24.457	25.0672	25.6112	25.5376	24.8378	25.0242	0.692164	0.406969	0.977359	25.2138	5.21952	1.02891	0.000142502	0.00228835	0.689687	0.404492	0.974881	25.2138	5.20084	0.992639	0.000147355	0.00250432	-0.084569	-0.369764	0.200626	25.2138	-0.637723	-6.70366	0.534239	0.695778	-0.296823	-0.582017	-0.0116277	25.2138
3512	sp|P53384|NUBP1_HUMAN Cytosolic Fe-S cluster assembly factor NUBP1 OS=Homo sapiens OX=9606 GN=NUBP1 PE=1 SV=2;tr|I3L531|I3L531_HUMAN Cytosolic Fe-S cluster assembly factor NUBP1 (Fragment) OS=Homo sapiens OX=9606 GN=NUBP1 PE=1 SV=1	P53384;I3L531	26.203	P53384	NUBP1	Cytosolic Fe-S cluster assembly factor NUBP1	16.0881	17.0178	16.7609	16.384	15.6418	16.1572	16.7271	16.8017	16.1632	15.4702	16.0586	16.6282	16.4761	16.0874	16.1085	0.689738	0.365618	1.01386	16.3047	4.57659	-0.15657	0.000463096	0.00477774	0.578291	0.254171	0.902411	16.3047	3.83711	-1.57245	0.00190269	0.0122864	0.110248	-0.213872	0.434368	16.3047	0.731525	-6.63769	0.476869	0.647419	-0.361143	-0.685263	-0.0370236	16.3047
3300	sp|P40306|PSB10_HUMAN Proteasome subunit beta type-10 OS=Homo sapiens OX=9606 GN=PSMB10 PE=1 SV=1	P40306	13.773	P40306	PSMB10	Proteasome subunit beta type-10	19.8827	20.7271	20.2765	19.3276	18.2953	19.8387	20.3513	20.0362	18.5983	17.628	19.8591	20.5679	19.7826	18.3303	18.3929	0.688586	0.184486	1.19269	19.4596	2.93768	-3.30151	0.0110802	0.0347641	0.171615	-0.332486	0.675715	19.4596	0.732151	-6.56138	0.476499	0.595227	-1.10812	-1.61222	-0.604017	19.4596	-4.7275	0.065669	0.000349549	0.00426289	-1.75477	-2.25887	-1.25067	19.4596
529	tr|A0A2R8Y544|A0A2R8Y544_HUMAN Acyl-CoA-binding domain-containing protein 6 OS=Homo sapiens OX=9606 GN=ACBD6 PE=1 SV=1;sp|Q9BR61|ACBD6_HUMAN Acyl-CoA-binding domain-containing protein 6 OS=Homo sapiens OX=9606 GN=ACBD6 PE=1 SV=1	A0A2R8Y544;Q9BR61	3.5204	A0A2R8Y544	ACBD6	Acyl-CoA-binding domain-containing protein 6	16.1633	17.0009	16.7963	16.159	15.7089	16.0586	16.7107	16.848	16.0696	15.5522	16.1833	16.7485	16.6175	15.8637	15.941	0.684931	0.443044	0.926818	16.2948	6.08972	2.54719	3.157e-05	0.00098243	0.618845	0.376958	0.860732	16.2948	5.50214	1.53117	8.63505e-05	0.00178504	-0.104327	-0.346214	0.13756	16.2948	-0.927571	-6.4733	0.369792	0.555572	-0.401024	-0.642911	-0.159137	16.2948
865	sp|Q9Y5P6|GMPPB_HUMAN Mannose-1-phosphate guanyltransferase beta OS=Homo sapiens OX=9606 GN=GMPPB PE=1 SV=2;tr|A0A7I2YQI5|A0A7I2YQI5_HUMAN Mannose-1-phosphate guanyltransferase beta OS=Homo sapiens OX=9606 GN=GMPPB PE=1 SV=1;tr|A0A7I2V4B5|A0A7I2V4B5_HUMAN	Q9Y5P6;A0A7I2YQI5;A0A7I2V4B5	12.565	Q9Y5P6	GMPPB	Mannose-1-phosphate guanyltransferase beta	16.1646	16.9402	16.9107	16.4285	15.7609	16.4079	16.8835	16.7429	16.2198	15.5154	15.9721	16.7647	16.6056	15.745	16.117	0.681236	0.302117	1.06035	16.3453	3.86443	-1.51658	0.00180434	0.0108773	0.571514	0.192396	0.950633	16.3453	3.24202	-2.72313	0.00609878	0.0264156	-0.0504434	-0.429562	0.328675	16.3453	-0.286149	-6.87326	0.779074	0.870103	-0.38377	-0.762888	-0.00465145	16.3453
104	tr|A0A087WXK8|A0A087WXK8_HUMAN Chromosome 20 open reading frame 129 OS=Homo sapiens OX=9606 GN=FAM83D PE=1 SV=1;sp|Q9H4H8|FA83D_HUMAN Protein FAM83D OS=Homo sapiens OX=9606 GN=FAM83D PE=1 SV=3	A0A087WXK8;Q9H4H8	4.3822	A0A087WXK8	FAM83D	Chromosome 20 open reading frame 129	16.4645	16.8548	16.7982	16.251	16.7089	16.3063	17.1013	16.6432	16.1435	16.6134	16.347	17.2048	16.5791	16.1604	16.5266	0.681038	0.4821	0.879976	16.5802	7.36235	4.5722	4.20048e-06	0.00029735	0.300903	0.101965	0.499841	16.5802	3.25291	-2.70217	0.00596971	0.0261591	-0.187595	-0.386533	0.0113426	16.5802	-2.028	-5.00905	0.0626081	0.170108	0.243696	0.0447584	0.442634	16.5802
3710	sp|P68363|TBA1B_HUMAN Tubulin alpha-1B chain OS=Homo sapiens OX=9606 GN=TUBA1B PE=1 SV=1	P68363	24.068	P68363	TUBA1B	Tubulin alpha-1B chain	20.942	21.7328	21.8946	21.0296	20.5741	21.1875	21.8304	21.7182	20.916	20.2312	20.9774	21.579	21.4752	20.7179	20.8561	0.678462	0.35933	0.997595	21.1775	4.57212	-0.164965	0.000466985	0.00477946	0.660335	0.341202	0.979467	21.1775	4.44996	-0.398292	0.000587569	0.00587292	-0.147813	-0.466946	0.171319	21.1775	-0.996107	-6.40773	0.336583	0.524537	-0.481805	-0.800937	-0.162672	21.1775
5061	sp|Q8WUH6|TM263_HUMAN Transmembrane protein 263 OS=Homo sapiens OX=9606 GN=TMEM263 PE=1 SV=1	Q8WUH6	5.7317	Q8WUH6	TMEM263	Transmembrane protein 263	16.829	17.5672	17.2427	17.1166	15.9571	16.7911	17.5701	17.1104	16.4007	15.7203	16.8906	17.4064	17.1371	16.3998	16.7944	0.677641	0.18771	1.16757	16.8622	2.9746	-3.23149	0.0103077	0.0333599	0.326488	-0.163442	0.816419	16.8622	1.43316	-5.82594	0.174387	0.285797	-0.19788	-0.687811	0.292051	16.8622	-0.868621	-6.5264	0.400116	0.582972	-0.679623	-1.16955	-0.189692	16.8622
1682	tr|F6WQW2|F6WQW2_HUMAN Ran-specific GTPase-activating protein OS=Homo sapiens OX=9606 GN=RANBP1 PE=1 SV=1;sp|P43487|RANG_HUMAN Ran-specific GTPase-activating protein OS=Homo sapiens OX=9606 GN=RANBP1 PE=1 SV=1;tr|C9JXG8|C9JXG8_HUMAN Ran-specific GTPase-act	F6WQW2;P43487;C9JXG8;C9JJ34;C9JGV6	18.36	F6WQW2	RANBP1	Ran-specific GTPase-activating protein	22.0095	22.8537	22.5988	22.139	21.7728	22.0031	22.6166	22.6413	21.9506	21.6321	22.0011	22.5553	22.4103	21.8304	22.215	0.670641	0.384552	0.95673	22.2153	5.04141	0.705484	0.000196479	0.00282077	0.54556	0.259471	0.831649	22.2153	4.10114	-1.06363	0.00114207	0.00882474	-0.0312388	-0.317328	0.25485	22.2153	-0.234831	-6.8874	0.817837	0.894003	-0.131261	-0.41735	0.154828	22.2153
5833	sp|Q9HAV4|XPO5_HUMAN Exportin-5 OS=Homo sapiens OX=9606 GN=XPO5 PE=1 SV=1	Q9HAV4	47.63	Q9HAV4	XPO5	Exportin-5	20.1887	20.9983	20.7213	20.2198	19.9621	20.1714	20.8018	20.5998	20.277	19.8244	20.2574	20.8209	20.6871	20.3344	20.4805	0.667865	0.394723	0.941008	20.423	5.25852	1.09918	0.000132899	0.00218154	0.463577	0.190435	0.736719	20.423	3.65003	-1.93443	0.00273981	0.0155615	0.0712353	-0.201907	0.344377	20.423	0.56088	-6.75135	0.583998	0.732776	-0.116859	-0.390001	0.156283	20.423
616	tr|A0A3B3ISC0|A0A3B3ISC0_HUMAN Interferon regulatory factor 7 (Fragment) OS=Homo sapiens OX=9606 GN=IRF7 PE=1 SV=1;tr|A0A3B3ISS4|A0A3B3ISS4_HUMAN Interferon regulatory factor 7 (Fragment) OS=Homo sapiens OX=9606 GN=IRF7 PE=1 SV=1;tr|E9PR03|E9PR03_HUMAN Int	A0A3B3ISC0;A0A3B3ISS4;E9PR03;E9PIA7;M9RSF4;Q92985	2.8977	A0A3B3ISC0	IRF7	Interferon regulatory factor 7 (Fragment)	11.5768	12.306	10.7634	10.4678	NA	11.0251	11.7648	10.7071	10.8373	9.95492	11.3563	11.8881	10.4324	10.3866	9.59101	0.666924	0.278547	1.0553	10.9327	3.7216	-1.87728	0.00269257	0.0140961	-0.685064	-1.07344	-0.296687	10.9327	-3.82283	-1.69136	0.00222807	0.0135008	-0.755503	-1.14388	-0.367126	10.9327	-4.21589	-1.02434	0.00107741	0.0093699	-1.54642	-1.98064	-1.1122	10.9327
885	tr|A0A7P0T8B3|A0A7P0T8B3_HUMAN Interferon-induced protein with tetratricopeptide repeats 2 (Fragment) OS=Homo sapiens OX=9606 GN=IFIT2 PE=4 SV=1;sp|P09913|IFIT2_HUMAN Interferon-induced protein with tetratricopeptide repeats 2 OS=Homo sapiens OX=9606 GN=IF	A0A7P0T8B3;P09913;A0A7P0TAT2;A0A087X279	71.943	A0A7P0T8B3	IFIT2	Interferon-induced protein with tetratricopeptide repeats 2 (Fragment)	22.4587	23.0724	22.2675	21.5755	19.6194	22.3035	22.9956	22.1445	20.6699	19.1523	22.4492	23.1407	22.0488	20.2371	18.8018	0.665757	0.109217	1.2223	21.5291	2.57266	-3.98182	0.0225168	0.0578524	-0.250202	-0.806742	0.306337	21.5291	-0.966847	-6.36072	0.350492	0.474502	-1.57632	-2.13286	-1.01978	21.5291	-6.0913	2.50219	3.14863e-05	0.000856588	-3.21268	-3.76922	-2.65614	21.5291
2633	sp|O94829|IPO13_HUMAN Importin-13 OS=Homo sapiens OX=9606 GN=IPO13 PE=1 SV=3	O94829	8.7404	O94829	IPO13	Importin-13	15.5107	16.1622	16.2026	15.7817	15.2415	15.2876	16.0783	16.1635	15.6915	15.1454	15.3966	15.9509	15.9836	15.4428	15.6916	0.66553	0.382192	0.948868	15.7154	5.05157	0.724042	0.00019289	0.00279076	0.718309	0.434971	1.00165	15.7154	5.45217	1.4427	9.42731e-05	0.00186963	0.240397	-0.0429403	0.523735	15.7154	1.82469	-5.33521	0.090077	0.219285	-0.0387508	-0.322089	0.244587	15.7154
1552	tr|E9PPJ5|E9PPJ5_HUMAN Midkine (Fragment) OS=Homo sapiens OX=9606 GN=MDK PE=1 SV=1;tr|E9PLM6|E9PLM6_HUMAN Midkine OS=Homo sapiens OX=9606 GN=MDK PE=1 SV=1;sp|P21741|MK_HUMAN Midkine OS=Homo sapiens OX=9606 GN=MDK PE=1 SV=1	E9PPJ5;E9PLM6;P21741	4.692	E9PPJ5	MDK	Midkine (Fragment)	15.6389	16.3526	16.1396	16.226	15.5574	15.9377	16.4331	16.4264	15.9252	15.3779	15.6885	16.4676	15.8349	15.9788	15.3266	0.662745	0.376393	0.949097	15.9541	4.97748	0.588421	0.000220712	0.00304124	0.378577	0.0922251	0.664929	15.9541	2.84326	-3.4831	0.0133248	0.045637	0.288313	0.00196154	0.574665	15.9541	2.16535	-4.7784	0.0486553	0.142737	-0.334389	-0.620741	-0.0480369	15.9541
772	sp|P49588|SYAC_HUMAN Alanine--tRNA ligase, cytoplasmic OS=Homo sapiens OX=9606 GN=AARS1 PE=1 SV=2;tr|H3BPK7|H3BPK7_HUMAN Alanine--tRNA ligase OS=Homo sapiens OX=9606 GN=AARS1 PE=1 SV=4;tr|A0A6Q8PF33|A0A6Q8PF33_HUMAN Alanine--tRNA ligase OS=Homo sapiens OX=	P49588;H3BPK7;A0A6Q8PF33;A0A6Q8PGE8;A0A6Q8PGN5;A0A6Q8PFY2;A0A6Q8PGR9;A0A6Q8PGB5;A0A6Q8PFK3;A0A6Q8PHJ2;A0A6Q8PH44	101.2	P49588	AARS1	Alanine--tRNA ligase, cytoplasmic	23.0906	23.9855	23.8683	23.5081	21.9779	23.0302	23.6519	23.7871	23.1841	21.9687	23.123	23.5942	23.5305	23.0787	22.5493	0.662589	0.317663	1.00752	23.1952	4.13125	-1.00287	0.0010779	0.00787817	0.647333	0.302406	0.992259	23.1952	4.03612	-1.1886	0.00129435	0.00958271	0.175683	-0.169243	0.520609	23.1952	1.09538	-6.30566	0.292359	0.481168	-0.915995	-1.26092	-0.571069	23.1952
2490	sp|O60547|GMDS_HUMAN GDP-mannose 4,6 dehydratase OS=Homo sapiens OX=9606 GN=GMDS PE=1 SV=1	O60547	12.253	O60547	GMDS	GDP-mannose 4,6 dehydratase	19.3037	20.0614	19.8875	19.3156	18.7576	19.1177	19.879	19.7588	19.407	18.3188	19.2948	19.762	19.6853	19.0604	19.2345	0.66203	0.287091	1.03697	19.3896	3.79734	-1.64624	0.00205566	0.0118001	0.538464	0.163524	0.913404	19.3896	3.08858	-3.01758	0.00824349	0.0325175	0.0222641	-0.352676	0.397204	19.3896	0.127704	-6.90799	0.900251	0.947116	-0.46841	-0.84335	-0.0934708	19.3896
2099	sp|Q9UK76|JUPI1_HUMAN Jupiter microtubule associated homolog 1 OS=Homo sapiens OX=9606 GN=JPT1 PE=1 SV=3;tr|J3KT51|J3KT51_HUMAN Jupiter microtubule-associated homolog 1 OS=Homo sapiens OX=9606 GN=JPT1 PE=1 SV=1;tr|J3KSH8|J3KSH8_HUMAN Jupiter microtubule-as	Q9UK76;J3KT51;J3KSH8	4.909	Q9UK76	JPT1	Jupiter microtubule associated homolog 1	16.6012	17.3094	17.2681	16.474	16.0502	16.5306	16.9795	17.0199	16.5218	16.273	16.6026	17.4283	16.8442	16.2499	16.434	0.660948	0.372757	0.94914	16.7058	4.9323	0.505392	0.000239696	0.00316148	0.465976	0.177785	0.754167	16.7058	3.47733	-2.2688	0.0038422	0.0193625	-0.162887	-0.451078	0.125304	16.7058	-1.21554	-6.1714	0.24483	0.428184	-0.325707	-0.613898	-0.0375155	16.7058
4691	sp|Q7Z7A1|CNTRL_HUMAN Centriolin OS=Homo sapiens OX=9606 GN=CNTRL PE=1 SV=2;tr|Q5JVD6|Q5JVD6_HUMAN Centriolin (Fragment) OS=Homo sapiens OX=9606 GN=CNTRL PE=1 SV=1;tr|Q5JVD1|Q5JVD1_HUMAN Centriolin OS=Homo sapiens OX=9606 GN=CNTRL PE=1 SV=1	Q7Z7A1;Q5JVD6;Q5JVD1	3.0175	Q7Z7A1	CNTRL	Centriolin	18.4944	19.1796	18.9843	18.0271	16.1235	18.2341	18.9654	18.9593	16.9928	15.5978	18.2391	18.7976	18.6051	16.5459	14.7898	0.658345	-0.0655336	1.38222	17.7691	1.95592	-5.05028	0.0713248	0.132454	0.527041	-0.196838	1.25092	17.7691	1.56582	-5.64512	0.140345	0.243084	-1.13395	-1.85783	-0.410074	17.7691	-3.36893	-2.54509	0.00475305	0.0271859	-2.81882	-3.5427	-2.09495	17.7691
699	tr|A0A590UJJ4|A0A590UJJ4_HUMAN K(+) channel subunit beta-2 OS=Homo sapiens OX=9606 GN=KCNAB2 PE=1 SV=1;tr|A0A590UJB6|A0A590UJB6_HUMAN K(+) channel subunit beta-2 OS=Homo sapiens OX=9606 GN=KCNAB2 PE=1 SV=1;sp|Q13303|KCAB2_HUMAN Voltage-gated potassium chan	A0A590UJJ4;A0A590UJB6;Q13303;A0A5F9UN28	13.355	A0A590UJJ4	KCNAB2	K(+) channel subunit beta-2	15.8427	16.692	16.3614	16.2306	15.792	15.9172	16.3808	16.406	15.9925	15.8859	15.9537	16.611	16.2955	15.8447	16.1192	0.656717	0.421048	0.892386	16.155	5.99292	2.38359	3.71392e-05	0.00108797	0.449744	0.214075	0.685414	16.155	4.10417	-1.0578	0.00113543	0.00879475	0.118036	-0.117633	0.353706	16.155	1.07715	-6.32502	0.300141	0.487703	0.0278172	-0.207852	0.263486	16.155
611	tr|C9JIR6|C9JIR6_HUMAN Protein-serine/threonine phosphatase (Fragment) OS=Homo sapiens OX=9606 GN=PPM1B PE=1 SV=1;tr|A0A3B3IS24|A0A3B3IS24_HUMAN Protein-serine/threonine phosphatase OS=Homo sapiens OX=9606 PE=3 SV=1;sp|O75688|PPM1B_HUMAN Protein phosphatas	C9JIR6;A0A3B3IS24;O75688	5.1613	C9JIR6	PPM1B	Protein-serine/threonine phosphatase (Fragment)	14.0597	14.9674	14.5741	14.1569	13.4005	13.896	14.7742	14.6515	13.843	13.1935	14.1412	14.323	14.3536	13.8078	13.8424	0.655914	0.275368	1.03646	14.1323	3.70683	-1.82133	0.00245213	0.0132403	0.494087	0.113542	0.874633	14.1323	2.79229	-3.57876	0.0147166	0.0488024	-0.0964254	-0.476971	0.28412	14.1323	-0.544939	-6.76051	0.594615	0.741638	-0.553535	-0.93408	-0.172989	14.1323
3570	sp|P55957|BID_HUMAN BH3-interacting domain death agonist OS=Homo sapiens OX=9606 GN=BID PE=1 SV=1	P55957	5.0668	P55957	BID	BH3-interacting domain death agonist	17.5111	18.4395	17.8731	17.7504	17.0421	17.5144	18.0095	17.9027	17.3302	17.0755	17.4434	17.9778	17.499	17.1765	17.4894	0.652652	0.288257	1.01705	17.6023	3.85187	-1.54084	0.00184889	0.0110206	0.268637	-0.0957587	0.633032	17.6023	1.58546	-5.61739	0.13582	0.237509	-0.0706251	-0.43502	0.29377	17.6023	-0.416821	-6.82489	0.683311	0.805398	-0.287275	-0.651671	0.0771201	17.6023
1121	tr|B5MDQ0|B5MDQ0_HUMAN DNA excision repair protein ERCC-6-like OS=Homo sapiens OX=9606 GN=ERCC6L PE=1 SV=1;sp|Q2NKX8|ERC6L_HUMAN DNA excision repair protein ERCC-6-like OS=Homo sapiens OX=9606 GN=ERCC6L PE=1 SV=1	B5MDQ0;Q2NKX8	3.4088	B5MDQ0	ERCC6L	DNA excision repair protein ERCC-6-like	15.7851	16.7169	16.4201	15.966	15.4227	15.8786	16.3843	16.0889	15.6959	15.2275	15.9413	16.4587	15.9274	15.5056	16.0731	0.651611	0.240373	1.06285	15.9661	3.40768	-2.4003	0.00440489	0.0190629	0.277138	-0.1341	0.688376	15.9661	1.44933	-5.80452	0.169901	0.280103	-0.145853	-0.55709	0.265385	15.9661	-0.762755	-6.61387	0.45863	0.631966	-0.293894	-0.705132	0.117344	15.9661
383	tr|A0A0G2JIW1|A0A0G2JIW1_HUMAN Heat shock 70 kDa protein 1B OS=Homo sapiens OX=9606 GN=HSPA1B PE=1 SV=1;sp|P0DMV9|HS71B_HUMAN Heat shock 70 kDa protein 1B OS=Homo sapiens OX=9606 GN=HSPA1B PE=1 SV=1;sp|P0DMV8|HS71A_HUMAN Heat shock 70 kDa protein 1A OS=Hom	A0A0G2JIW1;P0DMV9;P0DMV8;V9GZ37	166.01	A0A0G2JIW1	HSPA1B	Heat shock 70 kDa protein 1B	25.5916	26.3191	25.929	25.4894	24.3868	25.3887	26.1056	25.8451	25.3647	24.2277	25.5872	26.097	25.7963	25.3491	24.8838	0.651417	0.365242	0.937593	25.4907	4.89542	0.437427	0.000256447	0.00329851	0.334306	0.048131	0.620482	25.4907	2.51232	-4.09506	0.0252828	0.0709456	-0.12143	-0.407606	0.164745	25.4907	-0.912553	-6.48712	0.377363	0.562901	-1.02305	-1.30922	-0.736871	25.4907
2981	sp|P15121|ALDR_HUMAN Aldo-keto reductase family 1 member B1 OS=Homo sapiens OX=9606 GN=AKR1B1 PE=1 SV=3;tr|E9PCX2|E9PCX2_HUMAN Aldo-keto reductase family 1 member B1 OS=Homo sapiens OX=9606 GN=AKR1B1 PE=1 SV=1	P15121;E9PCX2	11.997	P15121	AKR1B1	Aldo-keto reductase family 1 member B1	19.4525	20.292	20.502	20.2928	19.5702	19.5267	20.077	20.425	20.0697	19.454	19.6109	20.1754	20.3479	20.1947	19.8969	0.651404	0.425189	0.87762	19.9925	6.19286	2.72003	2.65894e-05	0.000902996	0.894942	0.668727	1.12116	19.9925	8.50817	6.20185	8.16158e-07	8.11949e-05	0.655697	0.429482	0.881913	19.9925	6.23368	2.74181	2.48532e-05	0.000729102	0.110319	-0.115896	0.336534	19.9925
1572	tr|E9PN48|E9PN48_HUMAN ADP-ribosylation factor GTPase-activating protein 2 (Fragment) OS=Homo sapiens OX=9606 GN=ARFGAP2 PE=1 SV=1	E9PN48	3.4413	E9PN48	ARFGAP2	ADP-ribosylation factor GTPase-activating protein 2 (Fragment)	17.197	18.0172	17.6902	17.258	16.9384	17.1773	17.7587	17.6859	17.0658	16.8857	17.1279	17.68	17.5298	17.1093	17.3013	0.651271	0.41231	0.890231	17.3615	5.86136	2.15909	4.64125e-05	0.00120106	0.467947	0.228986	0.706907	17.3615	4.21147	-0.852188	0.000924346	0.00776427	-0.0229785	-0.261939	0.215982	17.3615	-0.206803	-6.89395	0.839226	0.908282	-0.125542	-0.364502	0.113419	17.3615
4326	sp|Q5EBM0|CMPK2_HUMAN UMP-CMP kinase 2, mitochondrial OS=Homo sapiens OX=9606 GN=CMPK2 PE=1 SV=3	Q5EBM0	16.765	Q5EBM0	CMPK2	UMP-CMP kinase 2, mitochondrial	17.2178	18.0083	17.8513	16.8729	14.8655	17.2366	17.8318	17.6977	15.7369	13.9544	17.161	17.7291	17.5229	15.3244	13.6649	0.651235	-0.0574265	1.3599	16.5784	1.97634	-5.0172	0.0687487	0.129175	0.48547	-0.223191	1.19413	16.5784	1.47328	-5.77246	0.163429	0.273182	-1.22707	-1.93573	-0.518407	16.5784	-3.72386	-1.85611	0.00237203	0.0166121	-3.04356	-3.75222	-2.3349	16.5784
4503	sp|Q6DHV7|ADAL_HUMAN Adenosine deaminase-like protein OS=Homo sapiens OX=9606 GN=ADAL PE=1 SV=2	Q6DHV7	2.4447	Q6DHV7	ADAL	Adenosine deaminase-like protein	13.8916	14.7386	14.7428	14.4329	13.7022	14.0622	14.4102	14.6676	14.0835	13.475	13.7575	14.5162	14.4179	13.8469	13.735	0.651224	0.341845	0.960602	14.1653	4.52692	-0.250074	0.00050831	0.00493277	0.705675	0.396297	1.01505	14.1653	4.90544	0.453232	0.000251781	0.00338851	0.217357	-0.0920218	0.526735	14.1653	1.51094	-5.79566	0.153676	0.312257	-0.266374	-0.575752	0.0430049	14.1653
826	tr|A0A7I2V3A9|A0A7I2V3A9_HUMAN Kinesin-like protein OS=Homo sapiens OX=9606 GN=KIF11 PE=1 SV=1;sp|P52732|KIF11_HUMAN Kinesin-like protein KIF11 OS=Homo sapiens OX=9606 GN=KIF11 PE=1 SV=2;tr|A0A7I2YQY4|A0A7I2YQY4_HUMAN Kinesin-like protein OS=Homo sapiens O	A0A7I2V3A9;P52732;A0A7I2YQY4	44.432	A0A7I2V3A9	KIF11	Kinesin-like protein	19.2999	20.0372	19.713	19.1728	19.1705	19.3288	19.9301	19.6988	19.0439	19.0378	19.4009	20.0151	19.5833	18.9307	19.2797	0.650938	0.480358	0.821518	19.4428	8.20683	5.79057	1.23677e-06	0.000145801	0.321821	0.151242	0.492401	19.4428	4.05743	-1.14762	0.00124228	0.00932737	-0.294078	-0.464657	-0.123498	19.4428	-3.70764	-1.88759	0.00244826	0.0169593	-0.180489	-0.351068	-0.00990925	19.4428
2617	sp|O76003|GLRX3_HUMAN Glutaredoxin-3 OS=Homo sapiens OX=9606 GN=GLRX3 PE=1 SV=2	O76003	27.145	O76003	GLRX3	Glutaredoxin-3	21.9096	22.7462	22.4199	21.9272	21.0941	21.7978	22.4389	22.3264	21.5954	20.7524	21.9021	22.3753	22.1963	21.6089	21.6012	0.65032	0.283195	1.01744	21.9128	3.80958	-1.62258	0.00200729	0.0116379	0.444376	0.0772517	0.8115	21.9128	2.60316	-3.92942	0.0212323	0.0627026	-0.159334	-0.526459	0.20779	21.9128	-0.933381	-6.4679	0.366891	0.552216	-0.720604	-1.08773	-0.353479	21.9128
3687	sp|P62942|FKB1A_HUMAN Peptidyl-prolyl cis-trans isomerase FKBP1A OS=Homo sapiens OX=9606 GN=FKBP1A PE=1 SV=2;tr|Q1JUQ3|Q1JUQ3_HUMAN FK506 binding protein12 OS=Homo sapiens OX=9606 GN=FKBP1A PE=2 SV=1;tr|Q5W0X3|Q5W0X3_HUMAN FK506 binding protein12 OS=Homo s	P62942;Q1JUQ3;Q5W0X3;Q1JUQ5;A0A087WZM5;A0A087WTS4;F6T7Q3;A0A087WV48;A0A7I2V3S6	18.73	P62942	FKBP1A	Peptidyl-prolyl cis-trans isomerase FKBP1A	19.8597	20.7255	20.2982	19.6634	19.4011	19.6485	20.2387	20.3672	19.4786	18.9419	19.8334	20.3279	20.0871	19.5789	19.8968	0.650186	0.244982	1.05539	19.8898	3.45085	-2.31681	0.004047	0.0181303	0.470291	0.0650872	0.875495	19.8898	2.49607	-4.12448	0.0260822	0.0721052	-0.206891	-0.612095	0.198313	19.8898	-1.09807	-6.30278	0.291224	0.479877	-0.367257	-0.772461	0.0379472	19.8898
6029	sp|Q9NWY4|HPF1_HUMAN Histone PARylation factor 1 OS=Homo sapiens OX=9606 GN=HPF1 PE=1 SV=2	Q9NWY4	7.8383	Q9NWY4	HPF1	Histone PARylation factor 1	14.7905	15.3821	14.9545	14.3207	14.0162	14.3263	15.1779	15.0093	14.2617	13.9306	14.4457	14.9494	15.0494	14.0412	14.5025	0.648954	0.313716	0.984192	14.6105	4.16317	-0.941689	0.00101388	0.00752838	0.483543	0.148305	0.818781	14.6105	3.10202	-2.99186	0.00802885	0.0319898	-0.312958	-0.648196	0.0222798	14.6105	-2.00769	-5.04249	0.0649598	0.175078	-0.371107	-0.706345	-0.0358689	14.6105
397	tr|B7Z683|B7Z683_HUMAN Active breakpoint cluster region-related protein OS=Homo sapiens OX=9606 GN=ABR PE=1 SV=1;tr|A0A0G2JQ41|A0A0G2JQ41_HUMAN Active breakpoint cluster region-related protein (Fragment) OS=Homo sapiens OX=9606 GN=ABR PE=1 SV=1;tr|A0A1C7CY	B7Z683;A0A0G2JQ41;A0A1C7CYZ0;Q12979;I3L1U8	8.512	B7Z683	ABR	Active breakpoint cluster region-related protein	15.4263	16.2158	15.9862	15.7179	15.2094	15.3055	15.926	16.0297	15.8038	14.948	15.3832	15.9143	15.8051	15.5271	15.1026	0.647012	0.425424	0.8686	15.6201	6.27955	2.86409	2.3043e-05	0.000824111	0.568624	0.347036	0.790212	15.6201	5.51876	1.56051	8.38728e-05	0.00174888	0.31126	0.0896716	0.532848	15.6201	3.02092	-3.21528	0.00941332	0.0445209	-0.284997	-0.506585	-0.0634091	15.6201
2174	tr|K7EQL6|K7EQL6_HUMAN Ubiquitinyl hydrolase 1 OS=Homo sapiens OX=9606 GN=USP32 PE=1 SV=1;sp|Q8NFA0|UBP32_HUMAN Ubiquitin carboxyl-terminal hydrolase 32 OS=Homo sapiens OX=9606 GN=USP32 PE=1 SV=1	K7EQL6;Q8NFA0	3.2491	K7EQL6	USP32	Ubiquitinyl hydrolase 1	13.5943	13.8729	13.6551	13.6945	13.6705	13.5792	14.9168	13.8392	13.8228	13.2378	13.597	13.9214	13.811	13.3294	13.5434	0.646851	0.172727	1.12097	13.739	2.9341	-3.30829	0.011158	0.034905	0.178236	-0.295888	0.65236	13.739	0.808476	-6.50162	0.432725	0.554582	0.0253921	-0.448732	0.499516	13.739	0.115178	-6.9096	0.909986	0.953576	-0.106271	-0.580395	0.367852	13.739
2984	sp|P15374|UCHL3_HUMAN Ubiquitin carboxyl-terminal hydrolase isozyme L3 OS=Homo sapiens OX=9606 GN=UCHL3 PE=1 SV=1;tr|A0A087WTB8|A0A087WTB8_HUMAN Ubiquitin carboxyl-terminal hydrolase OS=Homo sapiens OX=9606 GN=UCHL3 PE=1 SV=1;tr|Q5TBK7|Q5TBK7_HUMAN Ubiquit	P15374;A0A087WTB8;Q5TBK7	13.999	P15374	UCHL3	Ubiquitin carboxyl-terminal hydrolase isozyme L3	19.5597	20.4638	20.1576	19.6963	18.9133	19.5229	20.0857	20.1117	19.455	18.8514	19.5923	20.0582	19.876	19.3326	19.764	0.64427	0.221899	1.06664	19.696	3.28048	-2.6458	0.00565494	0.0224435	0.490122	0.0677508	0.912493	19.696	2.49559	-4.12535	0.0261061	0.0721118	-0.0636686	-0.48604	0.358702	19.696	-0.324186	-6.861	0.750727	0.850227	-0.382088	-0.804459	0.0402828	19.696
1431	tr|E7EQR4|E7EQR4_HUMAN Ezrin OS=Homo sapiens OX=9606 GN=EZR PE=1 SV=3;sp|P15311|EZRI_HUMAN Ezrin OS=Homo sapiens OX=9606 GN=EZR PE=1 SV=4	E7EQR4;P15311	124.73	E7EQR4	EZR	Ezrin	23.7113	24.5882	24.0264	23.6009	23.1004	23.7713	24.2652	24.1375	23.3864	22.7488	23.7817	24.3431	23.8013	23.2662	23.65	0.644061	0.26436	1.02376	23.7452	3.64794	-1.93533	0.002751	0.0142846	0.233612	-0.146089	0.613313	23.7452	1.32317	-5.96688	0.207583	0.323228	-0.336975	-0.716676	0.042726	23.7452	-1.90862	-5.20294	0.0776321	0.198079	-0.588378	-0.968079	-0.208677	23.7452
1847	tr|H0Y987|H0Y987_HUMAN Phosphoacetylglucosamine mutase OS=Homo sapiens OX=9606 GN=PGM3 PE=1 SV=2;sp|O95394|AGM1_HUMAN Phosphoacetylglucosamine mutase OS=Homo sapiens OX=9606 GN=PGM3 PE=1 SV=1;tr|A0A494C0G1|A0A494C0G1_HUMAN Phosphoacetylglucosamine mutase O	H0Y987;O95394;A0A494C0G1;A0A494C1Q4;J3KN95;A0A494C1E2;A0A087WT27;H0Y8I3	18.666	H0Y987	PGM3	Phosphoacetylglucosamine mutase	19.2478	20.1431	19.8143	19.3625	18.512	19.21	19.8365	19.6739	19.2486	18.1029	19.3541	19.7575	19.4998	18.8953	18.6987	0.641742	0.306508	0.976976	19.2905	4.11695	-1.0303	0.00110789	0.00803228	0.392024	0.0567902	0.727258	19.2905	2.51494	-4.09031	0.0251563	0.0707829	-0.101822	-0.437056	0.233412	19.2905	-0.653213	-6.69335	0.524504	0.687318	-0.832759	-1.16799	-0.497525	19.2905
4272	sp|Q3YEC7|RABL6_HUMAN Rab-like protein 6 OS=Homo sapiens OX=9606 GN=RABL6 PE=1 SV=2;tr|F2Z2T0|F2Z2T0_HUMAN Rab-like protein 6 OS=Homo sapiens OX=9606 GN=RABL6 PE=1 SV=1	Q3YEC7;F2Z2T0	21.447	Q3YEC7	RABL6	Rab-like protein 6	18.7772	19.5945	19.4671	19.2636	18.9395	19.0408	19.4948	19.4485	19.0174	18.8571	18.7706	19.4176	19.3659	18.9493	19.2115	0.639414	0.406062	0.872765	19.1744	5.89298	2.21327	4.3982e-05	0.00118139	0.564286	0.330935	0.797638	19.1744	5.20059	0.992188	0.000147421	0.00250432	0.213889	-0.0194628	0.44724	19.1744	1.97124	-5.10203	0.0693837	0.183169	0.139796	-0.093555	0.373148	19.1744
4113	sp|Q15021|CND1_HUMAN Condensin complex subunit 1 OS=Homo sapiens OX=9606 GN=NCAPD2 PE=1 SV=3	Q15021	50.927	Q15021	NCAPD2	Condensin complex subunit 1	20.3555	21.0747	20.9068	20.2553	20.487	20.3499	21.019	20.799	20.1845	20.3802	20.4049	20.9331	20.7221	20.2346	20.7736	0.638822	0.446984	0.830659	20.592	7.16158	4.26813	5.69192e-06	0.00035876	0.439204	0.247366	0.631042	20.592	4.92375	0.486979	0.000243478	0.00331954	-0.145306	-0.337144	0.0465314	20.592	-1.62897	-5.62918	0.126242	0.275522	0.17685	-0.0149879	0.368687	20.592
4079	sp|Q14674|ESPL1_HUMAN Separin OS=Homo sapiens OX=9606 GN=ESPL1 PE=1 SV=3	Q14674	1.955	Q14674	ESPL1	Separin	14.0989	14.8406	14.644	14.1164	14.3959	14.1332	14.6673	14.599	14.0605	14.2603	14.2383	14.873	14.7202	14.152	14.6109	0.636857	0.448182	0.825531	14.4274	7.25926	4.41677	4.90656e-06	0.000318726	0.497631	0.308957	0.686306	14.4274	5.67229	1.82979	6.42073e-05	0.00146526	-0.0471427	-0.235817	0.141531	14.4274	-0.53736	-6.76478	0.599697	0.745785	0.26557	0.0768954	0.454244	14.4274
3413	tr|Q5T5C7|Q5T5C7_HUMAN Seryl-tRNA synthetase OS=Homo sapiens OX=9606 GN=SARS1 PE=1 SV=1;sp|P49591|SYSC_HUMAN Serine--tRNA ligase, cytoplasmic OS=Homo sapiens OX=9606 GN=SARS1 PE=1 SV=3	Q5T5C7;P49591	28.499	Q5T5C7	SARS1	Seryl-tRNA synthetase	19.2041	19.9809	19.7066	19.297	18.5942	19.2036	19.7512	19.7061	19.1651	18.418	19.2148	19.7981	19.4606	19.0478	18.7539	0.635907	0.420336	0.851479	19.2868	6.34403	2.97054	2.07296e-05	0.000754083	0.416952	0.20138	0.632524	19.2868	4.15965	-0.95138	0.00102073	0.00831073	-0.0375189	-0.253091	0.178053	19.2868	-0.374301	-6.84256	0.713949	0.824949	-0.618792	-0.834363	-0.40322	19.2868
578	tr|A0A2R8YFH5|A0A2R8YFH5_HUMAN Protein transport protein SEC23 OS=Homo sapiens OX=9606 GN=SEC23B PE=1 SV=1;sp|Q15437|SC23B_HUMAN Protein transport protein Sec23B OS=Homo sapiens OX=9606 GN=SEC23B PE=1 SV=2	A0A2R8YFH5;Q15437	71.822	A0A2R8YFH5	SEC23B	Protein transport protein SEC23	20.6537	21.3529	21.0742	20.8181	20.0152	20.6712	21.3082	21.0373	20.5136	19.7775	20.6647	21.2359	20.864	20.5155	20.4541	0.635807	0.343465	0.92815	20.7304	4.67731	0.032287	0.000383712	0.00422756	0.328626	0.0362838	0.620969	20.7304	2.41754	-4.26563	0.0302977	0.0807136	-0.047472	-0.339815	0.244871	20.7304	-0.349227	-6.85211	0.732264	0.837061	-0.580901	-0.873243	-0.288558	20.7304
1402	tr|E5RJV7|E5RJV7_HUMAN Serine/threonine-protein kinase Sgk3 (Fragment) OS=Homo sapiens OX=9606 GN=SGK3 PE=1 SV=8;tr|E5RK28|E5RK28_HUMAN Serine/threonine-protein kinase Sgk3 (Fragment) OS=Homo sapiens OX=9606 GN=SGK3 PE=1 SV=1;tr|E5RHX2|E5RHX2_HUMAN Serine/	E5RJV7;E5RK28;E5RHX2;E5RHY6;Q96BR1	3.8571	E5RJV7	SGK3	Serine/threonine-protein kinase Sgk3 (Fragment)	12.3149	13.0027	12.666	12.9363	11.9368	11.9465	12.9041	12.8541	12.7206	11.7953	12.2155	12.4668	12.689	12.6888	11.836	0.632238	0.350189	0.914287	12.4649	4.8208	0.299434	0.000294159	0.00361932	0.577392	0.295344	0.859441	12.4649	4.40261	-0.488032	0.000642575	0.00619953	0.622935	0.340886	0.904983	12.4649	4.74986	0.107512	0.000335357	0.00412937	-0.302934	-0.584982	-0.0208848	12.4649
2417	sp|O43592|XPOT_HUMAN Exportin-T OS=Homo sapiens OX=9606 GN=XPOT PE=1 SV=2	O43592	58.739	O43592	XPOT	Exportin-T	20.185	20.9824	20.8495	20.269	19.367	20.2293	20.8529	20.6504	20.1475	19.1071	20.2623	20.7376	20.5849	19.9102	19.9029	0.63213	0.290621	0.973639	20.2692	3.98077	-1.29215	0.0014403	0.0094428	0.469387	0.127877	0.810896	20.2692	2.95591	-3.2703	0.0106918	0.039101	-0.116621	-0.458131	0.224888	20.2692	-0.734409	-6.63553	0.475166	0.645796	-0.766524	-1.10803	-0.425015	20.2692
878	sp|O14879|IFIT3_HUMAN Interferon-induced protein with tetratricopeptide repeats 3 OS=Homo sapiens OX=9606 GN=IFIT3 PE=1 SV=1;tr|A0A7P0T855|A0A7P0T855_HUMAN Interferon-induced protein with tetratricopeptide repeats 3 OS=Homo sapiens OX=9606 GN=IFIT3 PE=4 SV	O14879;A0A7P0T855;A0A7P0T7D6	64.852	O14879	IFIT3	Interferon-induced protein with tetratricopeptide repeats 3	23.3998	24.0778	23.6356	22.8266	20.7761	23.4637	24.0576	23.4706	21.8247	20.0846	23.4574	24.0776	23.226	21.2704	19.9975	0.630745	0.0021294	1.25936	22.6431	2.1579	-4.71523	0.0493308	0.101336	0.00381608	-0.6248	0.632432	22.6431	0.0130556	-6.84027	0.989773	0.994116	-1.46638	-2.09499	-0.837762	22.6431	-5.01676	0.602532	0.000205476	0.00297964	-3.15422	-3.78284	-2.52561	22.6431
495	tr|A0A1W2PPZ5|A0A1W2PPZ5_HUMAN Transcription elongation factor A protein 1 OS=Homo sapiens OX=9606 GN=TCEA1 PE=1 SV=1;sp|P23193|TCEA1_HUMAN Transcription elongation factor A protein 1 OS=Homo sapiens OX=9606 GN=TCEA1 PE=1 SV=2;tr|A0A1W2PRL9|A0A1W2PRL9_HUMA	A0A1W2PPZ5;P23193;A0A1W2PRL9	41.684	A0A1W2PPZ5	TCEA1	Transcription elongation factor A protein 1	20.1117	20.8761	20.5807	20.0832	19.7363	20.1141	20.7239	20.596	19.893	19.7465	20.1337	20.6479	20.5307	19.7834	19.992	0.629489	0.435906	0.823073	20.2366	6.99331	4.00891	7.37249e-06	0.000419047	0.449299	0.255715	0.642882	20.2366	4.99148	0.611475	0.000215151	0.00314189	-0.199938	-0.393522	-0.00635488	20.2366	-2.22122	-4.68248	0.0438568	0.132633	-0.294894	-0.488478	-0.101311	20.2366
5262	sp|Q96EN8|MOCOS_HUMAN Molybdenum cofactor sulfurase OS=Homo sapiens OX=9606 GN=MOCOS PE=1 SV=2	Q96EN8	4.9727	Q96EN8	MOCOS	Molybdenum cofactor sulfurase	16.0062	16.8032	16.5697	16.2124	15.7174	16.024	16.6183	16.5093	16.0626	15.6372	16.1075	16.5995	16.3993	15.8525	15.986	0.627773	0.401438	0.854109	16.207	5.96503	2.3362	3.89284e-05	0.00110607	0.446872	0.220536	0.673208	16.207	4.24613	-0.785937	0.000865128	0.00745368	-0.00338515	-0.229721	0.222951	16.207	-0.0321653	-6.9161	0.974807	0.988178	-0.265705	-0.492041	-0.0393694	16.207
3303	sp|P40925|MDHC_HUMAN Malate dehydrogenase, cytoplasmic OS=Homo sapiens OX=9606 GN=MDH1 PE=1 SV=4;tr|A0A5K1VW95|A0A5K1VW95_HUMAN Malate dehydrogenase OS=Homo sapiens OX=9606 GN=MDH1 PE=1 SV=1;tr|B9A041|B9A041_HUMAN Malate dehydrogenase, cytoplasmic OS=Homo	P40925;A0A5K1VW95;B9A041;B8ZZ51;C9JF79	51.179	P40925	MDH1	Malate dehydrogenase, cytoplasmic	23.2609	24.0999	24.1676	23.66	22.7108	23.2614	23.8479	24.0817	23.3984	22.5033	23.3046	23.7611	23.9584	23.4012	23.2826	0.627318	0.289359	0.965276	23.5133	3.99196	-1.27059	0.00140948	0.00929818	0.793562	0.455603	1.13152	23.5133	5.04987	0.718332	0.000193485	0.00294653	0.210875	-0.127084	0.548834	23.5133	1.34191	-6.01824	0.201589	0.375568	-0.443425	-0.781384	-0.105466	23.5133
1018	sp|Q99829|CPNE1_HUMAN Copine-1 OS=Homo sapiens OX=9606 GN=CPNE1 PE=1 SV=1;tr|B0QZ18|B0QZ18_HUMAN Copine-1 OS=Homo sapiens OX=9606 GN=CPNE1 PE=1 SV=1;tr|F2Z2V0|F2Z2V0_HUMAN Copine-1 (Fragment) OS=Homo sapiens OX=9606 GN=CPNE1 PE=1 SV=1;tr|A6PVH9|A6PVH9_HUMA	Q99829;B0QZ18;F2Z2V0;A6PVH9;E7ENH5;Q5JX44;Q5JX58;Q5JX59;Q5JX60;Q5JX56;Q5JX45	18.717	Q99829	CPNE1	Copine-1	20.6751	21.503	21.1872	20.5974	19.8513	20.5557	21.0823	21.1818	20.1896	19.7012	20.6454	21.172	20.9843	20.2892	20.3721	0.627034	0.284134	0.969934	20.6658	3.93266	-1.38489	0.00158077	0.0099932	0.492349	0.149449	0.835249	20.6658	3.08794	-3.0188	0.00825383	0.0325175	-0.266698	-0.609597	0.0762024	20.6658	-1.67269	-5.56538	0.117214	0.262279	-0.650531	-0.993431	-0.307631	20.6658
2149	tr|K7EJH0|K7EJH0_HUMAN Kinetochore protein Spc24 (Fragment) OS=Homo sapiens OX=9606 GN=SPC24 PE=1 SV=1;tr|K7EMX1|K7EMX1_HUMAN Kinetochore protein Spc24 (Fragment) OS=Homo sapiens OX=9606 GN=SPC24 PE=1 SV=1;tr|K7EJV2|K7EJV2_HUMAN Kinetochore protein Spc24 (	K7EJH0;K7EMX1;K7EJV2;K7ESQ2;Q8NBT2;K7ERQ7;A0A0A0MSN0	11.356	K7EJH0	SPC24	Kinetochore protein Spc24 (Fragment)	17.7058	18.3876	18.082	17.5139	18.1597	17.5601	18.1918	18.105	17.4504	18.1564	17.6979	18.2645	18.0059	17.4162	18.1224	0.626681	0.48233	0.771033	17.9213	9.33661	7.27697	2.74163e-07	5.87746e-05	0.409698	0.265347	0.554049	17.9213	6.10388	2.56891	3.08316e-05	0.000888365	-0.194414	-0.338765	-0.0500623	17.9213	-2.89647	-3.45202	0.01201	0.052984	0.491545	0.347194	0.635897	17.9213
1870	tr|H0YDU8|H0YDU8_HUMAN Serine/threonine-protein phosphatase (Fragment) OS=Homo sapiens OX=9606 GN=PPP5C PE=1 SV=1;sp|P53041|PPP5_HUMAN Serine/threonine-protein phosphatase 5 OS=Homo sapiens OX=9606 GN=PPP5C PE=1 SV=1;tr|A8MU39|A8MU39_HUMAN Serine/threonine	H0YDU8;P53041;A8MU39	23.762	H0YDU8	PPP5C	Serine/threonine-protein phosphatase (Fragment)	19.8878	20.679	20.4778	20.0022	19.7088	19.8779	20.4565	20.4514	19.7692	19.3677	19.756	20.2661	20.155	19.7117	19.7232	0.626652	0.35049	0.902815	20.0194	4.88006	0.409067	0.00026378	0.00336518	0.520857	0.244694	0.79702	20.0194	4.05617	-1.15003	0.00124529	0.00932737	-0.0128734	-0.289036	0.263289	20.0194	-0.100251	-6.91131	0.921607	0.958826	-0.24066	-0.516823	0.0355026	20.0194
2501	sp|O60701|UGDH_HUMAN UDP-glucose 6-dehydrogenase OS=Homo sapiens OX=9606 GN=UGDH PE=1 SV=1	O60701	46.577	O60701	UGDH	UDP-glucose 6-dehydrogenase	20.6223	21.368	21.1654	20.8043	20.4174	20.7212	21.3395	21.0881	20.7438	20.2308	20.6956	21.2077	21.0616	20.6058	20.7406	0.625355	0.398424	0.852286	20.8542	5.92647	2.2705	4.15525e-05	0.00114019	0.425306	0.198375	0.652237	20.8542	4.03061	-1.19921	0.00130819	0.00965604	0.0382488	-0.188682	0.26518	20.8542	0.362483	-6.84714	0.72256	0.831234	-0.216779	-0.44371	0.0101518	20.8542
2165	tr|K7EN78|K7EN78_HUMAN R3H domain-containing protein 4 OS=Homo sapiens OX=9606 GN=R3HDM4 PE=1 SV=1;sp|Q96D70|R3HD4_HUMAN R3H domain-containing protein 4 OS=Homo sapiens OX=9606 GN=R3HDM4 PE=1 SV=3	K7EN78;Q96D70	2.9413	K7EN78	R3HDM4	R3H domain-containing protein 4	13.7559	14.509	14.3334	14.1981	13.5751	14.0167	14.4275	14.1191	13.5664	13.4168	13.8917	14.6022	14.027	14.104	13.9565	0.624805	0.27736	0.97225	14.0333	3.86742	-1.51081	0.00179391	0.0108555	0.271756	-0.0756892	0.619201	14.0333	1.68211	-5.47759	0.115342	0.211333	0.0681077	-0.279337	0.415553	14.0333	0.421573	-6.8228	0.679921	0.802443	-0.238619	-0.586064	0.108826	14.0333
833	tr|A0A7I2V4C8|A0A7I2V4C8_HUMAN Signal transducer and activator of transcription OS=Homo sapiens OX=9606 GN=STAT3 PE=1 SV=1;tr|A0A7I2YQI1|A0A7I2YQI1_HUMAN Signal transducer and activator of transcription OS=Homo sapiens OX=9606 GN=STAT3 PE=1 SV=1;tr|A0A7I2Y	A0A7I2V4C8;A0A7I2YQI1;A0A7I2YQR5;A0A7I2V444;A0A7I2V3V0;P40763;A0A7I2V395;A0A7I2V552;A0A7I2V4R3;A0A7I2V2G1;A0A7I2V5N9;G8JLH9;A0A7I2YQD2;A0A7I2V4R2;A0A7I2V2T1;A0A7I2V4F6	27.942	A0A7I2V4C8	STAT3	Signal transducer and activator of transcription	19.3722	20.0789	19.6641	19.2057	18.8647	19.2947	19.9459	19.5232	18.9248	18.5873	19.4126	19.9224	19.4606	18.6108	18.959	0.622567	0.343901	0.901234	19.3218	4.80468	0.269536	0.000303036	0.00366754	0.189454	-0.0892126	0.46812	19.3218	1.46212	-5.78745	0.16642	0.276541	-0.446078	-0.724745	-0.167412	19.3218	-3.44262	-2.40223	0.00411289	0.0244014	-0.556164	-0.83483	-0.277498	19.3218
1603	tr|F2Z2Y4|F2Z2Y4_HUMAN Pyridoxal kinase OS=Homo sapiens OX=9606 GN=PDXK PE=1 SV=1;sp|O00764|PDXK_HUMAN Pyridoxal kinase OS=Homo sapiens OX=9606 GN=PDXK PE=1 SV=1	F2Z2Y4;O00764	13.624	F2Z2Y4	PDXK	Pyridoxal kinase	16.6025	17.5055	17.1482	16.424	16.1681	16.5998	17.1622	17.0927	16.4525	15.996	16.7296	17.1306	16.8456	16.4125	16.2066	0.622111	0.397236	0.846986	16.6984	5.94963	2.30999	3.99549e-05	0.00111071	0.384864	0.159989	0.609739	16.6984	3.68069	-1.87507	0.00258053	0.0149047	-0.214302	-0.439176	0.0105733	16.6984	-2.0495	-4.97345	0.0602041	0.165985	-0.520412	-0.745287	-0.295537	16.6984
1471	sp|Q8TAG9|EXOC6_HUMAN Exocyst complex component 6 OS=Homo sapiens OX=9606 GN=EXOC6 PE=1 SV=3;tr|E7EW84|E7EW84_HUMAN Exocyst complex component OS=Homo sapiens OX=9606 GN=EXOC6 PE=1 SV=1	Q8TAG9;E7EW84	5.6553	Q8TAG9	EXOC6	Exocyst complex component 6	17.3209	17.5956	17.7183	17.334	17.053	17.0846	18.4052	17.483	17.2927	16.6865	17.2924	17.5604	17.5585	16.9368	17.2561	0.621136	0.187768	1.0545	17.3719	3.08243	-3.02603	0.00834356	0.0289981	0.353974	-0.0793942	0.787342	17.3719	1.75662	-5.36616	0.101451	0.192157	-0.0447884	-0.478157	0.38858	17.3719	-0.222265	-6.89044	0.827409	0.898701	-0.234097	-0.667466	0.199271	17.3719
4189	sp|Q15785|TOM34_HUMAN Mitochondrial import receptor subunit TOM34 OS=Homo sapiens OX=9606 GN=TOMM34 PE=1 SV=2	Q15785	38.983	Q15785	TOMM34	Mitochondrial import receptor subunit TOM34	19.1249	19.8416	19.6025	19.0479	18.6673	19.1195	19.6725	19.4742	18.678	18.5626	19.0761	19.6662	19.376	18.658	19.4647	0.619926	0.22794	1.01191	19.2021	3.4012	-2.41281	0.00446125	0.0192162	0.377357	-0.0146293	0.769343	19.2021	2.07035	-4.86609	0.0579538	0.127804	-0.312176	-0.704162	0.0798102	19.2021	-1.71274	-5.50596	0.109442	0.249984	-0.208658	-0.600644	0.183329	19.2021
1582	tr|E9PQC4|E9PQC4_HUMAN Kinetochore protein Nuf2 OS=Homo sapiens OX=9606 GN=NUF2 PE=1 SV=1;sp|Q9BZD4|NUF2_HUMAN Kinetochore protein Nuf2 OS=Homo sapiens OX=9606 GN=NUF2 PE=1 SV=2;tr|E9PKH1|E9PKH1_HUMAN Kinetochore protein Nuf2 (Fragment) OS=Homo sapiens OX=	E9PQC4;Q9BZD4;E9PKH1;B1AQT3;B1AQT4;E9PP32	10.949	E9PQC4	NUF2	Kinetochore protein Nuf2	16.7863	17.3388	17.0943	16.7445	17.169	16.6637	17.2209	17.138	16.5855	17.275	16.7179	17.4589	17.1132	16.7805	17.3069	0.616883	0.454343	0.779424	17.0262	8.16213	5.72847	1.31661e-06	0.000152392	0.39255	0.23001	0.555091	17.0262	5.19393	0.980151	0.000149193	0.00250763	-0.0191234	-0.181664	0.143417	17.0262	-0.253026	-6.8827	0.804031	0.88621	0.527676	0.365135	0.690217	17.0262
6438	sp|Q9Y3Z3|SAMH1_HUMAN Deoxynucleoside triphosphate triphosphohydrolase SAMHD1 OS=Homo sapiens OX=9606 GN=SAMHD1 PE=1 SV=2;tr|A0A2R8YCS7|A0A2R8YCS7_HUMAN Deoxynucleoside triphosphate triphosphohydrolase SAMHD1 OS=Homo sapiens OX=9606 GN=SAMHD1 PE=1 SV=1;tr|	Q9Y3Z3;A0A2R8YCS7;A0A2R8YD90	70.979	Q9Y3Z3	SAMHD1	Deoxynucleoside triphosphate triphosphohydrolase SAMHD1	21.435	22.1073	21.7587	20.8516	19.5377	21.3531	22.0102	21.6001	19.9887	19.0219	21.4277	21.9482	21.4883	19.6576	19.2049	0.616623	0.140953	1.09229	20.8927	2.7879	-3.58359	0.0148429	0.0424674	0.210412	-0.265259	0.686082	20.8927	0.95132	-6.37551	0.358035	0.481744	-1.23931	-1.71498	-0.763644	20.8927	-5.60323	1.65889	7.23778e-05	0.00142649	-2.15045	-2.62612	-1.67478	20.8927
2848	sp|P08138|TNR16_HUMAN Tumor necrosis factor receptor superfamily member 16 OS=Homo sapiens OX=9606 GN=NGFR PE=1 SV=1	P08138	8.0212	P08138	NGFR	Tumor necrosis factor receptor superfamily member 16	15.3487	15.9825	15.5628	15.6657	16.3719	15.5473	16.1098	15.9613	16.3679	16.8251	15.5753	16.2249	16.0029	16.3972	16.8653	0.615286	0.211639	1.01893	16.0539	3.27822	-2.65015	0.00568006	0.0225069	0.351873	-0.0517741	0.75552	16.0539	1.87477	-5.1834	0.0824518	0.164308	0.653136	0.249489	1.05678	16.0539	3.47989	-2.32992	0.00382298	0.0231782	1.19702	0.793373	1.60067	16.0539
6493	sp|Q9Y617|SERC_HUMAN Phosphoserine aminotransferase OS=Homo sapiens OX=9606 GN=PSAT1 PE=1 SV=2	Q9Y617	78.36	Q9Y617	PSAT1	Phosphoserine aminotransferase	22.487	23.3452	23.1063	22.758	21.565	22.4036	22.9161	23.0215	22.4305	21.4854	22.4747	22.9498	22.7298	22.2459	21.7454	0.615251	0.309062	0.921439	22.511	4.32142	-0.639446	0.000749549	0.00627391	0.497381	0.191192	0.80357	22.511	3.49352	-2.23746	0.00372212	0.018959	0.0229887	-0.2832	0.329177	22.511	0.161469	-6.90281	0.874097	0.930052	-0.856543	-1.16273	-0.550355	22.511
4077	sp|Q14651|PLSI_HUMAN Plastin-1 OS=Homo sapiens OX=9606 GN=PLS1 PE=1 SV=2;tr|C9JAM8|C9JAM8_HUMAN Plastin-1 (Fragment) OS=Homo sapiens OX=9606 GN=PLS1 PE=1 SV=1	Q14651;C9JAM8	22.191	Q14651	PLS1	Plastin-1	18.5802	19.3871	19.2233	18.8779	18.2297	18.7033	19.1748	19.1876	18.705	18.1158	18.5855	19.1471	18.9496	18.6327	18.5164	0.613323	0.373794	0.852853	18.8011	5.50672	1.54166	8.56602e-05	0.00163983	0.497171	0.257642	0.736701	18.8011	4.46385	-0.372009	0.000572373	0.00577544	0.115514	-0.124016	0.355043	18.8011	1.03714	-6.36654	0.317752	0.504566	-0.3357	-0.57523	-0.0961704	18.8011
3161	sp|P28838|AMPL_HUMAN Cytosol aminopeptidase OS=Homo sapiens OX=9606 GN=LAP3 PE=1 SV=3	P28838	81.478	P28838	LAP3	Cytosol aminopeptidase	22.9235	23.6749	23.5654	23.0008	22.3622	22.9425	23.5111	23.4534	22.7928	22.2666	22.9717	23.4855	23.2462	22.3853	22.1079	0.611277	0.328998	0.893556	22.9793	4.65718	-0.00538013	0.000398371	0.0043277	0.475772	0.193493	0.758051	22.9793	3.6248	-1.98329	0.00287834	0.0160493	-0.219597	-0.501876	0.0626818	22.9793	-1.67306	-5.56484	0.11714	0.262205	-0.700306	-0.982585	-0.418027	22.9793
3904	sp|Q12955|ANK3_HUMAN Ankyrin-3 OS=Homo sapiens OX=9606 GN=ANK3 PE=1 SV=3	Q12955	48.102	Q12955	ANK3	Ankyrin-3	19.5151	20.1911	20.3645	20.3728	19.8351	19.5643	20.1914	20.4183	20.5472	20.0004	19.5996	20.1232	20.3542	20.679	19.8052	0.608903	0.439857	0.777949	20.1041	7.74652	5.1384	2.38241e-06	0.000223036	0.819337	0.650291	0.988383	20.1041	10.4237	8.5684	7.27881e-08	2.33993e-05	0.973349	0.804303	1.1424	20.1041	12.383	10.6414	8.61861e-09	4.98783e-06	0.32058	0.151535	0.489626	20.1041
2757	sp|P00492|HPRT_HUMAN Hypoxanthine-guanine phosphoribosyltransferase OS=Homo sapiens OX=9606 GN=HPRT1 PE=1 SV=2	P00492	27.358	P00492	HPRT1	Hypoxanthine-guanine phosphoribosyltransferase	21.0558	21.9016	21.6631	21.1405	20.5376	21.0191	21.5044	21.6021	20.8749	20.4118	21.0298	21.5226	21.4311	20.6637	21.0134	0.608	0.273576	0.942423	21.1581	3.90994	-1.42873	0.0016519	0.0102595	0.530536	0.196113	0.864959	21.1581	3.41178	-2.39557	0.00436953	0.0212049	-0.141833	-0.476256	0.192591	21.1581	-0.912101	-6.48754	0.377593	0.562901	-0.38064	-0.715063	-0.0462166	21.1581
1202	tr|C9J5D1|C9J5D1_HUMAN N-alpha-acetyltransferase 50 OS=Homo sapiens OX=9606 GN=NAA50 PE=1 SV=1;tr|E7EQ69|E7EQ69_HUMAN N-alpha-acetyltransferase 50 OS=Homo sapiens OX=9606 GN=NAA50 PE=1 SV=1;sp|Q9GZZ1|NAA50_HUMAN N-alpha-acetyltransferase 50 OS=Homo sapiens	C9J5D1;E7EQ69;Q9GZZ1;A0A087WWJ2;C9JZU6;B0AZT5	13.483	C9J5D1	NAA50	N-alpha-acetyltransferase 50	20.2756	21.0039	20.7193	20.1806	19.7969	20.0483	20.7498	20.5432	20.0178	19.5452	20.226	20.6198	20.5394	20.0948	20.3894	0.60785	0.250735	0.964965	20.3167	3.66059	-1.91085	0.00268386	0.0140947	0.417348	0.0602329	0.774464	20.3167	2.51335	-4.09319	0.0252331	0.0708685	-0.0855724	-0.442688	0.271543	20.3167	-0.515333	-6.77686	0.61459	0.756645	-0.272787	-0.629903	0.0843282	20.3167
4265	sp|Q3KQV9|UAP1L_HUMAN UDP-N-acetylhexosamine pyrophosphorylase-like protein 1 OS=Homo sapiens OX=9606 GN=UAP1L1 PE=1 SV=2	Q3KQV9	24.635	Q3KQV9	UAP1L1	UDP-N-acetylhexosamine pyrophosphorylase-like protein 1	19.4857	20.2723	20.5986	20.0285	19.4284	19.4247	20.084	20.4312	20.1444	19.2905	19.5431	19.9191	20.356	19.7994	19.5522	0.607323	0.372174	0.842471	19.8905	5.55444	1.62576	7.88002e-05	0.00158247	0.977446	0.742297	1.21259	19.8905	8.93951	6.77194	4.58248e-07	5.72091e-05	0.506302	0.271154	0.74145	19.8905	4.63053	-0.116405	0.000418669	0.00475088	-0.0608164	-0.295965	0.174332	19.8905
1406	tr|E5RIW3|E5RIW3_HUMAN Tubulin-specific chaperone A OS=Homo sapiens OX=9606 GN=TBCA PE=1 SV=1;tr|E5RJD8|E5RJD8_HUMAN Tubulin-specific chaperone A OS=Homo sapiens OX=9606 GN=TBCA PE=1 SV=1;sp|O75347|TBCA_HUMAN Tubulin-specific chaperone A OS=Homo sapiens OX	E5RIW3;E5RJD8;O75347;E5RHG6	13.345	E5RIW3	TBCA	Tubulin-specific chaperone A	20.8243	21.6585	21.5601	21.1395	20.3372	20.8601	21.3663	21.5687	20.8211	20.0419	20.8638	21.338	21.2807	20.7057	20.3595	0.604888	0.331756	0.87802	20.9817	4.76283	0.191779	0.000327403	0.00382012	0.6204	0.347268	0.893532	20.9817	4.88497	0.415461	0.000261412	0.00346031	0.0393679	-0.233764	0.3125	20.9817	0.309979	-6.86576	0.761273	0.857746	-0.603214	-0.876347	-0.330082	20.9817
821	tr|A0A7I2V351|A0A7I2V351_HUMAN Importin subunit alpha OS=Homo sapiens OX=9606 GN=KPNA2 PE=1 SV=1;tr|A0A7I2V487|A0A7I2V487_HUMAN Importin subunit alpha OS=Homo sapiens OX=9606 GN=KPNA2 PE=1 SV=1;tr|A0A7I2YQE1|A0A7I2YQE1_HUMAN Importin subunit alpha OS=Homo	A0A7I2V351;A0A7I2V487;A0A7I2YQE1;P52292;A0A7I2V3Z3	114.41	A0A7I2V351	KPNA2	Importin subunit alpha	21.4987	22.1391	21.6445	21.179	22.1438	21.4225	22.0024	21.6352	21.2068	21.9262	21.4369	22.0302	21.5109	20.918	21.5724	0.604518	0.348306	0.86073	21.6178	5.07427	0.765459	0.000185115	0.00270907	0.144179	-0.112033	0.40039	21.6178	1.21022	-6.10253	0.246798	0.366241	-0.351443	-0.607654	-0.095231	21.6178	-2.94998	-3.35048	0.0108167	0.0491852	0.428087	0.171875	0.684298	21.6178
4623	sp|Q712K3|UB2R2_HUMAN Ubiquitin-conjugating enzyme E2 R2 OS=Homo sapiens OX=9606 GN=UBE2R2 PE=1 SV=1	Q712K3	15.128	Q712K3	UBE2R2	Ubiquitin-conjugating enzyme E2 R2	17.0828	17.9355	17.4957	17.1015	16.5176	17.0327	17.6342	17.4906	16.9222	16.5029	17.1579	17.5169	17.4154	16.8644	17.1126	0.604394	0.293839	0.91495	17.1855	4.18547	-0.898983	0.000971484	0.00730162	0.376125	0.0655692	0.68668	17.1855	2.60469	-3.92661	0.0211697	0.0626337	-0.128461	-0.439016	0.182095	17.1855	-0.8896	-6.50786	0.389138	0.573781	-0.380072	-0.690628	-0.0695166	17.1855
962	sp|A6NDG6|PGP_HUMAN Glycerol-3-phosphate phosphatase OS=Homo sapiens OX=9606 GN=PGP PE=1 SV=1	A6NDG6	24.187	A6NDG6	PGP	Glycerol-3-phosphate phosphatase	18.2723	19.0867	18.9537	18.4466	17.7101	18.3133	18.8241	18.8191	18.262	17.4187	18.2595	18.7473	18.6776	18.0396	18.0425	0.604281	0.292573	0.91599	18.3915	4.16921	-0.930119	0.00100222	0.0074699	0.535102	0.223393	0.84681	18.3915	3.69191	-1.85335	0.00252462	0.0147065	-0.0323268	-0.344035	0.279382	18.3915	-0.223037	-6.89026	0.82682	0.89838	-0.557956	-0.869664	-0.246247	18.3915
1156	tr|C9J173|C9J173_HUMAN Inositol polyphosphate 1-phosphatase (Fragment) OS=Homo sapiens OX=9606 GN=INPP1 PE=1 SV=1;tr|B8ZZF6|B8ZZF6_HUMAN Inositol polyphosphate 1-phosphatase (Fragment) OS=Homo sapiens OX=9606 GN=INPP1 PE=1 SV=1;tr|E7ET59|E7ET59_HUMAN Inosi	C9J173;B8ZZF6;E7ET59;E7EUX4;E7ENF2;P49441;C9J128;C9J2Z6	4.4987	C9J173	INPP1	Inositol polyphosphate 1-phosphatase (Fragment)	16.9808	17.7436	17.6726	17.0806	16.4666	17.3467	17.8134	17.4516	17.0271	16.022	17.0573	17.6373	17.1052	16.5936	16.3275	0.603163	0.250842	0.955485	17.0884	3.68179	-1.86981	0.00257499	0.0137175	0.28151	-0.0708119	0.633831	17.0884	1.71837	-5.42375	0.108386	0.202374	-0.22784	-0.580161	0.124482	17.0884	-1.39076	-5.95592	0.186625	0.356558	-0.856251	-1.20857	-0.503929	17.0884
747	tr|A0A669KB77|A0A669KB77_HUMAN Microtubule-associated protein OS=Homo sapiens OX=9606 GN=MAP2 PE=1 SV=1;sp|P11137|MTAP2_HUMAN Microtubule-associated protein 2 OS=Homo sapiens OX=9606 GN=MAP2 PE=1 SV=4	A0A669KB77;P11137	85.619	A0A669KB77	MAP2	Microtubule-associated protein	20.7309	21.4559	21.4724	20.9194	20.4525	20.7238	21.2165	21.5672	20.312	20.4211	20.6274	21.2188	21.3168	20.4892	20.2328	0.603049	0.322373	0.883724	20.8771	4.62074	-0.0736609	0.000426395	0.00450902	0.758156	0.47748	1.03883	20.8771	5.80921	2.06716	5.07336e-05	0.0012618	-0.12049	-0.401165	0.160186	20.8771	-0.923228	-6.47732	0.371971	0.557037	-0.325183	-0.605858	-0.0445076	20.8771
134	tr|A0A087WZE9|A0A087WZE9_HUMAN High mobility group nucleosome-binding domain-containing protein 3 OS=Homo sapiens OX=9606 GN=HMGN3 PE=1 SV=1;sp|Q15651|HMGN3_HUMAN High mobility group nucleosome-binding domain-containing protein 3 OS=Homo sapiens OX=9606 GN	A0A087WZE9;Q15651	4.9856	A0A087WZE9	HMGN3	High mobility group nucleosome-binding domain-containing protein 3	17.7655	18.5019	18.9809	19.4355	19.9262	17.7837	18.7729	19.0823	19.7988	20.3971	17.5383	17.6198	17.9159	18.8222	18.5097	0.602396	-0.35733	1.56212	18.7234	1.34989	-5.92978	0.199081	0.290517	0.963895	0.00416868	1.92362	18.7234	2.15996	-4.71526	0.0491434	0.113388	1.65634	0.696616	2.61607	18.7234	3.71164	-1.87984	0.00242925	0.0169127	1.91517	0.95544	2.87489	18.7234
2542	sp|O75223|GGCT_HUMAN Gamma-glutamylcyclotransferase OS=Homo sapiens OX=9606 GN=GGCT PE=1 SV=1;tr|M0QZK8|M0QZK8_HUMAN Gamma-glutamylcyclotransferase OS=Homo sapiens OX=9606 PE=4 SV=1;tr|B8ZZK2|B8ZZK2_HUMAN Gamma-glutamylcyclotransferase OS=Homo sapiens OX=9	O75223;M0QZK8;B8ZZK2	19.074	O75223	GGCT	Gamma-glutamylcyclotransferase	20.7541	21.612	21.6488	21.488	20.7627	20.8662	21.376	21.5473	21.2607	20.5693	20.9191	21.3573	21.4237	21.1583	21.3282	0.601962	0.266828	0.937096	21.2048	3.8629	-1.51954	0.00180971	0.01088	0.693473	0.358339	1.02861	21.2048	4.45014	-0.397947	0.000587367	0.00587292	0.455879	0.120746	0.791013	21.2048	2.92546	-3.39705	0.0113482	0.0507321	0.040294	-0.29484	0.375428	21.2048
21	tr|A0A075B730|A0A075B730_HUMAN Epiplakin OS=Homo sapiens OX=9606 GN=EPPK1 PE=1 SV=2;sp|P58107|EPIPL_HUMAN Epiplakin OS=Homo sapiens OX=9606 GN=EPPK1 PE=1 SV=3	A0A075B730;P58107	300.79	A0A075B730	EPPK1	Epiplakin	24.4554	24.661	25.0477	24.076	24.2206	23.232	24.8165	24.1007	23.7679	24.0388	24.3675	24.3831	24.6274	23.581	23.7834	0.601916	-0.0273305	1.23116	24.2106	2.05721	-4.8844	0.059363	0.116028	0.573615	-0.0556317	1.20286	24.2106	1.96048	-5.04647	0.0707418	0.147725	-0.210002	-0.839248	0.419245	24.2106	-0.717737	-6.64792	0.48506	0.654354	-0.00406272	-0.633309	0.625184	24.2106
5782	sp|Q9H788|SH24A_HUMAN SH2 domain-containing protein 4A OS=Homo sapiens OX=9606 GN=SH2D4A PE=1 SV=1	Q9H788	8.5318	Q9H788	SH2D4A	SH2 domain-containing protein 4A	15.6429	16.3765	15.9995	15.826	14.9033	15.6394	16.1566	15.9788	15.6053	14.9153	15.7215	16.2765	15.8452	15.5647	15.8516	0.601887	0.197409	1.00636	15.7536	3.20025	-2.8002	0.00662036	0.0248791	0.273229	-0.131249	0.677706	15.7536	1.45276	-5.79995	0.16896	0.279177	-0.00261503	-0.407093	0.401863	15.7536	-0.0139042	-6.91655	0.989108	0.994907	-0.444525	-0.849002	-0.040047	15.7536
3428	sp|P49773|HINT1_HUMAN Histidine triad nucleotide-binding protein 1 OS=Homo sapiens OX=9606 GN=HINT1 PE=1 SV=2;tr|D6REP8|D6REP8_HUMAN Histidine triad nucleotide-binding protein 1 OS=Homo sapiens OX=9606 GN=HINT1 PE=1 SV=1;tr|D6RE99|D6RE99_HUMAN Histidine tr	P49773;D6REP8;D6RE99;H0YC49;D6RD60;A0A6Q8PGQ8	8.1933	P49773	HINT1	Histidine triad nucleotide-binding protein 1	20.4623	21.2033	21.3033	20.5612	19.7951	20.5518	21.0709	21.2387	20.2365	19.3521	20.4473	20.9924	20.8521	20.1623	20.0355	0.601725	0.25639	0.94706	20.551	3.74731	-1.743	0.00226599	0.0125438	0.644285	0.29895	0.98962	20.551	4.01236	-1.23433	0.00135505	0.00983762	-0.167092	-0.512427	0.178243	20.551	-1.04058	-6.36302	0.316206	0.502944	-0.759545	-1.10488	-0.41421	20.551
6152	sp|Q9UBP9|GULP1_HUMAN PTB domain-containing engulfment adapter protein 1 OS=Homo sapiens OX=9606 GN=GULP1 PE=1 SV=1;tr|H0Y6R1|H0Y6R1_HUMAN PTB domain-containing engulfment adapter protein 1 (Fragment) OS=Homo sapiens OX=9606 GN=GULP1 PE=1 SV=1	Q9UBP9;H0Y6R1	1.8912	Q9UBP9	GULP1	PTB domain-containing engulfment adapter protein 1	13.0816	12.6181	13.1593	13.8813	13.9971	12.0766	13.635	12.8222	14.2168	14.1641	12.7262	13.4357	12.6299	13.7615	13.3705	0.601468	-0.0288291	1.23177	13.3051	2.05225	-4.89262	0.0599026	0.116868	0.242307	-0.38799	0.872604	13.3051	0.826768	-6.4865	0.422631	0.54593	1.32507	0.694775	1.95537	13.3051	4.52124	-0.322768	0.000513767	0.00549688	1.21579	0.585494	1.84609	13.3051
1574	tr|E9PN81|E9PN81_HUMAN Ribonuclease H2 subunit C OS=Homo sapiens OX=9606 GN=RNASEH2C PE=1 SV=1;sp|Q8TDP1|RNH2C_HUMAN Ribonuclease H2 subunit C OS=Homo sapiens OX=9606 GN=RNASEH2C PE=1 SV=1	E9PN81;Q8TDP1	15.994	E9PN81	RNASEH2C	Ribonuclease H2 subunit C	16.2528	16.9468	16.7743	16.2238	16.0328	16.1646	16.7628	16.6128	16.0508	15.8581	16.0963	16.6055	16.6237	16.0461	16.6122	0.600462	0.275174	0.92575	16.3776	3.96991	-1.31307	0.00147085	0.00956139	0.499013	0.173725	0.824301	16.3776	3.29918	-2.61299	0.00545089	0.024649	-0.0643425	-0.38963	0.260945	16.3776	-0.425395	-6.8211	0.6772	0.801117	-0.00356583	-0.328854	0.321722	16.3776
2080	tr|J3KQ32|J3KQ32_HUMAN Obg-like ATPase 1 OS=Homo sapiens OX=9606 GN=OLA1 PE=1 SV=1;sp|Q9NTK5|OLA1_HUMAN Obg-like ATPase 1 OS=Homo sapiens OX=9606 GN=OLA1 PE=1 SV=2	J3KQ32;Q9NTK5	47.911	J3KQ32	OLA1	Obg-like ATPase 1	22.4286	23.2555	22.9413	22.5548	21.7124	22.3285	22.8942	22.8259	22.2882	21.4939	22.4266	22.827	22.724	22.2112	21.9517	0.59765	0.314376	0.880924	22.4576	4.53736	-0.230403	0.000498443	0.00489202	0.435865	0.152591	0.719139	22.4576	3.30909	-2.5939	0.0053459	0.0242604	-0.0431609	-0.326435	0.240113	22.4576	-0.327678	-6.8598	0.748142	0.848469	-0.675235	-0.958509	-0.391961	22.4576
500	tr|A0A1W2PRU0|A0A1W2PRU0_HUMAN Alpha-endosulfine OS=Homo sapiens OX=9606 GN=ENSA PE=1 SV=1;tr|A6NMQ3|A6NMQ3_HUMAN Alpha-endosulfine OS=Homo sapiens OX=9606 GN=ENSA PE=1 SV=2;tr|Q5T5H1|Q5T5H1_HUMAN Alpha-endosulfine OS=Homo sapiens OX=9606 GN=ENSA PE=1 SV=1	A0A1W2PRU0;A6NMQ3;Q5T5H1;O43768	6.9717	A0A1W2PRU0	ENSA	Alpha-endosulfine	15.2292	15.8331	16.325	15.7457	14.6871	15.8999	16.0505	16.3691	16.3514	15.2483	15.324	16.36	16.1183	16.0952	15.4994	0.596833	0.116486	1.07718	15.8091	2.67215	-3.79893	0.0185828	0.0500414	0.786438	0.306091	1.26678	15.8091	3.52105	-2.18417	0.00352655	0.0184348	0.57973	0.0993838	1.06008	15.8091	2.59558	-4.0139	0.0215447	0.0795636	-0.33943	-0.819776	0.140917	15.8091
3282	sp|P37837|TALDO_HUMAN Transaldolase OS=Homo sapiens OX=9606 GN=TALDO1 PE=1 SV=2;tr|F2Z393|F2Z393_HUMAN Transaldolase OS=Homo sapiens OX=9606 GN=TALDO1 PE=1 SV=1	P37837;F2Z393	43.222	P37837	TALDO1	Transaldolase	24.4154	25.2426	25.017	24.3976	23.627	24.4797	24.9692	24.9666	24.1619	23.3945	24.4353	24.908	24.9123	24.1088	24.1345	0.596455	0.276189	0.916721	24.478	4.00525	-1.24499	0.00137377	0.0091288	0.521827	0.201561	0.842093	24.478	3.50412	-2.21695	0.00364559	0.01886	-0.220702	-0.540968	0.0995636	24.478	-1.48204	-5.83508	0.161116	0.322638	-0.724802	-1.04507	-0.404536	24.478
5781	sp|Q9H773|DCTP1_HUMAN dCTP pyrophosphatase 1 OS=Homo sapiens OX=9606 GN=DCTPP1 PE=1 SV=1	Q9H773	30.506	Q9H773	DCTPP1	dCTP pyrophosphatase 1	19.164	19.9641	19.6757	19.2604	18.5527	19.3358	19.7744	19.5693	18.8516	18.2379	19.3774	19.9242	19.5341	19.0669	19.1703	0.59515	0.214976	0.975324	19.2973	3.36672	-2.47942	0.00477372	0.0200801	0.300626	-0.0795483	0.6808	19.2973	1.70062	-5.4502	0.111745	0.206765	-0.232769	-0.612943	0.147405	19.2973	-1.31676	-6.04966	0.209668	0.386323	-0.638757	-1.01893	-0.258584	19.2973
2882	sp|P09914|IFIT1_HUMAN Interferon-induced protein with tetratricopeptide repeats 1 OS=Homo sapiens OX=9606 GN=IFIT1 PE=1 SV=2	P09914	63.132	P09914	IFIT1	Interferon-induced protein with tetratricopeptide repeats 1	22.9085	23.5051	22.9907	22.1038	20.397	22.7093	23.3841	22.754	21.3004	19.5167	22.8667	23.3796	22.6555	20.8236	19.3129	0.594766	-0.014959	1.20449	22.0405	2.09785	-4.8166	0.0551052	0.109659	-0.0280961	-0.637822	0.581629	22.0405	-0.0991003	-6.83515	0.922504	0.947352	-1.41892	-2.02864	-0.809191	22.0405	-5.00479	0.580498	0.000210002	0.00301121	-3.08596	-3.69569	-2.47623	22.0405
4180	sp|Q15654|TRIP6_HUMAN Thyroid receptor-interacting protein 6 OS=Homo sapiens OX=9606 GN=TRIP6 PE=1 SV=3	Q15654	19.512	Q15654	TRIP6	Thyroid receptor-interacting protein 6	17.3361	17.9688	17.557	17.2033	17.3382	17.192	17.6994	17.7046	17.1847	17.2602	17.1236	17.7665	17.3593	17.2225	17.4845	0.594353	0.382893	0.805813	17.4267	6.04476	2.47138	3.40387e-05	0.00104178	0.32307	0.11161	0.53453	17.4267	3.28572	-2.63895	0.00559698	0.0250781	-0.0137146	-0.225175	0.197746	17.4267	-0.139482	-6.90632	0.891113	0.941181	0.143721	-0.0677388	0.355181	17.4267
3414	sp|P49593|PPM1F_HUMAN Protein phosphatase 1F OS=Homo sapiens OX=9606 GN=PPM1F PE=1 SV=3;tr|C9JL74|C9JL74_HUMAN Protein phosphatase 1F (Fragment) OS=Homo sapiens OX=9606 GN=PPM1F PE=1 SV=1;tr|B5MCT7|B5MCT7_HUMAN Protein phosphatase 1F OS=Homo sapiens OX=960	P49593;C9JL74;B5MCT7;A8MX49	3.6683	P49593	PPM1F	Protein phosphatase 1F	15.7622	16.6456	16.4133	15.8418	15.3366	15.6781	16.2636	16.2151	15.6884	15.1883	15.9036	16.2175	16.1317	15.6408	15.7718	0.594276	0.281374	0.907177	15.9132	4.08454	-1.09252	0.00117911	0.00829415	0.472071	0.15917	0.784973	15.9132	3.24461	-2.71813	0.00606774	0.0263349	-0.0575913	-0.370493	0.25531	15.9132	-0.395833	-6.83384	0.698365	0.814844	-0.349073	-0.661974	-0.0361714	15.9132
6072	sp|Q9NZ45|CISD1_HUMAN CDGSH iron-sulfur domain-containing protein 1 OS=Homo sapiens OX=9606 GN=CISD1 PE=1 SV=1	Q9NZ45	11.337	Q9NZ45	CISD1	CDGSH iron-sulfur domain-containing protein 1	20.3564	20.9196	20.6869	20.8532	20.7678	20.3434	20.9367	20.7732	21.1634	20.9289	20.2592	20.8839	20.8037	20.6946	20.7993	0.593735	0.385997	0.801473	20.7447	6.14666	2.6428	2.87097e-05	0.000940629	0.434943	0.227205	0.642681	20.7447	4.50277	-0.298472	0.000531923	0.00551589	0.584077	0.376339	0.791815	20.7447	6.04668	2.42649	3.39292e-05	0.000896783	0.512344	0.304606	0.720082	20.7447
3589	sp|P60174|TPIS_HUMAN Triosephosphate isomerase OS=Homo sapiens OX=9606 GN=TPI1 PE=1 SV=4	P60174	90.172	P60174	TPI1	Triosephosphate isomerase	24.8117	25.613	25.539	24.8455	23.957	24.8351	25.3668	25.4628	24.5396	23.56	24.8344	25.2812	25.2088	24.5456	24.504	0.593252	0.201337	0.985167	24.8603	3.25545	-2.69402	0.00593997	0.0231844	0.576472	0.184557	0.968386	24.8603	3.16337	-2.8743	0.00711773	0.0294085	-0.18349	-0.575405	0.208424	24.8603	-1.0069	-6.39704	0.331556	0.519746	-0.820058	-1.21197	-0.428143	24.8603
3930	sp|Q13158|FADD_HUMAN FAS-associated death domain protein OS=Homo sapiens OX=9606 GN=FADD PE=1 SV=1	Q13158	6.8271	Q13158	FADD	FAS-associated death domain protein	11.4449	12.0932	12.5168	11.6876	11.4905	11.3193	12.0301	12.2464	12.0204	11.0348	11.4945	11.9128	11.9993	11.46	11.7182	0.592439	0.21886	0.966017	11.7646	3.41055	-2.39474	0.00438009	0.019014	0.834606	0.461028	1.20818	11.7646	4.80466	0.266784	0.000303048	0.00382839	0.303095	-0.0704836	0.676673	11.7646	1.74486	-5.45767	0.103541	0.24014	-0.00508765	-0.378666	0.368491	11.7646
4842	sp|Q8IYS1|P20D2_HUMAN Peptidase M20 domain-containing protein 2 OS=Homo sapiens OX=9606 GN=PM20D2 PE=1 SV=2	Q8IYS1	2.8565	Q8IYS1	PM20D2	Peptidase M20 domain-containing protein 2	15.6467	16.3929	15.7053	15.244	15.3849	15.3237	16.0202	15.738	15.2913	15.1914	15.6052	15.9384	15.6759	15.377	15.5836	0.591965	0.324857	0.859074	15.6079	4.76619	0.198025	0.000325375	0.00382012	0.181223	-0.0858858	0.448332	15.6079	1.45911	-5.79147	0.167232	0.277356	-0.221103	-0.488212	0.0460052	15.6079	-1.78021	-5.40386	0.0973727	0.230608	-0.138561	-0.405669	0.128548	15.6079
5843	sp|Q9HBM1|SPC25_HUMAN Kinetochore protein Spc25 OS=Homo sapiens OX=9606 GN=SPC25 PE=1 SV=1;tr|C9JW94|C9JW94_HUMAN Kinetochore protein Spc25 (Fragment) OS=Homo sapiens OX=9606 GN=SPC25 PE=1 SV=1	Q9HBM1;C9JW94	8.4521	Q9HBM1	SPC25	Kinetochore protein Spc25	17.0088	17.6258	17.5099	16.7567	17.4454	17.0475	17.5401	17.3182	16.7336	17.3875	16.9319	17.5975	17.3065	16.8096	17.4487	0.591738	0.448922	0.734554	17.2312	8.91075	6.73502	4.75923e-07	8.18845e-05	0.382082	0.239265	0.524898	17.2312	5.75362	1.97111	5.5807e-05	0.0013358	-0.229459	-0.372275	-0.0866427	17.2312	-3.45533	-2.37756	0.00401158	0.0239117	0.4311	0.288284	0.573916	17.2312
4778	sp|Q8IU85|KCC1D_HUMAN Calcium/calmodulin-dependent protein kinase type 1D OS=Homo sapiens OX=9606 GN=CAMK1D PE=1 SV=1	Q8IU85	4.3709	Q8IU85	CAMK1D	Calcium/calmodulin-dependent protein kinase type 1D	15.059	15.8792	15.8773	15.3615	14.6183	14.998	15.5312	15.7757	15.5723	14.1851	15.0592	15.4809	15.7619	15.4073	15.0234	0.591706	0.245666	0.937746	15.306	3.67741	-1.87828	0.00259709	0.0137978	0.766212	0.420172	1.11225	15.306	4.76195	0.187421	0.000327934	0.00405428	0.408296	0.0622555	0.754336	15.306	2.53753	-4.12013	0.0240896	0.0865431	-0.429814	-0.775854	-0.0837735	15.306
2297	sp|O14737|PDCD5_HUMAN Programmed cell death protein 5 OS=Homo sapiens OX=9606 GN=PDCD5 PE=1 SV=3;tr|K7ESJ4|K7ESJ4_HUMAN Programmed cell death protein 5 OS=Homo sapiens OX=9606 GN=PDCD5 PE=1 SV=1;tr|K7EQA1|K7EQA1_HUMAN Programmed cell death protein 5 OS=Hom	O14737;K7ESJ4;K7EQA1	13.974	O14737	PDCD5	Programmed cell death protein 5	20.1182	20.8748	20.5956	20.217	19.8876	20.0394	20.5395	20.5216	20.0069	19.7362	20.0931	20.6077	20.3896	19.9161	20.234	0.590405	0.323867	0.856943	20.2518	4.7638	0.193584	0.000326815	0.00382012	0.418704	0.152166	0.685242	20.2518	3.3784	-2.4601	0.00466553	0.0221163	-0.0369127	-0.303451	0.229625	20.2518	-0.297837	-6.86965	0.770326	0.86321	-0.130983	-0.397521	0.135555	20.2518
3505	sp|P52888|THOP1_HUMAN Thimet oligopeptidase OS=Homo sapiens OX=9606 GN=THOP1 PE=1 SV=2;tr|K7EP46|K7EP46_HUMAN Thimet oligopeptidase OS=Homo sapiens OX=9606 GN=THOP1 PE=1 SV=1;tr|K7EKB6|K7EKB6_HUMAN Thimet oligopeptidase (Fragment) OS=Homo sapiens OX=9606 G	P52888;K7EP46;K7EKB6	21.726	P52888	THOP1	Thimet oligopeptidase	19.621	20.4025	20.2266	19.7492	19.0596	19.57	20.1391	20.1231	19.3929	19.0067	19.6298	20.0474	19.8925	19.4006	19.3283	0.589388	0.320672	0.858104	19.706	4.71705	0.106493	0.000356396	0.00405871	0.473772	0.205055	0.742488	19.706	3.79173	-1.66017	0.0020782	0.012859	-0.0927372	-0.361453	0.175979	19.706	-0.742203	-6.62965	0.470583	0.642585	-0.475395	-0.744111	-0.206679	19.706
3775	sp|Q00653|NFKB2_HUMAN Nuclear factor NF-kappa-B p100 subunit OS=Homo sapiens OX=9606 GN=NFKB2 PE=1 SV=4	Q00653	25.16	Q00653	NFKB2	Nuclear factor NF-kappa-B p100 subunit	17.1353	17.8566	17.1878	16.9414	16.1874	17.074	17.5854	17.1504	16.5262	15.8788	17.0589	17.5919	17.0065	16.2161	16.1749	0.588598	0.2717	0.905496	16.9048	3.9945	-1.2657	0.00140259	0.00926233	0.0254974	-0.2914	0.342395	16.9048	0.173037	-6.82448	0.86517	0.906606	-0.528189	-0.845087	-0.211291	16.9048	-3.58454	-2.12671	0.00311423	0.0200052	-1.00904	-1.32593	-0.692139	16.9048
6279	sp|Q9ULC5|ACSL5_HUMAN Long-chain-fatty-acid--CoA ligase 5 OS=Homo sapiens OX=9606 GN=ACSL5 PE=1 SV=1	Q9ULC5	8.2392	Q9ULC5	ACSL5	Long-chain-fatty-acid--CoA ligase 5	12.0313	12.5207	12.0086	11.4064	9.82395	11.9253	12.4983	11.4669	10.2711	10.0372	11.9971	12.6994	11.4643	10.857	10.7741	0.588226	0.0217177	1.15474	11.4521	2.23306	-4.58642	0.0428981	0.0913036	-0.337965	-0.904473	0.228544	11.4521	-1.283	-6.01621	0.220915	0.338605	-1.13973	-1.70624	-0.573226	11.4521	-4.32673	-0.692801	0.000742013	0.00711394	-1.77284	-2.33935	-1.20633	11.4521
3467	sp|P51397|DAP1_HUMAN Death-associated protein 1 OS=Homo sapiens OX=9606 GN=DAP PE=1 SV=3	P51397	2.2029	P51397	DAP	Death-associated protein 1	17.6355	18.2697	18.1975	17.6904	17.5204	17.508	18.0241	18.182	18.2163	17.3883	17.6851	18.2982	17.9908	17.8377	17.6012	0.587761	0.324125	0.851396	17.8697	4.79468	0.250973	0.000308682	0.00370768	0.513918	0.250282	0.777553	17.8697	4.19231	-0.888848	0.000958853	0.00798041	0.30528	0.0416443	0.568915	17.8697	2.49033	-4.20588	0.02637	0.0921112	-0.106209	-0.369844	0.157426	17.8697
6205	sp|Q9UHY7|ENOPH_HUMAN Enolase-phosphatase E1 OS=Homo sapiens OX=9606 GN=ENOPH1 PE=1 SV=1;tr|A0A0C4DGY8|A0A0C4DGY8_HUMAN Enolase-phosphatase E1 OS=Homo sapiens OX=9606 GN=ENOPH1 PE=1 SV=1;tr|D6RA00|D6RA00_HUMAN Enolase-phosphatase E1 OS=Homo sapiens OX=9606	Q9UHY7;A0A0C4DGY8;D6RA00	17.342	Q9UHY7	ENOPH1	Enolase-phosphatase E1	17.1361	17.832	17.6392	17.21	16.491	16.9035	17.4517	17.5108	16.9844	16.158	16.9656	17.4838	17.458	16.9108	17.0278	0.587448	0.213554	0.961342	17.1442	3.37897	-2.45576	0.00466027	0.0197256	0.534268	0.160374	0.908162	17.1442	3.07308	-3.0472	0.00849799	0.0333148	0.03334	-0.340554	0.407234	17.1442	0.19177	-6.89713	0.850755	0.915777	-0.442795	-0.816689	-0.068901	17.1442
4193	sp|Q15819|UB2V2_HUMAN Ubiquitin-conjugating enzyme E2 variant 2 OS=Homo sapiens OX=9606 GN=UBE2V2 PE=1 SV=4;tr|G3V113|G3V113_HUMAN Ubiquitin-conjugating enzyme E2 variant 2 OS=Homo sapiens OX=9606 GN=UBE2V2 PE=1 SV=1;tr|H0YBP9|H0YBP9_HUMAN Ubiquitin-conjug	Q15819;G3V113;H0YBP9	6.1839	Q15819	UBE2V2	Ubiquitin-conjugating enzyme E2 variant 2	20.1678	20.9471	20.8234	20.4072	19.5296	20.0702	20.6866	20.8285	20.2054	19.4914	20.1888	20.5533	20.552	20.0229	20.0339	0.586759	0.269791	0.903726	20.3005	3.98114	-1.29144	0.00143927	0.0094428	0.592356	0.275388	0.909324	20.3005	4.01911	-1.22133	0.00133751	0.00977716	0.0695645	-0.247403	0.386532	20.3005	0.471993	-6.7992	0.644412	0.778578	-0.457336	-0.774304	-0.140368	20.3005
2815	sp|P05783|K1C18_HUMAN Keratin, type I cytoskeletal 18 OS=Homo sapiens OX=9606 GN=KRT18 PE=1 SV=2;tr|F8VZY9|F8VZY9_HUMAN Keratin, type I cytoskeletal 18 OS=Homo sapiens OX=9606 GN=KRT18 PE=1 SV=1	P05783;F8VZY9	119.44	P05783	KRT18	Keratin, type I cytoskeletal 18	25.4018	25.5141	24.6688	23.5655	25.2673	24.2562	25.7122	23.8886	23.3137	24.8705	25.2047	25.3963	24.3233	23.6803	25.1044	0.58664	0.0429087	1.13037	24.6778	2.32033	-4.43438	0.0364196	0.0810655	-0.660683	-1.20441	-0.116952	24.6778	-2.6132	-3.91099	0.0208251	0.0619597	-1.43444	-1.97817	-0.890707	24.6778	-5.67362	1.78259	6.40593e-05	0.00131975	0.126519	-0.417212	0.67025	24.6778
790	sp|P41250|GARS_HUMAN Glycine--tRNA ligase OS=Homo sapiens OX=9606 GN=GARS1 PE=1 SV=3;tr|A0A6Q8PGA8|A0A6Q8PGA8_HUMAN Diadenosine tetraphosphate synthetase OS=Homo sapiens OX=9606 GN=GARS1 PE=1 SV=1;tr|A0A6Q8PGI6|A0A6Q8PGI6_HUMAN Diadenosine tetraphosphate s	P41250;A0A6Q8PGA8;A0A6Q8PGI6;A0A6Q8PGZ8;A0A6Q8PHH9;A0A6Q8PGW4;A0A6Q8PHI7;H7C443;A0A6Q8PFZ6	51.195	P41250	GARS1	Glycine--tRNA ligase	21.9331	22.7083	22.4118	22.3211	21.8175	21.9742	22.4364	22.3697	22.1148	21.8134	21.9463	22.4639	22.1301	21.8611	22.1838	0.584952	0.308891	0.861014	22.1657	4.55699	-0.193437	0.00048042	0.00482229	0.352624	0.0765626	0.628685	22.1657	2.74707	-3.66324	0.0160696	0.0518315	0.14776	-0.128301	0.423822	22.1657	1.15111	-6.24482	0.269516	0.456313	-0.0129509	-0.289012	0.26311	22.1657
3609	sp|P61086|UBE2K_HUMAN Ubiquitin-conjugating enzyme E2 K OS=Homo sapiens OX=9606 GN=UBE2K PE=1 SV=3;tr|D6RDM7|D6RDM7_HUMAN Ubiquitin-conjugating enzyme E2 K (Fragment) OS=Homo sapiens OX=9606 GN=UBE2K PE=1 SV=1	P61086;D6RDM7	21.58	P61086	UBE2K	Ubiquitin-conjugating enzyme E2 K	20.0519	20.908	20.7046	20.0497	19.5574	20.0264	20.4278	20.6708	19.9226	19.3933	20.0146	20.5087	20.4556	19.7129	20.0114	0.583891	0.254066	0.913716	20.1611	3.80725	-1.62709	0.00201641	0.0116802	0.579399	0.249574	0.909224	20.1611	3.77796	-1.68682	0.00213469	0.013094	-0.1359	-0.465725	0.193925	20.1611	-0.886136	-6.51095	0.390937	0.575307	-0.376949	-0.706774	-0.0471238	20.1611
5395	sp|Q96R06|SPAG5_HUMAN Sperm-associated antigen 5 OS=Homo sapiens OX=9606 GN=SPAG5 PE=1 SV=2	Q96R06	20.581	Q96R06	SPAG5	Sperm-associated antigen 5	17.257	17.8724	17.475	17.0744	17.7201	17.2264	17.7684	17.5394	17.0925	17.6086	17.2531	17.8449	17.4079	16.9682	17.4104	0.583032	0.417443	0.748621	17.4346	7.57224	4.88407	3.07427e-06	0.00025728	0.228583	0.0629943	0.394172	17.4346	2.96877	-3.2459	0.0104261	0.0383938	-0.200481	-0.366069	-0.0348917	17.4346	-2.60378	-3.99883	0.0212068	0.0788567	0.334183	0.168594	0.499772	17.4346
3357	sp|P46734|MP2K3_HUMAN Dual specificity mitogen-activated protein kinase kinase 3 OS=Homo sapiens OX=9606 GN=MAP2K3 PE=1 SV=2;tr|J3KRV4|J3KRV4_HUMAN Dual-specificity mitogen-activated protein kinase kinase 3 (Fragment) OS=Homo sapiens OX=9606 GN=MAP2K3 PE=1	P46734;J3KRV4;P52564	5.8838	P46734	MAP2K3	Dual specificity mitogen-activated protein kinase kinase 3	15.2539	15.9414	15.9125	15.1976	15.0362	15.5582	15.8888	15.7287	15.1004	14.9255	15.2017	15.9293	15.4382	15.0185	15.0962	0.581898	0.335053	0.828743	15.4151	5.06974	0.757204	0.000186639	0.00271266	0.355213	0.108368	0.602058	15.4151	3.09477	-3.00574	0.00814393	0.0322538	-0.232434	-0.479279	0.0144106	15.4151	-2.02506	-5.01389	0.0629427	0.170508	-0.31864	-0.565485	-0.0717949	15.4151
2711	sp|O95671|ASML_HUMAN Probable bifunctional dTTP/UTP pyrophosphatase/methyltransferase protein OS=Homo sapiens OX=9606 GN=ASMTL PE=1 SV=3	O95671	12.372	O95671	ASMTL	Probable bifunctional dTTP/UTP pyrophosphatase/methyltransferase protein	15.6639	16.4237	16.174	15.8877	15.7031	15.8378	16.2685	16.059	15.7544	15.6129	15.7032	16.2542	15.9507	15.9344	15.7808	0.580515	0.40332	0.75771	15.9339	7.04571	4.09006	6.79914e-06	0.000393485	0.326277	0.149082	0.503472	15.9339	3.96003	-1.33515	0.00149922	0.0104862	0.123861	-0.0533343	0.301056	15.9339	1.5033	-5.80613	0.155614	0.315188	-0.0360352	-0.21323	0.14116	15.9339
2955	sp|P13639|EF2_HUMAN Elongation factor 2 OS=Homo sapiens OX=9606 GN=EEF2 PE=1 SV=4	P13639	132.29	P13639	EEF2	Elongation factor 2	25.2838	26.0678	25.8509	25.3281	24.8304	25.3665	25.8524	25.7002	25.1627	24.656	25.3729	25.8437	25.5537	25.0696	25.3002	0.580217	0.28468	0.875753	25.4159	4.22223	-0.828668	0.000905527	0.00703857	0.360543	0.0650063	0.65608	25.4159	2.62367	-3.89175	0.0204086	0.0610055	-0.154299	-0.449835	0.141238	25.4159	-1.12283	-6.276	0.280933	0.469401	-0.412224	-0.707761	-0.116687	25.4159
1660	sp|Q86XA9|HTR5A_HUMAN HEAT repeat-containing protein 5A OS=Homo sapiens OX=9606 GN=HEATR5A PE=1 SV=2;tr|F5H619|F5H619_HUMAN HEAT repeat-containing protein 5A OS=Homo sapiens OX=9606 GN=HEATR5A PE=1 SV=1;tr|H7C5W6|H7C5W6_HUMAN HEAT repeat-containing protein	Q86XA9;F5H619;H7C5W6	14.015	Q86XA9	HEATR5A	HEAT repeat-containing protein 5A	16.2358	16.8633	16.7771	16.142	16.1378	16.1878	16.7715	16.6258	16.3791	15.7798	16.241	16.7691	16.5335	16.0855	15.9307	0.579758	0.367608	0.791908	16.364	5.87714	2.18615	4.5182e-05	0.00120106	0.423923	0.211773	0.636073	16.364	4.29741	-0.688085	0.000784569	0.00699629	-0.0193384	-0.231489	0.192812	16.364	-0.196038	-6.89625	0.847478	0.91395	-0.272109	-0.48426	-0.0599592	16.364
3273	sp|P36915|GNL1_HUMAN Guanine nucleotide-binding protein-like 1 OS=Homo sapiens OX=9606 GN=GNL1 PE=1 SV=2;tr|A0A140T8Y2|A0A140T8Y2_HUMAN Guanine nucleotide-binding protein-like 1 (Fragment) OS=Homo sapiens OX=9606 GN=GNL1 PE=1 SV=1	P36915;A0A140T8Y2	24.544	P36915	GNL1	Guanine nucleotide-binding protein-like 1	18.2943	19.0751	18.8492	18.4642	17.6345	18.3147	18.8093	18.7619	18.259	17.5651	18.2698	18.7332	18.596	18.1139	18.1095	0.579582	0.284636	0.874528	18.39	4.22606	-0.821339	0.000898917	0.00701288	0.442757	0.147811	0.737702	18.39	3.22839	-2.74935	0.00626425	0.0269308	-0.0138838	-0.308829	0.281062	18.39	-0.101235	-6.91121	0.920841	0.958638	-0.523242	-0.818187	-0.228296	18.39
1159	tr|B8ZZQ6|B8ZZQ6_HUMAN Prothymosin alpha OS=Homo sapiens OX=9606 GN=PTMA PE=1 SV=1;sp|P06454|PTMA_HUMAN Prothymosin alpha OS=Homo sapiens OX=9606 GN=PTMA PE=1 SV=2;tr|B8ZZA1|B8ZZA1_HUMAN Prothymosin alpha OS=Homo sapiens OX=9606 GN=PTMA PE=1 SV=1;tr|B8ZZW7	B8ZZQ6;P06454;B8ZZA1;B8ZZW7;H7C2N1	62.116	B8ZZQ6	PTMA	Prothymosin alpha	22.2727	22.9126	22.654	21.7579	21.3604	21.948	22.6115	22.6045	21.4078	21.0643	22.0851	22.5195	22.6008	21.9941	22.3844	0.579279	0.0321875	1.12637	22.1452	2.27715	-4.50994	0.0395006	0.0858664	0.517866	-0.0292258	1.06496	22.1452	2.03573	-4.92349	0.0617335	0.134058	-0.381972	-0.929064	0.16512	22.1452	-1.50153	-5.80855	0.156065	0.3157	-0.498879	-1.04597	0.0482131	22.1452
1962	tr|H3BSW6|H3BSW6_HUMAN Cytoplasmic tRNA 2-thiolation protein 2 OS=Homo sapiens OX=9606 GN=CTU2 PE=1 SV=1;sp|Q2VPK5|CTU2_HUMAN Cytoplasmic tRNA 2-thiolation protein 2 OS=Homo sapiens OX=9606 GN=CTU2 PE=1 SV=1	H3BSW6;Q2VPK5	9.0603	H3BSW6	CTU2	Cytoplasmic tRNA 2-thiolation protein 2	15.1034	15.7911	15.5463	14.9583	14.8307	15.011	15.5819	15.3544	14.7015	14.8003	15.0418	15.5198	15.2421	14.5618	15.1748	0.578873	0.314967	0.84278	15.148	4.71733	0.107025	0.000356208	0.00405871	0.328863	0.0649565	0.592769	15.148	2.67996	-3.7879	0.0183039	0.0565734	-0.311553	-0.57546	-0.0476469	15.148	-2.5389	-4.11764	0.0240264	0.0863802	-0.116802	-0.380709	0.147104	15.148
4176	sp|Q15645|PCH2_HUMAN Pachytene checkpoint protein 2 homolog OS=Homo sapiens OX=9606 GN=TRIP13 PE=1 SV=2	Q15645	26.92	Q15645	TRIP13	Pachytene checkpoint protein 2 homolog	19.7334	20.3945	20.0778	19.495	19.6963	19.7088	20.2987	19.8883	19.382	19.6208	19.7864	20.2692	19.8152	19.2091	19.9426	0.577941	0.368095	0.787787	19.8212	5.92304	2.26465	4.17944e-05	0.0011419	0.184262	-0.0255841	0.394109	19.8212	1.88842	-5.16182	0.0804765	0.161792	-0.380829	-0.590676	-0.170983	19.8212	-3.90294	-1.50876	0.00167447	0.012645	0.0103645	-0.199482	0.220211	19.8212
5679	sp|Q9H074|PAIP1_HUMAN Polyadenylate-binding protein-interacting protein 1 OS=Homo sapiens OX=9606 GN=PAIP1 PE=1 SV=1	Q9H074	15.639	Q9H074	PAIP1	Polyadenylate-binding protein-interacting protein 1	19.5537	20.3488	20.246	19.959	19.533	19.8129	20.2216	20.248	19.9049	19.3381	19.573	20.101	20.0162	19.5246	19.8393	0.577238	0.277889	0.876587	19.8813	4.14706	-0.972551	0.00104568	0.00770461	0.523524	0.224175	0.822873	19.8813	3.76116	-1.71931	0.00220568	0.0134131	0.149639	-0.149709	0.448988	19.8813	1.07506	-6.32722	0.301043	0.488496	-0.0764261	-0.375775	0.222923	19.8813
1655	tr|F5H5D3|F5H5D3_HUMAN Tubulin alpha chain OS=Homo sapiens OX=9606 GN=TUBA1C PE=1 SV=1;sp|Q9BQE3|TBA1C_HUMAN Tubulin alpha-1C chain OS=Homo sapiens OX=9606 GN=TUBA1C PE=1 SV=1;tr|A0A1W2PQM2|A0A1W2PQM2_HUMAN Tubulin alpha-1C chain OS=Homo sapiens OX=9606 GN	F5H5D3;Q9BQE3;A0A1W2PQM2	116	F5H5D3	TUBA1C	Tubulin alpha chain	25.8753	26.5531	26.3995	25.6871	25.3144	25.7304	26.3316	26.4221	25.6029	25.0407	25.8701	26.3227	26.261	25.5808	25.7299	0.577195	0.292491	0.861899	25.9148	4.36005	-0.565955	0.000696526	0.00601262	0.5356	0.250896	0.820304	25.9148	4.04585	-1.16989	0.00127031	0.00947079	-0.201631	-0.486335	0.0830737	25.9148	-1.52309	-5.77892	0.150635	0.308044	-0.463614	-0.748319	-0.17891	25.9148
745	sp|P42224|STAT1_HUMAN Signal transducer and activator of transcription 1-alpha/beta OS=Homo sapiens OX=9606 GN=STAT1 PE=1 SV=2;tr|A0A669KBA4|A0A669KBA4_HUMAN Signal transducer and activator of transcription OS=Homo sapiens OX=9606 GN=STAT1 PE=1 SV=1;tr|A0A	P42224;A0A669KBA4;A0A669KB53;A0A669KB56;A0A669KB68;A0A669KBI6;J3KPM9;A0A669KB52;A0A669KB75;E7EPD2	149.89	P42224	STAT1	Signal transducer and activator of transcription 1-alpha/beta	24.1963	24.9389	24.8572	23.8988	22.2532	24.0834	24.6458	24.6811	23.2351	21.6209	24.1825	24.6077	24.548	22.9349	21.8258	0.576741	0.134318	1.01916	23.7673	2.80353	-3.55431	0.0143978	0.0415991	0.541388	0.0989647	0.983811	23.7673	2.63168	-3.877	0.0200951	0.0604399	-0.797804	-1.24023	-0.35538	23.7673	-3.87812	-1.55684	0.00175704	0.0132214	-2.2541	-2.69652	-1.81168	23.7673
3222	sp|Q14409|GLPK3_HUMAN Glycerol kinase 3 OS=Homo sapiens OX=9606 GN=GK3P PE=2 SV=2;sp|P32189|GLPK_HUMAN Glycerol kinase OS=Homo sapiens OX=9606 GN=GK PE=1 SV=3;tr|H7C2A0|H7C2A0_HUMAN Glycerol kinase (Fragment) OS=Homo sapiens OX=9606 GN=GK PE=1 SV=8	Q14409;P32189;H7C2A0	6.5604	Q14409	GK3P	Glycerol kinase 3	16.2751	16.8691	16.6992	16.5931	16.6898	16.2505	16.9493	16.5179	16.6645	16.7688	16.4466	16.8826	16.6641	16.9543	16.6171	0.576228	0.375674	0.776783	16.6561	6.17909	2.69704	2.72036e-05	0.000913181	0.302937	0.102382	0.503491	16.6561	3.24849	-2.71067	0.00602168	0.0262108	0.413211	0.212656	0.613766	16.6561	4.431	-0.494011	0.000608982	0.0061897	0.367799	0.167244	0.568353	16.6561
5099	sp|Q8WYP3|RIN2_HUMAN Ras and Rab interactor 2 OS=Homo sapiens OX=9606 GN=RIN2 PE=1 SV=1	Q8WYP3	2.4625	Q8WYP3	RIN2	Ras and Rab interactor 2	16.8088	17.5122	17.4491	17.1037	16.2822	16.7921	17.4848	17.4626	17.1094	16.0014	16.8416	17.169	17.4839	16.795	16.4901	0.574464	0.31051	0.838417	16.9857	4.68056	0.0383581	0.0003814	0.00422148	0.651023	0.387069	0.914976	16.9857	5.30434	1.179	0.000122471	0.00222792	0.188524	-0.0754294	0.452478	16.9857	1.53604	-5.76098	0.14745	0.303875	-0.556256	-0.82021	-0.292302	16.9857
2514	sp|O60869|EDF1_HUMAN Endothelial differentiation-related factor 1 OS=Homo sapiens OX=9606 GN=EDF1 PE=1 SV=1	O60869	6.5868	O60869	EDF1	Endothelial differentiation-related factor 1	19.7758	20.459	20.1708	19.6481	19.3479	19.7392	20.2844	20.1719	19.6911	19.1013	19.8198	20.3137	20.0691	19.6389	19.6361	0.574102	0.350685	0.797519	19.8578	5.52631	1.57621	8.27723e-05	0.0016114	0.35902	0.135603	0.582438	19.8578	3.45593	-2.3102	0.0040069	0.0198228	-0.118875	-0.342292	0.104543	19.8578	-1.14429	-6.2524	0.272236	0.459574	-0.416488	-0.639906	-0.193071	19.8578
6050	tr|U3KQ24|U3KQ24_HUMAN Pyroglutamyl-peptidase 1 OS=Homo sapiens OX=9606 GN=PGPEP1 PE=1 SV=2;tr|U3KQG9|U3KQG9_HUMAN Pyroglutamyl-peptidase I OS=Homo sapiens OX=9606 GN=PGPEP1 PE=1 SV=1;tr|S4R2Y9|S4R2Y9_HUMAN Pyroglutamyl-peptidase I OS=Homo sapiens OX=9606	U3KQ24;U3KQG9;S4R2Y9;Q9NXJ5	1.9354	U3KQ24	PGPEP1	Pyroglutamyl-peptidase 1	15.337	16.1394	16.0814	15.7711	14.5556	15.3069	15.7351	15.9871	15.6058	14.1491	15.3535	15.8438	15.8214	15.3814	14.8457	0.573649	0.239576	0.907721	15.461	3.69291	-1.84829	0.00251969	0.013502	0.630832	0.296759	0.964904	15.461	4.06103	-1.1407	0.0012337	0.00927385	0.253585	-0.0804873	0.587657	15.461	1.63247	-5.62411	0.125497	0.274651	-0.815681	-1.14975	-0.481609	15.461
2698	sp|O95486|SC24A_HUMAN Protein transport protein Sec24A OS=Homo sapiens OX=9606 GN=SEC24A PE=1 SV=2	O95486	26.292	O95486	SEC24A	Protein transport protein Sec24A	18.4033	19.0659	18.7227	18.3272	18.0015	18.2926	18.8825	18.6336	18.2371	17.8383	18.3789	18.8466	18.6233	18.0988	18.1572	0.573392	0.37971	0.767074	18.434	6.36685	3.00808	1.99702e-05	0.000750484	0.301626	0.107944	0.495308	18.434	3.34921	-2.51646	0.0049407	0.0229261	-0.137238	-0.33092	0.0564443	18.434	-1.52387	-5.77785	0.150442	0.307847	-0.359237	-0.552919	-0.165555	18.434
5281	sp|Q96FZ2|HMCES_HUMAN Abasic site processing protein HMCES OS=Homo sapiens OX=9606 GN=HMCES PE=1 SV=1;tr|E7EMP6|E7EMP6_HUMAN Abasic site processing protein HMCES OS=Homo sapiens OX=9606 GN=HMCES PE=1 SV=1;tr|D6R9T3|D6R9T3_HUMAN Abasic site processing prote	Q96FZ2;E7EMP6;D6R9T3;D6RAZ3	20.344	Q96FZ2	HMCES	Abasic site processing protein HMCES	19.7021	20.4264	20.2729	19.6275	18.973	19.6021	20.111	20.2467	19.3035	18.9911	19.6831	20.1696	20.1652	19.6946	19.8839	0.573236	0.162095	0.984376	19.7902	2.99851	-3.18603	0.00983592	0.0322659	0.565888	0.154747	0.977028	19.7902	2.96008	-3.26239	0.010605	0.038895	-0.12055	-0.53169	0.29059	19.7902	-0.630579	-6.70834	0.538763	0.69933	-0.379743	-0.790883	0.0313976	19.7902
4205	sp|Q16204|CCDC6_HUMAN Coiled-coil domain-containing protein 6 OS=Homo sapiens OX=9606 GN=CCDC6 PE=1 SV=2	Q16204	65.73	Q16204	CCDC6	Coiled-coil domain-containing protein 6	20.3339	21.0808	20.7789	20.4553	19.9483	20.3853	20.9129	20.8736	20.1929	19.8953	20.3893	20.8314	20.6409	20.1231	20.1241	0.572201	0.3596	0.784801	20.4644	5.78825	2.03325	5.25874e-05	0.00127775	0.394983	0.182382	0.607583	20.4644	3.99555	-1.2667	0.00139975	0.010025	-0.112402	-0.325002	0.100199	20.4644	-1.13703	-6.26042	0.275154	0.462416	-0.380262	-0.592863	-0.167662	20.4644
5593	sp|Q9BW83|IFT27_HUMAN Intraflagellar transport protein 27 homolog OS=Homo sapiens OX=9606 GN=IFT27 PE=1 SV=1;tr|H0Y6C7|H0Y6C7_HUMAN Intraflagellar transport protein 27 homolog (Fragment) OS=Homo sapiens OX=9606 GN=IFT27 PE=1 SV=1;tr|F5GZ09|F5GZ09_HUMAN Int	Q9BW83;H0Y6C7;F5GZ09	4.718	Q9BW83	IFT27	Intraflagellar transport protein 27 homolog	17.534	18.2686	18.3042	17.9775	17.5854	17.8222	18.3116	18.243	17.6505	17.2992	17.5417	18.0312	17.9881	17.5962	17.5492	0.571192	0.29476	0.847624	17.8468	4.44382	-0.407066	0.000594422	0.00550814	0.545857	0.269424	0.822289	17.8468	4.24671	-0.78482	0.000864163	0.00745368	0.108795	-0.167637	0.385228	17.8468	0.846417	-6.5456	0.41196	0.592529	-0.154688	-0.431121	0.121744	17.8468
4950	sp|Q8NDC0|MISSL_HUMAN MAPK-interacting and spindle-stabilizing protein-like OS=Homo sapiens OX=9606 GN=MAPK1IP1L PE=1 SV=4	Q8NDC0	4.7281	Q8NDC0	MAPK1IP1L	MAPK-interacting and spindle-stabilizing protein-like	16.327	16.4851	16.6184	16.3416	15.833	15.909	16.3344	16.3233	15.9493	15.8603	15.2204	16.3389	16.1864	15.7466	15.9957	0.567286	0.0953864	1.03919	16.098	2.58533	-3.95866	0.0219745	0.0568425	0.557232	0.0853323	1.02913	16.098	2.53951	-4.0457	0.0239984	0.0683353	0.193708	-0.278192	0.665608	16.098	0.882798	-6.51392	0.392675	0.576515	0.0775281	-0.394372	0.549428	16.098
2282	sp|O14545|TRAD1_HUMAN TRAF-type zinc finger domain-containing protein 1 OS=Homo sapiens OX=9606 GN=TRAFD1 PE=1 SV=1;tr|F8VNX8|F8VNX8_HUMAN TRAF-type zinc finger domain-containing protein 1 (Fragment) OS=Homo sapiens OX=9606 GN=TRAFD1 PE=1 SV=1;tr|F8VVF3|F8	O14545;F8VNX8;F8VVF3	50.562	O14545	TRAFD1	TRAF-type zinc finger domain-containing protein 1	19.3373	20.0751	19.6197	19.1421	18.3167	19.5491	19.9705	19.7771	18.7943	18.243	19.402	19.9443	19.4983	18.8339	18.8688	0.567159	0.256302	0.878017	19.2915	3.9238	-1.40198	0.00160813	0.010106	0.202233	-0.108625	0.51309	19.2915	1.39911	-5.87047	0.18416	0.297298	-0.506056	-0.816914	-0.195199	19.2915	-3.50107	-2.28881	0.00366746	0.0225721	-0.95332	-1.26418	-0.642462	19.2915
5733	sp|Q9H3K6|BOLA2_HUMAN BolA-like protein 2 OS=Homo sapiens OX=9606 GN=BOLA2 PE=1 SV=1;tr|A0A087WZT3|A0A087WZT3_HUMAN BolA-like protein 2 OS=Homo sapiens OX=9606 GN=BOLA2B PE=1 SV=2;tr|H3BV85|H3BV85_HUMAN BolA-like protein 2 OS=Homo sapiens OX=9606 GN=BOLA2B	Q9H3K6;A0A087WZT3;H3BV85;H3BTW0;A0A0B4J295;H3BVE0	20.705	Q9H3K6	BOLA2	BolA-like protein 2	20.7191	21.5544	21.579	20.9534	20.3128	20.8711	21.3061	21.3666	20.8767	20.0761	20.8599	21.2884	21.1408	20.6433	20.7217	0.566287	0.240668	0.891905	20.9513	3.74016	-1.75685	0.00229783	0.0126649	0.545457	0.219838	0.871076	20.9513	3.60258	-2.02631	0.00300616	0.0165829	0.00780228	-0.317816	0.333421	20.9513	0.0515317	-6.91524	0.959651	0.980103	-0.446481	-0.7721	-0.120862	20.9513
2782	sp|P04075|ALDOA_HUMAN Fructose-bisphosphate aldolase A OS=Homo sapiens OX=9606 GN=ALDOA PE=1 SV=2;tr|H3BQN4|H3BQN4_HUMAN Fructose-bisphosphate aldolase OS=Homo sapiens OX=9606 GN=ALDOA PE=1 SV=1;tr|J3KPS3|J3KPS3_HUMAN Fructose-bisphosphate aldolase OS=Homo	P04075;H3BQN4;J3KPS3;H3BPS8;H3BUH7;H3BR04	141.71	P04075	ALDOA	Fructose-bisphosphate aldolase A	26.1685	27.0791	26.7606	26.3726	25.3953	26.2886	26.6244	26.9577	26.0169	25.0192	26.1632	26.6153	26.6268	25.9973	25.7197	0.566179	0.200861	0.931496	26.2537	3.33308	-2.54436	0.00509974	0.0207842	0.574912	0.209595	0.94023	26.2537	3.3845	-2.44831	0.00460996	0.0219862	-0.077826	-0.443143	0.287491	26.2537	-0.45816	-6.80593	0.654069	0.785475	-0.828677	-1.19399	-0.46336	26.2537
3197	sp|P30520|PURA2_HUMAN Adenylosuccinate synthetase isozyme 2 OS=Homo sapiens OX=9606 GN=ADSS2 PE=1 SV=3	P30520	75.38	P30520	ADSS2	Adenylosuccinate synthetase isozyme 2	20.4114	21.1459	21.0261	20.4983	20.0705	20.4516	20.9794	20.8931	20.3471	19.7546	20.4164	20.8516	20.8281	20.1957	20.4884	0.565794	0.253857	0.877732	20.5572	3.9008	-1.44635	0.00168141	0.0103853	0.489312	0.177374	0.801249	20.5572	3.3735	-2.46955	0.00471058	0.0222329	-0.0794698	-0.391407	0.232468	20.5572	-0.547895	-6.75883	0.592639	0.740333	-0.321991	-0.633928	-0.0100532	20.5572
1357	tr|D6RCP9|D6RCP9_HUMAN Deoxycytidine kinase OS=Homo sapiens OX=9606 GN=DCK PE=1 SV=1;tr|D6RFG8|D6RFG8_HUMAN Deoxycytidine kinase OS=Homo sapiens OX=9606 GN=DCK PE=1 SV=1;sp|P27707|DCK_HUMAN Deoxycytidine kinase OS=Homo sapiens OX=9606 GN=DCK PE=1 SV=1	D6RCP9;D6RFG8;P27707	5.044	D6RCP9	DCK	Deoxycytidine kinase	17.729	18.5715	18.378	17.7425	17.2357	17.7948	18.1974	18.1903	17.4852	17.0896	17.7773	18.2278	18.0794	17.2928	17.6909	0.565191	0.235216	0.895165	17.8321	3.68364	-1.86622	0.00256568	0.0137023	0.44885	0.118876	0.778825	17.8321	2.92539	-3.32813	0.0113498	0.0407359	-0.260201	-0.590175	0.0697738	17.8321	-1.69586	-5.53111	0.11266	0.255003	-0.428303	-0.758278	-0.0983284	17.8321
1183	tr|C9J0J7|C9J0J7_HUMAN Profilin OS=Homo sapiens OX=9606 GN=PFN2 PE=1 SV=1;tr|G5E9Q6|G5E9Q6_HUMAN Profilin OS=Homo sapiens OX=9606 GN=PFN2 PE=1 SV=1	C9J0J7;G5E9Q6	57.653	C9J0J7	PFN2	Profilin	21.5783	22.3197	22.3756	21.7359	21.0098	21.5641	22.0735	22.2272	21.533	20.6587	21.6136	22.0569	22.1537	21.6073	21.4044	0.56467	0.257142	0.872198	21.7275	3.94887	-1.35364	0.00153195	0.00979275	0.666806	0.359278	0.974335	21.7275	4.66313	0.00299475	0.000393977	0.00456912	0.040049	-0.267479	0.347577	21.7275	0.280072	-6.87508	0.783635	0.8729	-0.561069	-0.868598	-0.253541	21.7275
2135	tr|J3QT56|J3QT56_HUMAN Huntingtin-interacting protein K OS=Homo sapiens OX=9606 GN=HYPK PE=1 SV=2	J3QT56	11.62	J3QT56	HYPK	Huntingtin-interacting protein K	12.7886	13.3917	12.4395	13.4969	12.6044	12.497	13.038	12.9209	12.7846	12.7548	12.9066	13.4558	12.558	12.8864	13.1189	0.564469	0.138558	0.990381	12.9095	2.85026	-3.46657	0.0131442	0.039101	-0.0912819	-0.517193	0.334629	12.9095	-0.460923	-6.72848	0.652135	0.746117	0.32523	-0.100682	0.751141	12.9095	1.64223	-5.60995	0.123442	0.27182	0.0952946	-0.330617	0.521206	12.9095
1704	tr|F8VWW8|F8VWW8_HUMAN Acid sphingomyelinase-like phosphodiesterase 3b OS=Homo sapiens OX=9606 GN=SMPDL3B PE=1 SV=1;sp|Q92485|ASM3B_HUMAN Acid sphingomyelinase-like phosphodiesterase 3b OS=Homo sapiens OX=9606 GN=SMPDL3B PE=1 SV=2;tr|Q5T0Y8|Q5T0Y8_HUMAN Ac	F8VWW8;Q92485;Q5T0Y8	15.795	F8VWW8	SMPDL3B	Acid sphingomyelinase-like phosphodiesterase 3b	17.6061	18.2497	18.0094	17.7484	17.4061	17.6971	18.1684	18.1154	17.8055	17.383	17.6909	18.268	18.0971	18.3981	17.8926	0.564015	0.23097	0.897061	17.9024	3.64209	-1.94666	0.00278264	0.0144213	0.409279	0.0762342	0.742324	17.9024	2.64289	-3.85636	0.0196646	0.0595928	0.319284	-0.0137614	0.652329	17.9024	2.06175	-4.95308	0.0588721	0.163374	-0.104132	-0.437177	0.228913	17.9024
6268	sp|Q9UKY7|CDV3_HUMAN Protein CDV3 homolog OS=Homo sapiens OX=9606 GN=CDV3 PE=1 SV=1;tr|D6RFH2|D6RFH2_HUMAN Protein CDV3 homolog OS=Homo sapiens OX=9606 GN=CDV3 PE=1 SV=1;tr|D6R9V8|D6R9V8_HUMAN Protein CDV3 homolog OS=Homo sapiens OX=9606 GN=CDV3 PE=1 SV=1;	Q9UKY7;D6RFH2;D6R9V8;H0Y8K3;D6RDN0;D6RAV0	17.907	Q9UKY7	CDV3	Protein CDV3 homolog	20.0883	20.8076	20.4232	20.0487	19.1149	20.272	20.5092	20.4833	19.863	19.1924	20.0432	20.7786	20.1132	19.9577	19.8508	0.563933	0.209499	0.918366	20.1031	3.4218	-2.37299	0.0042844	0.0188433	0.205374	-0.14906	0.559808	20.1031	1.24616	-6.06041	0.233735	0.351238	-0.178045	-0.532478	0.176389	20.1031	-1.08033	-6.32166	0.298772	0.486689	-0.748498	-1.10293	-0.394065	20.1031
4919	sp|Q8NBF2|NHLC2_HUMAN NHL repeat-containing protein 2 OS=Homo sapiens OX=9606 GN=NHLRC2 PE=1 SV=1	Q8NBF2	25.694	Q8NBF2	NHLRC2	NHL repeat-containing protein 2	18.773	19.6078	19.4301	19.0705	18.3319	18.9346	19.3388	19.3025	18.8242	18.1141	18.8788	19.3315	19.1683	18.6902	18.6809	0.563889	0.269284	0.858493	18.9652	4.1164	-1.03136	0.00110908	0.00803228	0.438167	0.143563	0.732772	18.9652	3.19863	-2.80658	0.00664143	0.0279749	-0.000485604	-0.29509	0.294119	18.9652	-0.00354492	-6.91665	0.997223	0.998635	-0.486522	-0.781127	-0.191918	18.9652
1985	tr|H7C0E5|H7C0E5_HUMAN Zinc finger protein ZPR1 (Fragment) OS=Homo sapiens OX=9606 GN=ZPR1 PE=1 SV=1;tr|H7BZM7|H7BZM7_HUMAN Zinc finger protein ZPR1 (Fragment) OS=Homo sapiens OX=9606 GN=ZPR1 PE=1 SV=1;sp|O75312|ZPR1_HUMAN Zinc finger protein ZPR1 OS=Homo	H7C0E5;H7BZM7;O75312	17.479	H7C0E5	ZPR1	Zinc finger protein ZPR1 (Fragment)	19.0392	19.8306	19.3875	18.9412	18.4883	19.0061	19.451	19.2795	18.5939	18.3046	19.021	19.4748	19.1637	18.5042	18.9343	0.563346	0.233506	0.893185	19.028	3.67312	-1.8866	0.00261896	0.0138601	0.254802	-0.0750379	0.584641	19.028	1.66135	-5.50808	0.119498	0.216334	-0.342357	-0.672197	-0.0125177	19.028	-2.23223	-4.66343	0.0429645	0.13043	-0.446371	-0.776211	-0.116531	19.028
2852	sp|P08243|ASNS_HUMAN Asparagine synthetase [glutamine-hydrolyzing] OS=Homo sapiens OX=9606 GN=ASNS PE=1 SV=4	P08243	34.462	P08243	ASNS	Asparagine synthetase [glutamine-hydrolyzing]	21.2516	21.9886	21.4647	21.0926	20.5083	21.0298	21.5843	21.3784	20.6821	20.5478	21.1856	21.5836	21.1009	20.6522	20.8985	0.563107	0.237254	0.88896	21.1299	3.71648	-1.80266	0.00240639	0.0130932	0.158972	-0.166881	0.484825	21.1299	1.04921	-6.2788	0.312362	0.434048	-0.346722	-0.672575	-0.0208687	21.1299	-2.28835	-4.56575	0.0386785	0.121474	-0.504174	-0.830027	-0.178321	21.1299
1627	tr|J3KR44|J3KR44_HUMAN Ubiquitin thioesterase OS=Homo sapiens OX=9606 GN=OTUB1 PE=1 SV=2;tr|F5GYJ8|F5GYJ8_HUMAN Ubiquitinyl hydrolase 1 OS=Homo sapiens OX=9606 GN=OTUB1 PE=1 SV=1;sp|Q96FW1|OTUB1_HUMAN Ubiquitin thioesterase OTUB1 OS=Homo sapiens OX=9606 GN	J3KR44;F5GYJ8;Q96FW1;F5H6Q1;F5GYN4	31.452	J3KR44	OTUB1	Ubiquitin thioesterase	21.6901	22.4912	22.2775	21.6921	21.0232	21.6309	22.1962	22.1249	21.4062	20.8061	21.6847	22.0075	21.9223	21.3172	21.1921	0.563065	0.2681	0.85803	21.6975	4.10536	-1.05254	0.00113284	0.00811209	0.439644	0.144679	0.734608	21.6975	3.20548	-2.79341	0.00655258	0.0277211	-0.196733	-0.491697	0.0982319	21.6975	-1.4344	-5.89885	0.174041	0.339132	-0.661439	-0.956404	-0.366474	21.6975
2982	sp|P15170|ERF3A_HUMAN Eukaryotic peptide chain release factor GTP-binding subunit ERF3A OS=Homo sapiens OX=9606 GN=GSPT1 PE=1 SV=1;tr|H3BR35|H3BR35_HUMAN Eukaryotic peptide chain release factor GTP-binding subunit ERF3A (Fragment) OS=Homo sapiens OX=9606 G	P15170;H3BR35;Q8IYD1	34.194	P15170	GSPT1	Eukaryotic peptide chain release factor GTP-binding subunit ERF3A	20.8113	21.5357	21.351	20.8877	20.4348	20.8807	21.4194	21.2868	20.9247	20.145	20.893	21.3182	21.1706	20.6388	20.9822	0.562786	0.225539	0.900032	20.9787	3.58888	-2.04969	0.00308787	0.0153095	0.407807	0.0705604	0.745053	20.9787	2.60058	-3.93415	0.0213381	0.0629163	-0.0445894	-0.381836	0.292657	20.9787	-0.284346	-6.8738	0.780426	0.870697	-0.340994	-0.67824	-0.00374776	20.9787
4455	sp|Q5VTQ0|TT39B_HUMAN Tetratricopeptide repeat protein 39B OS=Homo sapiens OX=9606 GN=TTC39B PE=1 SV=4	Q5VTQ0	5.1484	Q5VTQ0	TTC39B	Tetratricopeptide repeat protein 39B	15.2219	15.8786	16.1312	15.8312	15.0839	15.3904	15.8969	16.0086	15.7643	14.9528	15.2056	15.73	15.9419	15.6673	15.4746	0.562524	0.317537	0.807511	15.612	4.93812	0.516096	0.000237159	0.00315848	0.754578	0.509591	0.999565	15.612	6.62406	3.42403	1.31797e-05	0.000521211	0.481617	0.23663	0.726603	15.612	4.22787	-0.88209	0.000895812	0.00819359	-0.102202	-0.347189	0.142785	15.612
3006	sp|P16949|STMN1_HUMAN Stathmin OS=Homo sapiens OX=9606 GN=STMN1 PE=1 SV=3;tr|A2A2D0|A2A2D0_HUMAN Stathmin (Fragment) OS=Homo sapiens OX=9606 GN=STMN1 PE=1 SV=8	P16949;A2A2D0	25.488	P16949	STMN1	Stathmin	23.9813	24.7761	24.7699	24.171	23.3599	24.0366	24.4721	24.668	23.7315	23.135	23.9622	24.4191	24.4381	23.822	23.955	0.562391	0.178729	0.946052	24.1132	3.15248	-2.89189	0.00727151	0.0266343	0.631969	0.248307	1.01563	24.1132	3.5425	-2.14264	0.00338141	0.017886	-0.085174	-0.468836	0.298488	24.1132	-0.477443	-6.79649	0.640625	0.775769	-0.510074	-0.893735	-0.126412	24.1132
3346	sp|P45974|UBP5_HUMAN Ubiquitin carboxyl-terminal hydrolase 5 OS=Homo sapiens OX=9606 GN=USP5 PE=1 SV=2	P45974	71.25	P45974	USP5	Ubiquitin carboxyl-terminal hydrolase 5	20.1495	20.8813	20.5831	20.119	19.435	20.0717	20.5801	20.5928	19.8078	19.2964	20.0496	20.4947	20.3861	19.9596	19.9137	0.561796	0.252832	0.87076	20.1547	3.91051	-1.42762	0.00165007	0.0102582	0.430405	0.12144	0.739369	20.1547	2.99593	-3.19428	0.00988584	0.036785	-0.12806	-0.437024	0.180904	20.1547	-0.891392	-6.50626	0.38821	0.572758	-0.541863	-0.850827	-0.232899	20.1547
2333	sp|O15084|ANR28_HUMAN Serine/threonine-protein phosphatase 6 regulatory ankyrin repeat subunit A OS=Homo sapiens OX=9606 GN=ANKRD28 PE=1 SV=5;tr|B4DIW9|B4DIW9_HUMAN Serine/threonine-protein phosphatase 6 regulatory ankyrin repeat subunit A OS=Homo sapiens	O15084;B4DIW9	21.102	O15084	ANKRD28	Serine/threonine-protein phosphatase 6 regulatory ankyrin repeat subunit A	16.8873	17.5307	17.4403	17.1575	16.4526	16.8931	17.3913	17.3358	17.0886	16.3117	16.8405	17.3828	17.3732	17.022	17.0046	0.561337	0.281212	0.841462	17.0741	4.30958	-0.661978	0.000766605	0.00633793	0.509524	0.229399	0.789649	17.0741	3.91179	-1.4282	0.00164597	0.0110781	0.215765	-0.0643597	0.49589	17.0741	1.6565	-5.58913	0.120488	0.267443	-0.283975	-0.5641	-0.00385021	17.0741
1551	sp|P55786|PSA_HUMAN Puromycin-sensitive aminopeptidase OS=Homo sapiens OX=9606 GN=NPEPPS PE=1 SV=2;tr|E9PLK3|E9PLK3_HUMAN Aminopeptidase OS=Homo sapiens OX=9606 GN=NPEPPS PE=1 SV=1;tr|A0A7I2V3W8|A0A7I2V3W8_HUMAN Aminopeptidase OS=Homo sapiens OX=9606 GN=NP	P55786;E9PLK3;A0A7I2V3W8;A0A7I2V389	113.02	P55786	NPEPPS	Puromycin-sensitive aminopeptidase	21.9777	22.6936	22.4737	21.9928	21.5216	21.939	22.4719	22.4109	21.9626	21.252	21.9896	22.4243	22.2147	21.7518	21.5973	0.561166	0.334203	0.788129	22.0449	5.3174	1.20491	0.000119657	0.00202537	0.397677	0.170714	0.62464	22.0449	3.76824	-1.70561	0.00217546	0.0132674	-0.0663637	-0.293326	0.160599	22.0449	-0.628838	-6.70947	0.539869	0.699947	-0.511794	-0.738757	-0.284831	22.0449
2592	sp|O75792|RNH2A_HUMAN Ribonuclease H2 subunit A OS=Homo sapiens OX=9606 GN=RNASEH2A PE=1 SV=2	O75792	23.97	O75792	RNASEH2A	Ribonuclease H2 subunit A	18.6981	19.317	19.1989	18.7617	18.4012	18.6566	19.2243	19.0742	18.4932	18.3157	18.662	19.1563	18.9963	18.5622	18.994	0.560268	0.261294	0.859242	18.8341	4.03019	-1.197	0.00130923	0.00886615	0.417569	0.118595	0.716542	18.8341	3.00371	-3.17948	0.00973627	0.0363765	-0.0665624	-0.365536	0.232411	18.8341	-0.478805	-6.79581	0.63968	0.774772	-0.101958	-0.400931	0.197016	18.8341
2265	sp|O00499|BIN1_HUMAN Myc box-dependent-interacting protein 1 OS=Homo sapiens OX=9606 GN=BIN1 PE=1 SV=1	O00499	21.386	O00499	BIN1	Myc box-dependent-interacting protein 1	16.6138	17.3325	16.9076	16.7332	16.5325	16.6536	17.1721	16.9999	16.4751	16.269	16.5519	16.9952	16.8655	16.6801	16.6369	0.560134	0.332599	0.787669	16.7613	5.29427	1.16343	0.000124687	0.00207918	0.317884	0.0903488	0.545419	16.7613	3.00457	-3.17783	0.00971982	0.0363608	0.0230357	-0.2045	0.250571	16.7613	0.217728	-6.8915	0.830872	0.901386	-0.127015	-0.35455	0.100521	16.7613
6319	sp|Q9UNZ2|NSF1C_HUMAN NSFL1 cofactor p47 OS=Homo sapiens OX=9606 GN=NSFL1C PE=1 SV=2;tr|F2Z2K0|F2Z2K0_HUMAN NSFL1 cofactor p47 OS=Homo sapiens OX=9606 GN=NSFL1C PE=1 SV=1	Q9UNZ2;F2Z2K0	48.914	Q9UNZ2	NSFL1C	NSFL1 cofactor p47	21.6027	22.3519	22.0009	21.6088	20.823	21.5864	22.0667	21.9986	21.3452	20.6461	21.6124	22.0596	21.8583	21.4025	21.4792	0.558933	0.208852	0.909014	21.6295	3.43363	-2.35012	0.00418611	0.0185576	0.35213	0.00204869	0.702211	21.6295	2.1632	-4.70974	0.0488491	0.112918	-0.148323	-0.498404	0.201759	21.6295	-0.911174	-6.48838	0.378064	0.562901	-0.617728	-0.96781	-0.267647	21.6295
706	tr|A0A5F9UK94|A0A5F9UK94_HUMAN AMP deaminase OS=Homo sapiens OX=9606 GN=AMPD2 PE=1 SV=1;sp|Q01433|AMPD2_HUMAN AMP deaminase 2 OS=Homo sapiens OX=9606 GN=AMPD2 PE=1 SV=2;tr|A0A590UJX5|A0A590UJX5_HUMAN AMP deaminase 2 OS=Homo sapiens OX=9606 GN=AMPD2 PE=1 SV	A0A5F9UK94;Q01433;A0A590UJX5;A0A7P0Z4H6;H0Y360;A0A7P0TB79;A0A590UK85;H0YF16	10.343	A0A5F9UK94	AMPD2	AMP deaminase	15.8952	16.6509	16.4118	16.3261	15.88	15.9866	16.4491	16.3572	16.2328	15.9101	15.9679	16.4249	16.2563	15.9226	16.0635	0.558403	0.343228	0.773578	16.1823	5.58108	1.67258	7.52228e-05	0.0015477	0.391902	0.176727	0.607077	16.1823	3.91695	-1.41824	0.0016296	0.0110262	0.210648	-0.00452712	0.425823	16.1823	2.10537	-4.88006	0.0543496	0.154	0.00128833	-0.213887	0.216463	16.1823
1343	tr|D6R9W2|D6R9W2_HUMAN Glutathione S-transferase C-terminal domain-containing protein OS=Homo sapiens OX=9606 GN=GSTCD PE=1 SV=1;sp|Q8NEC7|GSTCD_HUMAN Glutathione S-transferase C-terminal domain-containing protein OS=Homo sapiens OX=9606 GN=GSTCD PE=1 SV=2	D6R9W2;Q8NEC7	4.9413	D6R9W2	GSTCD	Glutathione S-transferase C-terminal domain-containing protein	13.5656	14.3251	14.0997	13.9642	13.3348	13.4475	14.0408	14.1549	13.599	13.1205	13.5709	13.8926	13.8413	13.3347	13.2864	0.558191	0.244117	0.872265	13.7052	3.8222	-1.59818	0.00195862	0.0114601	0.503982	0.189908	0.818056	13.7052	3.45101	-2.31971	0.00404577	0.0199222	0.104642	-0.209432	0.418716	13.7052	0.716534	-6.6488	0.485779	0.654355	-0.28075	-0.594824	0.0333238	13.7052
643	tr|M0R253|M0R253_HUMAN Deoxyhypusine synthase OS=Homo sapiens OX=9606 GN=DHPS PE=1 SV=1;tr|M0QX43|M0QX43_HUMAN Deoxyhypusine synthase OS=Homo sapiens OX=9606 GN=DHPS PE=1 SV=1;tr|A0A3B3IU31|A0A3B3IU31_HUMAN Uncharacterized protein OS=Homo sapiens OX=9606 P	M0R253;M0QX43;A0A3B3IU31;B4E3M2;Q5J8M5;P49366;A0A087WZK0	9.8585	M0R253	DHPS	Deoxyhypusine synthase	17.144	17.8624	17.5698	17.096	17.0812	17.1022	17.5124	17.5735	16.8624	17.0956	17.0699	17.614	17.407	16.9056	17.3851	0.557559	0.332675	0.782442	17.2854	5.33207	1.23118	0.000116577	0.00198963	0.411402	0.186519	0.636286	17.2854	3.93434	-1.38469	0.00157563	0.0108079	-0.150704	-0.375587	0.0741797	17.2854	-1.44122	-5.88982	0.172139	0.336998	0.0818965	-0.142987	0.30678	17.2854
3442	sp|P50395|GDIB_HUMAN Rab GDP dissociation inhibitor beta OS=Homo sapiens OX=9606 GN=GDI2 PE=1 SV=2;tr|Q5SX87|Q5SX87_HUMAN Rab GDP dissociation inhibitor (Fragment) OS=Homo sapiens OX=9606 GN=GDI2 PE=1 SV=1	P50395;Q5SX87	73.391	P50395	GDI2	Rab GDP dissociation inhibitor beta	23.1164	23.8864	23.7112	23.2304	22.4613	23.0491	23.5564	23.6053	22.9718	22.1984	23.1412	23.5341	23.4688	22.8389	23.0141	0.556706	0.192415	0.920996	23.1856	3.28655	-2.63409	0.00558783	0.0222604	0.492847	0.128556	0.857137	23.1856	2.90956	-3.35809	0.0117067	0.0416876	-0.088534	-0.452824	0.275756	23.1856	-0.522667	-6.77289	0.609611	0.753205	-0.544302	-0.908592	-0.180011	23.1856
1269	tr|C9JZG9|C9JZG9_HUMAN Ubiquitin-conjugating enzyme E2 H (Fragment) OS=Homo sapiens OX=9606 GN=UBE2H PE=1 SV=1;tr|C9JZY6|C9JZY6_HUMAN Ubiquitin-conjugating enzyme E2 H (Fragment) OS=Homo sapiens OX=9606 GN=UBE2H PE=1 SV=1;sp|P62256|UBE2H_HUMAN Ubiquitin-co	C9JZG9;C9JZY6;P62256;H7C4M9;C9J8Q9	4.7486	C9JZG9	UBE2H	Ubiquitin-conjugating enzyme E2 H (Fragment)	18.1838	19.0224	18.5973	18.1604	18.0881	18.2394	18.6737	18.6634	18.2361	18.0522	18.2553	18.6518	18.5745	18.0137	18.4039	0.556476	0.32239	0.790561	18.3877	5.11251	0.835083	0.000172747	0.00258754	0.385573	0.151487	0.619659	18.3877	3.54238	-2.14289	0.00338224	0.017886	-0.0894303	-0.323516	0.144655	18.3877	-0.821623	-6.5665	0.425454	0.604563	-0.0447764	-0.278862	0.189309	18.3877
2600	sp|O75884|RBBP9_HUMAN Serine hydrolase RBBP9 OS=Homo sapiens OX=9606 GN=RBBP9 PE=1 SV=2	O75884	7.9448	O75884	RBBP9	Serine hydrolase RBBP9	17.1329	17.98	18.0702	17.2592	16.537	17.1361	17.6099	17.8442	17.0764	16.4996	17.1494	17.4957	17.7738	16.9699	17.1792	0.555781	0.199923	0.911638	17.3142	3.35885	-2.49463	0.00484811	0.0202316	0.756639	0.400781	1.1125	17.3142	4.57273	-0.166631	0.000466455	0.00505948	-0.0375958	-0.393453	0.318262	17.3142	-0.22721	-6.88926	0.823639	0.897055	-0.400828	-0.756685	-0.0449701	17.3142
1395	tr|E5RGX5|E5RGX5_HUMAN Stathmin OS=Homo sapiens OX=9606 GN=STMN2 PE=1 SV=1;sp|Q93045|STMN2_HUMAN Stathmin-2 OS=Homo sapiens OX=9606 GN=STMN2 PE=1 SV=3	E5RGX5;Q93045	5.4173	E5RGX5	STMN2	Stathmin	16.5084	17.2391	17.1214	16.481	16.0899	16.5448	17.0129	17.1121	16.4721	15.8694	16.493	16.958	16.9272	16.263	16.5397	0.554621	0.260604	0.848637	16.6421	4.05684	-1.14576	0.0012437	0.00861521	0.538193	0.244176	0.832209	16.6421	3.93667	-1.3802	0.00156854	0.010798	-0.110046	-0.404063	0.18397	16.6421	-0.804945	-6.58025	0.434692	0.612257	-0.349066	-0.643083	-0.05505	16.6421
563	tr|A0A2R8Y891|A0A2R8Y891_HUMAN ATP-dependent 6-phosphofructokinase OS=Homo sapiens OX=9606 GN=PFKM PE=1 SV=1;sp|P08237|PFKAM_HUMAN ATP-dependent 6-phosphofructokinase, muscle type OS=Homo sapiens OX=9606 GN=PFKM PE=1 SV=2;tr|F8VZI0|F8VZI0_HUMAN ATP-depende	A0A2R8Y891;P08237;F8VZI0	47.704	A0A2R8Y891	PFKM	ATP-dependent 6-phosphofructokinase	21.078	21.7198	21.7179	21.2979	20.3968	20.8907	21.5326	21.5448	20.9281	20.241	21.0406	21.4204	21.5207	21.1101	21.1389	0.554499	0.166274	0.942723	21.1719	3.07171	-3.0465	0.00852088	0.0293369	0.591336	0.203111	0.979561	21.1719	3.27577	-2.65812	0.00570743	0.0253713	0.108952	-0.279273	0.497176	21.1719	0.60355	-6.72558	0.556071	0.71255	-0.410866	-0.79909	-0.0226409	21.1719
722	tr|A0A5F9ZHM4|A0A5F9ZHM4_HUMAN L-lactate dehydrogenase OS=Homo sapiens OX=9606 GN=LDHB PE=1 SV=1;sp|P07195|LDHB_HUMAN L-lactate dehydrogenase B chain OS=Homo sapiens OX=9606 GN=LDHB PE=1 SV=2;tr|A0A3B3IS95|A0A3B3IS95_HUMAN L-lactate dehydrogenase OS=Homo s	A0A5F9ZHM4;P07195;A0A3B3IS95;A8MW50;C9J7H8	40.634	A0A5F9ZHM4	LDHB	L-lactate dehydrogenase	24.3459	25.1839	24.9738	24.5596	23.6437	24.3377	24.8347	24.8746	24.1407	23.3891	24.3986	24.7267	24.7315	24.3139	24.2435	0.554397	0.165527	0.943266	24.4465	3.06605	-3.05731	0.00861595	0.0296002	0.499262	0.110393	0.888132	24.4465	2.76114	-3.63699	0.0156361	0.0509956	-0.0226368	-0.411506	0.366233	24.4465	-0.125191	-6.90833	0.902203	0.948699	-0.601931	-0.990801	-0.213062	24.4465
590	sp|P06744|G6PI_HUMAN Glucose-6-phosphate isomerase OS=Homo sapiens OX=9606 GN=GPI PE=1 SV=4;tr|A0A2U3TZU2|A0A2U3TZU2_HUMAN Glucose-6-phosphate isomerase OS=Homo sapiens OX=9606 GN=GPI PE=1 SV=1;tr|K7EQ48|K7EQ48_HUMAN Glucose-6-phosphate isomerase (Fragment	P06744;A0A2U3TZU2;K7EQ48;A0A2R8Y6C7;A0A0J9YYH3;A0A0J9YX90;A0A0J9YXP8	63.376	P06744	GPI	Glucose-6-phosphate isomerase	23.4336	24.2692	24.1319	23.6211	23.0713	23.4057	23.824	24.1798	23.3692	22.8335	23.4462	23.8533	23.9137	23.2437	23.3228	0.553685	0.250165	0.857205	23.5946	3.92319	-1.40317	0.00161004	0.010108	0.646667	0.343147	0.950186	23.5946	4.58202	-0.149165	0.000458411	0.00500636	-0.0171607	-0.32068	0.286359	23.5946	-0.121593	-6.9088	0.904998	0.950226	-0.352602	-0.656121	-0.049082	23.5946
5824	sp|Q9HA64|KT3K_HUMAN Ketosamine-3-kinase OS=Homo sapiens OX=9606 GN=FN3KRP PE=1 SV=2;tr|I3L139|I3L139_HUMAN Protein-ribulosamine 3-kinase OS=Homo sapiens OX=9606 GN=FN3KRP PE=1 SV=1;tr|I3L2G3|I3L2G3_HUMAN Protein-ribulosamine 3-kinase (Fragment) OS=Homo sa	Q9HA64;I3L139;I3L2G3	11.793	Q9HA64	FN3KRP	Ketosamine-3-kinase	17.9807	18.6967	18.6141	18.2536	17.6879	17.9492	18.4806	18.5149	18.1828	17.639	18.0212	18.4338	18.4742	18.0753	17.9591	0.553356	0.353846	0.752866	18.1975	5.9649	2.33598	3.89371e-05	0.00110607	0.550715	0.351205	0.750225	18.1975	5.93642	2.2853	4.08576e-05	0.00108845	0.186874	-0.0126364	0.386384	18.1975	2.0144	-5.03145	0.0641734	0.173307	-0.221702	-0.421212	-0.0221919	18.1975
3872	sp|Q0VDF9|HSP7E_HUMAN Heat shock 70 kDa protein 14 OS=Homo sapiens OX=9606 GN=HSPA14 PE=1 SV=1	Q0VDF9	22.278	Q0VDF9	HSPA14	Heat shock 70 kDa protein 14	19.2203	19.8996	19.6909	19.3095	19.0701	19.3004	19.802	19.5304	19.1596	18.8413	19.2908	19.77	19.5256	19.0381	19.4201	0.553308	0.299032	0.807584	19.3913	4.67977	0.0368787	0.000381962	0.00422148	0.311781	0.0575051	0.566057	19.3913	2.63698	-3.86725	0.0198905	0.0599634	-0.10144	-0.355716	0.152836	19.3913	-0.857957	-6.53568	0.405776	0.587618	-0.160028	-0.414304	0.0942485	19.3913
564	tr|A0A2R8YGN6|A0A2R8YGN6_HUMAN Spastin (Fragment) OS=Homo sapiens OX=9606 GN=SPAST PE=1 SV=1;tr|A0A2R8YCL5|A0A2R8YCL5_HUMAN Spastin (Fragment) OS=Homo sapiens OX=9606 GN=SPAST PE=1 SV=1;tr|A0A2U3TZR0|A0A2U3TZR0_HUMAN Spastin OS=Homo sapiens OX=9606 GN=SPAS	A0A2R8YGN6;A0A2R8YCL5;A0A2U3TZR0;Q9UBP0;A0A2R8YFC9;A0A2R8Y5N9;A0A2R8Y481;A0A2R8YFW8;A0A2R8Y4I8	6.2146	A0A2R8YGN6	SPAST	Spastin (Fragment)	15.4741	16.1023	16.0345	15.822	15.6104	15.5721	16.1144	16.1792	15.6137	15.3857	15.6691	16.1578	15.8483	15.5541	15.7725	0.553084	0.320576	0.785592	15.794	5.11583	0.841114	0.000171715	0.00257816	0.448916	0.216408	0.681424	15.794	4.15231	-0.965455	0.0010352	0.00839929	0.0915221	-0.140986	0.32403	15.794	0.846547	-6.54549	0.411889	0.592529	0.0178031	-0.214705	0.250311	15.794
428	tr|A0A0U1RR27|A0A0U1RR27_HUMAN C-myc promoter-binding protein OS=Homo sapiens OX=9606 GN=DENND4A PE=1 SV=2;tr|A0A7I2RAZ6|A0A7I2RAZ6_HUMAN C-myc promoter-binding protein OS=Homo sapiens OX=9606 GN=DENND4A PE=1 SV=1;sp|Q7Z401|MYCPP_HUMAN C-myc promoter-bindi	A0A0U1RR27;A0A7I2RAZ6;Q7Z401	4.862	A0A0U1RR27	DENND4A	C-myc promoter-binding protein	12.6048	13.2058	13.0401	12.8568	12.4483	12.6957	13.1052	12.9477	12.9001	12.351	12.5945	13.243	12.8613	12.2079	12.4047	0.553022	0.257412	0.848631	12.7645	4.02334	-1.21019	0.00132666	0.00895365	0.318038	0.0224282	0.613647	12.7645	2.31379	-4.44937	0.0368716	0.0923395	0.0232852	-0.272324	0.318895	12.7645	0.169404	-6.90141	0.867971	0.925683	-0.2303	-0.525909	0.0653101	12.7645
618	tr|A0A7I2V610|A0A7I2V610_HUMAN Insulin-degrading enzyme OS=Homo sapiens OX=9606 GN=IDE PE=1 SV=1;tr|A0A7I2V3E3|A0A7I2V3E3_HUMAN Insulin-degrading enzyme OS=Homo sapiens OX=9606 GN=IDE PE=1 SV=1;tr|A0A7I2V2P6|A0A7I2V2P6_HUMAN Insulin-degrading enzyme OS=Hom	A0A7I2V610;A0A7I2V3E3;A0A7I2V2P6;A0A7I2YQV5;A0A3B3ISG5;P14735;A0A7I2V2S1;A0A7I2V4Q3;A0A7I2V3K9;B3KSB8;A0A7I2YQS6;A0A7I2V612;A0A7I2V373	42.509	A0A7I2V610	IDE	Insulin-degrading enzyme	20.0179	20.6927	20.4682	20.1732	19.7924	19.952	20.543	20.4913	20.1455	19.6197	20.0666	20.4582	20.3735	19.8719	20.0619	0.552429	0.316716	0.788141	20.1819	5.04031	0.703473	0.000196872	0.00282077	0.432138	0.196425	0.66785	20.1819	3.94278	-1.36841	0.00155009	0.010716	0.0513534	-0.184359	0.287066	20.1819	0.468543	-6.80089	0.646814	0.780295	-0.187505	-0.423217	0.0482076	20.1819
5446	sp|Q99543|DNJC2_HUMAN DnaJ homolog subfamily C member 2 OS=Homo sapiens OX=9606 GN=DNAJC2 PE=1 SV=4;tr|H7C3L7|H7C3L7_HUMAN DnaJ homolog subfamily C member 2 (Fragment) OS=Homo sapiens OX=9606 GN=DNAJC2 PE=1 SV=1	Q99543;H7C3L7	9.6931	Q99543	DNAJC2	DnaJ homolog subfamily C member 2	17.0851	17.6822	17.4448	17.1521	16.8131	17.1111	17.6006	17.4177	16.7554	16.6646	17.0444	17.6149	17.2347	16.9939	17.1581	0.552348	0.296913	0.807784	17.1848	4.65044	-0.0179869	0.000403402	0.00436745	0.285533	0.0300977	0.540969	17.1848	2.40402	-4.28975	0.0310861	0.082229	-0.11307	-0.368506	0.142366	17.1848	-0.95198	-6.45041	0.357713	0.544785	-0.201601	-0.457037	0.0538343	17.1848
3183	sp|P30046|DOPD_HUMAN D-dopachrome decarboxylase OS=Homo sapiens OX=9606 GN=DDT PE=1 SV=3;tr|J3KQ18|J3KQ18_HUMAN D-dopachrome decarboxylase OS=Homo sapiens OX=9606 GN=DDT PE=1 SV=1;tr|B5MC82|B5MC82_HUMAN D-dopachrome decarboxylase OS=Homo sapiens OX=9606 GN	P30046;J3KQ18;B5MC82;A6NHG4	31.265	P30046	DDT	D-dopachrome decarboxylase	21.3245	22.1029	22.0149	21.5125	20.8166	21.2319	21.7174	21.8597	21.3422	20.634	21.2889	21.6786	21.8329	21.3343	21.6175	0.551186	0.139171	0.963201	21.4873	2.87706	-3.41609	0.0124742	0.0376534	0.620761	0.208746	1.03278	21.4873	3.24022	-2.72659	0.00612036	0.0264731	0.114613	-0.297401	0.526628	21.4873	0.598254	-6.72888	0.559498	0.714783	-0.259013	-0.671028	0.153002	21.4873
798	tr|A0A6Q8PH20|A0A6Q8PH20_HUMAN Calpain inhibitor OS=Homo sapiens OX=9606 GN=CAST PE=1 SV=1;tr|A0A0C4DGB5|A0A0C4DGB5_HUMAN Calpain inhibitor OS=Homo sapiens OX=9606 GN=CAST PE=1 SV=2;sp|P20810|ICAL_HUMAN Calpastatin OS=Homo sapiens OX=9606 GN=CAST PE=1 SV=4	A0A6Q8PH20;A0A0C4DGB5;P20810;B7Z574;A0A6Q8PFE5;E9PDE4;E7ES10;A0A6Q8PGG5;E9PCH5;A0A6Q8PG72;H0Y7F0;E7EQ12	107.01	A0A6Q8PH20	CAST	Calpain inhibitor	22.2527	23.0127	22.7786	22.4057	21.4911	22.4329	22.6899	22.8586	22.0626	21.3732	22.1495	22.7857	22.5707	22.2042	21.4306	0.551068	0.31092	0.791216	22.2999	4.93503	0.510409	0.000238504	0.00316088	0.457586	0.217438	0.697733	22.2999	4.09785	-1.06994	0.00114931	0.00886251	-0.0542375	-0.294385	0.18591	22.2999	-0.485718	-6.79233	0.634895	0.771643	-0.846766	-1.08691	-0.606619	22.2999
930	sp|A0AVT1|UBA6_HUMAN Ubiquitin-like modifier-activating enzyme 6 OS=Homo sapiens OX=9606 GN=UBA6 PE=1 SV=1;tr|H0Y8S8|H0Y8S8_HUMAN Ubiquitin-like modifier-activating enzyme 6 (Fragment) OS=Homo sapiens OX=9606 GN=UBA6 PE=1 SV=1	A0AVT1;H0Y8S8	42.609	A0AVT1	UBA6	Ubiquitin-like modifier-activating enzyme 6	20.2128	21.0026	20.7888	20.3498	19.7749	20.2227	20.6896	20.7384	20.1673	19.5771	20.2816	20.6778	20.5772	19.8917	20.0069	0.550913	0.272612	0.829215	20.3306	4.25726	-0.761744	0.00084694	0.00678191	0.462389	0.184087	0.74069	20.3306	3.57318	-2.08325	0.00318425	0.017247	-0.102786	-0.381088	0.175515	20.3306	-0.794297	-6.58889	0.440656	0.616532	-0.452766	-0.731068	-0.174465	20.3306
2185	tr|K7ES67|K7ES67_HUMAN HAUS augmin-like complex subunit 1 (Fragment) OS=Homo sapiens OX=9606 GN=HAUS1 PE=1 SV=8;sp|Q96CS2|HAUS1_HUMAN HAUS augmin-like complex subunit 1 OS=Homo sapiens OX=9606 GN=HAUS1 PE=1 SV=1;tr|K7EK72|K7EK72_HUMAN HAUS augmin-like comp	K7ES67;Q96CS2;K7EK72;K7EJA9;K7EM54;K7EKH4;K7EQT8	4.7832	K7ES67	HAUS1	HAUS augmin-like complex subunit 1 (Fragment)	13.4755	14.1438	13.9979	13.6303	13.5355	13.6209	14.0339	14.013	13.6617	13.5041	13.5201	14.0902	13.8256	13.2801	13.7405	0.550475	0.332696	0.768254	13.7382	5.43607	1.41655	9.69849e-05	0.00178505	0.406658	0.18888	0.624437	13.7382	4.01584	-1.22762	0.00134597	0.00979407	-0.0148332	-0.232612	0.202946	13.7382	-0.146481	-6.90526	0.88569	0.937685	0.0545426	-0.163236	0.272322	13.7382
2966	sp|P14174|MIF_HUMAN Macrophage migration inhibitory factor OS=Homo sapiens OX=9606 GN=MIF PE=1 SV=4	P14174	31.959	P14174	MIF	Macrophage migration inhibitory factor	20.2693	20.8335	21.1706	20.4013	19.974	20.548	20.9034	20.8569	20.2459	19.544	20.2506	20.9813	20.6215	20.1158	20.2195	0.550118	0.200096	0.90014	20.4624	3.38005	-2.45368	0.00465041	0.01971	0.527072	0.17705	0.877095	20.4624	3.23845	-2.73	0.00614166	0.0265471	-0.101595	-0.451617	0.248428	20.4624	-0.624221	-6.71246	0.542807	0.70234	-0.443459	-0.793481	-0.0934365	20.4624
4097	sp|Q14847|LASP1_HUMAN LIM and SH3 domain protein 1 OS=Homo sapiens OX=9606 GN=LASP1 PE=1 SV=2;tr|C9J9W2|C9J9W2_HUMAN LIM and SH3 domain protein 1 (Fragment) OS=Homo sapiens OX=9606 GN=LASP1 PE=1 SV=1	Q14847;C9J9W2	44.495	Q14847	LASP1	LIM and SH3 domain protein 1	22.3426	23.0542	22.5957	22.0124	21.6614	22.1877	22.6661	22.5058	21.5845	21.3251	22.2561	22.715	22.3137	21.8115	22.0599	0.54965	0.195662	0.903638	22.2061	3.33934	-2.53228	0.00503743	0.0206627	0.209593	-0.144395	0.563581	22.2061	1.27336	-6.02788	0.224215	0.341678	-0.459307	-0.813295	-0.105319	22.2061	-2.79047	-3.65186	0.0147687	0.0616065	-0.579961	-0.93395	-0.225973	22.2061
598	tr|A0A3B3IRI2|A0A3B3IRI2_HUMAN CTP synthase OS=Homo sapiens OX=9606 GN=CTPS1 PE=1 SV=1;sp|P17812|PYRG1_HUMAN CTP synthase 1 OS=Homo sapiens OX=9606 GN=CTPS1 PE=1 SV=2;tr|B4E1E0|B4E1E0_HUMAN CTP synthase OS=Homo sapiens OX=9606 GN=CTPS1 PE=1 SV=1;tr|A0A3B3I	A0A3B3IRI2;P17812;B4E1E0;A0A3B3IRQ8;A0A3B3ITF6	43.447	A0A3B3IRI2	CTPS1	CTP synthase	20.3489	21.0529	20.8527	20.2369	19.9033	20.2885	20.8419	20.6977	20.1483	19.6694	20.3911	20.7801	20.5351	19.8479	19.9823	0.548812	0.296662	0.800962	20.3718	4.68088	0.0389542	0.000381174	0.00422148	0.352361	0.100211	0.604512	20.3718	3.00533	-3.1764	0.00970545	0.0363498	-0.265123	-0.517273	-0.0129728	20.3718	-2.26126	-4.61304	0.0406943	0.125575	-0.491155	-0.743305	-0.239004	20.3718
5636	sp|Q9BYM8|HOIL1_HUMAN RanBP-type and C3HC4-type zinc finger-containing protein 1 OS=Homo sapiens OX=9606 GN=RBCK1 PE=1 SV=2;tr|H0Y4S7|H0Y4S7_HUMAN RanBP-type and C3HC4-type zinc finger-containing protein 1 (Fragment) OS=Homo sapiens OX=9606 GN=RBCK1 PE=1 S	Q9BYM8;H0Y4S7;B4DML5;G3XAG9	10.764	Q9BYM8	RBCK1	RanBP-type and C3HC4-type zinc finger-containing protein 1	14.9128	15.4294	15.1751	15.0334	14.0562	14.6118	15.286	15.0305	14.5135	13.879	14.681	15.1365	14.8536	14.3594	14.3003	0.548781	0.201841	0.895721	14.7506	3.4018	-2.41166	0.00445603	0.0192162	0.284522	-0.0624179	0.631461	14.7506	1.7637	-5.35542	0.100211	0.190518	-0.0997646	-0.446704	0.247175	14.7506	-0.618423	-6.71618	0.54651	0.70584	-0.656674	-1.00361	-0.309734	14.7506
4416	sp|Q5T6V5|QSPP_HUMAN Queuosine salvage protein OS=Homo sapiens OX=9606 GN=C9orf64 PE=1 SV=1	Q5T6V5	7.045	Q5T6V5	C9orf64	Queuosine salvage protein	18.3781	19.0768	18.9733	18.5266	18.1168	18.277	18.8352	18.8406	18.3575	18.0296	18.3459	18.7342	18.697	18.2544	18.217	0.548394	0.330968	0.76582	18.5107	5.42431	1.39566	9.90164e-05	0.0018005	0.503315	0.285889	0.720741	18.5107	4.97842	0.587515	0.000220333	0.00316882	0.0458224	-0.171604	0.263248	18.5107	0.453241	-6.80828	0.657519	0.788071	-0.212515	-0.429941	0.00491075	18.5107
5574	sp|Q9BV86|NTM1A_HUMAN N-terminal Xaa-Pro-Lys N-methyltransferase 1 OS=Homo sapiens OX=9606 GN=NTMT1 PE=1 SV=3	Q9BV86	14.635	Q9BV86	NTMT1	N-terminal Xaa-Pro-Lys N-methyltransferase 1	16.0404	16.6257	16.6442	16.0684	15.8148	16.1822	16.6916	16.5273	16.1109	15.5601	15.9517	16.5022	16.3939	15.8712	16.0439	0.548391	0.298964	0.797818	16.2019	4.72836	0.127588	0.000348993	0.00401027	0.463672	0.214245	0.713098	16.2019	3.99789	-1.2622	0.00139345	0.00999109	-0.0412673	-0.290694	0.208159	16.2019	-0.355816	-6.84967	0.727434	0.833998	-0.25187	-0.501296	-0.00244314	16.2019
2908	sp|P10599|THIO_HUMAN Thioredoxin OS=Homo sapiens OX=9606 GN=TXN PE=1 SV=3	P10599	16.91	P10599	TXN	Thioredoxin	23.8646	24.6515	24.9336	24.6008	23.7704	24.0122	24.4496	24.8947	24.4459	23.6377	23.977	24.3974	24.7028	24.2738	24.1642	0.548229	0.274882	0.821575	24.3184	4.31332	-0.654865	0.000761178	0.00631901	0.892426	0.61908	1.16577	24.3184	7.02137	4.05082	7.05938e-06	0.000362476	0.488893	0.215546	0.762239	24.3184	3.84648	-1.61817	0.00186835	0.0138394	-0.0938383	-0.367185	0.179508	24.3184
2833	sp|P07384|CAN1_HUMAN Calpain-1 catalytic subunit OS=Homo sapiens OX=9606 GN=CAPN1 PE=1 SV=1	P07384	57.831	P07384	CAPN1	Calpain-1 catalytic subunit	21.565	22.3173	22.3171	21.8619	21.3542	21.6706	22.1644	22.2256	21.8235	21.1211	21.6366	22.0319	21.9573	21.656	21.3644	0.547174	0.320758	0.773589	21.8045	5.19734	0.988865	0.000148282	0.00233077	0.542617	0.316201	0.769033	21.8045	5.15406	0.907962	0.000160278	0.00260329	0.156439	-0.0699771	0.382855	21.8045	1.48594	-5.82979	0.160095	0.321198	-0.344177	-0.570593	-0.117762	21.8045
5704	sp|Q9H1E3|NUCKS_HUMAN Nuclear ubiquitous casein and cyclin-dependent kinase substrate 1 OS=Homo sapiens OX=9606 GN=NUCKS1 PE=1 SV=1	Q9H1E3	44.726	Q9H1E3	NUCKS1	Nuclear ubiquitous casein and cyclin-dependent kinase substrate 1	22.0585	22.9415	22.9197	22.4985	21.3974	22.261	22.5603	22.8791	22.2188	21.6765	22.0542	22.5134	22.8511	22.4458	22.1244	0.54716	0.210038	0.884282	22.36	3.49052	-2.24008	0.00374407	0.0173086	0.75872	0.421598	1.09584	22.36	4.84014	0.332555	0.000283866	0.00366608	0.263128	-0.0739936	0.60025	22.36	1.67859	-5.55669	0.11604	0.260567	-0.391791	-0.728913	-0.0546695	22.36
4619	sp|Q70CQ2|UBP34_HUMAN Ubiquitin carboxyl-terminal hydrolase 34 OS=Homo sapiens OX=9606 GN=USP34 PE=1 SV=2;tr|A0A0C4DG73|A0A0C4DG73_HUMAN Ubiquitin carboxyl-terminal hydrolase (Fragment) OS=Homo sapiens OX=9606 GN=USP34 PE=1 SV=1	Q70CQ2;A0A0C4DG73	19.817	Q70CQ2	USP34	Ubiquitin carboxyl-terminal hydrolase 34	19.784	20.4086	20.2535	19.3483	17.9521	19.5738	20.2331	20.1757	18.7671	17.669	19.6797	20.0316	20.0837	18.253	17.4857	0.545262	0.102109	0.988415	19.3133	2.64615	-3.84693	0.0195412	0.0519195	0.491829	0.0486759	0.934981	19.3133	2.38684	-4.32033	0.0321165	0.0840467	-0.88968	-1.33283	-0.446527	19.3133	-4.31761	-0.71024	0.000754995	0.00721666	-1.97686	-2.42001	-1.53371	19.3133
1189	tr|C9J2P0|C9J2P0_HUMAN Ubiquitin-conjugating enzyme E2 E1 (Fragment) OS=Homo sapiens OX=9606 GN=UBE2E1 PE=1 SV=1;sp|P51965|UB2E1_HUMAN Ubiquitin-conjugating enzyme E2 E1 OS=Homo sapiens OX=9606 GN=UBE2E1 PE=1 SV=1	C9J2P0;P51965	8.7639	C9J2P0	UBE2E1	Ubiquitin-conjugating enzyme E2 E1 (Fragment)	15.1371	15.8232	15.5344	15.0348	15.0335	15.1011	15.4754	15.5121	14.8003	14.8828	15.1099	15.6853	15.4338	14.8038	15.1383	0.545249	0.340755	0.749743	15.2337	5.73425	1.93982	5.76973e-05	0.00135037	0.37737	0.172875	0.581864	15.2337	3.96871	-1.31843	0.00147428	0.0103835	-0.23641	-0.440905	-0.0319162	15.2337	-2.48627	-4.21324	0.0265756	0.0923977	-0.097834	-0.302328	0.10666	15.2337
296	tr|A0A0B4J1W3|A0A0B4J1W3_HUMAN N-alpha-acetyltransferase 15, NatA auxiliary subunit OS=Homo sapiens OX=9606 GN=NAA15 PE=1 SV=1;sp|Q9BXJ9|NAA15_HUMAN N-alpha-acetyltransferase 15, NatA auxiliary subunit OS=Homo sapiens OX=9606 GN=NAA15 PE=1 SV=1	A0A0B4J1W3;Q9BXJ9	47.998	A0A0B4J1W3	NAA15	N-alpha-acetyltransferase 15, NatA auxiliary subunit	20.3435	20.9952	20.7083	20.3085	19.8973	20.2601	20.8506	20.6762	20.2108	19.7009	20.3795	20.7729	20.5862	20.1652	20.4043	0.545178	0.258401	0.831954	20.4173	4.08843	-1.08504	0.00117032	0.00825053	0.329175	0.0423986	0.615952	20.4173	2.46858	-4.17409	0.0274897	0.0750543	-0.0995424	-0.386319	0.187234	20.4173	-0.746495	-6.62639	0.468071	0.640391	-0.326917	-0.613694	-0.0401404	20.4173
3379	sp|P48147|PPCE_HUMAN Prolyl endopeptidase OS=Homo sapiens OX=9606 GN=PREP PE=1 SV=2;tr|A0A499FJL1|A0A499FJL1_HUMAN Prolyl endopeptidase OS=Homo sapiens OX=9606 GN=PREP PE=1 SV=1	P48147;A0A499FJL1	85.902	P48147	PREP	Prolyl endopeptidase	21.0928	21.806	21.5689	21.075	20.1486	21.0776	21.581	21.4168	20.9543	19.8899	21.1224	21.5405	21.3763	20.7458	20.6827	0.544895	0.210733	0.879056	21.0719	3.50687	-2.20845	0.00362599	0.0169728	0.356381	0.0222195	0.690542	21.0719	2.29362	-4.48469	0.0382975	0.0947742	-0.172581	-0.506742	0.161581	21.0719	-1.1107	-6.28918	0.285938	0.474278	-0.857224	-1.19139	-0.523063	21.0719
3508	sp|P53004|BIEA_HUMAN Biliverdin reductase A OS=Homo sapiens OX=9606 GN=BLVRA PE=1 SV=2	P53004	14.228	P53004	BLVRA	Biliverdin reductase A	18.4899	19.204	19.2078	18.9151	18.1769	18.3675	18.8523	19.0046	18.7723	17.9713	18.3451	18.78	18.9752	18.6348	18.6424	0.544609	0.218036	0.871183	18.6893	3.58647	-2.05435	0.00310247	0.015358	0.661741	0.335168	0.988315	18.6893	4.35783	-0.573071	0.000699471	0.00647316	0.373272	0.0466981	0.699845	18.6893	2.45814	-4.26403	0.0280426	0.0964969	-0.137305	-0.463878	0.189269	18.6893
117	tr|A0A087WY85|A0A087WY85_HUMAN Ubiquitin-conjugating enzyme E2 D3 OS=Homo sapiens OX=9606 GN=UBE2D3 PE=1 SV=1;sp|P61077|UB2D3_HUMAN Ubiquitin-conjugating enzyme E2 D3 OS=Homo sapiens OX=9606 GN=UBE2D3 PE=1 SV=1;tr|D6R9F6|D6R9F6_HUMAN Ubiquitin-conjugating	A0A087WY85;P61077;D6R9F6;D6R933;D6RGD0;D6R980;D6RAW0;D6RIZ3;D6RA11;D6RFM0;D6RAH7;H9KV45;A0A0A0MQU3;P62837	4.9357	A0A087WY85	UBE2D3	Ubiquitin-conjugating enzyme E2 D3	20.1958	20.9163	20.8252	20.1097	19.8292	20.32	20.8253	20.7149	20.2157	19.4847	20.2904	20.6984	20.6621	19.9637	20.2151	0.544595	0.246178	0.843011	20.3511	3.92477	-1.40011	0.00160512	0.010097	0.465308	0.166892	0.763724	20.3511	3.35337	-2.50844	0.00490057	0.0228084	-0.172385	-0.470801	0.126032	20.3511	-1.24234	-6.13992	0.235098	0.415616	-0.42576	-0.724177	-0.127344	20.3511
2579	sp|O75582|KS6A5_HUMAN Ribosomal protein S6 kinase alpha-5 OS=Homo sapiens OX=9606 GN=RPS6KA5 PE=1 SV=1;tr|A0A3B3ISL8|A0A3B3ISL8_HUMAN Ribosomal protein S6 kinase alpha-5 OS=Homo sapiens OX=9606 GN=RPS6KA5 PE=1 SV=1;tr|G3V2D1|G3V2D1_HUMAN Ribosomal protein	O75582;A0A3B3ISL8;G3V2D1	8.2291	O75582	RPS6KA5	Ribosomal protein S6 kinase alpha-5	17.8254	18.3968	18.2888	17.7958	17.2517	17.7348	18.3223	18.3016	17.7404	16.9997	17.7248	18.1996	18.2047	17.7832	17.5974	0.544548	0.301304	0.787791	17.8778	4.81457	0.287876	0.000297559	0.00364043	0.50336	0.260117	0.746604	17.8778	4.45041	-0.397436	0.000587068	0.00587292	0.0114831	-0.23176	0.254727	17.8778	0.101527	-6.91118	0.920613	0.958558	-0.478748	-0.721992	-0.235505	17.8778
3696	sp|P63151|2ABA_HUMAN Serine/threonine-protein phosphatase 2A 55 kDa regulatory subunit B alpha isoform OS=Homo sapiens OX=9606 GN=PPP2R2A PE=1 SV=1;tr|A0A590UJY3|A0A590UJY3_HUMAN Serine/threonine-protein phosphatase 2A 55 kDa regulatory subunit B OS=Homo s	P63151;A0A590UJY3	29.005	P63151	PPP2R2A	Serine/threonine-protein phosphatase 2A 55 kDa regulatory subunit B alpha isoform	20.7888	21.488	21.2011	20.8607	19.9824	20.6841	21.2128	21.2192	20.6879	19.7917	20.794	21.1991	21.0286	20.5021	20.5846	0.544333	0.195299	0.893366	20.8017	3.35398	-2.50403	0.0048947	0.0203446	0.394018	0.0449841	0.743052	20.8017	2.42779	-4.2473	0.0297124	0.0794869	-0.0720755	-0.421109	0.276958	20.8017	-0.444103	-6.81257	0.663949	0.793002	-0.636089	-0.985123	-0.287056	20.8017
4362	tr|Q5QPM7|Q5QPM7_HUMAN Proteasome inhibitor PI31 subunit OS=Homo sapiens OX=9606 GN=PSMF1 PE=1 SV=2;sp|Q92530|PSMF1_HUMAN Proteasome inhibitor PI31 subunit OS=Homo sapiens OX=9606 GN=PSMF1 PE=1 SV=2;tr|Q5QPM9|Q5QPM9_HUMAN Proteasome inhibitor PI31 subunit	Q5QPM7;Q92530;Q5QPM9	28.226	Q5QPM7	PSMF1	Proteasome inhibitor PI31 subunit	18.4103	19.0269	18.6792	18.2684	17.9192	18.3054	18.828	18.7342	17.8686	17.7169	18.2619	18.7556	18.4022	17.9332	18.0558	0.544314	0.278222	0.810406	18.3444	4.39927	-0.491484	0.000646642	0.00578071	0.279315	0.0132232	0.545407	18.3444	2.25749	-4.54763	0.0409829	0.0995568	-0.302492	-0.568584	-0.0364006	18.3444	-2.44481	-4.28802	0.0287645	0.0979178	-0.428562	-0.694654	-0.16247	18.3444
2792	sp|P04406|G3P_HUMAN Glyceraldehyde-3-phosphate dehydrogenase OS=Homo sapiens OX=9606 GN=GAPDH PE=1 SV=3;tr|E7EUT5|E7EUT5_HUMAN Glyceraldehyde-3-phosphate dehydrogenase OS=Homo sapiens OX=9606 GN=GAPDH PE=1 SV=1	P04406;E7EUT5	141.08	P04406	GAPDH	Glyceraldehyde-3-phosphate dehydrogenase	26.9215	27.6342	27.6297	27.17	26.1733	27.2162	27.5917	27.9859	26.9684	25.9564	26.915	27.4563	27.5964	26.9205	26.6169	0.543193	0.213635	0.87275	27.1168	3.54475	-2.13512	0.00336655	0.0162392	0.71977	0.390212	1.04933	27.1168	4.69705	0.0664172	0.000369881	0.00440193	0.00206928	-0.327488	0.331627	27.1168	0.0135036	-6.91656	0.989422	0.995049	-0.768687	-1.09824	-0.43913	27.1168
5838	sp|Q9HB71|CYBP_HUMAN Calcyclin-binding protein OS=Homo sapiens OX=9606 GN=CACYBP PE=1 SV=2	Q9HB71	32.843	Q9HB71	CACYBP	Calcyclin-binding protein	22.0528	22.7584	22.5074	22.088	21.6009	22.035	22.5453	22.457	21.8529	21.4953	22.0788	22.4922	22.2639	21.8951	22.2623	0.543103	0.206981	0.879225	22.159	3.47494	-2.27021	0.00386021	0.0177174	0.353945	0.0178233	0.690067	22.159	2.26466	-4.53518	0.0404366	0.0985303	-0.110197	-0.446319	0.225925	22.159	-0.705073	-6.65715	0.492658	0.660221	-0.269377	-0.605499	0.0667454	22.159
1003	tr|A8MUA9|A8MUA9_HUMAN SMT3 suppressor of mif two 3 homolog 3 (Yeast), isoform CRA_d OS=Homo sapiens OX=9606 GN=SUMO3 PE=1 SV=1;tr|A8MU27|A8MU27_HUMAN Small ubiquitin-related modifier 3 OS=Homo sapiens OX=9606 GN=SUMO3 PE=1 SV=1;sp|Q6EEV6|SUMO4_HUMAN Small	A8MUA9;A8MU27;Q6EEV6;P61956;P55854	4.2554	A8MUA9	SUMO3	SMT3 suppressor of mif two 3 homolog 3 (Yeast), isoform CRA_d	22.2642	22.7973	22.6639	22.2375	22.0928	22.1556	22.7636	22.6662	21.9784	21.9474	22.1936	22.6818	22.6033	22.1752	21.8573	0.543094	0.372613	0.713576	22.3386	6.8511	3.78667	9.2011e-06	0.000502778	0.439983	0.269502	0.610465	22.3386	5.55036	1.6162	7.93637e-05	0.00169692	-0.0740917	-0.244573	0.09639	22.3386	-0.934662	-6.46671	0.366254	0.552113	-0.238606	-0.409088	-0.0681247	22.3386
2679	sp|O95336|6PGL_HUMAN 6-phosphogluconolactonase OS=Homo sapiens OX=9606 GN=PGLS PE=1 SV=2;tr|M0R261|M0R261_HUMAN 6-phosphogluconolactonase (Fragment) OS=Homo sapiens OX=9606 GN=PGLS PE=1 SV=1	O95336;M0R261	41.847	O95336	PGLS	6-phosphogluconolactonase	20.7349	21.5215	21.573	21.0795	20.2006	20.7048	21.1429	21.4828	20.8794	20.0703	20.7068	21.1102	21.3093	20.7429	20.7463	0.542697	0.204934	0.880461	20.9337	3.45547	-2.30788	0.00401048	0.0180577	0.739545	0.401782	1.07731	20.9337	4.70885	0.0884477	0.000361862	0.00436254	0.185121	-0.152643	0.522884	20.9337	1.1787	-6.21377	0.258718	0.444414	-0.376423	-0.714186	-0.0386593	20.9337
5532	sp|Q9BSL1|UBAC1_HUMAN Ubiquitin-associated domain-containing protein 1 OS=Homo sapiens OX=9606 GN=UBAC1 PE=1 SV=1	Q9BSL1	3.7089	Q9BSL1	UBAC1	Ubiquitin-associated domain-containing protein 1	15.7057	16.2036	16.6745	16.0342	15.7793	16.1425	16.6452	16.3305	16.1542	15.5953	16.0947	16.7212	16.6277	16.0599	16.2623	0.542326	0.163336	0.921316	16.202	3.07748	-3.03548	0.00842495	0.0291327	0.563246	0.184256	0.942236	16.202	3.1962	-2.81126	0.00667323	0.0280822	0.101763	-0.277227	0.480753	16.202	0.577464	-6.74155	0.573058	0.724834	-0.102037	-0.481027	0.276953	16.202
5186	sp|Q969U7|PSMG2_HUMAN Proteasome assembly chaperone 2 OS=Homo sapiens OX=9606 GN=PSMG2 PE=1 SV=1;tr|K7ENR6|K7ENR6_HUMAN Proteasome assembly chaperone 2 OS=Homo sapiens OX=9606 GN=PSMG2 PE=1 SV=1;tr|V9GZ55|V9GZ55_HUMAN Proteasome assembly chaperone 2 (Fragm	Q969U7;K7ENR6;V9GZ55	17.908	Q969U7	PSMG2	Proteasome assembly chaperone 2	18.194	18.9057	18.713	18.1733	18.001	18.3387	18.7293	18.5978	18.074	17.7453	18.2302	18.7534	18.479	17.9971	18.3742	0.541873	0.27238	0.811365	18.3537	4.32428	-0.633994	0.000745479	0.00626084	0.342324	0.0728315	0.611816	18.3537	2.73183	-3.69162	0.0165523	0.0526979	-0.172793	-0.442285	0.0966996	18.3537	-1.37893	-5.97117	0.190163	0.361151	-0.214078	-0.483571	0.0554142	18.3537
3977	sp|Q13526|PIN1_HUMAN Peptidyl-prolyl cis-trans isomerase NIMA-interacting 1 OS=Homo sapiens OX=9606 GN=PIN1 PE=1 SV=1;tr|K7EN45|K7EN45_HUMAN Peptidyl-prolyl cis-trans isomerase (Fragment) OS=Homo sapiens OX=9606 GN=PIN1 PE=1 SV=1;tr|K7EMU7|K7EMU7_HUMAN Pep	Q13526;K7EN45;K7EMU7	12.383	Q13526	PIN1	Peptidyl-prolyl cis-trans isomerase NIMA-interacting 1	17.0977	17.8548	17.828	17.4591	17.0024	17.5636	17.8959	17.8627	17.4567	16.8072	17.2453	17.7808	17.5446	17.2824	17.0745	0.541621	0.286308	0.796934	17.4504	4.56232	-0.183407	0.000475643	0.00479864	0.442892	0.187579	0.698205	17.4504	3.73068	-1.7783	0.00234068	0.0140199	0.0972229	-0.15809	0.352536	17.4504	0.818953	-6.56872	0.426925	0.605841	-0.340807	-0.59612	-0.0854946	17.4504
3312	sp|P41227|NAA10_HUMAN N-alpha-acetyltransferase 10 OS=Homo sapiens OX=9606 GN=NAA10 PE=1 SV=1	P41227	23.281	P41227	NAA10	N-alpha-acetyltransferase 10	20.3032	20.9415	20.589	20.2047	19.9298	20.1558	20.725	20.6192	20.0986	19.8498	20.2482	20.6647	20.4964	20.1981	20.3837	0.541327	0.288386	0.794268	20.3605	4.6026	-0.107685	0.000441089	0.00460323	0.332458	0.0795173	0.585399	20.3605	2.82671	-3.51421	0.013762	0.0465337	-0.0685779	-0.321519	0.184363	20.3605	-0.583079	-6.73817	0.569378	0.72189	-0.181313	-0.434254	0.0716284	20.3605
3459	sp|P50995|ANX11_HUMAN Annexin A11 OS=Homo sapiens OX=9606 GN=ANXA11 PE=1 SV=1	P50995	97.36	P50995	ANXA11	Annexin A11	21.954	22.7151	22.4179	21.8014	21.3446	21.8674	22.3628	22.3674	21.6952	21.1502	21.9711	22.3377	22.2474	21.7495	22.1794	0.541029	0.125501	0.956556	22.0107	2.80016	-3.56063	0.0144926	0.0417655	0.41336	-0.00216791	0.828887	22.0107	2.1394	-4.75015	0.0510473	0.116619	-0.18214	-0.597668	0.233387	22.0107	-0.94269	-6.45919	0.362277	0.548931	-0.372796	-0.788323	0.0427319	22.0107
3314	sp|P41240|CSK_HUMAN Tyrosine-protein kinase CSK OS=Homo sapiens OX=9606 GN=CSK PE=1 SV=1	P41240	31.37	P41240	CSK	Tyrosine-protein kinase CSK	19.2962	20.0309	19.9274	19.4546	19.3052	19.183	19.7818	19.8861	19.5219	19.0756	19.3564	19.6449	19.7313	19.1522	19.451	0.540655	0.275417	0.805892	19.5199	4.38377	-0.520904	0.000665905	0.00586646	0.569747	0.30451	0.834985	19.5199	4.61966	-0.0784666	0.000427252	0.00478087	0.0976968	-0.167541	0.362934	19.5199	0.792151	-6.59062	0.441865	0.617819	-0.00130239	-0.26654	0.263935	19.5199
3143	sp|P26639|SYTC_HUMAN Threonine--tRNA ligase 1, cytoplasmic OS=Homo sapiens OX=9606 GN=TARS1 PE=1 SV=3	P26639	91.279	P26639	TARS1	Threonine--tRNA ligase 1, cytoplasmic	23.4276	24.125	23.8664	23.3906	23.0483	23.3655	23.8942	23.8536	23.2678	22.7843	23.3872	23.7823	23.5759	23.0505	23.3261	0.540392	0.250498	0.830286	23.4764	4.00896	-1.23786	0.00136397	0.00910171	0.371892	0.0819979	0.661787	23.4764	2.75893	-3.64111	0.0157034	0.051038	-0.157138	-0.447032	0.132757	23.4764	-1.16575	-6.22842	0.263745	0.450014	-0.340579	-0.630474	-0.0506848	23.4764
3232	sp|P33981|TTK_HUMAN Dual specificity protein kinase TTK OS=Homo sapiens OX=9606 GN=TTK PE=1 SV=2	P33981	14.542	P33981	TTK	Dual specificity protein kinase TTK	17.7398	18.3428	18.1207	17.6612	17.8803	17.7152	18.2364	18.0479	17.7436	17.7124	17.776	18.2665	18.0854	17.5412	17.8645	0.538252	0.390579	0.685924	17.9156	7.83878	5.27139	2.08475e-06	0.000216456	0.341019	0.193347	0.488692	17.9156	4.96641	0.565452	0.000225215	0.00319365	-0.0949532	-0.242626	0.0527194	17.9156	-1.38284	-5.96614	0.188987	0.359239	0.0754326	-0.0722399	0.223105	17.9156
4159	sp|Q15417|CNN3_HUMAN Calponin-3 OS=Homo sapiens OX=9606 GN=CNN3 PE=1 SV=1;tr|E9PDU6|E9PDU6_HUMAN Calponin (Fragment) OS=Homo sapiens OX=9606 GN=CNN3 PE=1 SV=1	Q15417;E9PDU6	52.716	Q15417	CNN3	Calponin-3	21.2996	21.9109	21.1505	20.4111	21.9739	21.4654	21.9429	20.9734	20.648	21.4611	21.2852	21.8075	20.772	20.0588	20.8972	0.537062	0.0840912	0.990032	21.2038	2.54987	-4.0234	0.0235257	0.0595959	-0.384741	-0.837711	0.06823	21.2038	-1.82667	-5.25866	0.0897629	0.17483	-0.977426	-1.4304	-0.524455	21.2038	-4.64063	-0.097396	0.000410853	0.00469567	0.0940189	-0.358952	0.546989	21.2038
517	tr|A0A2R8Y430|A0A2R8Y430_HUMAN Glutathione synthetase OS=Homo sapiens OX=9606 GN=GSS PE=1 SV=1;sp|P48637|GSHB_HUMAN Glutathione synthetase OS=Homo sapiens OX=9606 GN=GSS PE=1 SV=1;tr|A0A2R8Y5T7|A0A2R8Y5T7_HUMAN Glutathione synthase (Fragment) OS=Homo sapie	A0A2R8Y430;P48637;A0A2R8Y5T7	51.241	A0A2R8Y430	GSS	Glutathione synthetase	20.7838	21.5743	21.4308	21.02	20.0627	20.8251	21.2535	21.3798	20.7382	19.9513	20.8563	21.2486	21.2312	20.6311	20.7077	0.537055	0.182179	0.891931	20.913	3.25466	-2.69553	0.00594917	0.0231903	0.525536	0.170661	0.880412	20.913	3.18485	-2.83305	0.00682357	0.0285264	-0.0252974	-0.380173	0.329578	20.913	-0.153307	-6.90417	0.880406	0.934167	-0.581164	-0.93604	-0.226288	20.913
2932	sp|P11766|ADHX_HUMAN Alcohol dehydrogenase class-3 OS=Homo sapiens OX=9606 GN=ADH5 PE=1 SV=4	P11766	29.8	P11766	ADH5	Alcohol dehydrogenase class-3	21.1766	21.9469	21.9506	21.5096	20.9055	21.2657	21.76	21.8323	21.4774	20.5576	21.2595	21.6044	21.7796	21.2791	20.9174	0.536547	0.30258	0.770515	21.4148	4.93191	0.504672	0.000239867	0.00316148	0.620215	0.386248	0.854183	21.4148	5.70098	1.87975	6.11022e-05	0.00141537	0.188104	-0.0458636	0.422072	21.4148	1.72904	-5.48152	0.106411	0.244641	-0.440441	-0.674409	-0.206473	21.4148
2769	sp|P02452|CO1A1_HUMAN Collagen alpha-1(I) chain OS=Homo sapiens OX=9606 GN=COL1A1 PE=1 SV=5	P02452	6.3706	P02452	COL1A1	Collagen alpha-1(I) chain	13.7882	13.4515	17.0333	14.2642	17.11	14.8186	17.0695	18.8726	13.8825	14.6019	13.6074	13.3022	13.4009	13.6196	13.6622	0.536333	-2.43043	3.50309	14.8323	0.395363	-6.75326	0.699743	0.766776	2.3642	-0.602563	5.33096	14.8323	1.74279	-5.39361	0.107766	0.201453	-0.149285	-3.11605	2.81747	14.8323	-0.110047	-6.91014	0.914251	0.955574	1.05332	-1.91344	4.02008	14.8323
5224	sp|Q96C19|EFHD2_HUMAN EF-hand domain-containing protein D2 OS=Homo sapiens OX=9606 GN=EFHD2 PE=1 SV=1;tr|H0Y4Y4|H0Y4Y4_HUMAN EF-hand domain-containing protein D2 (Fragment) OS=Homo sapiens OX=9606 GN=EFHD2 PE=1 SV=1	Q96C19;H0Y4Y4	40.115	Q96C19	EFHD2	EF-hand domain-containing protein D2	21.1582	21.8847	21.4135	21.0717	20.8029	21.1345	21.5368	21.313	21.1185	20.8265	21.1749	21.6539	21.2411	20.9398	21.287	0.535969	0.278549	0.793389	21.2371	4.47775	-0.34288	0.000557572	0.00526632	0.166688	-0.0907322	0.424108	21.2371	1.39259	-5.87891	0.186081	0.299565	-0.112489	-0.369909	0.144931	21.2371	-0.93979	-6.46191	0.36371	0.549711	-0.183725	-0.441145	0.0736953	21.2371
773	tr|A0A6Q8PFC4|A0A6Q8PFC4_HUMAN Protein TFG OS=Homo sapiens OX=9606 GN=TFG PE=1 SV=1;tr|A0A6Q8PH89|A0A6Q8PH89_HUMAN Protein TFG OS=Homo sapiens OX=9606 GN=TFG PE=1 SV=1;tr|A0A6Q8PH27|A0A6Q8PH27_HUMAN Protein TFG OS=Homo sapiens OX=9606 GN=TFG PE=1 SV=1;tr|A	A0A6Q8PFC4;A0A6Q8PH89;A0A6Q8PH27;A0A6Q8PG00;A0A6Q8PG04;A0A6Q8PGS4;A0A6Q8PF40;A0A6Q8PFY7;Q92734;C9JJP5;C9JUE0	58.121	A0A6Q8PFC4	TFG	Protein TFG	21.2118	21.9513	21.6786	21.4755	20.3534	21.3711	21.6939	21.7729	21.1404	20.311	21.2496	21.7949	21.6284	21.1704	20.9637	0.535864	0.219546	0.852182	21.3178	3.64329	-1.94434	0.00277613	0.0144033	0.415822	0.0995043	0.73214	21.3178	2.82714	-3.51341	0.0137505	0.0465337	-0.015397	-0.331715	0.300921	21.3178	-0.104683	-6.91083	0.918155	0.957251	-0.734808	-1.05113	-0.41849	21.3178
1796	tr|G5E9L0|G5E9L0_HUMAN ADP-ribosylation factor GTPase-activating protein 2 OS=Homo sapiens OX=9606 GN=ARFGAP2 PE=1 SV=2;sp|Q8N6H7|ARFG2_HUMAN ADP-ribosylation factor GTPase-activating protein 2 OS=Homo sapiens OX=9606 GN=ARFGAP2 PE=1 SV=1;tr|A0A0D9SF70|A0A	G5E9L0;Q8N6H7;A0A0D9SF70;H0YF45;H0YDX1;E9PJT7;H0YDN9;E9PK28;E9PQP3;E9PIY6	16.798	G5E9L0	ARFGAP2	ADP-ribosylation factor GTPase-activating protein 2	18.1437	18.8282	18.5247	18.2993	17.9207	18.1153	18.6604	18.639	18.1405	17.958	18.1714	18.5485	18.6153	17.9988	18.1507	0.535557	0.338168	0.732946	18.3143	5.83507	2.11392	4.85409e-05	0.00121181	0.449526	0.252137	0.646915	18.3143	4.89773	0.439023	0.000255362	0.00341573	0.00270559	-0.194683	0.200094	18.3143	0.0294783	-6.91619	0.976911	0.989187	-0.133664	-0.331053	0.0637249	18.3143
3835	sp|Q06203|PUR1_HUMAN Amidophosphoribosyltransferase OS=Homo sapiens OX=9606 GN=PPAT PE=1 SV=1;tr|D6RCC8|D6RCC8_HUMAN Amidophosphoribosyltransferase OS=Homo sapiens OX=9606 GN=PPAT PE=1 SV=1	Q06203;D6RCC8	3.3898	Q06203	PPAT	Amidophosphoribosyltransferase	15.7666	16.4494	16.2153	15.8597	15.783	15.6725	16.0577	16.0926	15.792	15.6978	15.568	16.1044	16.0555	15.9981	16.1398	0.534792	0.271835	0.797748	15.9502	4.37385	-0.539738	0.000678539	0.00590913	0.452103	0.189147	0.715059	15.9502	3.69757	-1.84238	0.00249685	0.0145973	0.214257	-0.0486998	0.477213	15.9502	1.75232	-5.44636	0.102211	0.238348	0.204502	-0.058454	0.467459	15.9502
2850	sp|P08238|HS90B_HUMAN Heat shock protein HSP 90-beta OS=Homo sapiens OX=9606 GN=HSP90AB1 PE=1 SV=4	P08238	184.72	P08238	HSP90AB1	Heat shock protein HSP 90-beta	26.5096	27.3076	26.8497	26.6012	26.0291	26.6797	26.9272	27.012	26.5614	25.9299	26.5631	27.1215	26.7289	26.4588	26.8035	0.534646	0.152625	0.916667	26.6722	3.00983	-3.1645	0.00962018	0.0318688	0.279401	-0.10262	0.661422	26.6722	1.57291	-5.63513	0.138697	0.241016	-0.0436303	-0.425651	0.338391	26.6722	-0.24562	-6.88465	0.809642	0.889265	-0.329973	-0.711994	0.0520483	26.6722
486	tr|E9PPJ9|E9PPJ9_HUMAN Elongator complex protein 4 OS=Homo sapiens OX=9606 GN=ELP4 PE=1 SV=1;tr|A0A1W2PQA7|A0A1W2PQA7_HUMAN Elongator complex protein 4 OS=Homo sapiens OX=9606 GN=ELP4 PE=1 SV=1;tr|A0A1W2PNY5|A0A1W2PNY5_HUMAN Elongator complex protein 4 OS=	E9PPJ9;A0A1W2PQA7;A0A1W2PNY5;A0A1W2PQZ6;A0A1W2PRF0;A0A1W2PRJ0;A0A1W2PPP6;A0A1X7SBS0;A0A1W2PS93;A0A1W2PR08;A0A1W2PRF5;G5E9D4;Q96EB1	5.0835	E9PPJ9	ELP4	Elongator complex protein 4	13.8465	14.7756	14.691	14.4645	13.8845	14.4179	14.3328	14.6771	14.67	13.7409	14.0276	14.7853	14.7494	14.3303	14.5566	0.533864	0.110028	0.9577	14.3967	2.70892	-3.7308	0.0173049	0.0477101	0.608505	0.184669	1.03234	14.3967	3.08766	-3.01933	0.00825834	0.0325175	0.390905	-0.032931	0.814741	14.3967	1.98352	-5.08204	0.0678636	0.18061	-0.0366809	-0.460517	0.387155	14.3967
3866	sp|Q08AF3|SLFN5_HUMAN Schlafen family member 5 OS=Homo sapiens OX=9606 GN=SLFN5 PE=1 SV=1;tr|B4E128|B4E128_HUMAN Schlafen family member 5 OS=Homo sapiens OX=9606 GN=SLFN5 PE=1 SV=1	Q08AF3;B4E128	53.167	Q08AF3	SLFN5	Schlafen family member 5	20.4935	21.0003	20.5775	20.0632	19.033	20.3996	20.9643	20.4361	19.8186	18.827	20.4392	20.9675	20.4496	19.6156	18.871	0.533294	0.326241	0.740348	20.1304	5.5392	1.59893	8.09268e-05	0.00158291	0.0436408	-0.163413	0.250694	20.1304	0.453287	-6.73213	0.657487	0.750084	-0.611603	-0.818657	-0.40455	20.1304	-6.35258	2.93968	2.04417e-05	0.000641044	-1.53375	-1.7408	-1.3267	20.1304
1689	tr|F8VR84|F8VR84_HUMAN MYG1 exonuclease OS=Homo sapiens OX=9606 GN=MYG1 PE=1 SV=1;sp|Q9HB07|MYG1_HUMAN MYG1 exonuclease OS=Homo sapiens OX=9606 GN=MYG1 PE=1 SV=3;tr|F8VQQ3|F8VQQ3_HUMAN MYG1 exonuclease OS=Homo sapiens OX=9606 GN=MYG1 PE=1 SV=1	F8VR84;Q9HB07;F8VQQ3	16.046	F8VR84	MYG1	MYG1 exonuclease	19.3142	20.0223	19.7358	19.2554	18.5869	19.2199	19.7264	19.6094	18.9634	18.2779	19.2422	19.6243	19.5873	19.1199	19.2614	0.532253	0.134124	0.930381	19.3031	2.87513	-3.41973	0.0125213	0.0377416	0.385369	-0.0127592	0.783498	19.3031	2.08169	-4.84717	0.0567629	0.125971	-0.145853	-0.543981	0.252276	19.3031	-0.787869	-6.59406	0.444283	0.618885	-0.550047	-0.948176	-0.151919	19.3031
5015	sp|Q8TCB0|IFI44_HUMAN Interferon-induced protein 44 OS=Homo sapiens OX=9606 GN=IFI44 PE=1 SV=2;tr|C9JUM8|C9JUM8_HUMAN Interferon-induced protein 44 (Fragment) OS=Homo sapiens OX=9606 GN=IFI44 PE=1 SV=1	Q8TCB0;C9JUM8	23.037	Q8TCB0	IFI44	Interferon-induced protein 44	20.7769	21.3301	21.2625	20.5784	18.1394	20.6547	21.2196	21.1634	19.6017	17.1828	20.7272	21.2045	20.9525	18.8506	17.2577	0.531747	-0.171436	1.23493	20.0601	1.6263	-5.55539	0.126814	0.204224	0.406527	-0.296656	1.10971	20.0601	1.24332	-6.06377	0.234746	0.352025	-1.04275	-1.74594	-0.339571	20.0601	-3.18916	-2.89247	0.0067661	0.0350187	-3.19299	-3.89617	-2.4898	20.0601
1386	tr|E5RFP0|E5RFP0_HUMAN NudC domain-containing protein 2 OS=Homo sapiens OX=9606 GN=NUDCD2 PE=1 SV=1;sp|Q8WVJ2|NUDC2_HUMAN NudC domain-containing protein 2 OS=Homo sapiens OX=9606 GN=NUDCD2 PE=1 SV=1	E5RFP0;Q8WVJ2	5.4083	E5RFP0	NUDCD2	NudC domain-containing protein 2	15.0671	15.8391	15.5412	15.1101	14.935	15.0717	15.4975	15.7031	15.0565	14.9056	15.0393	15.4365	15.4408	15.1017	15.3166	0.531653	0.277776	0.785529	15.2708	4.50369	-0.2939	0.000531003	0.00506042	0.502332	0.248456	0.756209	15.2708	4.25531	-0.768399	0.0008501	0.0073741	0.0300693	-0.223807	0.283946	15.2708	0.25472	-6.88225	0.802748	0.885667	-0.00701892	-0.260896	0.246858	15.2708
4530	sp|Q6NXE6|ARMC6_HUMAN Armadillo repeat-containing protein 6 OS=Homo sapiens OX=9606 GN=ARMC6 PE=1 SV=2;tr|F5GZP0|F5GZP0_HUMAN Armadillo repeat-containing protein 6 OS=Homo sapiens OX=9606 GN=ARMC6 PE=1 SV=1;tr|F5H3X1|F5H3X1_HUMAN Armadillo repeat-containin	Q6NXE6;F5GZP0;F5H3X1;F5H052;H0YGQ5;F5H2X2;F5H2K4;F5GWV0;F5H4P3;B4E1N1	13.521	Q6NXE6	ARMC6	Armadillo repeat-containing protein 6	16.6994	17.4392	17.1076	16.5136	16.3886	16.5429	16.9988	16.9239	16.5648	16.2748	16.6636	17.0627	16.9013	16.3272	16.5936	0.531584	0.278072	0.785096	16.7335	4.50958	-0.282779	0.00052515	0.00501968	0.342274	0.0887625	0.595786	16.7335	2.90361	-3.36932	0.0118435	0.0419629	-0.166765	-0.420277	0.0867474	16.7335	-1.41471	-5.92476	0.179628	0.346729	-0.2163	-0.469812	0.0372122	16.7335
6352	sp|Q9Y248|PSF2_HUMAN DNA replication complex GINS protein PSF2 OS=Homo sapiens OX=9606 GN=GINS2 PE=1 SV=1	Q9Y248	18.86	Q9Y248	GINS2	DNA replication complex GINS protein PSF2	17.4345	18.0674	18.0018	17.0944	17.2286	17.496	18.0613	17.778	17.2258	17.0327	17.6063	18.0025	18.0315	17.2667	17.8571	0.531466	0.197854	0.865079	17.6123	3.42607	-2.36474	0.00424868	0.0187566	0.424859	0.0912464	0.758471	17.6123	2.73883	-3.67858	0.0163287	0.0522972	-0.316648	-0.650261	0.016964	17.6123	-2.04126	-4.98712	0.0611151	0.167632	-0.139489	-0.473102	0.194123	17.6123
5913	sp|Q9NQX3|GEPH_HUMAN Gephyrin OS=Homo sapiens OX=9606 GN=GPHN PE=1 SV=1;tr|F5H039|F5H039_HUMAN Molybdopterin molybdenumtransferase OS=Homo sapiens OX=9606 GN=GPHN PE=1 SV=1	Q9NQX3;F5H039	28.46	Q9NQX3	GPHN	Gephyrin	18.6584	19.3567	19.2177	19.0136	18.807	18.7124	19.2026	19.211	19.1015	18.6762	18.7144	19.1202	19.0973	18.7611	18.3631	0.531442	0.291404	0.77148	18.9342	4.76144	0.189197	0.000328245	0.00382012	0.480256	0.240217	0.720294	18.9342	4.30284	-0.677737	0.000776505	0.00694383	0.263648	0.02361	0.503686	18.9342	2.36215	-4.43569	0.0336543	0.110168	-0.0796092	-0.319647	0.160429	18.9342
4169	sp|Q15555|MARE2_HUMAN Microtubule-associated protein RP/EB family member 2 OS=Homo sapiens OX=9606 GN=MAPRE2 PE=1 SV=1	Q15555	5.742	Q15555	MAPRE2	Microtubule-associated protein RP/EB family member 2	16.8106	17.3388	17.0409	16.4139	16.3341	16.6202	17.1976	16.7987	16.3566	16.1068	16.7795	17.266	16.7783	16.153	16.5177	0.530697	0.295706	0.765688	16.7009	4.8569	0.366266	0.000275246	0.00346288	0.135867	-0.0991243	0.370857	16.7009	1.24344	-6.06363	0.234704	0.352025	-0.428955	-0.663946	-0.193964	16.7009	-3.92576	-1.46457	0.00160204	0.0122874	-0.417244	-0.652235	-0.182254	16.7009
5208	sp|Q96AT1|K1143_HUMAN Uncharacterized protein KIAA1143 OS=Homo sapiens OX=9606 GN=KIAA1143 PE=1 SV=2	Q96AT1	4.116	Q96AT1	KIAA1143	Uncharacterized protein KIAA1143	14.4396	15.1339	14.7693	14.1946	14.3139	14.4248	14.8225	14.9384	14.2285	14.2257	14.3401	14.84	14.8612	14.1016	14.7857	0.530655	0.261753	0.799556	14.5613	4.24406	-0.786944	0.00086854	0.00686848	0.45482	0.185919	0.723721	14.5613	3.63755	-1.95859	0.00280743	0.0158589	-0.226605	-0.495506	0.0422964	14.5613	-1.81234	-5.35437	0.0920517	0.221886	0.0402672	-0.228634	0.309169	14.5613
854	tr|A0A7I2V5R1|A0A7I2V5R1_HUMAN Serine/threonine-protein kinase Nek9 OS=Homo sapiens OX=9606 GN=NEK9 PE=1 SV=1;sp|Q8TD19|NEK9_HUMAN Serine/threonine-protein kinase Nek9 OS=Homo sapiens OX=9606 GN=NEK9 PE=1 SV=2;tr|G3V5V0|G3V5V0_HUMAN Serine/threonine-protei	A0A7I2V5R1;Q8TD19;G3V5V0;G3V2Z5;A0A7I2V454	8.8248	A0A7I2V5R1	NEK9	Serine/threonine-protein kinase Nek9	17.9144	18.4948	18.6521	18.4167	17.9011	17.8098	18.3544	18.5137	18.4195	17.8017	17.9581	18.4242	18.4448	18.0904	17.8562	0.530334	0.335151	0.725516	18.2035	5.84348	2.12838	4.7849e-05	0.00120876	0.642761	0.447578	0.837943	18.2035	7.08225	4.14487	6.42726e-06	0.000335429	0.414771	0.219588	0.609953	18.2035	4.57015	-0.230267	0.000468715	0.00513569	-0.0410822	-0.236265	0.1541	18.2035
2971	sp|P14550|AK1A1_HUMAN Aldo-keto reductase family 1 member A1 OS=Homo sapiens OX=9606 GN=AKR1A1 PE=1 SV=3;tr|V9GYG2|V9GYG2_HUMAN Aldo-keto reductase family 1 member A1 OS=Homo sapiens OX=9606 GN=AKR1A1 PE=1 SV=1;tr|V9GYP9|V9GYP9_HUMAN Aldo-keto reductase fa	P14550;V9GYG2;V9GYP9;Q5T621	45.208	P14550	AKR1A1	Aldo-keto reductase family 1 member A1	21.4951	22.2885	22.2401	21.8768	21.0957	21.4704	21.9158	22.158	21.8384	20.9527	21.5243	21.8737	22.0115	21.5855	21.2652	0.529382	0.277808	0.780955	21.7061	4.5255	-0.252758	0.000509671	0.00493846	0.63993	0.388356	0.891504	21.7061	5.47054	1.47526	9.12764e-05	0.00182376	0.270321	0.018747	0.521895	21.7061	2.31088	-4.52624	0.0370741	0.11783	-0.392075	-0.643649	-0.140501	21.7061
1650	tr|F5H3P3|F5H3P3_HUMAN Rho GDP-dissociation inhibitor 2 (Fragment) OS=Homo sapiens OX=9606 GN=ARHGDIB PE=1 SV=8;sp|P52566|GDIR2_HUMAN Rho GDP-dissociation inhibitor 2 OS=Homo sapiens OX=9606 GN=ARHGDIB PE=1 SV=3;tr|H0YGX7|H0YGX7_HUMAN Rho GDP-dissociation	F5H3P3;P52566;H0YGX7;F5H2R5;F5H6Q0	19.001	F5H3P3	ARHGDIB	Rho GDP-dissociation inhibitor 2 (Fragment)	18.5338	19.1207	18.668	17.9708	17.5355	18.3949	18.9561	18.4149	17.7645	17.335	18.4274	18.8671	18.502	17.9501	19.0137	0.529259	-0.11496	1.17348	18.3636	1.76684	-5.34704	0.0996655	0.170832	0.0762513	-0.567967	0.72047	18.3636	0.254552	-6.80605	0.802876	0.864292	-0.556909	-1.20113	0.0873102	18.3636	-1.85915	-5.28133	0.0847654	0.20956	-0.490667	-1.13489	0.153552	18.3636
1390	tr|E5RG17|E5RG17_HUMAN Putative deoxyribonuclease TATDN1 (Fragment) OS=Homo sapiens OX=9606 GN=TATDN1 PE=1 SV=1;sp|Q6P1N9|TATD1_HUMAN Putative deoxyribonuclease TATDN1 OS=Homo sapiens OX=9606 GN=TATDN1 PE=1 SV=2;tr|E5RGF2|E5RGF2_HUMAN Putative deoxyribonuc	E5RG17;Q6P1N9;E5RGF2;A0A0D9SGD3;H0YBX2;G5EA19;U3KQS5;E5RG62;E5RK70	34.497	E5RG17	TATDN1	Putative deoxyribonuclease TATDN1 (Fragment)	18.512	19.1512	18.8821	18.6794	18.0679	18.498	18.9934	18.8219	18.5865	18.0276	18.5326	18.9829	18.6833	18.5039	18.456	0.528313	0.307941	0.748684	18.6253	5.15583	0.913727	0.000159768	0.00246865	0.281549	0.061177	0.50192	18.6253	2.74765	-3.66216	0.0160515	0.0518256	0.075735	-0.144636	0.296107	18.6253	0.739102	-6.632	0.472404	0.643945	-0.330337	-0.550708	-0.109965	18.6253
1517	tr|E9PHR9|E9PHR9_HUMAN Phospholipid scramblase OS=Homo sapiens OX=9606 GN=PLSCR4 PE=1 SV=1;sp|Q9NRQ2|PLS4_HUMAN Phospholipid scramblase 4 OS=Homo sapiens OX=9606 GN=PLSCR4 PE=1 SV=2	E9PHR9;Q9NRQ2	2.8416	E9PHR9	PLSCR4	Phospholipid scramblase	13.7953	14.3885	14.3114	14.6084	14.2449	13.8084	14.2852	14.5007	14.767	14.0371	13.7449	14.2592	14.5815	14.7485	14.1727	0.528086	0.353079	0.703092	14.2836	6.48954	3.20854	1.6361e-05	0.000676324	0.681655	0.506648	0.856661	14.2836	8.37671	6.02349	9.77159e-07	9.01677e-05	0.925067	0.750061	1.10007	14.2836	11.368	9.61557	2.50665e-08	8.7402e-06	0.368673	0.193667	0.54368	14.2836
2332	sp|O15067|PUR4_HUMAN Phosphoribosylformylglycinamidine synthase OS=Homo sapiens OX=9606 GN=PFAS PE=1 SV=4	O15067	9.8396	O15067	PFAS	Phosphoribosylformylglycinamidine synthase	19.2389	19.9145	19.5164	19.1381	18.96	19.1147	19.6187	19.3844	18.9383	18.8424	19.1208	19.5243	19.3263	18.8756	19.3053	0.527688	0.261443	0.793934	19.2546	4.26244	-0.751853	0.000838611	0.00674788	0.250866	-0.0153793	0.517111	19.2546	2.02639	-4.93889	0.0627915	0.135707	-0.174151	-0.440396	0.092094	19.2546	-1.40672	-5.9352	0.181938	0.350235	-0.122238	-0.388483	0.144007	19.2546
4626	sp|Q71RG4|TMUB2_HUMAN Transmembrane and ubiquitin-like domain-containing protein 2 OS=Homo sapiens OX=9606 GN=TMUB2 PE=1 SV=2;tr|K7EKW3|K7EKW3_HUMAN Transmembrane and ubiquitin-like domain-containing protein 2 (Fragment) OS=Homo sapiens OX=9606 GN=TMUB2 PE	Q71RG4;K7EKW3;E7ESS3	23.916	Q71RG4	TMUB2	Transmembrane and ubiquitin-like domain-containing protein 2	15.7935	16.417	15.9685	16.1101	15.8453	15.911	16.2614	15.9282	15.9685	15.8223	15.8161	16.4222	15.7139	16.0943	16.129	0.526668	0.324644	0.728692	16.0134	5.60657	1.71727	7.19588e-05	0.00151685	0.029985	-0.172039	0.232009	16.0134	0.319201	-6.78648	0.754422	0.827745	0.217439	0.0154149	0.419463	16.0134	2.31471	-4.51949	0.0368072	0.117333	0.0920147	-0.110009	0.294039	16.0134
2273	sp|O00635|TRI38_HUMAN E3 ubiquitin-protein ligase TRIM38 OS=Homo sapiens OX=9606 GN=TRIM38 PE=1 SV=1	O00635	3.2283	O00635	TRIM38	E3 ubiquitin-protein ligase TRIM38	16.356	16.9046	16.6769	16.0483	14.8274	16.3736	16.9539	16.4661	15.9597	14.6463	16.3674	16.8184	16.4898	15.6572	15.2387	0.526619	0.244011	0.809227	16.119	4.00752	-1.24064	0.00136778	0.00911578	0.178595	-0.104013	0.461203	16.119	1.35909	-5.92179	0.19622	0.311243	-0.477252	-0.75986	-0.194645	16.119	-3.63184	-2.03482	0.00283896	0.0189841	-1.46154	-1.74415	-1.17893	16.119
1430	tr|E7EQ61|E7EQ61_HUMAN UFM1-activating enzyme OS=Homo sapiens OX=9606 GN=UBA5 PE=1 SV=1;sp|Q9GZZ9|UBA5_HUMAN Ubiquitin-like modifier-activating enzyme 5 OS=Homo sapiens OX=9606 GN=UBA5 PE=1 SV=1;tr|E7EWE1|E7EWE1_HUMAN UFM1-activating enzyme OS=Homo sapiens	E7EQ61;Q9GZZ9;E7EWE1;C9J5W5;C9J0F6;C9JRV9	13.655	E7EQ61	UBA5	UFM1-activating enzyme	19.5344	20.245	20.0196	19.6503	18.7926	19.4923	19.9	19.9101	19.4683	18.6924	19.5629	20.0241	19.8032	19.442	19.2467	0.526495	0.250952	0.802039	19.5856	4.10929	-1.045	0.00112432	0.00807103	0.381091	0.105547	0.656635	19.5856	2.97441	-3.23518	0.0103115	0.0380818	-0.00969897	-0.285243	0.265845	19.5856	-0.0757004	-6.91361	0.940759	0.970487	-0.619292	-0.894836	-0.343748	19.5856
6294	sp|Q9ULZ3|ASC_HUMAN Apoptosis-associated speck-like protein containing a CARD OS=Homo sapiens OX=9606 GN=PYCARD PE=1 SV=2	Q9ULZ3	12.462	Q9ULZ3	PYCARD	Apoptosis-associated speck-like protein containing a CARD	19.3475	20.1351	20.3517	19.8519	18.828	19.3298	19.8421	20.1939	19.6973	18.4929	19.4275	19.7061	20.1676	19.7158	19.4713	0.526193	0.134257	0.91813	19.6372	2.8873	-3.39676	0.012227	0.0371007	0.869445	0.477508	1.26138	19.6372	4.77078	0.203834	0.000322624	0.0040147	0.386705	-0.00523184	0.778641	19.6372	2.12191	-4.85217	0.0527204	0.150604	-0.437534	-0.82947	-0.0455973	19.6372
4611	sp|Q6ZSB9|ZBT49_HUMAN Zinc finger and BTB domain-containing protein 49 OS=Homo sapiens OX=9606 GN=ZBTB49 PE=1 SV=3	Q6ZSB9	1.7536	Q6ZSB9	ZBTB49	Zinc finger and BTB domain-containing protein 49	19.5437	20.1593	19.8899	19.532	19.0477	19.3726	19.8889	19.8509	19.2631	18.7642	19.4405	19.8868	19.611	19.115	19.4709	0.52603	0.189506	0.862554	19.5224	3.36169	-2.48914	0.00482112	0.0201916	0.331654	-0.00486983	0.668178	19.5224	2.11949	-4.78376	0.0529553	0.119903	-0.148918	-0.485442	0.187606	19.5224	-0.951686	-6.45069	0.357857	0.544873	-0.358011	-0.694535	-0.0214871	19.5224
3548	sp|P55060|XPO2_HUMAN Exportin-2 OS=Homo sapiens OX=9606 GN=CSE1L PE=1 SV=3	P55060	112.69	P55060	CSE1L	Exportin-2	22.7746	23.4548	23.3441	22.8471	22.3749	22.7787	23.276	23.1661	22.8277	22.3573	22.849	23.2471	23.1113	22.7918	22.9221	0.525189	0.258415	0.791962	22.9415	4.23385	-0.806448	0.000885637	0.00694331	0.406414	0.139641	0.673187	22.9415	3.27634	-2.65703	0.00570108	0.0253713	0.0214434	-0.24533	0.288217	22.9415	0.172867	-6.90079	0.865301	0.924866	-0.249327	-0.516101	0.0174462	22.9415
410	tr|A0A0J9YY79|A0A0J9YY79_HUMAN Phosphatidylinositide phosphatase SAC2 (Fragment) OS=Homo sapiens OX=9606 GN=INPP5F PE=1 SV=1	A0A0J9YY79	2.9344	A0A0J9YY79	INPP5F	Phosphatidylinositide phosphatase SAC2 (Fragment)	18.6914	19.249	18.9808	19.3042	19.6801	18.8403	19.31	18.9696	19.363	19.8068	18.8448	19.3896	19.1664	19.7586	20.0493	0.524021	0.267723	0.78032	19.2936	4.39709	-0.495616	0.000649313	0.00578926	0.246745	-0.00955342	0.503044	19.2936	2.07045	-4.86592	0.0579431	0.127804	0.683068	0.426769	0.939367	19.2936	5.73166	1.88405	5.79547e-05	0.00123805	1.05322	0.796926	1.30952	19.2936
3502	sp|P52788|SPSY_HUMAN Spermine synthase OS=Homo sapiens OX=9606 GN=SMS PE=1 SV=2	P52788	9.6108	P52788	SMS	Spermine synthase	18.4335	19.1595	18.5879	18.1578	17.9727	18.4082	18.8899	18.5031	17.8046	17.5715	18.4509	18.8151	18.2684	17.6909	18.118	0.523962	0.205381	0.842543	18.3221	3.53706	-2.15	0.00341765	0.0163954	0.0222816	-0.2963	0.340863	18.3221	0.150414	-6.82836	0.882645	0.918868	-0.546405	-0.864987	-0.227824	18.3221	-3.68857	-1.92464	0.00254114	0.0174857	-0.543452	-0.862033	-0.22487	18.3221
968	tr|A6NFX8|A6NFX8_HUMAN ADP-sugar pyrophosphatase OS=Homo sapiens OX=9606 GN=NUDT5 PE=1 SV=1;sp|Q9UKK9|NUDT5_HUMAN ADP-sugar pyrophosphatase OS=Homo sapiens OX=9606 GN=NUDT5 PE=1 SV=1;tr|A6NCQ0|A6NCQ0_HUMAN ADP-sugar pyrophosphatase OS=Homo sapiens OX=9606	A6NFX8;Q9UKK9;A6NCQ0;A6NJU6;H0YEY4	25.592	A6NFX8	NUDT5	ADP-sugar pyrophosphatase	20.7588	21.428	21.2327	20.8423	19.9431	20.7429	21.3176	21.1854	20.722	19.539	20.7848	21.1125	20.9869	20.5413	20.2167	0.523873	0.218211	0.829535	20.7569	3.68593	-1.86179	0.00255423	0.0136526	0.372843	0.0671807	0.678505	20.7569	2.62329	-3.89244	0.0204233	0.0610206	-0.0602777	-0.36594	0.245385	20.7569	-0.424109	-6.82167	0.678115	0.801351	-0.86257	-1.16823	-0.556908	20.7569
5481	sp|Q9BPX3|CND3_HUMAN Condensin complex subunit 3 OS=Homo sapiens OX=9606 GN=NCAPG PE=1 SV=1	Q9BPX3	38.617	Q9BPX3	NCAPG	Condensin complex subunit 3	19.6781	20.2053	20.2119	19.5566	19.9041	19.6336	20.1631	20.0749	19.4977	19.6312	19.6684	20.1824	19.9554	19.5348	20.063	0.523561	0.321639	0.725484	19.864	5.57629	1.66417	7.58531e-05	0.0015477	0.420708	0.218786	0.622631	19.864	4.48084	-0.339892	0.00055434	0.00564064	-0.13032	-0.332242	0.0716028	19.864	-1.388	-5.9595	0.187447	0.357272	0.206059	0.0041365	0.407982	19.864
2945	sp|P12955|PEPD_HUMAN Xaa-Pro dipeptidase OS=Homo sapiens OX=9606 GN=PEPD PE=1 SV=3;tr|K7ES25|K7ES25_HUMAN Xaa-Pro dipeptidase (Fragment) OS=Homo sapiens OX=9606 GN=PEPD PE=1 SV=3;tr|A0A494C165|A0A494C165_HUMAN Xaa-Pro dipeptidase (Fragment) OS=Homo sapiens	P12955;K7ES25;A0A494C165;A0A494C194	45.889	P12955	PEPD	Xaa-Pro dipeptidase	18.6456	19.3763	19.2615	18.8553	18.2321	18.7358	19.12	19.2647	18.768	17.9524	18.744	19.1993	19.0161	18.4775	18.5946	0.52341	0.216947	0.829873	18.8162	3.67305	-1.88673	0.00261931	0.0138601	0.472312	0.165848	0.778775	18.8162	3.31446	-2.58352	0.0052897	0.0240912	-0.00815816	-0.314621	0.298305	18.8162	-0.0572502	-6.91491	0.955178	0.977756	-0.448757	-0.75522	-0.142294	18.8162
4673	sp|Q7Z422|SZRD1_HUMAN SUZ domain-containing protein 1 OS=Homo sapiens OX=9606 GN=SZRD1 PE=1 SV=1	Q7Z422	4.9403	Q7Z422	SZRD1	SUZ domain-containing protein 1	15.3517	16.1026	16.0142	15.4818	15.1274	15.4893	15.7919	15.85	15.3261	15.0962	15.3205	15.836	15.7266	15.5153	15.9031	0.522985	0.154134	0.891835	15.5955	3.04931	-3.08927	0.00890366	0.0302943	0.47642	0.10757	0.845271	15.5955	2.77781	-3.60584	0.0151371	0.0497308	0.05393	-0.31492	0.422781	15.5955	0.314444	-6.86428	0.757953	0.85563	-0.0116079	-0.380458	0.357243	15.5955
497	tr|A0A1W2PQS6|A0A1W2PQS6_HUMAN RPS10-NUDT3 readthrough OS=Homo sapiens OX=9606 GN=RPS10-NUDT3 PE=3 SV=1;tr|F6U211|F6U211_HUMAN 40S ribosomal protein S10 OS=Homo sapiens OX=9606 GN=RPS10 PE=3 SV=1;tr|A0A2R8Y7H1|A0A2R8Y7H1_HUMAN 40S ribosomal protein S10 OS=	A0A1W2PQS6;F6U211;A0A2R8Y7H1;A0A2R8YFH6;S4R435;A0A2R8Y6L3	5.5064	A0A1W2PQS6	RPS10-NUDT3	RPS10-NUDT3 readthrough	16.704	17.4993	17.3864	16.9294	16.121	16.676	17.1353	17.3023	16.9024	15.6738	16.787	17.0982	17.1104	16.7753	16.6048	0.521923	0.141149	0.902698	16.847	2.94782	-3.28229	0.0108624	0.0343146	0.544051	0.163276	0.924826	16.847	3.0728	-3.04773	0.00850269	0.0333148	0.146671	-0.234104	0.527445	16.847	0.828396	-6.56085	0.42174	0.601837	-0.589121	-0.969896	-0.208346	16.847
5669	sp|Q9GZP4|PITH1_HUMAN PITH domain-containing protein 1 OS=Homo sapiens OX=9606 GN=PITHD1 PE=1 SV=1;tr|X6R8S9|X6R8S9_HUMAN PITH domain-containing protein 1 OS=Homo sapiens OX=9606 GN=PITHD1 PE=1 SV=1	Q9GZP4;X6R8S9	5.679	Q9GZP4	PITHD1	PITH domain-containing protein 1	17.9474	18.6542	18.5498	18.1571	17.4488	17.6696	18.1223	18.007	17.695	16.704	17.162	17.5682	17.5993	17.3402	16.9314	0.521906	-0.157427	1.20124	17.7038	1.65224	-5.51778	0.121365	0.197194	0.459058	-0.220275	1.13839	17.7038	1.45327	-5.79926	0.16882	0.279116	0.137808	-0.541525	0.817141	17.7038	0.436269	-6.81618	0.669484	0.795531	-0.564904	-1.24424	0.114428	17.7038
6356	sp|Q9Y266|NUDC_HUMAN Nuclear migration protein nudC OS=Homo sapiens OX=9606 GN=NUDC PE=1 SV=1	Q9Y266	43.674	Q9Y266	NUDC	Nuclear migration protein nudC	22.9799	23.6997	23.3324	22.9323	22.5723	22.9652	23.3942	23.3254	22.6439	22.438	23.0137	23.4301	23.1302	22.663	23.1267	0.521762	0.202539	0.840985	23.0431	3.51513	-2.19246	0.00356775	0.0168489	0.276406	-0.0428172	0.595629	23.0431	1.86216	-5.20324	0.0843151	0.16703	-0.239861	-0.559084	0.0793623	23.0431	-1.61595	-5.64797	0.129045	0.279233	-0.273938	-0.593161	0.0452856	23.0431
3889	sp|Q12834|CDC20_HUMAN Cell division cycle protein 20 homolog OS=Homo sapiens OX=9606 GN=CDC20 PE=1 SV=2	Q12834	17.281	Q12834	CDC20	Cell division cycle protein 20 homolog	17.056	17.5504	17.2042	16.6817	17.6446	17.06	17.5224	17.3269	16.7844	17.5347	17.1565	17.7649	17.1687	16.9333	17.3202	0.52169	0.314367	0.729014	17.2473	5.41161	1.37309	0.000101261	0.00181561	0.142398	-0.0649254	0.349722	17.2473	1.47713	-5.76727	0.162409	0.271906	-0.291027	-0.498351	-0.0837033	17.2473	-3.01889	-3.21917	0.0094509	0.0446323	0.408967	0.201643	0.616291	17.2473
5809	sp|Q9H993|ARMT1_HUMAN Damage-control phosphatase ARMT1 OS=Homo sapiens OX=9606 GN=ARMT1 PE=1 SV=1;tr|F5GZY1|F5GZY1_HUMAN Sugar phosphate phosphatase OS=Homo sapiens OX=9606 GN=ARMT1 PE=1 SV=1	Q9H993;F5GZY1	13.171	Q9H993	ARMT1	Damage-control phosphatase ARMT1	18.5723	19.1964	19.0998	18.436	17.6239	18.332	18.915	18.856	18.3489	17.1099	18.4111	18.765	18.8155	18.1837	18.0692	0.520321	0.117852	0.92279	18.449	2.78036	-3.59768	0.0150621	0.0429593	0.485285	0.0828162	0.887754	18.449	2.59315	-3.94777	0.0216458	0.0636758	-0.115589	-0.518058	0.28688	18.449	-0.617657	-6.71667	0.547	0.70633	-0.837488	-1.23996	-0.435018	18.449
3056	sp|P20073|ANXA7_HUMAN Annexin A7 OS=Homo sapiens OX=9606 GN=ANXA7 PE=1 SV=3	P20073	57.546	P20073	ANXA7	Annexin A7	21.2345	21.9742	21.9025	21.3056	20.4702	21.1256	21.6006	21.7351	20.9991	20.164	21.2622	21.6067	21.5143	20.8836	21.0271	0.51971	0.1204	0.919021	21.2537	2.79907	-3.56267	0.0145235	0.041827	0.509856	0.110546	0.909167	21.2537	2.746	-3.66523	0.0161031	0.051883	-0.144658	-0.543968	0.254653	21.2537	-0.779102	-6.60104	0.449258	0.623902	-0.653676	-1.05299	-0.254366	21.2537
4811	sp|Q8IWT0|ARCH_HUMAN Protein archease OS=Homo sapiens OX=9606 GN=ZBTB8OS PE=1 SV=2	Q8IWT0	3.1318	Q8IWT0	ZBTB8OS	Protein archease	12.5695	12.9661	13.2946	12.6787	12.559	12.5228	13.3388	13.1767	12.9492	12.3598	12.5764	12.9196	12.6762	12.5522	12.6905	0.518593	0.179181	0.858004	12.7887	3.28597	-2.63523	0.0055943	0.0222722	0.492912	0.1535	0.832323	12.7887	3.12324	-2.95123	0.00770125	0.0310537	0.170457	-0.168955	0.509868	12.7887	1.08007	-6.32194	0.298885	0.48675	-0.0198293	-0.359241	0.319582	12.7887
384	tr|A2ACR1|A2ACR1_HUMAN Proteasome subunit beta OS=Homo sapiens OX=9606 GN=PSMB9 PE=1 SV=1;tr|A0A0G2JJA7|A0A0G2JJA7_HUMAN Proteasome subunit beta OS=Homo sapiens OX=9606 GN=PSMB9 PE=1 SV=1;sp|P28065|PSB9_HUMAN Proteasome subunit beta type-9 OS=Homo sapiens	A2ACR1;A0A0G2JJA7;P28065	25.274	A2ACR1	PSMB9	Proteasome subunit beta	21.065	21.6677	21.3094	20.583	19.3268	20.9854	21.4748	21.241	19.8834	18.626	21.0756	21.5392	21.1079	19.6546	19.6418	0.518579	0.0189562	1.0182	20.6121	2.23221	-4.58789	0.0429661	0.0913612	0.177432	-0.322191	0.677055	20.6121	0.763752	-6.5373	0.458055	0.578445	-1.00163	-1.50125	-0.502006	20.6121	-4.31149	-0.721933	0.000763827	0.00726834	-1.8438	-2.34343	-1.34418	20.6121
3905	sp|Q12962|TAF10_HUMAN Transcription initiation factor TFIID subunit 10 OS=Homo sapiens OX=9606 GN=TAF10 PE=1 SV=1	Q12962	11.174	Q12962	TAF10	Transcription initiation factor TFIID subunit 10	12.6523	12.3775	12.2676	12.6066	12.4598	12.4496	13.4628	12.7424	12.6981	13.6784	12.3654	13.182	12.2347	12.3842	13.6092	0.518308	-0.133778	1.17039	12.7447	1.70941	-5.43353	0.110071	0.1833	-0.0742122	-0.726299	0.577874	12.7447	-0.244756	-6.80863	0.810298	0.868547	0.073845	-0.578242	0.725932	12.7447	0.243545	-6.88519	0.811217	0.890227	0.759998	0.107912	1.41208	12.7447
5618	sp|Q9BXS6|NUSAP_HUMAN Nucleolar and spindle-associated protein 1 OS=Homo sapiens OX=9606 GN=NUSAP1 PE=1 SV=1	Q9BXS6	12.579	Q9BXS6	NUSAP1	Nucleolar and spindle-associated protein 1	19.427	19.8738	19.6564	19.6859	19.9227	19.474	19.9506	19.8179	19.6749	19.9577	19.3649	19.9965	19.5754	19.545	19.3004	0.518301	0.22576	0.810843	19.6815	3.81029	-1.62121	0.00200453	0.0116379	0.261243	-0.0312982	0.553785	19.6815	1.92053	-5.11073	0.075998	0.15499	0.213289	-0.0792529	0.50583	19.6815	1.56799	-5.71627	0.139839	0.293693	0.30496	0.012418	0.597501	19.6815
4415	tr|Q5T6H7|Q5T6H7_HUMAN Xaa-Pro aminopeptidase 1 OS=Homo sapiens OX=9606 GN=XPNPEP1 PE=1 SV=1;sp|Q9NQW7|XPP1_HUMAN Xaa-Pro aminopeptidase 1 OS=Homo sapiens OX=9606 GN=XPNPEP1 PE=1 SV=3	Q5T6H7;Q9NQW7	57.591	Q5T6H7	XPNPEP1	Xaa-Pro aminopeptidase 1	20.6209	21.3212	21.2153	20.9871	20.0915	20.675	21.1073	21.1784	20.8265	19.9861	20.6346	21.0568	21.0586	20.7848	20.6658	0.518265	0.219954	0.816575	20.814	3.73634	-1.76424	0.00231501	0.0127156	0.50725	0.208939	0.80556	20.814	3.65693	-1.92107	0.00270312	0.0153942	0.222628	-0.075683	0.520938	20.814	1.60499	-5.66369	0.131446	0.282517	-0.395741	-0.694052	-0.0974307	20.814
2928	sp|P11413|G6PD_HUMAN Glucose-6-phosphate 1-dehydrogenase OS=Homo sapiens OX=9606 GN=G6PD PE=1 SV=4;tr|E7EUI8|E7EUI8_HUMAN Glucose-6-phosphate 1-dehydrogenase (Fragment) OS=Homo sapiens OX=9606 GN=G6PD PE=1 SV=8;tr|E7EM57|E7EM57_HUMAN Glucose-6-phosphate 1-	P11413;E7EUI8;E7EM57;E9PD92	65.186	P11413	G6PD	Glucose-6-phosphate 1-dehydrogenase	22.9594	23.6532	23.8429	23.6081	22.832	22.9052	23.4926	23.7627	23.5262	22.7325	23.0257	23.2989	23.6083	23.3175	22.7214	0.518135	0.305907	0.730363	23.2858	5.25053	1.08482	0.000134808	0.00220048	0.774545	0.562317	0.986773	23.2858	7.84887	5.28477	2.05468e-06	0.000153907	0.52051	0.308282	0.732738	23.2858	5.2746	1.0725	0.000129138	0.0021918	-0.20148	-0.413708	0.010748	23.2858
1617	tr|F5GXB9|F5GXB9_HUMAN Anaphase-promoting complex subunit 15 (Fragment) OS=Homo sapiens OX=9606 GN=ANAPC15 PE=1 SV=8;tr|F5H2T3|F5H2T3_HUMAN Anaphase-promoting complex subunit 15 (Fragment) OS=Homo sapiens OX=9606 GN=ANAPC15 PE=1 SV=1;tr|F8WDQ6|F8WDQ6_HUMAN	F5GXB9;F5H2T3;F8WDQ6;F5H3R3;F5H6E4;G5EA39;P60006	10.361	F5GXB9	ANAPC15	Anaphase-promoting complex subunit 15 (Fragment)	9.01514	NA	10.0198	9.53402	9.38021	9.4507	NA	10.3712	10.0114	9.67139	9.38752	9.80249	9.64541	9.42352	9.67878	0.518036	-0.0910839	1.12716	9.64551	1.85999	-4.89312	0.0884027	0.156109	0.72769	0.296978	1.1584	9.64551	3.69499	-2.02132	0.00323408	0.01738	0.371862	-0.0588508	0.802575	9.64551	1.8882	-5.24679	0.0842408	0.208738	0.292345	-0.138368	0.723057	9.64551
3347	sp|P45985|MP2K4_HUMAN Dual specificity mitogen-activated protein kinase kinase 4 OS=Homo sapiens OX=9606 GN=MAP2K4 PE=1 SV=1	P45985	4.1998	P45985	MAP2K4	Dual specificity mitogen-activated protein kinase kinase 4	14.6969	15.3782	15.5598	15.0742	14.3395	14.9374	15.3749	15.3038	15.0115	14.5493	14.7427	15.1773	15.107	14.6282	14.5507	0.517794	0.233756	0.801831	14.9621	3.92052	-1.4083	0.00161837	0.0101104	0.531202	0.247165	0.81524	14.9621	4.02205	-1.21569	0.00132996	0.0097332	0.112278	-0.17176	0.396315	14.9621	0.850119	-6.54243	0.409969	0.591135	-0.312537	-0.596575	-0.0284996	14.9621
3265	sp|P36507|MP2K2_HUMAN Dual specificity mitogen-activated protein kinase kinase 2 OS=Homo sapiens OX=9606 GN=MAP2K2 PE=1 SV=1;tr|G5E9C7|G5E9C7_HUMAN Dual-specificity mitogen-activated protein kinase kinase 2 OS=Homo sapiens OX=9606 GN=MAP2K2 PE=1 SV=1	P36507;G5E9C7	16.065	P36507	MAP2K2	Dual specificity mitogen-activated protein kinase kinase 2	19.5928	20.3505	20.1585	19.8289	19.0981	19.4948	20.0493	20.1464	19.593	18.8592	19.5829	19.8221	19.7976	19.2794	19.2649	0.517146	0.176087	0.858205	19.6612	3.26096	-2.68339	0.00587593	0.0230476	0.477331	0.136271	0.81839	19.6612	3.0099	-3.16769	0.00961884	0.0361103	0.0102467	-0.330813	0.351306	19.6612	0.0646123	-6.91443	0.949422	0.974771	-0.482793	-0.823852	-0.141734	19.6612
2304	sp|O14777|NDC80_HUMAN Kinetochore protein NDC80 homolog OS=Homo sapiens OX=9606 GN=NDC80 PE=1 SV=1	O14777	11.5	O14777	NDC80	Kinetochore protein NDC80 homolog	18.309	18.8	18.768	18.3574	18.6237	18.4704	19.0236	18.7158	18.393	18.5869	18.4074	18.9089	18.6197	18.1147	18.576	0.515245	0.334332	0.696158	18.5783	6.12501	2.60649	2.9764e-05	0.000952148	0.305576	0.124663	0.486489	18.5783	3.63255	-1.96828	0.00283503	0.0158911	-0.107229	-0.288142	0.0736841	18.5783	-1.27469	-6.10118	0.223757	0.402785	0.199941	0.0190275	0.380854	18.5783
6440	tr|V9GY01|V9GY01_HUMAN Chromosome 15 open reading frame 23, isoform CRA_d OS=Homo sapiens OX=9606 GN=KNSTRN PE=1 SV=1;sp|Q9Y448|SKAP_HUMAN Small kinetochore-associated protein OS=Homo sapiens OX=9606 GN=KNSTRN PE=1 SV=2	V9GY01;Q9Y448	7.0583	V9GY01	KNSTRN	Chromosome 15 open reading frame 23, isoform CRA_d	15.1326	15.6436	15.4558	14.986	15.7158	15.2722	15.7003	15.3866	15.2936	15.8151	15.1524	15.7567	15.3795	15.0839	15.3203	0.514465	0.273817	0.755114	15.4063	4.59765	-0.116989	0.000445195	0.0046338	0.221566	-0.019083	0.462214	15.4063	1.98008	-5.01469	0.0682868	0.144542	-0.0645643	-0.305213	0.176084	15.4063	-0.576995	-6.74183	0.573366	0.72507	0.431352	0.190704	0.672001	15.4063
4040	sp|Q14166|TTL12_HUMAN Tubulin--tyrosine ligase-like protein 12 OS=Homo sapiens OX=9606 GN=TTLL12 PE=1 SV=2	Q14166	54.169	Q14166	TTLL12	Tubulin--tyrosine ligase-like protein 12	19.6671	20.3901	20.2415	19.9043	19.0391	19.7345	20.1207	20.3236	19.7965	18.9392	19.6811	20.1154	20.2136	19.6228	19.6654	0.51446	0.192864	0.836055	19.8303	3.44036	-2.3371	0.00413118	0.0183896	0.565334	0.243738	0.886929	19.8303	3.78057	-1.68176	0.00212384	0.01304	0.0802874	-0.241308	0.401883	19.8303	0.536909	-6.76503	0.600001	0.745871	-0.479694	-0.801289	-0.158098	19.8303
5162	sp|Q92973|TNPO1_HUMAN Transportin-1 OS=Homo sapiens OX=9606 GN=TNPO1 PE=1 SV=2;tr|A0A7P0TBF0|A0A7P0TBF0_HUMAN Transportin-1 OS=Homo sapiens OX=9606 GN=TNPO1 PE=4 SV=1;tr|A0A7P0Z4D3|A0A7P0Z4D3_HUMAN Transportin-1 OS=Homo sapiens OX=9606 GN=TNPO1 PE=4 SV=1;t	Q92973;A0A7P0TBF0;A0A7P0Z4D3;A0A7P0T944;A0A7P0T9C0	46.027	Q92973	TNPO1	Transportin-1	21.3874	21.96	21.6617	21.4094	20.9631	21.316	21.8096	21.5711	21.2788	20.8269	21.3519	21.8267	21.4772	21.1392	21.1062	0.513668	0.325398	0.701938	21.4057	5.86764	2.16987	4.59183e-05	0.00120106	0.218265	0.029995	0.406535	21.4057	2.49325	-4.12957	0.0262231	0.0723095	-0.0759647	-0.264235	0.112305	21.4057	-0.867747	-6.52717	0.400578	0.583009	-0.386394	-0.574664	-0.198124	21.4057
6511	sp|Q9Y6G9|DC1L1_HUMAN Cytoplasmic dynein 1 light intermediate chain 1 OS=Homo sapiens OX=9606 GN=DYNC1LI1 PE=1 SV=3;tr|E9PHI6|E9PHI6_HUMAN Dynein light intermediate chain OS=Homo sapiens OX=9606 GN=DYNC1LI1 PE=1 SV=1	Q9Y6G9;E9PHI6	31.655	Q9Y6G9	DYNC1LI1	Cytoplasmic dynein 1 light intermediate chain 1	19.417	20.0202	19.701	19.5295	19.1898	19.3785	19.8953	19.7416	19.3796	19.0925	19.3982	19.818	19.5305	19.1585	19.3842	0.513255	0.296019	0.730491	19.509	5.08118	0.778063	0.000182812	0.00269107	0.259774	0.0425381	0.47701	19.509	2.57174	-3.98693	0.0225567	0.0654745	-0.0420415	-0.259277	0.175194	19.509	-0.416208	-6.82515	0.683748	0.805587	-0.175731	-0.392967	0.0415045	19.509
3558	sp|P55263|ADK_HUMAN Adenosine kinase OS=Homo sapiens OX=9606 GN=ADK PE=1 SV=2;tr|A0A5K1VW54|A0A5K1VW54_HUMAN Adenosine kinase OS=Homo sapiens OX=9606 GN=ADK PE=1 SV=1;tr|A0A5K1VW94|A0A5K1VW94_HUMAN Adenosine kinase OS=Homo sapiens OX=9606 GN=ADK PE=1 SV=1;	P55263;A0A5K1VW54;A0A5K1VW94;A0A5F9ZH72;A0A5F9ZHJ1;A0A5F9ZH31	26.073	P55263	ADK	Adenosine kinase	20.4859	21.237	21.1413	20.6479	19.8219	20.6411	21.0409	21.0539	20.572	19.6603	20.5766	20.9627	21.106	20.4593	20.4065	0.512369	0.200239	0.824498	20.6542	3.53029	-2.1631	0.00346327	0.0165644	0.532578	0.220449	0.844708	20.6542	3.66954	-1.89666	0.00263734	0.0150871	-0.00812527	-0.320255	0.304004	20.6542	-0.0559843	-6.91499	0.956168	0.977983	-0.604935	-0.917064	-0.292805	20.6542
4102	sp|Q14C86|GAPD1_HUMAN GTPase-activating protein and VPS9 domain-containing protein 1 OS=Homo sapiens OX=9606 GN=GAPVD1 PE=1 SV=2;tr|F8W9S7|F8W9S7_HUMAN GTPase-activating protein and VPS9 domain-containing protein 1 OS=Homo sapiens OX=9606 GN=GAPVD1 PE=1 SV	Q14C86;F8W9S7;C9IZ08;H0Y4E7;H0Y7I9;B4DGD8	63.241	Q14C86	GAPVD1	GTPase-activating protein and VPS9 domain-containing protein 1	20.0485	20.6984	20.6321	20.1866	19.5653	20.0528	20.5537	20.4807	20.0839	19.3633	20.0906	20.4749	20.4262	19.8342	19.8516	0.511761	0.258332	0.765189	20.1562	4.34285	-0.598662	0.000719641	0.00611647	0.449078	0.19565	0.702507	20.1562	3.81092	-1.62308	0.00200207	0.0125836	-0.0290374	-0.282466	0.224391	20.1562	-0.246414	-6.88445	0.80904	0.888911	-0.470555	-0.723983	-0.217126	20.1562
82	tr|A0A087WW40|A0A087WW40_HUMAN Endophilin-B1 OS=Homo sapiens OX=9606 GN=SH3GLB1 PE=1 SV=1;sp|Q9Y371|SHLB1_HUMAN Endophilin-B1 OS=Homo sapiens OX=9606 GN=SH3GLB1 PE=1 SV=1	A0A087WW40;Q9Y371	25.354	A0A087WW40	SH3GLB1	Endophilin-B1	20.4169	21.1067	20.8654	20.4501	19.7708	20.3971	20.8684	20.8453	20.2166	19.5	20.4364	20.8092	20.5822	19.9815	19.7499	0.511309	0.249129	0.773489	20.3998	4.19417	-0.882319	0.000955429	0.00723814	0.347501	0.0853206	0.609681	20.3998	2.85049	-3.46951	0.0131384	0.0452662	-0.200761	-0.462941	0.0614191	20.3998	-1.64681	-5.60329	0.122488	0.270562	-0.74326	-1.00544	-0.48108	20.3998
6492	sp|Q9Y613|FHOD1_HUMAN FH1/FH2 domain-containing protein 1 OS=Homo sapiens OX=9606 GN=FHOD1 PE=1 SV=3	Q9Y613	19.368	Q9Y613	FHOD1	FH1/FH2 domain-containing protein 1	20.0388	20.5566	20.1112	19.4653	18.3029	19.8706	20.3818	19.8777	18.5693	18.217	19.9484	20.4517	19.7757	18.4456	18.0803	0.510765	0.0900468	0.931483	19.4729	2.61091	-3.91176	0.020917	0.05464	-0.0310707	-0.451789	0.389648	19.4729	-0.158827	-6.82698	0.876139	0.913931	-1.12589	-1.54661	-0.705171	19.4729	-5.75529	1.92522	5.5647e-05	0.00119975	-1.75248	-2.1732	-1.33177	19.4729
3454	sp|P50748|KNTC1_HUMAN Kinetochore-associated protein 1 OS=Homo sapiens OX=9606 GN=KNTC1 PE=1 SV=1;tr|E7ES84|E7ES84_HUMAN Kinetochore-associated protein 1 OS=Homo sapiens OX=9606 GN=KNTC1 PE=1 SV=1	P50748;E7ES84	13.945	P50748	KNTC1	Kinetochore-associated protein 1	17.956	18.5649	18.4354	18.0246	17.6244	17.8244	18.3589	18.2556	17.9224	17.6258	18.0063	18.3943	18.3341	18.0018	18.1612	0.510493	0.248318	0.772668	18.0994	4.18757	-0.894964	0.000967587	0.00728954	0.412803	0.150628	0.674978	18.0994	3.38622	-2.44499	0.00459444	0.0219393	0.0540553	-0.20812	0.31623	18.0994	0.443415	-6.81289	0.664435	0.793017	-0.125083	-0.387258	0.137092	18.0994
2444	sp|O43847|NRDC_HUMAN Nardilysin OS=Homo sapiens OX=9606 GN=NRDC PE=1 SV=3;tr|G3V1R5|G3V1R5_HUMAN Nardilysin OS=Homo sapiens OX=9606 GN=NRDC PE=1 SV=1;tr|F5H7V1|F5H7V1_HUMAN Nardilysin OS=Homo sapiens OX=9606 GN=NRDC PE=1 SV=2	O43847;G3V1R5;F5H7V1	58.776	O43847	NRDC	Nardilysin	20.9582	21.62	21.4503	20.9723	20.677	20.8785	21.416	21.3347	20.8846	20.4376	21.0118	21.3437	21.2111	20.7017	21.0588	0.510384	0.224428	0.796341	21.0638	3.83849	-1.5667	0.00189758	0.0112228	0.382535	0.0965781	0.668491	21.0638	2.87696	-3.41964	0.0124766	0.0436237	-0.0966766	-0.382633	0.18928	21.0638	-0.727084	-6.64101	0.479498	0.649603	-0.22505	-0.511007	0.0609061	21.0638
1141	tr|B7Z7P8|B7Z7P8_HUMAN Eukaryotic peptide chain release factor subunit 1 OS=Homo sapiens OX=9606 GN=ETF1 PE=1 SV=1;sp|P62495|ERF1_HUMAN Eukaryotic peptide chain release factor subunit 1 OS=Homo sapiens OX=9606 GN=ETF1 PE=1 SV=3;tr|I3L492|I3L492_HUMAN Eukar	B7Z7P8;P62495;I3L492	50.969	B7Z7P8	ETF1	Eukaryotic peptide chain release factor subunit 1	21.0942	21.6782	21.5886	21.2105	20.6128	21.0871	21.6172	21.4528	21.2248	20.2929	21.1279	21.5449	21.4378	20.9749	21.0517	0.510377	0.208892	0.811862	21.1997	3.64073	-1.9493	0.00279006	0.0144403	0.39002	0.0885345	0.691505	21.1997	2.78217	-3.59769	0.0150093	0.0494639	0.0336803	-0.267805	0.335165	21.1997	0.240255	-6.88603	0.813714	0.891738	-0.450578	-0.752063	-0.149093	21.1997
2885	sp|P09972|ALDOC_HUMAN Fructose-bisphosphate aldolase C OS=Homo sapiens OX=9606 GN=ALDOC PE=1 SV=2;tr|A8MVZ9|A8MVZ9_HUMAN Fructose-bisphosphate aldolase OS=Homo sapiens OX=9606 GN=ALDOC PE=1 SV=1	P09972;A8MVZ9	54.882	P09972	ALDOC	Fructose-bisphosphate aldolase C	22.4638	23.2176	23.0839	22.6015	21.5686	22.4958	22.8693	22.9712	22.192	21.1501	22.495	22.8979	22.8093	22.1868	21.948	0.510088	0.143467	0.876709	22.4634	2.9922	-3.19804	0.00995832	0.0325101	0.469942	0.103321	0.836563	22.4634	2.7567	-3.64526	0.0157714	0.0511546	-0.158061	-0.524682	0.20856	22.4634	-0.927195	-6.47365	0.369981	0.555572	-0.929331	-1.29595	-0.56271	22.4634
5826	sp|Q9HAB8|PPCS_HUMAN Phosphopantothenate--cysteine ligase OS=Homo sapiens OX=9606 GN=PPCS PE=1 SV=2	Q9HAB8	6.2774	Q9HAB8	PPCS	Phosphopantothenate--cysteine ligase	17.4643	18.1491	18.048	17.6219	16.8172	17.354	17.852	17.9753	17.4807	16.6738	17.4415	17.7855	17.9642	17.3496	17.2495	0.508913	0.22713	0.790697	17.5484	3.88411	-1.47858	0.00173673	0.0106104	0.575891	0.294108	0.857675	17.5484	4.3953	-0.501901	0.000651526	0.00622861	0.0641381	-0.217645	0.345921	17.5484	0.489512	-6.79039	0.632276	0.769171	-0.506405	-0.788188	-0.224621	17.5484
6484	sp|Q9Y5X3|SNX5_HUMAN Sorting nexin-5 OS=Homo sapiens OX=9606 GN=SNX5 PE=1 SV=1;tr|A0A087WUY5|A0A087WUY5_HUMAN Sorting nexin-5 (Fragment) OS=Homo sapiens OX=9606 GN=SNX5 PE=1 SV=1;tr|Q5QPE5|Q5QPE5_HUMAN Sorting nexin-5 (Fragment) OS=Homo sapiens OX=9606 GN=	Q9Y5X3;A0A087WUY5;Q5QPE5	41.298	Q9Y5X3	SNX5	Sorting nexin-5	20.0907	20.7556	20.6568	20.2781	19.5687	20.1116	20.5953	20.5573	20.0256	19.388	20.1231	20.5004	20.5421	20.1309	20.2535	0.508663	0.159361	0.857965	20.2385	3.13178	-2.93157	0.00757315	0.0272632	0.476958	0.127656	0.82626	20.2385	2.93658	-3.30695	0.0111041	0.0401474	0.0364078	-0.312894	0.38571	20.2385	0.224159	-6.88999	0.825964	0.898205	-0.371718	-0.72102	-0.0224156	20.2385
2317	sp|O14933|UB2L6_HUMAN Ubiquitin/ISG15-conjugating enzyme E2 L6 OS=Homo sapiens OX=9606 GN=UBE2L6 PE=1 SV=4;tr|E9PQT7|E9PQT7_HUMAN Ubiquitin/ISG15-conjugating enzyme E2 L6 (Fragment) OS=Homo sapiens OX=9606 GN=UBE2L6 PE=1 SV=1	O14933;E9PQT7	29.398	O14933	UBE2L6	Ubiquitin/ISG15-conjugating enzyme E2 L6	17.9711	18.5818	18.2451	17.5278	16.4497	17.7892	18.2957	17.9992	16.9996	15.8926	17.8664	18.275	17.8269	16.2995	16.3825	0.508616	-0.00315658	1.02039	17.4935	2.13735	-4.75008	0.0512403	0.104017	0.148174	-0.363599	0.659946	17.4935	0.622669	-6.63749	0.543797	0.654881	-0.933246	-1.44502	-0.421473	17.4935	-3.92177	-1.47229	0.00161447	0.0123211	-1.63396	-2.14573	-1.12218	17.4935
1986	tr|H7BZT7|H7BZT7_HUMAN S-formylglutathione hydrolase (Fragment) OS=Homo sapiens OX=9606 GN=ESD PE=1 SV=1;tr|X6RA14|X6RA14_HUMAN S-formylglutathione hydrolase OS=Homo sapiens OX=9606 GN=ESD PE=1 SV=1;tr|U3KQT1|U3KQT1_HUMAN S-formylglutathione hydrolase OS=H	H7BZT7;X6RA14;U3KQT1;P10768	12.682	H7BZT7	ESD	S-formylglutathione hydrolase (Fragment)	20.1026	20.8647	20.6372	20.2125	19.4734	20.0286	20.5065	20.5446	20.0336	19.2853	19.9985	20.2813	20.4111	20.0106	19.6351	0.507585	0.230732	0.784438	20.135	3.94296	-1.36502	0.00154955	0.00986577	0.487724	0.210871	0.764577	20.135	3.78868	-1.66608	0.00209059	0.0129105	0.0423063	-0.234547	0.319159	20.135	0.328639	-6.85947	0.747432	0.848349	-0.578675	-0.855528	-0.301822	20.135
4687	tr|Q7Z674|Q7Z674_HUMAN Fasciculation and elongation protein zeta 2 (Zygin II), isoform CRA_d OS=Homo sapiens OX=9606 GN=FEZ2 PE=1 SV=1;sp|Q9UHY8|FEZ2_HUMAN Fasciculation and elongation protein zeta-2 OS=Homo sapiens OX=9606 GN=FEZ2 PE=1 SV=2;tr|H7C0W1|H7C0	Q7Z674;Q9UHY8;H7C0W1;H7C0L4;H7C434;F8W6C0;G3V0F5	7.1766	Q7Z674	FEZ2	Fasciculation and elongation protein zeta 2 (Zygin II), isoform CRA_d	15.8618	16.5125	16.3671	15.9861	15.6664	15.8899	16.346	16.2237	16.0107	15.439	15.8265	16.2409	16.1241	15.6639	15.656	0.507092	0.281284	0.7329	15.9876	4.82958	0.315709	0.000289436	0.00359873	0.378928	0.15312	0.604736	15.9876	3.60894	-2.014	0.00296901	0.0163952	0.0274681	-0.19834	0.253276	15.9876	0.261609	-6.88036	0.797542	0.880991	-0.27227	-0.498079	-0.046462	15.9876
2685	sp|O95373|IPO7_HUMAN Importin-7 OS=Homo sapiens OX=9606 GN=IPO7 PE=1 SV=1	O95373	75.223	O95373	IPO7	Importin-7	20.5979	21.2653	21.1356	20.6891	20.3412	20.8137	21.1879	21.0281	20.8017	20.1553	20.7515	21.2306	20.9238	20.5281	20.6549	0.506899	0.26265	0.751148	20.807	4.46325	-0.370292	0.00057302	0.0053803	0.308141	0.0638915	0.55239	20.807	2.71318	-3.72629	0.0171624	0.0540152	-0.0480625	-0.292312	0.196187	20.807	-0.423191	-6.82208	0.678768	0.801528	-0.337242	-0.581491	-0.0929932	20.807
3401	sp|P49247|RPIA_HUMAN Ribose-5-phosphate isomerase OS=Homo sapiens OX=9606 GN=RPIA PE=1 SV=3	P49247	3.6941	P49247	RPIA	Ribose-5-phosphate isomerase	15.3914	16.0403	15.5993	15.281	15.0621	15.3211	15.7438	15.5967	15.1093	14.9963	15.2815	15.7238	15.506	15.3642	15.7678	0.504598	0.160645	0.848552	15.4523	3.15507	-2.88693	0.00723467	0.0265146	0.23597	-0.107983	0.579924	15.4523	1.47544	-5.76956	0.162858	0.272514	-0.0798779	-0.423832	0.264076	15.4523	-0.499447	-6.78526	0.625443	0.76451	-0.0559788	-0.399932	0.287975	15.4523
5282	sp|Q96G03|PGM2_HUMAN Phosphoglucomutase-2 OS=Homo sapiens OX=9606 GN=PGM2 PE=1 SV=4;tr|E7ENQ8|E7ENQ8_HUMAN Phosphoglucomutase-2 OS=Homo sapiens OX=9606 GN=PGM2 PE=1 SV=1	Q96G03;E7ENQ8	26.531	Q96G03	PGM2	Phosphoglucomutase-2	17.838	18.4549	18.448	17.925	17.5137	17.8525	18.3355	18.3206	17.9759	17.1767	17.8317	18.2447	18.3988	17.779	17.518	0.504301	0.304567	0.704036	17.9742	5.43	1.40578	9.80273e-05	0.00179839	0.548415	0.348681	0.74815	17.9742	5.905	2.23162	4.30933e-05	0.00112912	0.0525607	-0.147174	0.252295	17.9742	0.565941	-6.74839	0.580648	0.730804	-0.437947	-0.637681	-0.238212	17.9742
4103	sp|Q14CX7|NAA25_HUMAN N-alpha-acetyltransferase 25, NatB auxiliary subunit OS=Homo sapiens OX=9606 GN=NAA25 PE=1 SV=1	Q14CX7	29.776	Q14CX7	NAA25	N-alpha-acetyltransferase 25, NatB auxiliary subunit	19.1287	19.7077	19.4771	19.1453	18.6078	19.147	19.6002	19.3887	19.1363	18.3951	19.1802	19.6602	19.4578	19.2537	19.0614	0.504046	0.243564	0.764529	19.2231	4.16155	-0.944795	0.00101704	0.00752845	0.289233	0.0287507	0.549716	19.2231	2.38799	-4.31829	0.0320465	0.0839325	0.0264588	-0.234024	0.286941	19.2231	0.218451	-6.89133	0.83032	0.90094	-0.463868	-0.724351	-0.203386	19.2231
6139	sp|Q9UBB4|ATX10_HUMAN Ataxin-10 OS=Homo sapiens OX=9606 GN=ATXN10 PE=1 SV=1;tr|A0A1W2PQD2|A0A1W2PQD2_HUMAN Ataxin-10 OS=Homo sapiens OX=9606 GN=ATXN10 PE=1 SV=1;tr|B1AHE4|B1AHE4_HUMAN Ataxin-10 (Fragment) OS=Homo sapiens OX=9606 GN=ATXN10 PE=1 SV=1	Q9UBB4;A0A1W2PQD2;B1AHE4	25.119	Q9UBB4	ATXN10	Ataxin-10	19.6514	20.3062	20.0739	19.5297	19.5022	19.7459	20.1845	19.9869	19.4306	19.3648	19.7369	20.1553	19.9389	19.3493	20.1109	0.503936	0.200196	0.807675	19.8045	3.5681	-2.08992	0.00321608	0.0157127	0.288508	-0.0152313	0.592248	19.8045	2.04277	-4.91186	0.0609468	0.132712	-0.274875	-0.578614	0.0288649	19.8045	-1.94624	-5.14254	0.0725761	0.189352	-0.052099	-0.355838	0.251641	19.8045
620	tr|A0A3B3ISP1|A0A3B3ISP1_HUMAN Ankyrin repeat and SAM domain-containing protein 1A OS=Homo sapiens OX=9606 GN=ANKS1A PE=1 SV=1;sp|Q92625|ANS1A_HUMAN Ankyrin repeat and SAM domain-containing protein 1A OS=Homo sapiens OX=9606 GN=ANKS1A PE=1 SV=4	A0A3B3ISP1;Q92625	12.979	A0A3B3ISP1	ANKS1A	Ankyrin repeat and SAM domain-containing protein 1A	17.6541	18.2419	18.3031	17.9623	17.0482	17.6393	18.12	18.1757	17.8158	16.8121	17.6034	18.0463	18.06	17.512	17.2099	0.50383	0.250248	0.757413	17.747	4.27295	-0.731808	0.000821983	0.00668063	0.54736	0.293778	0.800943	17.747	4.64212	-0.0363477	0.000409709	0.00465886	0.131096	-0.122487	0.384679	17.747	1.11182	-6.28798	0.285476	0.473759	-0.608864	-0.862446	-0.355281	17.747
1533	tr|E9PJI2|E9PJI2_HUMAN Protein mono-ADP-ribosyltransferase PARP10 (Fragment) OS=Homo sapiens OX=9606 GN=PARP10 PE=1 SV=1;tr|E9PPV8|E9PPV8_HUMAN Protein mono-ADP-ribosyltransferase PARP10 (Fragment) OS=Homo sapiens OX=9606 GN=PARP10 PE=1 SV=1;tr|F8W8G7|F8W8	E9PJI2;E9PPV8;F8W8G7;E9PPE7;E9PK67;E9PNI7;Q53GL7	8.1864	E9PJI2	PARP10	Protein mono-ADP-ribosyltransferase PARP10 (Fragment)	13.4911	14.0476	13.9274	13.3073	11.5212	13.4654	13.9313	13.7062	12.9291	11.4244	13.3813	13.8682	13.4781	12.0709	11.645	0.50307	0.0272447	0.978896	13.0796	2.27376	-4.51585	0.0397526	0.0862458	0.25798	-0.217845	0.733806	13.0796	1.16601	-6.15299	0.263643	0.382808	-0.676872	-1.1527	-0.201046	13.0796	-3.0593	-3.1419	0.00873095	0.0421389	-1.91574	-2.39157	-1.43992	13.0796
3789	sp|Q01581|HMCS1_HUMAN Hydroxymethylglutaryl-CoA synthase, cytoplasmic OS=Homo sapiens OX=9606 GN=HMGCS1 PE=1 SV=2	Q01581	34.025	Q01581	HMGCS1	Hydroxymethylglutaryl-CoA synthase, cytoplasmic	21.7706	22.4887	22.0074	21.7613	21.1216	21.7693	22.2261	22.1772	21.3906	20.6738	21.8021	22.1359	21.7591	21.3753	22.0743	0.502943	-0.0445683	1.05045	21.7689	1.97555	-5.01848	0.0688465	0.129175	0.200592	-0.346919	0.748104	21.7689	0.787924	-6.51825	0.444251	0.566276	-0.271554	-0.819065	0.275957	21.7689	-1.06666	-6.33603	0.304687	0.49142	-0.490754	-1.03827	0.0567572	21.7689
3221	sp|P32121|ARRB2_HUMAN Beta-arrestin-2 OS=Homo sapiens OX=9606 GN=ARRB2 PE=1 SV=2;tr|I3L412|I3L412_HUMAN Beta-arrestin-2 (Fragment) OS=Homo sapiens OX=9606 GN=ARRB2 PE=1 SV=1;tr|K7ENA6|K7ENA6_HUMAN Beta-arrestin-2 OS=Homo sapiens OX=9606 GN=ARRB2 PE=1 SV=1	P32121;I3L412;K7ENA6	3.3007	P32121	ARRB2	Beta-arrestin-2	16.8171	17.2172	17.1339	17.2487	17.3243	16.7943	17.2982	17.2405	17.175	17.334	16.6704	17.275	16.9828	17.1496	17.2189	0.502882	0.344503	0.661261	17.1253	6.82858	3.75121	9.53204e-06	0.000514043	0.358451	0.200072	0.516831	17.1253	4.86738	0.382957	0.000269995	0.00356651	0.43049	0.272111	0.58887	17.1253	5.84559	2.08184	4.76773e-05	0.00108601	0.531813	0.373434	0.690193	17.1253
5992	sp|Q9NVG8|TBC13_HUMAN TBC1 domain family member 13 OS=Homo sapiens OX=9606 GN=TBC1D13 PE=1 SV=3	Q9NVG8	6.0964	Q9NVG8	TBC1D13	TBC1 domain family member 13	13.5605	14.38	13.9168	13.4699	13.2991	13.7036	13.9535	13.9474	13.6476	12.9982	13.5328	13.9717	14.0761	13.2853	13.6788	0.50275	0.168328	0.837172	13.6947	3.23311	-2.73702	0.00620649	0.0238302	0.38112	0.046698	0.715542	13.6947	2.45092	-4.20583	0.0284314	0.0769	-0.131374	-0.465796	0.203048	13.6947	-0.844848	-6.54694	0.412805	0.593209	-0.273585	-0.608007	0.0608367	13.6947
5219	sp|Q96BN8|OTUL_HUMAN Ubiquitin thioesterase otulin OS=Homo sapiens OX=9606 GN=OTULIN PE=1 SV=3	Q96BN8	9.8921	Q96BN8	OTULIN	Ubiquitin thioesterase otulin	18.2829	19.0479	18.8709	18.5151	17.8212	18.4553	18.8708	18.8349	18.3137	17.7629	18.4881	18.8135	18.8008	18.2565	18.1612	0.501995	0.271773	0.732218	18.4864	4.68937	0.054826	0.0003752	0.00418305	0.426769	0.196546	0.656991	18.4864	3.98664	-1.28386	0.00142404	0.0101419	-0.0469939	-0.277216	0.183229	18.4864	-0.438992	-6.81494	0.667558	0.794331	-0.49366	-0.723882	-0.263437	18.4864
6385	sp|Q9Y2S6|TMA7_HUMAN Translation machinery-associated protein 7 OS=Homo sapiens OX=9606 GN=TMA7 PE=1 SV=1;tr|A0A024R1R8|A0A024R1R8_HUMAN Coiled-coil domain-containing protein 72 OS=Homo sapiens OX=9606 GN=hCG_2014768 PE=3 SV=1	Q9Y2S6;A0A024R1R8	3.2774	Q9Y2S6	TMA7	Translation machinery-associated protein 7	16.9559	17.5083	17.2133	17.026	17.1191	16.9449	17.5487	17.2289	16.9189	17.0619	16.8986	17.2481	17.0802	17.1646	17.3367	0.501889	0.295151	0.708627	17.1503	5.22097	1.03152	0.000142132	0.00228835	0.241004	0.0342667	0.447742	17.1503	2.50708	-4.10455	0.025538	0.0712256	0.10333	-0.103408	0.310068	17.1503	1.07491	-6.32738	0.301109	0.488496	0.239419	0.0326809	0.446157	17.1503
2583	sp|O75663|TIPRL_HUMAN TIP41-like protein OS=Homo sapiens OX=9606 GN=TIPRL PE=1 SV=2	O75663	4.1336	O75663	TIPRL	TIP41-like protein	18.0516	18.6089	18.66	18.0368	17.8865	18.0577	18.6289	18.3742	18.0685	17.4523	18.026	18.4031	18.3457	17.8375	17.8349	0.501861	0.248217	0.755505	18.1515	4.25522	-0.765635	0.00085024	0.00679968	0.414846	0.161203	0.66849	18.1515	3.51743	-2.19117	0.00355165	0.0185031	-0.064151	-0.317795	0.189493	18.1515	-0.543929	-6.76108	0.595291	0.742335	-0.320528	-0.574172	-0.0668844	18.1515
3415	sp|P49662|CASP4_HUMAN Caspase-4 OS=Homo sapiens OX=9606 GN=CASP4 PE=1 SV=1;tr|E9PMT1|E9PMT1_HUMAN Caspase-4 (Fragment) OS=Homo sapiens OX=9606 GN=CASP4 PE=1 SV=1	P49662;E9PMT1	25.863	P49662	CASP4	Caspase-4	19.5018	20.2054	19.5955	19.2096	18.7005	19.4115	19.8241	19.5215	19.0041	18.4573	19.4569	19.8459	19.3021	18.7463	18.8488	0.501744	0.209848	0.793641	19.3088	3.69672	-1.84091	0.00250102	0.0134132	0.0163182	-0.275578	0.308215	19.3088	0.120228	-6.83269	0.90606	0.93565	-0.470059	-0.761956	-0.178163	19.3088	-3.46327	-2.36216	0.00394959	0.0236752	-0.787874	-1.07977	-0.495977	19.3088
24	tr|A0A075B785|A0A075B785_HUMAN RAB11-binding protein RELCH OS=Homo sapiens OX=9606 GN=RELCH PE=1 SV=7;tr|A0A2R8Y566|A0A2R8Y566_HUMAN RAB11-binding protein RELCH OS=Homo sapiens OX=9606 GN=RELCH PE=1 SV=1;sp|Q9P260|RELCH_HUMAN RAB11-binding protein RELCH OS	A0A075B785;A0A2R8Y566;Q9P260	3.3979	A0A075B785	RELCH	RAB11-binding protein RELCH	15.5216	16.1221	15.9538	15.6408	15.1138	15.5377	16.0231	15.9619	15.6034	15.1142	15.5958	16.0146	15.977	15.5172	15.3161	0.50158	0.35602	0.64714	15.6675	7.41073	4.64462	3.90699e-06	0.000291302	0.412505	0.266945	0.558065	15.6675	6.09466	2.5534	3.13102e-05	0.000889965	0.0354279	-0.110132	0.180988	15.6675	0.523439	-6.77247	0.609089	0.753051	-0.370355	-0.515915	-0.224795	15.6675
5089	sp|Q8WWK9|CKAP2_HUMAN Cytoskeleton-associated protein 2 OS=Homo sapiens OX=9606 GN=CKAP2 PE=1 SV=1	Q8WWK9	1.9197	Q8WWK9	CKAP2	Cytoskeleton-associated protein 2	16.3179	16.713	16.4259	16.17	16.019	16.0993	16.5867	16.3357	16.0018	16.0726	16.1725	16.7924	16.3382	15.8905	15.9323	0.500808	0.317091	0.684525	16.2579	5.86253	2.1611	4.63197e-05	0.00120106	0.170062	-0.0136552	0.353778	16.2579	1.99077	-4.99728	0.0669807	0.142574	-0.17577	-0.359487	0.00794684	16.2579	-2.05759	-4.96001	0.0593216	0.164263	-0.188552	-0.372269	-0.00483516	16.2579
2872	tr|Q5T7C4|Q5T7C4_HUMAN High mobility group protein B1 OS=Homo sapiens OX=9606 GN=HMGB1 PE=1 SV=1;sp|P09429|HMGB1_HUMAN High mobility group protein B1 OS=Homo sapiens OX=9606 GN=HMGB1 PE=1 SV=3;sp|B2RPK0|HGB1A_HUMAN Putative high mobility group protein B1-l	Q5T7C4;P09429;B2RPK0	15.067	Q5T7C4	HMGB1	High mobility group protein B1	19.8665	20.4959	20.2796	19.669	19.7102	19.9301	20.4235	20.4018	19.4151	19.5427	19.8774	20.2561	20.0468	19.4974	19.917	0.500568	0.26287	0.738265	19.9553	4.52899	-0.246179	0.00050634	0.00493036	0.351446	0.113749	0.589144	19.9553	3.17978	-2.84279	0.00689191	0.0287366	-0.364152	-0.601849	-0.126454	19.9553	-3.29474	-2.6887	0.00549874	0.0300472	-0.16802	-0.405718	0.0696774	19.9553
5515	sp|Q9BRT9|SLD5_HUMAN DNA replication complex GINS protein SLD5 OS=Homo sapiens OX=9606 GN=GINS4 PE=1 SV=1;tr|E5RFF9|E5RFF9_HUMAN DNA replication complex GINS protein SLD5 OS=Homo sapiens OX=9606 GN=GINS4 PE=1 SV=1	Q9BRT9;E5RFF9	15.055	Q9BRT9	GINS4	DNA replication complex GINS protein SLD5	18.495	19.1368	18.8274	18.2415	18.1325	18.4459	18.9455	18.746	18.0985	18.0811	18.5609	18.9198	18.782	18.212	18.709	0.500081	0.222345	0.777817	18.5556	3.87232	-1.50135	0.00177693	0.0108041	0.284563	0.0068264	0.562299	18.5556	2.20348	-4.64089	0.0453303	0.107213	-0.316601	-0.594337	-0.038865	18.5556	-2.45156	-4.27588	0.0283968	0.0972948	-0.193077	-0.470813	0.0846595	18.5556
5800	sp|Q9H8M7|MINY3_HUMAN Ubiquitin carboxyl-terminal hydrolase MINDY-3 OS=Homo sapiens OX=9606 GN=MINDY3 PE=1 SV=1;tr|X6R9S5|X6R9S5_HUMAN Ubiquitin carboxyl-terminal hydrolase MINDY OS=Homo sapiens OX=9606 GN=MINDY3 PE=1 SV=1;tr|X6RC97|X6RC97_HUMAN Ubiquitin	Q9H8M7;X6R9S5;X6RC97;X6RC30	6.5669	Q9H8M7	MINDY3	Ubiquitin carboxyl-terminal hydrolase MINDY-3	15.2932	16.0484	15.6858	15.5334	14.9184	15.3739	15.8196	15.7129	15.2091	14.3891	15.3023	15.5988	15.4311	14.9675	15.2037	0.499144	0.0997418	0.898547	15.3658	2.68768	-3.77018	0.018032	0.0489935	0.286818	-0.112584	0.686221	15.3658	1.5444	-5.67508	0.145426	0.249804	-0.0864472	-0.48585	0.312955	15.3658	-0.465482	-6.80239	0.648949	0.781982	-0.486048	-0.88545	-0.0866451	15.3658
2681	sp|O95352|ATG7_HUMAN Ubiquitin-like modifier-activating enzyme ATG7 OS=Homo sapiens OX=9606 GN=ATG7 PE=1 SV=1	O95352	10.947	O95352	ATG7	Ubiquitin-like modifier-activating enzyme ATG7	16.7924	17.4915	17.3201	16.9653	16.567	16.8686	17.3085	17.1901	17.0487	16.3988	16.937	17.2949	17.6082	16.9045	16.8354	0.498943	0.246421	0.751466	17.0354	4.24927	-0.77701	0.00085996	0.00682606	0.50683	0.254307	0.759353	17.0354	4.31643	-0.651836	0.000756681	0.00682406	0.106833	-0.14569	0.359355	17.0354	0.909843	-6.48959	0.37874	0.563596	-0.265612	-0.518135	-0.0130897	17.0354
4484	sp|Q66K74|MAP1S_HUMAN Microtubule-associated protein 1S OS=Homo sapiens OX=9606 GN=MAP1S PE=1 SV=2	Q66K74	11.451	Q66K74	MAP1S	Microtubule-associated protein 1S	17.3576	17.8903	17.7868	17.3681	16.6991	17.2952	17.7746	17.7632	17.2992	16.5834	17.1397	17.6239	17.5326	16.9638	16.9506	0.49873	0.232775	0.764684	17.3352	4.03293	-1.19173	0.00130233	0.00886615	0.429993	0.164039	0.695948	17.3352	3.4771	-2.26923	0.00384391	0.0193625	-0.0538166	-0.319771	0.212138	17.3352	-0.435183	-6.81668	0.670253	0.795605	-0.519807	-0.785761	-0.253853	17.3352
247	sp|Q06830|PRDX1_HUMAN Peroxiredoxin-1 OS=Homo sapiens OX=9606 GN=PRDX1 PE=1 SV=1;tr|A0A0A0MSI0|A0A0A0MSI0_HUMAN Peroxiredoxin-1 (Fragment) OS=Homo sapiens OX=9606 GN=PRDX1 PE=1 SV=1	Q06830;A0A0A0MSI0	46.491	Q06830	PRDX1	Peroxiredoxin-1	26.0044	26.7651	26.6584	26.2599	25.691	26.0617	26.3945	26.7082	26.0899	25.4435	26.0572	26.4594	26.3686	25.9719	26.1337	0.498569	0.1681	0.829039	26.2045	3.24457	-2.71496	0.0060683	0.0234695	0.537265	0.206796	0.867735	26.2045	3.49639	-2.2319	0.00370122	0.0189282	0.0661193	-0.26435	0.396589	26.2045	0.430288	-6.8189	0.673723	0.79883	-0.285047	-0.615516	0.045423	26.2045
3211	sp|P31749|AKT1_HUMAN RAC-alpha serine/threonine-protein kinase OS=Homo sapiens OX=9606 GN=AKT1 PE=1 SV=2;tr|A0A087WY56|A0A087WY56_HUMAN RAC-alpha serine/threonine-protein kinase (Fragment) OS=Homo sapiens OX=9606 GN=AKT1 PE=1 SV=1;tr|G3V3X1|G3V3X1_HUMAN RA	P31749;A0A087WY56;G3V3X1;J3QKW1;A0A5F9ZGY0;A0A5F9ZHU3;A0A7P0T8T9;M0R0P9;A0A5K1VW74;Q9Y243;P31751	8.8273	P31749	AKT1	RAC-alpha serine/threonine-protein kinase	15.5994	16.1968	16.2925	15.7401	15.5977	15.4487	16.0673	16.1579	15.9075	15.2134	15.4164	15.6942	16.1048	15.2834	15.2845	0.497948	0.156629	0.839267	15.7336	3.13752	-2.92058	0.00748833	0.0270847	0.696872	0.355553	1.03819	15.7336	4.39092	-0.510211	0.000656949	0.00625298	0.15549	-0.185829	0.496809	15.7336	0.979724	-6.42377	0.344321	0.531253	-0.122965	-0.464284	0.218355	15.7336
2069	tr|J3KNF4|J3KNF4_HUMAN Copper chaperone for superoxide dismutase OS=Homo sapiens OX=9606 GN=CCS PE=1 SV=1;sp|O14618|CCS_HUMAN Copper chaperone for superoxide dismutase OS=Homo sapiens OX=9606 GN=CCS PE=1 SV=1;tr|E9PP76|E9PP76_HUMAN Copper chaperone for sup	J3KNF4;O14618;E9PP76	13.935	J3KNF4	CCS	Copper chaperone for superoxide dismutase	15.7114	16.4757	16.4228	16.1782	15.7505	15.7292	16.1515	16.3264	16.0703	15.6788	15.7686	16.0756	16.1122	15.9386	15.7597	0.497843	0.273013	0.722674	16.01	4.76212	0.190453	0.000327835	0.00382012	0.55072	0.32589	0.775551	16.01	5.26791	1.11357	0.000130688	0.00233078	0.325931	0.1011	0.550762	16.01	3.11769	-3.02994	0.00778562	0.03876	-0.00674973	-0.23158	0.218081	16.01
6325	sp|Q9UPN7|PP6R1_HUMAN Serine/threonine-protein phosphatase 6 regulatory subunit 1 OS=Homo sapiens OX=9606 GN=PPP6R1 PE=1 SV=5	Q9UPN7	3.0293	Q9UPN7	PPP6R1	Serine/threonine-protein phosphatase 6 regulatory subunit 1	15.1494	15.6929	15.7909	15.291	14.8739	15.3252	15.8383	15.6937	15.4424	14.863	15.1737	15.6105	15.5109	14.9783	15.1407	0.497766	0.239439	0.756093	15.3583	4.14399	-0.978446	0.00105186	0.00772338	0.449053	0.190726	0.70738	15.3583	3.73844	-1.76328	0.00230553	0.0138615	0.0211333	-0.237194	0.27946	15.3583	0.175938	-6.90022	0.862934	0.923615	-0.256919	-0.515246	0.00140752	15.3583
5906	sp|Q9NQP4|PFD4_HUMAN Prefoldin subunit 4 OS=Homo sapiens OX=9606 GN=PFDN4 PE=1 SV=1;tr|E9PQY2|E9PQY2_HUMAN Prefoldin subunit 4 OS=Homo sapiens OX=9606 GN=PFDN4 PE=1 SV=1	Q9NQP4;E9PQY2	11.793	Q9NQP4	PFDN4	Prefoldin subunit 4	19.5953	20.2934	19.8915	19.7342	19.0575	19.6274	20.0183	20.0876	19.3858	18.9121	19.5555	19.9577	19.9162	19.4373	19.5722	0.497063	0.178242	0.815885	19.6695	3.35295	-2.506	0.00490454	0.0203482	0.372376	0.053555	0.691197	19.6695	2.51187	-4.09587	0.0253046	0.0709754	-0.0736448	-0.392466	0.245176	19.6695	-0.496773	-6.78665	0.627279	0.765961	-0.412148	-0.730969	-0.0933271	19.6695
2787	sp|P04179|SODM_HUMAN Superoxide dismutase [Mn], mitochondrial OS=Homo sapiens OX=9606 GN=SOD2 PE=1 SV=3;tr|F5H3C5|F5H3C5_HUMAN Superoxide dismutase (Fragment) OS=Homo sapiens OX=9606 GN=SOD2 PE=1 SV=1;tr|F5H4R2|F5H4R2_HUMAN Superoxide dismutase (Fragment)	P04179;F5H3C5;F5H4R2;F5GYZ5;G8JLJ2	22.267	P04179	SOD2	Superoxide dismutase [Mn], mitochondrial	22.347	22.8278	22.3355	22.4615	22.095	22.3817	22.8476	22.3131	22.4455	21.9722	22.3752	22.9184	22.3851	22.4578	22.1132	0.496654	0.372871	0.620436	22.4184	8.62894	6.36436	6.92929e-07	0.00011028	-0.0234156	-0.147198	0.100367	22.4184	-0.406827	-6.75305	0.690462	0.776434	0.087	-0.0367825	0.210782	22.4184	1.51155	-5.79482	0.153521	0.31224	-0.307791	-0.431574	-0.184009	22.4184
3448	sp|P50502|F10A1_HUMAN Hsc70-interacting protein OS=Homo sapiens OX=9606 GN=ST13 PE=1 SV=2;sp|Q8NFI4|F10A5_HUMAN Putative protein FAM10A5 OS=Homo sapiens OX=9606 GN=ST13P5 PE=5 SV=1;tr|Q3KNR6|Q3KNR6_HUMAN Hsc70-interacting protein OS=Homo sapiens OX=9606 GN	P50502;Q8NFI4;Q3KNR6;H7C3I1;F6VDH7;Q8IZP2	30.666	P50502	ST13	Hsc70-interacting protein	22.1233	22.773	22.6322	22.3471	21.7842	22.1583	22.5781	22.5888	22.2214	21.7055	22.1403	22.5524	22.4847	22.107	22.2382	0.49389	0.240578	0.747201	22.2956	4.19312	-0.884332	0.000957354	0.00723814	0.427946	0.174634	0.681258	22.2956	3.63326	-1.9669	0.0028311	0.0158911	0.0845811	-0.168731	0.337893	22.2956	0.718093	-6.64766	0.484848	0.654205	-0.231323	-0.484635	0.021989	22.2956
1633	tr|M0R0Q7|M0R0Q7_HUMAN DNA ligase OS=Homo sapiens OX=9606 GN=LIG1 PE=1 SV=1;tr|F5GZ28|F5GZ28_HUMAN DNA ligase OS=Homo sapiens OX=9606 GN=LIG1 PE=1 SV=1;sp|P18858|DNLI1_HUMAN DNA ligase 1 OS=Homo sapiens OX=9606 GN=LIG1 PE=1 SV=1;tr|B4E135|B4E135_HUMAN DNA	M0R0Q7;F5GZ28;P18858;B4E135	34.063	M0R0Q7	LIG1	DNA ligase	18.8167	19.3444	19.1817	18.7426	18.452	18.817	19.1524	19.2957	18.533	18.5154	18.692	19.3058	19.1013	18.8265	18.8984	0.492288	0.249455	0.73512	18.9116	4.35988	-0.566275	0.000696749	0.00601262	0.417671	0.174838	0.660504	18.9116	3.69905	-1.83952	0.00248966	0.0145695	-0.07455	-0.317383	0.168283	18.9116	-0.660242	-6.6886	0.520119	0.684249	-0.153282	-0.396115	0.0895503	18.9116
2471	sp|O60343|TBCD4_HUMAN TBC1 domain family member 4 OS=Homo sapiens OX=9606 GN=TBC1D4 PE=1 SV=2;tr|A0A3B3IRT3|A0A3B3IRT3_HUMAN TBC1 domain family member 4 OS=Homo sapiens OX=9606 GN=TBC1D4 PE=1 SV=1	O60343;A0A3B3IRT3	29.495	O60343	TBC1D4	TBC1 domain family member 4	17.8551	18.4746	18.4514	18.2735	17.3492	17.8043	18.2845	18.601	18.2836	17.2762	17.8048	18.1813	18.2951	18.3398	18.1699	0.492091	0.112574	0.871607	18.0963	2.78854	-3.58238	0.0148243	0.0424456	0.627796	0.248279	1.00731	18.0963	3.55755	-2.11351	0.00328322	0.0175666	0.477569	0.0980527	0.857086	18.0963	2.70625	-3.80925	0.0173945	0.0691221	-0.222957	-0.602473	0.15656	18.0963
6164	sp|Q9UBW8|CSN7A_HUMAN COP9 signalosome complex subunit 7a OS=Homo sapiens OX=9606 GN=COPS7A PE=1 SV=1;tr|F5H4U8|F5H4U8_HUMAN COP9 signalosome complex subunit 7a (Fragment) OS=Homo sapiens OX=9606 GN=COPS7A PE=1 SV=1;tr|F5H7C6|F5H7C6_HUMAN COP9 signalosome	Q9UBW8;F5H4U8;F5H7C6;F5GYF7;F5H248	12.889	Q9UBW8	COPS7A	COP9 signalosome complex subunit 7a	16.7725	17.3027	17.2328	17.0099	17.0235	16.8604	17.2688	17.3153	17.3298	17.2565	16.7854	17.3217	17.2292	17.1231	17.2602	0.491623	0.308574	0.674672	17.1395	5.77601	2.0121	5.37029e-05	0.0012999	0.45299	0.269941	0.636039	17.1395	5.32211	1.21086	0.000118659	0.00217724	0.348198	0.165149	0.531247	17.1395	4.09093	-1.14546	0.00116471	0.00996244	0.373935	0.190886	0.556984	17.1395
1413	tr|E7EMN6|E7EMN6_HUMAN Protein phosphatase inhibitor 2 (Fragment) OS=Homo sapiens OX=9606 GN=PPP1R2 PE=1 SV=1;sp|Q6NXS1|IPP2B_HUMAN Protein phosphatase inhibitor 2 family member B OS=Homo sapiens OX=9606 GN=PPP1R2B PE=1 SV=2;sp|P41236|IPP2_HUMAN Protein ph	E7EMN6;Q6NXS1;P41236	9.9064	E7EMN6	PPP1R2	Protein phosphatase inhibitor 2 (Fragment)	17.8797	18.557	18.35	18.041	17.2669	17.8208	18.2473	18.4104	17.8027	17.1639	17.9256	18.2952	18.2362	17.9276	17.7135	0.491142	0.22032	0.761964	17.9759	3.9002	-1.44752	0.00168339	0.0103853	0.456871	0.186049	0.727692	17.9759	3.62804	-1.97701	0.00286013	0.0159881	0.0484054	-0.222417	0.319227	17.9759	0.384391	-6.83854	0.706629	0.820427	-0.49393	-0.764752	-0.223108	17.9759
4711	sp|Q86TP1|PRUN1_HUMAN Exopolyphosphatase PRUNE1 OS=Homo sapiens OX=9606 GN=PRUNE1 PE=1 SV=2	Q86TP1	5.969	Q86TP1	PRUNE1	Exopolyphosphatase PRUNE1	16.5013	17.0915	17.1605	16.7101	16.013	16.4014	16.9601	16.9632	16.6101	15.805	16.4436	16.7625	16.8887	16.479	16.6725	0.489239	0.125361	0.853117	16.6308	2.89153	-3.38879	0.0121265	0.0369188	0.555353	0.191474	0.919231	16.6308	3.28228	-2.64558	0.00563496	0.0251598	0.150944	-0.212934	0.514822	16.6308	0.892119	-6.50561	0.387834	0.57271	-0.285296	-0.649174	0.0785825	16.6308
1942	tr|H3BP07|H3BP07_HUMAN Phosphorylase b kinase gamma catalytic chain, liver/testis isoform (Fragment) OS=Homo sapiens OX=9606 GN=PHKG2 PE=1 SV=8;tr|H3BTW6|H3BTW6_HUMAN Phosphorylase b kinase gamma catalytic chain, liver/testis isoform (Fragment) OS=Homo sap	H3BP07;H3BTW6;J3KNN3;P15735;H3BN16	7.0519	H3BP07	PHKG2	Phosphorylase b kinase gamma catalytic chain, liver/testis isoform (Fragment)	16.0984	16.647	16.7394	16.7248	16.0438	16.2826	16.7343	16.8179	16.312	16.0715	16.1215	16.5878	16.3971	16.2032	16.1991	0.488863	0.209648	0.768079	16.3987	3.7654	-1.70801	0.00218753	0.0122903	0.483937	0.204722	0.763152	16.3987	3.72746	-1.78453	0.00235544	0.0140608	0.245814	-0.0334011	0.525029	16.3987	1.89335	-5.22726	0.0797735	0.201843	-0.0627034	-0.341919	0.216512	16.3987
1971	tr|H7BXK0|H7BXK0_HUMAN Putative ubiquitin carboxyl-terminal hydrolase 41 (Fragment) OS=Homo sapiens OX=9606 GN=USP41 PE=1 SV=1;sp|Q3LFD5|UBP41_HUMAN Putative ubiquitin carboxyl-terminal hydrolase 41 OS=Homo sapiens OX=9606 GN=USP41 PE=1 SV=2;sp|Q9UMW8|UBP1	H7BXK0;Q3LFD5;Q9UMW8	5.5781	H7BXK0	USP41	Putative ubiquitin carboxyl-terminal hydrolase 41 (Fragment)	17.2316	17.6477	17.2777	16.742	15.4839	17.3145	17.9412	17.0305	16.0496	14.3055	17.2004	17.6237	16.9117	15.6347	14.1643	0.48868	-0.161057	1.13842	16.5706	1.61752	-5.56802	0.128705	0.206694	-0.175524	-0.825261	0.474213	16.5706	-0.580982	-6.66342	0.570751	0.678233	-1.10673	-1.75647	-0.456995	16.5706	-3.66326	-1.9738	0.00266989	0.0181975	-2.59762	-3.24736	-1.94788	16.5706
5459	sp|Q99622|C10_HUMAN Protein C10 OS=Homo sapiens OX=9606 GN=C12orf57 PE=1 SV=1;tr|U3KQ85|U3KQ85_HUMAN Protein C10 OS=Homo sapiens OX=9606 GN=C12orf57 PE=1 SV=1;tr|F5GXW5|F5GXW5_HUMAN Protein C10 OS=Homo sapiens OX=9606 GN=C12orf57 PE=1 SV=1;tr|U3KQ07|U3KQ07	Q99622;U3KQ85;F5GXW5;U3KQ07	11.608	Q99622	C12orf57	Protein C10	16.8392	17.0874	17.0083	16.8237	16.0485	16.629	17.0356	16.9099	16.5741	16.0662	16.247	17.0582	16.8704	16.548	16.129	0.488659	0.232598	0.74472	16.6583	4.10416	-1.05484	0.00113545	0.00811661	0.35777	0.101709	0.613831	16.6583	3.00485	-3.17731	0.00971457	0.0363608	0.076837	-0.179224	0.332898	16.6583	0.645341	-6.69862	0.529438	0.6918	-0.490468	-0.746529	-0.234407	16.6583
3629	sp|P61758|PFD3_HUMAN Prefoldin subunit 3 OS=Homo sapiens OX=9606 GN=VBP1 PE=1 SV=4	P61758	15.959	P61758	VBP1	Prefoldin subunit 3	20.507	21.1413	20.9584	20.7006	20.0528	20.6227	21.0683	21.0091	20.4447	19.9532	20.6131	20.999	20.7937	20.4633	20.4957	0.488618	0.228316	0.748921	20.6549	4.03696	-1.18398	0.00129226	0.00882672	0.33949	0.0791877	0.599793	20.6549	2.80486	-3.5552	0.0143605	0.0480975	-0.0447278	-0.30503	0.215575	20.6549	-0.36954	-6.84443	0.717413	0.828161	-0.413659	-0.673962	-0.153357	20.6549
1032	tr|B1AL69|B1AL69_HUMAN Hsp90 co-chaperone Cdc37-like 1 OS=Homo sapiens OX=9606 GN=CDC37L1 PE=1 SV=1;sp|Q7L3B6|CD37L_HUMAN Hsp90 co-chaperone Cdc37-like 1 OS=Homo sapiens OX=9606 GN=CDC37L1 PE=1 SV=1	B1AL69;Q7L3B6	1.7554	B1AL69	CDC37L1	Hsp90 co-chaperone Cdc37-like 1	11.0182	12.0177	11.6587	11.5543	10.7355	11.7139	11.8714	11.4434	11.5026	10.7578	11.1518	11.4605	12.0813	10.9618	11.7275	0.488589	-0.105025	1.0822	11.4438	1.77012	-5.34206	0.0990989	0.170271	0.433176	-0.160438	1.02679	11.4438	1.56936	-5.64013	0.139519	0.242049	0.0449441	-0.54867	0.638558	11.4438	0.162829	-6.90257	0.873047	0.929524	-0.220994	-0.814608	0.37262	11.4438
201	tr|A0A0A0MQT0|A0A0A0MQT0_HUMAN Retinol binding protein 1, cellular OS=Homo sapiens OX=9606 GN=RBP1 PE=1 SV=1;sp|P09455|RET1_HUMAN Retinol-binding protein 1 OS=Homo sapiens OX=9606 GN=RBP1 PE=1 SV=2;tr|A0A0A0MTB9|A0A0A0MTB9_HUMAN Retinol-binding protein 1 O	A0A0A0MQT0;P09455;A0A0A0MTB9;H0YAK8	18.899	A0A0A0MQT0	RBP1	Retinol binding protein 1, cellular	18.3795	18.94	18.9484	18.6998	18.4386	18.2635	18.914	18.9116	19.2099	18.2534	18.3434	18.5961	18.9404	18.9137	18.3067	0.487866	0.236748	0.738983	18.6706	4.17818	-0.912943	0.000985144	0.00737815	0.60462	0.353503	0.855737	18.6706	5.17808	0.951481	0.000153501	0.00254849	0.612307	0.36119	0.863424	18.6706	5.24392	1.01703	0.000136412	0.00225558	0.0040723	-0.247045	0.25519	18.6706
4131	sp|Q15102|PA1B3_HUMAN Platelet-activating factor acetylhydrolase IB subunit alpha1 OS=Homo sapiens OX=9606 GN=PAFAH1B3 PE=1 SV=1;tr|M0R389|M0R389_HUMAN Platelet-activating factor acetylhydrolase IB subunit alpha1 (Fragment) OS=Homo sapiens OX=9606 GN=PAFAH	Q15102;M0R389;M0R1K3	27.769	Q15102	PAFAH1B3	Platelet-activating factor acetylhydrolase IB subunit alpha1	19.4417	20.1124	20.1328	19.5879	19.0565	19.3412	19.8332	20.0283	19.4791	18.7158	19.4415	19.7424	19.9317	19.3582	19.5125	0.487853	0.152904	0.822803	19.581	3.13237	-2.93045	0.00756443	0.0272632	0.622788	0.287839	0.957738	19.581	3.99875	-1.26054	0.00139113	0.00998569	0.0669663	-0.267983	0.401916	19.581	0.429972	-6.81904	0.673948	0.798948	-0.313226	-0.648175	0.0217238	19.581
5547	sp|Q9BTT0|AN32E_HUMAN Acidic leucine-rich nuclear phosphoprotein 32 family member E OS=Homo sapiens OX=9606 GN=ANP32E PE=1 SV=1;tr|E9PPH5|E9PPH5_HUMAN Acidic leucine-rich nuclear phosphoprotein 32 family member E (Fragment) OS=Homo sapiens OX=9606 GN=ANP32	Q9BTT0;E9PPH5;Q5TB19	13.614	Q9BTT0	ANP32E	Acidic leucine-rich nuclear phosphoprotein 32 family member E	19.0951	19.6785	19.5512	18.8438	18.8453	19.1369	19.6411	19.5022	18.73	18.7311	19.1175	19.4921	19.4297	18.5925	19.0585	0.48738	0.295498	0.679263	19.163	5.46256	1.46353	9.25665e-05	0.00172809	0.377838	0.185955	0.56972	19.163	4.2348	-0.807573	0.000884034	0.00757557	-0.394453	-0.586336	-0.202571	19.163	-4.42103	-0.512986	0.00062057	0.00624099	-0.238223	-0.430105	-0.0463402	19.163
4511	sp|Q6IA86|ELP2_HUMAN Elongator complex protein 2 OS=Homo sapiens OX=9606 GN=ELP2 PE=1 SV=2	Q6IA86	5.631	Q6IA86	ELP2	Elongator complex protein 2	17.3825	17.8854	17.9457	17.9014	17.5666	17.4452	17.9065	17.8089	17.9426	17.3777	17.4083	17.9053	17.8676	17.7868	17.8192	0.487085	0.290449	0.683721	17.73	5.32727	1.22258	0.000117576	0.00200131	0.46207	0.265434	0.658706	17.73	5.05368	0.725286	0.000192154	0.00293489	0.464916	0.26828	0.661552	17.73	5.0848	0.727365	0.000181619	0.00271406	0.175851	-0.0207854	0.372487	17.73
305	tr|Q5W0H4|Q5W0H4_HUMAN Translationally-controlled tumor protein OS=Homo sapiens OX=9606 GN=TPT1 PE=1 SV=1;tr|A0A0B4J2C3|A0A0B4J2C3_HUMAN Translationally-controlled tumor protein OS=Homo sapiens OX=9606 GN=TPT1 PE=1 SV=1;sp|P13693|TCTP_HUMAN Translationally	Q5W0H4;A0A0B4J2C3;P13693;J3KPG2;E9PJF7	17.732	Q5W0H4	TPT1	Translationally-controlled tumor protein	22.0802	22.6564	22.5368	21.9712	21.6007	22.077	22.5816	22.4283	21.9529	21.4193	22.1486	22.5289	22.3775	21.8042	21.9553	0.487066	0.254867	0.719265	22.1413	4.51118	-0.279756	0.00052357	0.0050121	0.345595	0.113396	0.577793	22.1413	3.20088	-2.80225	0.00661209	0.0278987	-0.192471	-0.42467	0.0397275	22.1413	-1.78266	-5.40009	0.0969567	0.229708	-0.443473	-0.675672	-0.211274	22.1413
5084	sp|Q8WVY7|UBCP1_HUMAN Ubiquitin-like domain-containing CTD phosphatase 1 OS=Homo sapiens OX=9606 GN=UBLCP1 PE=1 SV=2	Q8WVY7	4.3981	Q8WVY7	UBLCP1	Ubiquitin-like domain-containing CTD phosphatase 1	18.4907	19.0337	19.0462	18.3587	17.6315	18.3161	18.8848	18.8702	18.2446	17.4032	18.4292	18.7758	18.7798	18.1763	17.8111	0.486122	0.255704	0.716541	18.4168	4.53724	-0.230627	0.000498554	0.00489202	0.486725	0.256307	0.717143	18.4168	4.54286	-0.22285	0.000493319	0.00523163	-0.152125	-0.382543	0.0782935	18.4168	-1.41986	-5.91801	0.178153	0.344566	-0.796721	-1.02714	-0.566303	18.4168
3880	sp|Q12765|SCRN1_HUMAN Secernin-1 OS=Homo sapiens OX=9606 GN=SCRN1 PE=1 SV=2	Q12765	23.249	Q12765	SCRN1	Secernin-1	20.1228	20.7732	20.7148	20.4923	19.9559	19.9777	20.5032	20.5722	20.3536	19.6399	20.0694	20.3501	20.4414	19.9536	20.0634	0.485545	0.169358	0.801731	20.2656	3.30255	-2.60326	0.00541498	0.0217077	0.519511	0.203325	0.835697	20.2656	3.53358	-2.15992	0.00344105	0.0180968	0.209855	-0.106331	0.526041	20.2656	1.42738	-5.90812	0.176016	0.342015	-0.170233	-0.486419	0.145953	20.2656
2877	sp|P09601|HMOX1_HUMAN Heme oxygenase 1 OS=Homo sapiens OX=9606 GN=HMOX1 PE=1 SV=1;tr|B1AHA8|B1AHA8_HUMAN Heme oxygenase (biliverdin-producing) (Fragment) OS=Homo sapiens OX=9606 GN=HMOX1 PE=1 SV=1;tr|A0A7I2V3I1|A0A7I2V3I1_HUMAN Heme oxygenase OS=Homo sapie	P09601;B1AHA8;A0A7I2V3I1;A0A7I2V277	16.637	P09601	HMOX1	Heme oxygenase 1	18.4359	18.9789	19.2445	20.0707	19.0113	18.6411	19.1823	19.2772	20.8568	19.0435	18.5645	18.9366	19.2953	20.4319	18.0002	0.485419	-0.0180669	0.988905	19.198	2.07344	-4.8574	0.0576269	0.113436	0.725132	0.221646	1.22862	19.198	3.09736	-3.00077	0.00810253	0.0322027	1.90596	1.40247	2.40944	19.198	8.1412	5.67583	1.35586e-06	9.80845e-05	0.137801	-0.365685	0.641287	19.198
3189	sp|P30086|PEBP1_HUMAN Phosphatidylethanolamine-binding protein 1 OS=Homo sapiens OX=9606 GN=PEBP1 PE=1 SV=3	P30086	23.1	P30086	PEBP1	Phosphatidylethanolamine-binding protein 1	21.3295	22.0486	22.0641	21.5172	20.6032	21.2483	21.6919	21.9171	21.2186	20.3042	21.2362	21.5296	21.7016	21.2618	21.2096	0.485348	0.0763971	0.894299	21.3921	2.55238	-4.01882	0.0234123	0.059427	0.622931	0.21398	1.03188	21.3921	3.27591	-2.65786	0.00570593	0.0253713	0.0611917	-0.347759	0.470143	21.3921	0.321798	-6.86182	0.752496	0.851625	-0.565666	-0.974617	-0.156715	21.3921
1251	tr|C9JM46|C9JM46_HUMAN Glycerol-3-phosphate dehydrogenase [NAD(+)] (Fragment) OS=Homo sapiens OX=9606 GN=GPD1L PE=1 SV=1;sp|Q8N335|GPD1L_HUMAN Glycerol-3-phosphate dehydrogenase 1-like protein OS=Homo sapiens OX=9606 GN=GPD1L PE=1 SV=1	C9JM46;Q8N335	2.156	C9JM46	GPD1L	Glycerol-3-phosphate dehydrogenase [NAD(+)] (Fragment)	14.0609	14.5613	14.9437	14.6851	14.3035	14.4417	14.8786	14.8777	14.8	14.2889	14.1755	14.6937	14.6661	14.6093	14.4682	0.485141	0.244631	0.725652	14.5636	4.33808	-0.607729	0.000726185	0.00615565	0.603109	0.362599	0.843619	14.5636	5.39294	1.33739	0.000104657	0.00200102	0.472084	0.231574	0.712594	14.5636	4.22133	-0.894652	0.000907089	0.00828483	0.127459	-0.113051	0.367969	14.5636
4408	sp|Q5T4S7|UBR4_HUMAN E3 ubiquitin-protein ligase UBR4 OS=Homo sapiens OX=9606 GN=UBR4 PE=1 SV=1	Q5T4S7	220.23	Q5T4S7	UBR4	E3 ubiquitin-protein ligase UBR4	21.8054	22.3994	22.2247	21.9036	21.1366	21.7815	22.2499	22.1712	21.686	20.938	21.8504	22.2425	22.0197	21.6276	21.5536	0.484817	0.212087	0.757547	21.8393	3.82303	-1.59658	0.00195547	0.0114601	0.32609	0.0533599	0.59882	21.8393	2.57139	-3.98758	0.0225721	0.0654745	-0.0734108	-0.346141	0.199319	21.8393	-0.578881	-6.7407	0.572128	0.724089	-0.603059	-0.875789	-0.330329	21.8393
1646	tr|V9GYY3|V9GYY3_HUMAN C-1-tetrahydrofolate synthase, cytoplasmic OS=Homo sapiens OX=9606 GN=MTHFD1 PE=1 SV=2;tr|F5H2F4|F5H2F4_HUMAN C-1-tetrahydrofolate synthase, cytoplasmic OS=Homo sapiens OX=9606 GN=MTHFD1 PE=1 SV=2;sp|P11586|C1TC_HUMAN C-1-tetrahydrof	V9GYY3;F5H2F4;P11586;V9GZ78;A0A494C1T2	127.93	V9GYY3	MTHFD1	C-1-tetrahydrofolate synthase, cytoplasmic	23.8149	24.4201	24.3894	24.0373	23.9705	23.7813	24.2417	24.3639	23.8022	23.8078	23.8315	24.2136	24.2591	23.6025	23.8954	0.482567	0.274148	0.690986	24.0287	4.97948	0.592089	0.000219909	0.00303675	0.528213	0.319794	0.736631	24.0287	5.45048	1.4397	9.4554e-05	0.00186963	0.00472906	-0.20369	0.213148	24.0287	0.0487979	-6.91539	0.961789	0.980896	0.0819591	-0.12646	0.290378	24.0287
528	tr|A0A2R8Y4Z8|A0A2R8Y4Z8_HUMAN Coiled-coil domain-containing protein 9 OS=Homo sapiens OX=9606 GN=CCDC9 PE=1 SV=1;sp|Q9Y3X0|CCDC9_HUMAN Coiled-coil domain-containing protein 9 OS=Homo sapiens OX=9606 GN=CCDC9 PE=1 SV=1;tr|M0QYB4|M0QYB4_HUMAN Coiled-coil do	A0A2R8Y4Z8;Q9Y3X0;M0QYB4	10.737	A0A2R8Y4Z8	CCDC9	Coiled-coil domain-containing protein 9	18.1468	18.7713	18.4797	18.5067	17.7169	18.1677	18.4695	18.6111	18.2025	17.9934	18.1237	18.6438	18.3526	18.11	17.985	0.482147	0.237694	0.7266	18.2854	4.24176	-0.791341	0.000872364	0.00689016	0.335097	0.0906438	0.579551	18.2854	2.94807	-3.28517	0.0108572	0.039434	0.127019	-0.117434	0.371472	18.2854	1.11747	-6.28184	0.283137	0.471845	-0.247604	-0.492057	-0.00315021	18.2854
1652	tr|F8W020|F8W020_HUMAN Nucleosome assembly protein 1-like 1 (Fragment) OS=Homo sapiens OX=9606 GN=NAP1L1 PE=1 SV=1;tr|F8VXI6|F8VXI6_HUMAN Nucleosome assembly protein 1-like 1 (Fragment) OS=Homo sapiens OX=9606 GN=NAP1L1 PE=1 SV=1;tr|F8VUX1|F8VUX1_HUMAN Nuc	F8W020;F8VXI6;F8VUX1;F8VY35;F8W0J6;F5H4R6;H0YIV4;P55209;F8VVB5	25.344	F8W020	NAP1L1	Nucleosome assembly protein 1-like 1 (Fragment)	21.5616	22.2277	21.7807	21.3575	20.9852	21.3762	21.7972	21.7266	21.0842	20.8169	21.4439	21.8026	21.4596	21.0836	21.4911	0.481894	0.131213	0.832575	21.4663	2.9553	-3.26811	0.0107045	0.0341266	0.195019	-0.155663	0.5457	21.4663	1.19599	-6.11894	0.252128	0.371339	-0.285472	-0.636153	0.0652097	21.4663	-1.75071	-5.44881	0.102497	0.238747	-0.362834	-0.713516	-0.0121532	21.4663
5745	sp|Q9H4A4|AMPB_HUMAN Aminopeptidase B OS=Homo sapiens OX=9606 GN=RNPEP PE=1 SV=2;tr|A6NKB8|A6NKB8_HUMAN Aminopeptidase B OS=Homo sapiens OX=9606 GN=RNPEP PE=1 SV=1	Q9H4A4;A6NKB8	47.11	Q9H4A4	RNPEP	Aminopeptidase B	21.6564	22.3444	22.349	21.8725	21.2359	21.6001	22.0753	22.2407	21.8293	20.999	21.6651	21.9476	22.094	21.5658	21.4419	0.481891	0.213263	0.750519	21.7945	3.85799	-1.52903	0.00182706	0.0109417	0.587382	0.318755	0.85601	21.7945	4.70254	0.0766756	0.000366125	0.00439005	0.115324	-0.153304	0.383952	21.7945	0.923274	-6.47728	0.371948	0.557037	-0.414912	-0.683539	-0.146284	21.7945
2274	sp|O00743|PPP6_HUMAN Serine/threonine-protein phosphatase 6 catalytic subunit OS=Homo sapiens OX=9606 GN=PPP6C PE=1 SV=1	O00743	10.285	O00743	PPP6C	Serine/threonine-protein phosphatase 6 catalytic subunit	19.0825	19.737	19.5391	19.1745	18.9937	19.1131	19.5974	19.4703	19.1736	18.7388	19.2344	19.5408	19.4371	18.944	19.3153	0.481748	0.225969	0.737527	19.2728	4.05059	-1.15777	0.00125877	0.0086818	0.338799	0.0830199	0.594578	19.2728	2.84866	-3.47296	0.0131854	0.0453319	-0.0459964	-0.301775	0.209783	19.2728	-0.386742	-6.83758	0.704928	0.819199	-0.127405	-0.383184	0.128375	19.2728
1775	tr|G3V3Y1|G3V3Y1_HUMAN 15-oxoprostaglandin 13-reductase OS=Homo sapiens OX=9606 PE=3 SV=1;sp|Q8N8N7|PTGR2_HUMAN Prostaglandin reductase 2 OS=Homo sapiens OX=9606 GN=PTGR2 PE=1 SV=1	G3V3Y1;Q8N8N7	4.6354	G3V3Y1	PTGR2	15-oxoprostaglandin 13-reductase	13.6745	14.4382	14.4622	13.9724	13.5044	13.6276	14.1213	14.2297	14.0286	13.4551	13.9323	14.1186	14.2026	14.0158	13.6964	0.481212	0.246005	0.716419	13.9653	4.39996	-0.49017	0.000645795	0.00578071	0.553387	0.31818	0.788594	13.9653	5.0599	0.73664	0.000189999	0.00291726	0.26083	0.0256228	0.496037	13.9653	2.3849	-4.39526	0.0322349	0.106823	-0.192841	-0.428048	0.0423656	13.9653
5582	sp|Q9BVM2|DPCD_HUMAN Protein DPCD OS=Homo sapiens OX=9606 GN=DPCD PE=1 SV=2	Q9BVM2	1.9292	Q9BVM2	DPCD	Protein DPCD	11.4251	11.7223	11.6978	11.5125	10.8759	11.2611	11.7868	11.0395	11.4603	11.1176	11.3897	12.0101	11.6257	11.0871	11.0243	0.481114	0.142334	0.819895	11.4024	3.05417	-3.08	0.00881926	0.0300714	0.0956925	-0.243088	0.434473	11.4024	0.607466	-6.64715	0.553545	0.663483	-0.00531463	-0.344095	0.333466	11.4024	-0.0337379	-6.91605	0.973576	0.987538	-0.352685	-0.691465	-0.013904	11.4024
1564	tr|E9PMW3|E9PMW3_HUMAN Protein FAM118B (Fragment) OS=Homo sapiens OX=9606 GN=FAM118B PE=1 SV=1;tr|E9PMJ2|E9PMJ2_HUMAN Protein FAM118B (Fragment) OS=Homo sapiens OX=9606 GN=FAM118B PE=1 SV=8;tr|J3KP39|J3KP39_HUMAN Protein FAM118B OS=Homo sapiens OX=9606 GN=	E9PMW3;E9PMJ2;J3KP39;Q9BPY3	3.3607	E9PMW3	FAM118B	Protein FAM118B (Fragment)	12.8134	13.4301	13.4979	12.9899	12.4561	13.2977	13.6863	13.314	12.7499	12.2693	13.159	13.5968	13.1215	12.1981	12.6526	0.481052	0.088504	0.873599	13.0155	2.6355	-3.86656	0.0199477	0.0527794	0.221117	-0.171431	0.613665	13.0155	1.21141	-6.10115	0.246356	0.365885	-0.444074	-0.836621	-0.0515261	13.0155	-2.43291	-4.30942	0.0294244	0.0993687	-0.630715	-1.02326	-0.238167	13.0155
1438	tr|E7ESC6|E7ESC6_HUMAN Exportin-7 OS=Homo sapiens OX=9606 GN=XPO7 PE=1 SV=1;sp|Q9UIA9|XPO7_HUMAN Exportin-7 OS=Homo sapiens OX=9606 GN=XPO7 PE=1 SV=3	E7ESC6;Q9UIA9	41.547	E7ESC6	XPO7	Exportin-7	20.2451	20.8787	20.8948	20.4708	20.0044	20.2561	20.7614	20.7621	20.4504	19.8654	20.3338	20.6374	20.6516	20.3148	20.4172	0.480796	0.22428	0.737312	20.4629	4.03097	-1.19551	0.00130728	0.00886615	0.491163	0.234647	0.747679	20.4629	4.11788	-1.03148	0.00110591	0.00869355	0.133652	-0.122864	0.390168	20.4629	1.12053	-6.27851	0.281875	0.470471	-0.182663	-0.439179	0.0738529	20.4629
5944	sp|Q9NRY4|RHG35_HUMAN Rho GTPase-activating protein 35 OS=Homo sapiens OX=9606 GN=ARHGAP35 PE=1 SV=3	Q9NRY4	18.443	Q9NRY4	ARHGAP35	Rho GTPase-activating protein 35	17.0875	17.7218	17.4157	17.0039	16.6301	17.0344	17.4962	17.3502	16.7282	16.4974	17.0957	17.4406	17.2174	16.7413	16.7479	0.480306	0.270336	0.690277	17.0805	4.91952	0.481864	0.000245367	0.00319428	0.255266	0.0452955	0.465236	17.0805	2.61455	-3.9085	0.0207707	0.0618555	-0.248089	-0.45806	-0.0381187	17.0805	-2.54105	-4.11372	0.0239275	0.0861067	-0.447375	-0.657346	-0.237405	17.0805
6202	sp|Q9UHR6|ZNHI2_HUMAN Zinc finger HIT domain-containing protein 2 OS=Homo sapiens OX=9606 GN=ZNHIT2 PE=1 SV=1	Q9UHR6	7.8538	Q9UHR6	ZNHIT2	Zinc finger HIT domain-containing protein 2	16.0009	16.5113	15.9867	15.6892	16.1313	15.8981	16.3216	16.0835	15.7514	16.3181	15.985	16.4902	16.0233	15.4757	16.3416	0.479673	0.296108	0.663237	16.0672	5.61978	1.74041	7.03252e-05	0.00149402	0.069791	-0.113773	0.253355	16.0672	0.817662	-6.49406	0.427637	0.549942	-0.322626	-0.506191	-0.139062	16.0672	-3.77985	-1.74742	0.00212684	0.0151769	0.302305	0.118741	0.48587	16.0672
4123	sp|Q15056|IF4H_HUMAN Eukaryotic translation initiation factor 4H OS=Homo sapiens OX=9606 GN=EIF4H PE=1 SV=5;tr|A0A7I2V385|A0A7I2V385_HUMAN Eukaryotic translation initiation factor 4H OS=Homo sapiens OX=9606 GN=EIF4H PE=1 SV=1;tr|A0A7I2V4E4|A0A7I2V4E4_HUMAN	Q15056;A0A7I2V385;A0A7I2V4E4	24.723	Q15056	EIF4H	Eukaryotic translation initiation factor 4H	21.0661	21.7124	21.4494	21.2614	20.9182	20.9973	21.3702	21.4928	21.0199	20.7802	21.0506	21.4691	21.3139	21.0264	21.3815	0.479219	0.191172	0.767267	21.2206	3.57794	-2.07086	0.00315468	0.0155217	0.380714	0.0926667	0.668761	21.2206	2.84248	-3.48457	0.0133451	0.0456819	0.0645697	-0.223478	0.352617	21.2206	0.48209	-6.79416	0.637404	0.772924	-0.0113582	-0.299406	0.276689	21.2206
5961	sp|Q9NT62|ATG3_HUMAN Ubiquitin-like-conjugating enzyme ATG3 OS=Homo sapiens OX=9606 GN=ATG3 PE=1 SV=1	Q9NT62	13.182	Q9NT62	ATG3	Ubiquitin-like-conjugating enzyme ATG3	19.3174	20.0887	19.7777	19.3527	18.5421	19.3726	19.6779	19.6344	18.9043	18.4562	19.349	19.7069	19.3743	19.0155	19.1803	0.478167	0.0913779	0.864956	19.3167	2.65869	-3.82379	0.019073	0.051059	0.249104	-0.137686	0.635893	19.3167	1.38506	-5.88862	0.188323	0.302333	-0.255529	-0.642318	0.13126	19.3167	-1.42079	-5.9168	0.177889	0.344546	-0.620157	-1.00695	-0.233367	19.3167
3090	sp|P22234|PUR6_HUMAN Multifunctional protein ADE2 OS=Homo sapiens OX=9606 GN=PAICS PE=1 SV=3;tr|E9PBS1|E9PBS1_HUMAN AIR carboxylase (Fragment) OS=Homo sapiens OX=9606 GN=PAICS PE=1 SV=1;tr|D6RF62|D6RF62_HUMAN AIR carboxylase OS=Homo sapiens OX=9606 GN=PAIC	P22234;E9PBS1;D6RF62	55.17	P22234	PAICS	Multifunctional protein ADE2	22.082	22.7408	22.5012	22.1853	21.7537	22.0723	22.4646	22.4484	21.9462	21.5603	22.0457	22.4286	22.1514	21.8814	22.0927	0.477982	0.186678	0.769287	22.157	3.5288	-2.16599	0.0034734	0.0165879	0.30034	0.00903555	0.591645	22.157	2.21732	-4.61708	0.0441763	0.105187	-0.062328	-0.353633	0.228977	22.157	-0.46015	-6.80497	0.652676	0.784595	-0.264438	-0.555743	0.0268662	22.157
2963	sp|P13807|GYS1_HUMAN Glycogen [starch] synthase, muscle OS=Homo sapiens OX=9606 GN=GYS1 PE=1 SV=2	P13807	18.86	P13807	GYS1	Glycogen [starch] synthase, muscle	18.2504	18.7683	18.7074	18.4618	17.9363	18.0795	18.6136	18.6358	18.2881	17.7905	18.2261	18.6079	18.5278	18.0486	17.9672	0.477953	0.264166	0.69174	18.3273	4.80803	0.275748	0.00030117	0.00365887	0.438362	0.224576	0.652149	18.3273	4.40976	-0.474456	0.000633933	0.00617164	0.08082	-0.132967	0.294607	18.3273	0.813019	-6.57363	0.430204	0.608438	-0.287347	-0.501134	-0.0735599	18.3273
3662	sp|P62633|CNBP_HUMAN Cellular nucleic acid-binding protein OS=Homo sapiens OX=9606 GN=CNBP PE=1 SV=1	P62633	27.341	P62633	CNBP	Cellular nucleic acid-binding protein	21.5356	22.2239	22.1217	21.7153	21.9544	21.927	22.3091	22.108	21.4638	21.8147	21.6022	21.9651	21.6418	21.7361	21.8255	0.47776	0.174075	0.781446	21.863	3.38336	-2.44727	0.00462022	0.0196415	0.26891	-0.0347753	0.572596	21.863	1.90435	-5.13654	0.0782256	0.158481	-0.0498667	-0.353552	0.253819	21.863	-0.353142	-6.85066	0.729393	0.834897	0.176562	-0.127124	0.480247	21.863
5376	sp|Q96P70|IPO9_HUMAN Importin-9 OS=Homo sapiens OX=9606 GN=IPO9 PE=1 SV=3	Q96P70	58.064	Q96P70	IPO9	Importin-9	19.7009	20.3507	20.3176	19.9021	19.4177	19.7148	20.1642	20.1885	19.8664	19.1592	19.7599	20.0917	20.0614	19.5969	19.588	0.477005	0.230961	0.72305	19.8587	4.16939	-0.929765	0.00100186	0.0074699	0.463986	0.217942	0.710031	19.8587	4.05559	-1.15114	0.00124668	0.00932737	0.0632531	-0.182791	0.309298	19.8587	0.552881	-6.75598	0.589314	0.737501	-0.336914	-0.582959	-0.0908696	19.8587
2920	sp|P11216|PYGB_HUMAN Glycogen phosphorylase, brain form OS=Homo sapiens OX=9606 GN=PYGB PE=1 SV=5	P11216	124.39	P11216	PYGB	Glycogen phosphorylase, brain form	23.0689	23.6833	23.9206	23.8148	21.9741	23.0016	23.5031	23.8749	23.5009	21.8217	23.1113	23.4263	23.8249	23.4566	22.8689	0.476976	0.0486157	0.905336	23.2568	2.3947	-4.30289	0.0316414	0.073662	0.812854	0.384494	1.24121	23.2568	4.081	-1.10231	0.00118717	0.00901994	0.530191	0.101831	0.958551	23.2568	2.66187	-3.89164	0.0189563	0.0728717	-0.839017	-1.26738	-0.410657	23.2568
3022	sp|P17858|PFKAL_HUMAN ATP-dependent 6-phosphofructokinase, liver type OS=Homo sapiens OX=9606 GN=PFKL PE=1 SV=6	P17858	65.162	P17858	PFKL	ATP-dependent 6-phosphofructokinase, liver type	20.2399	20.8391	20.7814	20.4225	19.6329	20.1424	20.6369	20.6908	20.1633	19.5512	20.3047	20.6402	20.5177	20.1866	19.7935	0.476404	0.265989	0.686819	20.3029	4.86925	0.389101	0.000269068	0.00341212	0.434278	0.223863	0.644693	20.3029	4.43869	-0.41964	0.000600209	0.00594328	0.0284408	-0.181974	0.238856	20.3029	0.290688	-6.87187	0.775673	0.86737	-0.569814	-0.780229	-0.359399	20.3029
1509	tr|E9PGT3|E9PGT3_HUMAN Ribosomal protein S6 kinase OS=Homo sapiens OX=9606 GN=RPS6KA1 PE=1 SV=1;sp|Q15418|KS6A1_HUMAN Ribosomal protein S6 kinase alpha-1 OS=Homo sapiens OX=9606 GN=RPS6KA1 PE=1 SV=2	E9PGT3;Q15418	31.504	E9PGT3	RPS6KA1	Ribosomal protein S6 kinase	18.528	19.1292	19.0393	18.641	18.0913	18.4539	18.9161	18.9736	18.622	17.977	18.5944	18.9559	18.9466	18.4214	18.3777	0.474988	0.260647	0.68933	18.6445	4.76585	0.197389	0.000325581	0.00382012	0.4611	0.246759	0.675442	18.6445	4.6265	-0.0656382	0.000421831	0.00473686	0.0360593	-0.178282	0.250401	18.6445	0.361804	-6.8474	0.723055	0.831461	-0.376745	-0.591086	-0.162404	18.6445
3473	sp|P51570|GALK1_HUMAN Galactokinase OS=Homo sapiens OX=9606 GN=GALK1 PE=1 SV=1	P51570	2.1992	P51570	GALK1	Galactokinase	14.9639	15.6887	15.6028	15.2242	14.5885	14.8161	15.483	15.3527	15.3424	14.1227	15.2329	15.2655	15.4183	15.0524	14.5308	0.47479	0.161989	0.787591	15.1123	3.26434	-2.67688	0.00583705	0.0229375	0.453665	0.140863	0.766466	15.1123	3.1191	-2.95916	0.00776408	0.0312675	0.202061	-0.11074	0.514862	15.1123	1.38924	-5.95789	0.187077	0.357179	-0.590252	-0.903053	-0.277451	15.1123
6134	sp|Q9P2M7|CING_HUMAN Cingulin OS=Homo sapiens OX=9606 GN=CGN PE=1 SV=2	Q9P2M7	40.399	Q9P2M7	CGN	Cingulin	18.1722	18.6899	18.4084	18.3695	18.4375	18.1132	18.5716	18.4781	18.3835	18.5577	18.1381	18.5853	18.3083	18.1052	18.0861	0.474443	0.240368	0.708518	18.3603	4.35905	-0.567863	0.000697854	0.00601262	0.257103	0.023028	0.491179	18.3603	2.36219	-4.36406	0.0336517	0.08671	0.144858	-0.0892168	0.378934	18.3603	1.33092	-6.03203	0.205088	0.379975	0.219255	-0.0148204	0.45333	18.3603
4297	sp|Q53G44|IF44L_HUMAN Interferon-induced protein 44-like OS=Homo sapiens OX=9606 GN=IFI44L PE=2 SV=3	Q53G44	17.248	Q53G44	IFI44L	Interferon-induced protein 44-like	18.5969	19.1622	19.1144	18.5618	16.4545	18.5367	19.0462	19.1076	17.4853	16.1258	18.6502	18.9987	18.9127	16.6173	15.6365	0.474424	-0.252423	1.20127	18.0671	1.40374	-5.86082	0.182806	0.271648	0.450293	-0.276554	1.17714	18.0671	1.33234	-5.95546	0.204633	0.320129	-1.03977	-1.76662	-0.312924	18.0671	-3.07651	-3.10894	0.00844108	0.0411063	-2.52235	-3.24919	-1.7955	18.0671
6244	sp|Q9UK33|ZN580_HUMAN Zinc finger protein 580 OS=Homo sapiens OX=9606 GN=ZNF580 PE=1 SV=1;tr|K7ERU0|K7ERU0_HUMAN Zinc finger protein 580 (Fragment) OS=Homo sapiens OX=9606 GN=ZNF580 PE=1 SV=1;tr|K7ENY2|K7ENY2_HUMAN Zinc finger protein 580 (Fragment) OS=Hom	Q9UK33;K7ERU0;K7ENY2	6.6368	Q9UK33	ZNF580	Zinc finger protein 580	12.6301	13.3542	13.2991	13.4741	13.8192	13.1246	13.387	13.4861	13.7245	14.1943	12.7206	13.1546	13.4525	13.5107	13.293	0.473524	0.0796779	0.86737	13.375	2.5857	-3.95797	0.0219586	0.0568246	0.587489	0.193643	0.981335	13.375	3.20801	-2.78854	0.0065201	0.0276491	0.744663	0.350817	1.13851	13.375	4.06627	-1.19301	0.00122131	0.0101911	0.943754	0.549908	1.3376	13.375
4874	sp|Q8N370|LAT4_HUMAN Large neutral amino acids transporter small subunit 4 OS=Homo sapiens OX=9606 GN=SLC43A2 PE=1 SV=1	Q8N370	2.925	Q8N370	SLC43A2	Large neutral amino acids transporter small subunit 4	14.4002	14.1195	14.3074	14.3312	15.1237	14.5889	16.3171	14.2148	14.6111	14.4709	14.3833	14.3562	14.2474	14.1556	14.058	0.47345	-0.438706	1.38561	14.5123	1.11627	-6.20424	0.283634	0.381172	-0.200928	-1.11308	0.711228	14.5123	-0.473734	-6.72223	0.643201	0.739656	-0.0915328	-1.00369	0.820623	14.5123	-0.215809	-6.89194	0.832338	0.902668	0.0933955	-0.81876	1.00555	14.5123
5508	sp|Q9BRP1|PDD2L_HUMAN Programmed cell death protein 2-like OS=Homo sapiens OX=9606 GN=PDCD2L PE=1 SV=1	Q9BRP1	6.5608	Q9BRP1	PDCD2L	Programmed cell death protein 2-like	13.001	13.6049	13.1072	12.8442	12.8952	12.6611	13.2388	13.209	12.7983	12.9111	13.1128	13.3498	13.0832	12.9878	13.4655	0.472918	0.147131	0.798706	13.0847	3.12187	-2.95057	0.00772205	0.0275707	0.208176	-0.117612	0.533964	13.0847	1.37423	-5.90251	0.191585	0.305949	-0.0481563	-0.373944	0.277631	13.0847	-0.317893	-6.86313	0.755392	0.853792	0.165695	-0.160093	0.491483	13.0847
3544	sp|P55010|IF5_HUMAN Eukaryotic translation initiation factor 5 OS=Homo sapiens OX=9606 GN=EIF5 PE=1 SV=2;tr|H0YN40|H0YN40_HUMAN Eukaryotic translation initiation factor 5 (Fragment) OS=Homo sapiens OX=9606 GN=EIF5 PE=1 SV=1	P55010;H0YN40	51.15	P55010	EIF5	Eukaryotic translation initiation factor 5	20.9746	21.5343	21.3327	21.3849	21.1282	21.0685	21.4887	21.3943	21.5908	21.0999	21.001	21.4391	21.2666	21.3249	21.0748	0.472656	0.318056	0.627255	21.2735	6.57507	3.34702	1.42553e-05	0.000630968	0.316457	0.161858	0.471056	21.2735	4.40221	-0.488781	0.000643055	0.00619953	0.418801	0.264202	0.5734	21.2735	5.82591	2.04781	4.93058e-05	0.00109748	0.0862763	-0.0683228	0.240875	21.2735
4857	sp|Q8N122|RPTOR_HUMAN Regulatory-associated protein of mTOR OS=Homo sapiens OX=9606 GN=RPTOR PE=1 SV=1	Q8N122	7.6979	Q8N122	RPTOR	Regulatory-associated protein of mTOR	16.583	17.1351	16.9303	16.6631	15.9749	16.4294	16.902	16.8759	16.4835	15.9633	16.5333	16.9261	16.8533	16.3829	16.2699	0.472501	0.261364	0.683638	16.5937	4.81284	0.284673	0.000298508	0.00364043	0.371258	0.160121	0.582395	16.5937	3.78159	-1.67979	0.00211964	0.0130268	-0.00540595	-0.216543	0.205731	16.5937	-0.0550643	-6.91504	0.956888	0.978562	-0.445867	-0.657004	-0.23473	16.5937
3188	sp|P30085|KCY_HUMAN UMP-CMP kinase OS=Homo sapiens OX=9606 GN=CMPK1 PE=1 SV=3;tr|Q5T0D2|Q5T0D2_HUMAN Nucleoside-diphosphate kinase OS=Homo sapiens OX=9606 GN=CMPK1 PE=1 SV=1;tr|A0A494BXC7|A0A494BXC7_HUMAN Nucleoside-diphosphate kinase OS=Homo sapiens OX=96	P30085;Q5T0D2;A0A494BXC7	11.374	P30085	CMPK1	UMP-CMP kinase	19.3278	20.0748	19.9233	19.3235	18.9891	19.3258	19.669	19.8498	19.3787	18.8222	19.3556	19.6817	19.7208	19.1802	19.2322	0.472089	0.219398	0.724779	19.457	4.01789	-1.22068	0.00134068	0.00901242	0.494899	0.242208	0.747589	19.457	4.21202	-0.851134	0.000923373	0.00776427	-0.0422754	-0.294966	0.210415	19.457	-0.3598	-6.84817	0.72452	0.832243	-0.321888	-0.574578	-0.0691972	19.457
5805	sp|Q9H900|ZWILC_HUMAN Protein zwilch homolog OS=Homo sapiens OX=9606 GN=ZWILCH PE=1 SV=2	Q9H900	10.855	Q9H900	ZWILCH	Protein zwilch homolog	17.5297	18.1167	18.0515	17.6193	17.1765	17.4579	17.9546	17.8105	17.4775	17.0578	17.5044	17.8366	17.8433	17.2895	17.6059	0.47197	0.192274	0.751666	17.6221	3.62904	-1.97194	0.00285457	0.0145699	0.40441	0.124714	0.684106	17.6221	3.10956	-2.97744	0.00791092	0.0316387	-0.0352525	-0.314948	0.244443	17.6221	-0.271061	-6.8777	0.790413	0.875855	-0.217235	-0.496931	0.0624607	17.6221
5226	sp|Q96C86|DCPS_HUMAN m7GpppX diphosphatase OS=Homo sapiens OX=9606 GN=DCPS PE=1 SV=2;tr|A0A3B3ITF0|A0A3B3ITF0_HUMAN DCS-1 OS=Homo sapiens OX=9606 GN=DCPS PE=1 SV=1	Q96C86;A0A3B3ITF0	28.322	Q96C86	DCPS	m7GpppX diphosphatase	19.612	20.2192	20.1457	19.4342	18.7356	19.5629	20.0455	20.0404	19.2692	18.4776	19.5657	19.8917	20.0767	19.2584	19.4542	0.471963	0.0910157	0.852911	19.5859	2.66444	-3.81318	0.0188621	0.0506864	0.50742	0.126472	0.888367	19.5859	2.86461	-3.44292	0.0127812	0.0444202	-0.259609	-0.640557	0.121338	19.5859	-1.46561	-5.85724	0.165479	0.328024	-0.691026	-1.07197	-0.310078	19.5859
5488	sp|Q9BQ61|TRIR_HUMAN Telomerase RNA component interacting RNase OS=Homo sapiens OX=9606 GN=TRIR PE=1 SV=1	Q9BQ61	16.869	Q9BQ61	TRIR	Telomerase RNA component interacting RNase	16.203	16.6993	16.4869	16.3103	16.0204	16.3709	16.406	16.5796	16.0998	16.2523	16.0358	16.9196	16.314	16.3904	16.5001	0.471703	0.158374	0.785031	16.3725	3.23766	-2.72826	0.00615124	0.0237039	0.256911	-0.0564174	0.57024	16.3725	1.76338	-5.3559	0.100267	0.190567	0.0635729	-0.249756	0.376902	16.3725	0.43635	-6.81615	0.669427	0.795531	0.054348	-0.258981	0.367677	16.3725
2760	sp|P00558|PGK1_HUMAN Phosphoglycerate kinase 1 OS=Homo sapiens OX=9606 GN=PGK1 PE=1 SV=3	P00558	99.664	P00558	PGK1	Phosphoglycerate kinase 1	24.6405	25.357	25.2216	24.6222	23.7218	24.685	25.0512	25.1384	24.3165	23.4366	24.6849	25.0148	24.9378	24.2342	24.0598	0.470824	0.154862	0.786785	24.6082	3.2047	-2.79164	0.00656271	0.0247501	0.42912	0.113159	0.745082	24.6082	2.92084	-3.33675	0.0114513	0.0410299	-0.27919	-0.595152	0.0367714	24.6082	-1.90033	-5.21615	0.078788	0.200145	-0.930765	-1.24673	-0.614804	24.6082
1958	tr|H3BRM0|H3BRM0_HUMAN Phosphomannomutase OS=Homo sapiens OX=9606 GN=PMM2 PE=1 SV=1;sp|O15305|PMM2_HUMAN Phosphomannomutase 2 OS=Homo sapiens OX=9606 GN=PMM2 PE=1 SV=1;tr|H3BV55|H3BV55_HUMAN Phosphomannomutase OS=Homo sapiens OX=9606 GN=PMM2 PE=1 SV=1	H3BRM0;O15305;H3BV55	14.294	H3BRM0	PMM2	Phosphomannomutase	19.5904	20.3101	20.0546	19.6685	19.0914	19.5214	20.007	19.9998	19.5289	18.9473	19.6169	19.8233	19.8045	19.3485	19.5613	0.470605	0.14575	0.795461	19.6583	3.11551	-2.96274	0.00781899	0.0278388	0.376744	0.0518883	0.7016	19.6583	2.49413	-4.12798	0.0261791	0.0722507	-0.0609169	-0.385773	0.263939	19.6583	-0.403283	-6.83072	0.693005	0.810522	-0.376227	-0.701082	-0.0513709	19.6583
6209	sp|Q9UI26|IPO11_HUMAN Importin-11 OS=Homo sapiens OX=9606 GN=IPO11 PE=1 SV=1;tr|F8WDV0|F8WDV0_HUMAN Importin-11 OS=Homo sapiens OX=9606 GN=IPO11 PE=1 SV=1	Q9UI26;F8WDV0	9.4177	Q9UI26	IPO11	Importin-11	17.0351	17.6106	17.4436	16.9974	16.6816	17.1265	17.5796	17.2875	16.8943	16.4911	17.0242	17.4074	17.2867	16.7986	16.6918	0.470591	0.292672	0.64851	17.0904	5.68832	1.86003	6.24527e-05	0.00141485	0.277353	0.0994338	0.455272	17.0904	3.35253	-2.51005	0.0049086	0.0228196	-0.165164	-0.343083	0.0127548	17.0904	-1.99644	-5.06092	0.0662965	0.177628	-0.440432	-0.618352	-0.262513	17.0904
5811	sp|Q9H9A6|LRC40_HUMAN Leucine-rich repeat-containing protein 40 OS=Homo sapiens OX=9606 GN=LRRC40 PE=1 SV=1	Q9H9A6	12.418	Q9H9A6	LRRC40	Leucine-rich repeat-containing protein 40	18.4129	19.0298	18.8887	18.459	18.0765	18.3293	18.8686	18.7606	18.2955	17.9665	18.4486	18.7	18.5638	18.0856	18.4284	0.469219	0.187696	0.750743	18.4876	3.58446	-2.05824	0.00311468	0.0153944	0.340805	0.0592818	0.622329	18.4876	2.60348	-3.92882	0.021219	0.0627026	-0.116894	-0.398417	0.16463	18.4876	-0.892974	-6.50484	0.387392	0.572455	-0.239788	-0.521311	0.0417359	18.4876
5980	sp|Q9NUQ8|ABCF3_HUMAN ATP-binding cassette sub-family F member 3 OS=Homo sapiens OX=9606 GN=ABCF3 PE=1 SV=2	Q9NUQ8	64.159	Q9NUQ8	ABCF3	ATP-binding cassette sub-family F member 3	19.8047	20.4252	20.2539	19.8536	19.2345	19.7542	20.1945	20.2119	19.7975	19.0529	19.7894	20.1353	20.0527	19.8633	19.627	0.46892	0.211108	0.726732	19.87	3.91164	-1.42544	0.00164646	0.0102457	0.390081	0.13227	0.647893	19.87	3.25398	-2.70009	0.00595707	0.0261326	0.0553925	-0.202419	0.313204	19.87	0.462074	-6.80404	0.65133	0.783759	-0.477971	-0.735783	-0.22016	19.87
3928	sp|Q13153|PAK1_HUMAN Serine/threonine-protein kinase PAK 1 OS=Homo sapiens OX=9606 GN=PAK1 PE=1 SV=2;tr|E9PM17|E9PM17_HUMAN Serine/threonine-protein kinase PAK 1 OS=Homo sapiens OX=9606 GN=PAK1 PE=1 SV=1;tr|B3KNX7|B3KNX7_HUMAN Non-specific serine/threonine	Q13153;E9PM17;B3KNX7	37.092	Q13153	PAK1	Serine/threonine-protein kinase PAK 1	18.5996	19.272	19.1121	18.7544	17.9525	18.5452	18.9716	19.0067	18.68	17.9224	18.6037	18.9113	18.9439	18.5025	18.3997	0.468811	0.201454	0.736167	18.6785	3.77112	-1.69695	0.00216331	0.0121981	0.438067	0.17071	0.705423	18.6785	3.52381	-2.17883	0.00350754	0.0183655	0.0628239	-0.204532	0.33018	18.6785	0.505356	-6.78217	0.621395	0.761757	-0.491282	-0.758639	-0.223926	18.6785
6390	sp|Q9Y2U5|M3K2_HUMAN Mitogen-activated protein kinase kinase kinase 2 OS=Homo sapiens OX=9606 GN=MAP3K2 PE=1 SV=2	Q9Y2U5	2.0986	Q9Y2U5	MAP3K2	Mitogen-activated protein kinase kinase kinase 2	11.8862	12.3168	12.7603	12.3303	11.4333	12.2673	12.6788	12.4748	12.6299	11.1409	11.8817	12.4447	12.1964	11.9758	11.6796	0.468381	0.0610791	0.875683	12.1398	2.47312	-4.16244	0.0272519	0.0664622	0.465436	0.0581345	0.872738	12.1398	2.45758	-4.19388	0.028073	0.076222	0.30026	-0.107042	0.707562	12.1398	1.58542	-5.69161	0.13583	0.288231	-0.593799	-1.0011	-0.186497	12.1398
4458	sp|Q5VV41|ARHGG_HUMAN Rho guanine nucleotide exchange factor 16 OS=Homo sapiens OX=9606 GN=ARHGEF16 PE=1 SV=1	Q5VV41	26.233	Q5VV41	ARHGEF16	Rho guanine nucleotide exchange factor 16	16.3931	16.9041	16.8196	16.3711	16.1664	16.221	16.6588	16.7809	16.4225	16.0152	16.3777	16.8325	16.4842	16.1786	16.3742	0.467874	0.2237	0.712049	16.4667	4.1209	-1.02273	0.00109953	0.00799041	0.364285	0.12011	0.608459	16.4667	3.20851	-2.78759	0.00651376	0.0276491	-0.00656048	-0.250735	0.237614	16.4667	-0.0577827	-6.91488	0.954762	0.977665	-0.145344	-0.389519	0.0988303	16.4667
3511	sp|P53367|ARFP1_HUMAN Arfaptin-1 OS=Homo sapiens OX=9606 GN=ARFIP1 PE=1 SV=2	P53367	55.288	P53367	ARFIP1	Arfaptin-1	17.8356	18.1099	18.1059	17.7468	17.972	17.8491	18.7545	18.0992	17.9171	17.8722	17.8293	18.0531	18.1167	17.9507	17.9933	0.467828	0.172869	0.762787	18.0137	3.41105	-2.39378	0.00437581	0.019014	0.26924	-0.0257187	0.564199	18.0137	1.9631	-5.04224	0.0704096	0.147321	0.0335702	-0.261388	0.328529	18.0137	0.244769	-6.88488	0.810288	0.889668	0.107802	-0.187157	0.402761	18.0137
2298	sp|O14744|ANM5_HUMAN Protein arginine N-methyltransferase 5 OS=Homo sapiens OX=9606 GN=PRMT5 PE=1 SV=4;tr|G3V580|G3V580_HUMAN Protein arginine N-methyltransferase 5 (Fragment) OS=Homo sapiens OX=9606 GN=PRMT5 PE=1 SV=1	O14744;G3V580	51.996	O14744	PRMT5	Protein arginine N-methyltransferase 5	22.0719	22.6294	22.3977	22.1118	22.121	22.0374	22.4895	22.3343	22.1302	21.9848	22.0746	22.4664	22.2429	21.9803	22.1005	0.467131	0.316236	0.618026	22.2115	6.65773	3.47982	1.24903e-05	0.000587195	0.263682	0.112787	0.414577	22.2115	3.7581	-1.72524	0.00221888	0.0134677	0.0127851	-0.13811	0.16368	22.2115	0.182219	-6.89902	0.858098	0.920706	0.00745895	-0.143436	0.158354	22.2115
3231	sp|P33897|ABCD1_HUMAN ATP-binding cassette sub-family D member 1 OS=Homo sapiens OX=9606 GN=ABCD1 PE=1 SV=2	P33897	12.65	P33897	ABCD1	ATP-binding cassette sub-family D member 1	17.0606	17.4789	17.181	17.1478	17.2814	17.0182	17.5335	17.2149	17.0249	17.2086	17.0838	17.5514	17.1487	16.5282	16.8067	0.467008	0.165554	0.768462	17.1512	3.3317	-2.54703	0.00511359	0.020814	0.127302	-0.174152	0.428756	17.1512	0.908188	-6.41551	0.379583	0.503292	-0.15397	-0.455424	0.147484	17.1512	-1.09844	-6.30238	0.291069	0.479788	0.0446463	-0.256808	0.3461	17.1512
4508	sp|Q6FI81|CPIN1_HUMAN Anamorsin OS=Homo sapiens OX=9606 GN=CIAPIN1 PE=1 SV=2;tr|H3BV90|H3BV90_HUMAN Anamorsin OS=Homo sapiens OX=9606 GN=CIAPIN1 PE=1 SV=1;tr|H3BT65|H3BT65_HUMAN Anamorsin OS=Homo sapiens OX=9606 GN=CIAPIN1 PE=1 SV=1;tr|H3BUG4|H3BUG4_HUMAN	Q6FI81;H3BV90;H3BT65;H3BUG4;H3BPG7	21.44	Q6FI81	CIAPIN1	Anamorsin	19.7997	20.488	20.2912	19.8458	19.2445	19.7717	20.1698	20.2076	19.6342	19.1703	19.8579	20.172	20.1281	19.6029	19.7915	0.466833	0.166846	0.76682	19.8783	3.34674	-2.518	0.00496478	0.0204833	0.399176	0.0991889	0.699163	19.8783	2.86171	-3.44839	0.0128538	0.0445753	-0.115481	-0.415468	0.184506	19.8783	-0.827888	-6.56127	0.422017	0.601873	-0.407695	-0.707682	-0.107708	19.8783
221	tr|A0A0A0MRJ6|A0A0A0MRJ6_HUMAN Protein-L-isoaspartate O-methyltransferase OS=Homo sapiens OX=9606 GN=PCMT1 PE=1 SV=1;sp|P22061|PIMT_HUMAN Protein-L-isoaspartate(D-aspartate) O-methyltransferase OS=Homo sapiens OX=9606 GN=PCMT1 PE=1 SV=4;tr|F6S8N6|F6S8N6_HU	A0A0A0MRJ6;P22061;F6S8N6;A0A3F2YNX8	45.6	A0A0A0MRJ6	PCMT1	Protein-L-isoaspartate O-methyltransferase	20.9718	21.6103	21.4912	21.0678	20.3023	20.9572	21.3826	21.404	20.927	20.0783	21.0481	21.3837	21.323	20.876	20.7203	0.466463	0.191677	0.741248	21.0363	3.65078	-1.92984	0.00273579	0.0142566	0.413714	0.138928	0.6885	21.0363	3.23794	-2.73098	0.00614783	0.0265558	-0.0354403	-0.310226	0.239345	21.0363	-0.277374	-6.87587	0.785662	0.874037	-0.625418	-0.900204	-0.350633	21.0363
2841	sp|P07902|GALT_HUMAN Galactose-1-phosphate uridylyltransferase OS=Homo sapiens OX=9606 GN=GALT PE=1 SV=3	P07902	2.2813	P07902	GALT	Galactose-1-phosphate uridylyltransferase	11.3391	12.1737	12.4264	12.3204	11.5548	11.2783	11.562	12.1555	12.087	10.685	11.6542	11.9338	11.9577	11.8095	10.9621	0.465986	0.000615612	0.931356	11.7266	2.15346	-4.72277	0.0497377	0.101909	0.756021	0.290651	1.22139	11.7266	3.4938	-2.23692	0.00372007	0.018959	0.648427	0.183057	1.1138	11.7266	2.99658	-3.26175	0.00987332	0.0462499	-0.356564	-0.821934	0.108806	11.7266
3451	sp|P50570|DYN2_HUMAN Dynamin-2 OS=Homo sapiens OX=9606 GN=DNM2 PE=1 SV=2	P50570	89.106	P50570	DNM2	Dynamin-2	21.9923	22.5751	22.4897	22.2279	21.5532	21.9768	22.3789	22.4742	22.0952	21.552	22.0038	22.416	22.3213	21.9706	21.9284	0.465675	0.245224	0.686125	22.1304	4.54291	-0.21995	0.000493279	0.00488369	0.43742	0.21697	0.657871	22.1304	4.26727	-0.745563	0.000830926	0.00725721	0.106945	-0.113506	0.327396	22.1304	1.0433	-6.36023	0.31499	0.502185	-0.313112	-0.533563	-0.0926611	22.1304
1556	sp|Q9NRN7|ADPPT_HUMAN L-aminoadipate-semialdehyde dehydrogenase-phosphopantetheinyl transferase OS=Homo sapiens OX=9606 GN=AASDHPPT PE=1 SV=2;tr|E9PLW6|E9PLW6_HUMAN 4-phosphopantetheinyl transferase (Fragment) OS=Homo sapiens OX=9606 GN=AASDHPPT PE=1 SV=1	Q9NRN7;E9PLW6;E9PNF3	11.049	Q9NRN7	AASDHPPT	L-aminoadipate-semialdehyde dehydrogenase-phosphopantetheinyl transferase	16.9291	17.578	17.3114	16.7889	16.6982	16.819	17.2936	17.2569	16.787	16.552	16.9614	17.2346	17.1923	16.6368	17.0987	0.465559	0.200978	0.730139	17.0092	3.78424	-1.67157	0.00210873	0.0119752	0.350348	0.085767	0.614929	17.0092	2.84776	-3.47464	0.0132083	0.0453601	-0.165619	-0.4302	0.0989616	17.0092	-1.34622	-6.01281	0.200232	0.374135	-0.120172	-0.384753	0.144409	17.0092
4822	sp|Q8IXQ3|CI040_HUMAN Uncharacterized protein C9orf40 OS=Homo sapiens OX=9606 GN=C9orf40 PE=1 SV=1	Q8IXQ3	4.3347	Q8IXQ3	C9orf40	Uncharacterized protein C9orf40	14.324	14.8949	14.2432	14.1872	14.9615	14.1468	14.8922	14.6471	13.4045	14.9998	14.4378	14.5173	13.9984	14.5283	14.9525	0.465311	-0.0259618	0.956583	14.4757	2.03696	-4.91791	0.0615949	0.119276	-0.00661718	-0.49789	0.484655	14.4757	-0.0289677	-6.83991	0.977311	0.985358	-0.262842	-0.754114	0.228431	14.4757	-1.15063	-6.24535	0.269706	0.456513	0.668421	0.177148	1.15969	14.4757
4988	sp|Q8NI08|NCOA7_HUMAN Nuclear receptor coactivator 7 OS=Homo sapiens OX=9606 GN=NCOA7 PE=1 SV=2	Q8NI08	9.1599	Q8NI08	NCOA7	Nuclear receptor coactivator 7	17.3833	17.9299	17.4173	16.8373	16.5359	17.2412	17.7196	17.298	16.6424	16.2649	17.3372	17.706	17.2444	16.5608	16.7186	0.464625	0.226596	0.702654	17.1224	4.19794	-0.875124	0.000948579	0.00722984	-0.000693872	-0.238723	0.237335	17.1224	-0.0062692	-6.84034	0.995089	0.997236	-0.640405	-0.878434	-0.402376	17.1224	-5.78612	1.97882	5.27797e-05	0.00115	-0.814095	-1.05212	-0.576066	17.1224
3047	sp|P19474|RO52_HUMAN E3 ubiquitin-protein ligase TRIM21 OS=Homo sapiens OX=9606 GN=TRIM21 PE=1 SV=1	P19474	21.172	P19474	TRIM21	E3 ubiquitin-protein ligase TRIM21	19.3781	19.925	19.6693	19.1271	18.0358	19.2962	19.7058	19.5482	18.6108	17.8707	19.3404	19.7777	19.3494	18.2117	18.3823	0.46461	0.0703312	0.858889	19.0819	2.53424	-4.05183	0.0242421	0.0608298	0.184012	-0.210266	0.578291	19.0819	1.00371	-6.32477	0.333037	0.456837	-0.688385	-1.08266	-0.294106	19.0819	-3.75483	-1.79597	0.00223303	0.01576	-1.24198	-1.63626	-0.847701	19.0819
442	tr|Q5JNW7|Q5JNW7_HUMAN Proteasome subunit beta type-8 OS=Homo sapiens OX=9606 GN=PSMB8 PE=1 SV=1;tr|A0A140T998|A0A140T998_HUMAN Proteasome subunit beta type-8 OS=Homo sapiens OX=9606 GN=PSMB8 PE=1 SV=1;tr|X5D2R7|X5D2R7_HUMAN Proteasome subunit beta OS=Homo	Q5JNW7;A0A140T998;X5D2R7;P28062	24.71	Q5JNW7	PSMB8	Proteasome subunit beta type-8	20.6274	21.1335	20.7004	20.2154	19.3508	20.4155	20.9438	20.8233	19.7497	18.8787	20.5648	20.923	20.4683	19.7046	19.5465	0.464175	0.108234	0.820116	20.2697	2.80457	-3.55236	0.0143687	0.0415589	0.128067	-0.227874	0.484008	20.2697	0.773789	-6.52945	0.452291	0.573312	-0.64604	-1.00198	-0.290099	20.2697	-3.90341	-1.50784	0.00167293	0.012645	-1.27725	-1.63319	-0.921312	20.2697
4867	sp|Q8N1G4|LRC47_HUMAN Leucine-rich repeat-containing protein 47 OS=Homo sapiens OX=9606 GN=LRRC47 PE=1 SV=1	Q8N1G4	84.268	Q8N1G4	LRRC47	Leucine-rich repeat-containing protein 47	21.6669	22.2152	22.0721	21.893	21.2766	21.6255	22.0596	22.0456	21.699	21.2463	21.6923	22.0995	21.9271	21.5493	21.487	0.463199	0.267603	0.658795	21.7703	5.09296	0.799512	0.000178959	0.0026618	0.353368	0.157772	0.548964	21.7703	3.88535	-1.47925	0.00173257	0.0115029	0.0522182	-0.143378	0.247814	21.7703	0.574149	-6.74353	0.575236	0.725714	-0.324934	-0.52053	-0.129338	21.7703
3524	sp|P53999|TCP4_HUMAN Activated RNA polymerase II transcriptional coactivator p15 OS=Homo sapiens OX=9606 GN=SUB1 PE=1 SV=3	P53999	18.428	P53999	SUB1	Activated RNA polymerase II transcriptional coactivator p15	22.3448	22.9741	22.6674	22.1643	22.1811	22.2334	22.682	22.6602	22.1425	22.0489	22.3288	22.639	22.6148	22.0209	22.4915	0.462711	0.230311	0.695111	22.4129	4.28191	-0.714726	0.000808075	0.00659908	0.345125	0.112725	0.577525	22.4129	3.19377	-2.81592	0.00670513	0.0281421	-0.193118	-0.425518	0.0392816	22.4129	-1.78711	-5.39328	0.0962077	0.2287	-0.0618199	-0.29422	0.17058	22.4129
4760	sp|Q86X76|NIT1_HUMAN Deaminated glutathione amidase OS=Homo sapiens OX=9606 GN=NIT1 PE=1 SV=2	Q86X76	3.0603	Q86X76	NIT1	Deaminated glutathione amidase	15.1268	15.6945	15.5055	15.159	14.7	15.0679	15.4205	15.5814	15.2751	14.7602	15.1235	15.5908	15.4322	15.2569	14.7764	0.462537	0.304341	0.620734	15.2314	6.28799	2.87806	2.27254e-05	0.000817343	0.400329	0.242133	0.558526	15.2314	5.4423	1.42519	9.59256e-05	0.00188506	0.124258	-0.0339394	0.282454	15.2314	1.68923	-5.54096	0.113948	0.257505	-0.360526	-0.518723	-0.202329	15.2314
481	tr|A0A3B3IU56|A0A3B3IU56_HUMAN Hydroxymethylbilane synthase OS=Homo sapiens OX=9606 GN=HMBS PE=1 SV=1;tr|F5GY90|F5GY90_HUMAN Hydroxymethylbilane synthase (Fragment) OS=Homo sapiens OX=9606 GN=HMBS PE=1 SV=1;tr|A0A1W2PNU5|A0A1W2PNU5_HUMAN Hydroxymethylbilan	A0A3B3IU56;F5GY90;A0A1W2PNU5;A0A3B3IU34;F5H0P4;F5H345;A0A3B3IRR1;A0A3F2YNY7;P08397;F5H226	11.61	A0A3B3IU56	HMBS	Hydroxymethylbilane synthase	19.1262	19.7484	19.6973	19.0801	18.8252	19.0991	19.5821	19.577	19.0752	18.7085	19.2014	19.4827	19.5546	18.8531	18.9927	0.462153	0.262629	0.661676	19.2402	4.98143	0.595669	0.000219128	0.00303675	0.467393	0.267869	0.666917	19.2402	5.03791	0.696488	0.000197729	0.00298327	-0.139448	-0.338971	0.0600761	19.2402	-1.50307	-5.80644	0.155671	0.315205	-0.300118	-0.499641	-0.100594	19.2402
211	tr|H0Y702|H0Y702_HUMAN SCL-interrupting locus protein (Fragment) OS=Homo sapiens OX=9606 GN=STIL PE=1 SV=1;tr|Q5T0C7|Q5T0C7_HUMAN SCL-interrupting locus protein (Fragment) OS=Homo sapiens OX=9606 GN=STIL PE=1 SV=1;tr|A0A0A0MR87|A0A0A0MR87_HUMAN SCL-interru	H0Y702;Q5T0C7;A0A0A0MR87;E9PSF2;Q15468	3.63	H0Y702	STIL	SCL-interrupting locus protein (Fragment)	13.1827	13.5835	13.3044	12.7117	13.1208	12.726	13.2858	12.8343	12.7291	12.6491	12.8707	13.2957	13.0886	12.5852	12.7968	0.461818	0.141282	0.782355	12.9843	3.09854	-2.99522	0.00808389	0.0283694	0.14924	-0.171296	0.469777	12.9843	1.00132	-6.32713	0.334148	0.457728	-0.251179	-0.571716	0.069357	12.9843	-1.68527	-5.54681	0.114722	0.258428	-0.0709461	-0.391482	0.24959	12.9843
2418	sp|O43598|DNPH1_HUMAN 2-deoxynucleoside 5-phosphate N-hydrolase 1 OS=Homo sapiens OX=9606 GN=DNPH1 PE=1 SV=1;tr|H0Y8X4|H0Y8X4_HUMAN 2-deoxynucleoside 5-phosphate N-hydrolase 1 (Fragment) OS=Homo sapiens OX=9606 GN=DNPH1 PE=1 SV=1	O43598;H0Y8X4	19.719	O43598	DNPH1	2-deoxynucleoside 5-phosphate N-hydrolase 1	18.0872	18.7498	18.7307	18.2577	17.1468	18.0361	18.4348	18.6061	18.0572	17.1468	17.9473	18.2712	18.5249	17.9615	18.0271	0.461761	0.046775	0.876748	18.1323	2.39302	-4.30586	0.031742	0.0737481	0.59708	0.182094	1.01207	18.1323	3.0943	-3.00664	0.00815148	0.032256	0.0686507	-0.346336	0.483637	18.1323	0.355774	-6.84968	0.727465	0.833998	-0.583248	-0.998234	-0.168262	18.1323
3220	sp|P32119|PRDX2_HUMAN Peroxiredoxin-2 OS=Homo sapiens OX=9606 GN=PRDX2 PE=1 SV=5;tr|A6NIW5|A6NIW5_HUMAN Peroxiredoxin 2, isoform CRA_a OS=Homo sapiens OX=9606 GN=PRDX2 PE=1 SV=2	P32119;A6NIW5	27.87	P32119	PRDX2	Peroxiredoxin-2	23.6627	24.371	24.3816	24.0549	23.3656	23.702	24.0815	24.397	23.8651	23.2025	23.7969	24.0939	24.2292	23.6707	23.7571	0.461654	0.174301	0.749008	23.9088	3.45512	-2.30856	0.00401328	0.0180577	0.615429	0.328075	0.902782	23.9088	4.606	-0.104099	0.000438296	0.00485356	0.143078	-0.144276	0.430432	23.9088	1.07083	-6.33167	0.302875	0.490237	-0.278789	-0.566143	0.0085644	23.9088
3371	sp|P47712|PA24A_HUMAN Cytosolic phospholipase A2 OS=Homo sapiens OX=9606 GN=PLA2G4A PE=1 SV=2	P47712	39.693	P47712	PLA2G4A	Cytosolic phospholipase A2	19.9963	20.734	20.8358	20.5419	20.2644	20.0717	20.4394	20.7904	20.4532	20.2107	20.0678	20.347	20.6449	20.3161	20.7732	0.461529	0.17135	0.751709	20.4324	3.42055	-2.37541	0.00429495	0.0188433	0.711745	0.421566	1.00192	20.4324	5.27499	1.12629	0.000129048	0.00230801	0.39179	0.101611	0.681969	20.4324	2.90369	-3.43833	0.0118417	0.0524595	0.370796	0.0806171	0.660975	20.4324
2772	sp|P02792|FRIL_HUMAN Ferritin light chain OS=Homo sapiens OX=9606 GN=FTL PE=1 SV=2	P02792	9.2434	P02792	FTL	Ferritin light chain	16.6085	16.9522	16.5547	17.1207	16.9465	16.6494	17.1839	16.7168	17.3551	17.0443	16.5776	17.0828	16.5618	16.426	16.1453	0.461156	-0.0261206	0.948434	16.795	2.03533	-4.9206	0.0617782	0.119429	-0.000727372	-0.488004	0.48655	16.795	-0.00321028	-6.84035	0.997485	0.997642	0.355456	-0.131821	0.842733	16.795	1.56882	-5.7151	0.139646	0.293394	0.100225	-0.387052	0.587502	16.795
4212	sp|Q16512|PKN1_HUMAN Serine/threonine-protein kinase N1 OS=Homo sapiens OX=9606 GN=PKN1 PE=1 SV=2	Q16512	5.0353	Q16512	PKN1	Serine/threonine-protein kinase N1	14.206	14.909	14.5223	14.0182	13.3675	14.2285	14.5876	14.3553	13.6231	13.2509	14.1372	14.4569	14.1589	13.8589	13.6086	0.460614	0.170146	0.751081	14.0859	3.41037	-2.39509	0.00438163	0.019014	0.154941	-0.135527	0.445409	14.0859	1.14718	-6.17401	0.271079	0.390976	-0.357152	-0.647619	-0.0666839	14.0859	-2.64434	-3.92406	0.0196096	0.074395	-0.78155	-1.07202	-0.491082	14.0859
5166	sp|Q93008|USP9X_HUMAN Probable ubiquitin carboxyl-terminal hydrolase FAF-X OS=Homo sapiens OX=9606 GN=USP9X PE=1 SV=4	Q93008	76.4	Q93008	USP9X	Probable ubiquitin carboxyl-terminal hydrolase FAF-X	20.408	20.9634	20.887	20.5257	19.9958	20.3934	20.8667	20.7064	20.5081	19.8212	20.4408	20.7936	20.7204	20.309	20.1704	0.46048	0.262146	0.658814	20.5007	4.99317	0.617193	0.000214492	0.00299442	0.357198	0.158864	0.555532	20.5007	3.87324	-1.50264	0.00177376	0.0117495	0.0335481	-0.164786	0.231882	20.5007	0.363776	-6.84665	0.721615	0.831167	-0.418289	-0.616623	-0.219955	20.5007
4012	sp|Q13867|BLMH_HUMAN Bleomycin hydrolase OS=Homo sapiens OX=9606 GN=BLMH PE=1 SV=1;tr|K7ES02|K7ES02_HUMAN Bleomycin hydrolase (Fragment) OS=Homo sapiens OX=9606 GN=BLMH PE=1 SV=1;tr|K7ESE8|K7ESE8_HUMAN Bleomycin hydrolase (Fragment) OS=Homo sapiens OX=9606	Q13867;K7ES02;K7ESE8	23.829	Q13867	BLMH	Bleomycin hydrolase	20.6514	21.3199	21.4248	21.2874	20.2598	20.7128	21.1478	21.4796	21.315	20.1627	20.8158	21.091	21.3332	21.2254	20.9003	0.459573	0.148743	0.770403	21.0085	3.17977	-2.83954	0.00689213	0.0255298	0.685896	0.375067	0.996726	21.0085	4.74568	0.157132	0.000337963	0.0041381	0.549274	0.238444	0.860104	21.0085	3.8004	-1.70754	0.00204345	0.0148331	-0.285722	-0.596552	0.0251075	21.0085
5870	sp|Q9HD15|SRA1_HUMAN Steroid receptor RNA activator 1 OS=Homo sapiens OX=9606 GN=SRA1 PE=1 SV=1	Q9HD15	7.3464	Q9HD15	SRA1	Steroid receptor RNA activator 1	17.3709	17.9692	17.7497	17.2848	16.7273	17.3883	17.7498	17.6995	16.8223	16.5512	17.2353	17.654	17.5499	16.9669	17.3112	0.459526	0.101996	0.817055	17.3353	2.76414	-3.62799	0.015545	0.044021	0.334888	-0.0226419	0.692418	17.3353	2.01442	-4.95857	0.0641713	0.13794	-0.306816	-0.664346	0.0507137	17.3353	-1.84556	-5.30264	0.0868246	0.212996	-0.468263	-0.825793	-0.110733	17.3353
2036	tr|I3L0X5|I3L0X5_HUMAN Sperm-associated antigen 7 OS=Homo sapiens OX=9606 GN=SPAG7 PE=1 SV=1;sp|O75391|SPAG7_HUMAN Sperm-associated antigen 7 OS=Homo sapiens OX=9606 GN=SPAG7 PE=1 SV=2;tr|I3L4C3|I3L4C3_HUMAN Sperm-associated antigen 7 OS=Homo sapiens OX=96	I3L0X5;O75391;I3L4C3	8.3069	I3L0X5	SPAG7	Sperm-associated antigen 7	17.2429	17.8693	17.4823	17.0608	16.599	17.1099	17.3802	17.5687	16.7354	16.6393	17.1976	17.6785	17.1854	16.9384	17.1378	0.45922	0.124812	0.793628	17.1884	2.9533	-3.27191	0.0107467	0.0341725	0.228694	-0.105714	0.563102	17.1884	1.47076	-5.77586	0.164102	0.274092	-0.27193	-0.606338	0.0624778	17.1884	-1.74881	-5.45168	0.102834	0.239223	-0.391434	-0.725842	-0.0570263	17.1884
979	tr|A6NIR2|A6NIR2_HUMAN Chromosome 1 open reading frame 41, isoform CRA_b OS=Homo sapiens OX=9606 GN=HSPB11 PE=1 SV=1;tr|X6R7Y7|X6R7Y7_HUMAN Intraflagellar transport protein 25 homolog OS=Homo sapiens OX=9606 GN=HSPB11 PE=1 SV=1;sp|Q9Y547|IFT25_HUMAN Intraf	A6NIR2;X6R7Y7;Q9Y547	7.4216	A6NIR2	HSPB11	Chromosome 1 open reading frame 41, isoform CRA_b	17.2207	17.9209	17.8248	17.2621	17.0123	17.408	17.7413	17.5913	17.2427	16.6843	17.4725	17.8161	17.5905	17.1899	17.4583	0.459039	0.14349	0.774587	17.4291	3.12857	-2.93773	0.00762106	0.0273328	0.301791	-0.0137572	0.61734	17.4291	2.05685	-4.88853	0.0594013	0.130147	-0.135479	-0.451027	0.18007	17.4291	-0.923353	-6.4772	0.371908	0.557037	-0.315448	-0.630996	0.000100577	17.4291
1815	tr|H0Y3V5|H0Y3V5_HUMAN Thyroid adenoma-associated protein (Fragment) OS=Homo sapiens OX=9606 GN=THADA PE=1 SV=1;sp|Q6YHU6|THADA_HUMAN Thyroid adenoma-associated protein OS=Homo sapiens OX=9606 GN=THADA PE=1 SV=1	H0Y3V5;Q6YHU6	11.621	H0Y3V5	THADA	Thyroid adenoma-associated protein (Fragment)	15.6882	16.2991	16.3268	15.7209	15.2713	15.8945	16.2888	16.1019	15.78	14.8497	15.7351	16.1066	16.0079	15.3846	15.6957	0.458903	0.0910508	0.826755	15.8101	2.68294	-3.77897	0.0181986	0.0492988	0.372913	0.00506133	0.740765	15.8101	2.18021	-4.68074	0.0473333	0.110352	-0.144095	-0.511948	0.223757	15.8101	-0.842442	-6.54899	0.414103	0.594672	-0.50034	-0.868192	-0.132488	15.8101
4137	sp|Q15181|IPYR_HUMAN Inorganic pyrophosphatase OS=Homo sapiens OX=9606 GN=PPA1 PE=1 SV=2;tr|Q5SQT6|Q5SQT6_HUMAN Inorganic diphosphatase OS=Homo sapiens OX=9606 GN=PPA1 PE=1 SV=1	Q15181;Q5SQT6	45.785	Q15181	PPA1	Inorganic pyrophosphatase	22.3402	23.0277	22.6888	22.1167	21.3918	22.3211	22.7404	22.6535	21.7986	21.0294	22.2963	22.5648	22.4236	21.8136	21.7726	0.458407	0.108567	0.808248	22.1986	2.81802	-3.52714	0.013997	0.0409114	0.269439	-0.0804019	0.619279	22.1986	1.65635	-5.51539	0.120519	0.21744	-0.409579	-0.759419	-0.059738	22.1986	-2.51785	-4.15596	0.0250164	0.0885237	-0.921293	-1.27113	-0.571453	22.1986
3670	sp|P62805|H4_HUMAN Histone H4 OS=Homo sapiens OX=9606 GN=H4C1 PE=1 SV=2	P62805	56.434	P62805	H4C1	Histone H4	27.9442	27.9946	28.2852	27.5666	27.9852	26.9206	28.2439	27.5038	27.3424	28.0259	27.9369	27.9384	28.2508	27.589	27.9524	0.458406	-0.0682587	0.98507	27.832	1.87188	-5.18436	0.0828742	0.148279	0.412695	-0.113969	0.93936	27.832	1.68523	-5.473	0.11473	0.210515	-0.101253	-0.627918	0.425412	27.832	-0.413463	-6.82635	0.68571	0.806316	0.387246	-0.139419	0.91391	27.832
4432	tr|Q5TCZ7|Q5TCZ7_HUMAN Copper homeostasis protein cutC homolog (Fragment) OS=Homo sapiens OX=9606 GN=CUTC PE=1 SV=1;sp|Q9NTM9|CUTC_HUMAN Copper homeostasis protein cutC homolog OS=Homo sapiens OX=9606 GN=CUTC PE=1 SV=1	Q5TCZ7;Q9NTM9	1.8416	Q5TCZ7	CUTC	Copper homeostasis protein cutC homolog (Fragment)	14.6378	15.3481	15.0179	14.5333	14.1968	14.507	14.7551	14.8259	14.2333	13.7011	14.5174	14.9341	14.7908	14.1482	14.6218	0.458354	0.0379775	0.878731	14.5846	2.34491	-4.39112	0.0347696	0.0785183	0.324133	-0.0962436	0.74451	14.5846	1.65824	-5.51263	0.120133	0.21705	-0.249185	-0.669562	0.171192	14.5846	-1.27481	-6.10104	0.223715	0.402785	-0.380826	-0.801203	0.0395511	14.5846
3088	sp|P22102|PUR2_HUMAN Trifunctional purine biosynthetic protein adenosine-3 OS=Homo sapiens OX=9606 GN=GART PE=1 SV=1	P22102	109.56	P22102	GART	Trifunctional purine biosynthetic protein adenosine-3	20.7916	21.3902	21.2511	20.8446	20.6045	20.7483	21.1726	21.1087	20.6745	20.4257	20.8021	21.1529	21.0258	20.5208	20.9206	0.457933	0.20243	0.713437	20.8956	3.8545	-1.53576	0.00183946	0.010985	0.347871	0.0923677	0.603375	20.8956	2.92809	-3.32302	0.01129	0.0405891	-0.100689	-0.356192	0.154814	20.8956	-0.847517	-6.54466	0.411367	0.592079	-0.130398	-0.385902	0.125105	20.8956
5685	sp|Q9H0F6|SHRPN_HUMAN Sharpin OS=Homo sapiens OX=9606 GN=SHARPIN PE=1 SV=1	Q9H0F6	2.9439	Q9H0F6	SHARPIN	Sharpin	13.7944	14.374	14.3603	14.0546	13.4995	13.7515	14.117	14.1519	13.9687	13.3958	13.9545	14.3832	14.1092	13.7395	13.5849	0.457918	0.232896	0.68294	13.9493	4.37649	-0.534716	0.000675146	0.00589184	0.37363	0.148609	0.598652	13.9493	3.57092	-2.08761	0.00319833	0.0172639	0.0874501	-0.137572	0.312472	13.9493	0.835794	-6.55462	0.417706	0.598631	-0.340104	-0.565126	-0.115083	13.9493
3355	sp|P46109|CRKL_HUMAN Crk-like protein OS=Homo sapiens OX=9606 GN=CRKL PE=1 SV=1	P46109	44.853	P46109	CRKL	Crk-like protein	20.9308	21.6422	21.5154	21.1025	20.393	20.8835	21.2847	21.4353	20.9723	20.255	20.98	21.241	21.332	20.8804	20.7888	0.457863	0.178384	0.737342	21.0425	3.5233	-2.17664	0.00351106	0.0166678	0.496159	0.21668	0.775638	21.0425	3.81799	-1.6094	0.00197472	0.012548	0.0536327	-0.225846	0.333112	21.0425	0.412709	-6.82668	0.686249	0.806316	-0.452499	-0.731978	-0.17302	21.0425
1680	tr|F6TLX2|F6TLX2_HUMAN Glyoxalase domain-containing protein 4 OS=Homo sapiens OX=9606 GN=GLOD4 PE=1 SV=1;sp|Q9HC38|GLOD4_HUMAN Glyoxalase domain-containing protein 4 OS=Homo sapiens OX=9606 GN=GLOD4 PE=1 SV=1;tr|I3L3Q4|I3L3Q4_HUMAN Glyoxalase domain-contai	F6TLX2;Q9HC38;I3L3Q4	28.064	F6TLX2	GLOD4	Glyoxalase domain-containing protein 4	20.9654	21.6373	21.6949	21.3181	20.5845	20.9469	21.3457	21.521	21.2866	20.645	21.0194	21.3147	21.4396	21.1432	20.9717	0.455324	0.216289	0.694359	21.1889	4.09659	-1.06939	0.00115211	0.00818564	0.574557	0.335522	0.813592	21.1889	5.16933	0.935641	0.000155933	0.00256025	0.272064	0.0330293	0.511099	21.1889	2.44778	-4.28268	0.0286021	0.0976831	-0.243528	-0.482563	-0.00449336	21.1889
2503	sp|O60749|SNX2_HUMAN Sorting nexin-2 OS=Homo sapiens OX=9606 GN=SNX2 PE=1 SV=2	O60749	28.258	O60749	SNX2	Sorting nexin-2	19.7135	20.2784	20.1346	19.7778	19.0378	19.6395	20.11	20.0728	19.6327	18.8499	19.6428	19.9729	20.0232	19.7637	19.5466	0.455167	0.162884	0.74745	19.7464	3.34911	-2.51342	0.00494166	0.0204277	0.411609	0.119326	0.703893	19.7464	3.02862	-3.13204	0.00927236	0.0354152	0.0594713	-0.232812	0.351755	19.7464	0.437589	-6.81558	0.66855	0.795218	-0.520506	-0.812789	-0.228223	19.7464
5804	sp|Q9H8Y8|GORS2_HUMAN Golgi reassembly-stacking protein 2 OS=Homo sapiens OX=9606 GN=GORASP2 PE=1 SV=3	Q9H8Y8	23.855	Q9H8Y8	GORASP2	Golgi reassembly-stacking protein 2	19.4034	19.9429	19.6305	19.5646	18.6733	19.4101	19.744	19.6957	19.2959	18.6587	19.3069	19.7958	19.6241	19.3129	18.5928	0.454102	0.283876	0.624329	19.3768	5.73705	1.94468	5.742e-05	0.00135037	0.276618	0.106391	0.446845	19.3768	3.49474	-2.23509	0.0037132	0.018959	0.0176932	-0.152534	0.18792	19.3768	0.223533	-6.89014	0.826442	0.898334	-0.731853	-0.90208	-0.561626	19.3768
5455	sp|Q99598|TSNAX_HUMAN Translin-associated protein X OS=Homo sapiens OX=9606 GN=TSNAX PE=1 SV=1;tr|C4P0D6|C4P0D6_HUMAN Disrupted in schizophrenia 1 isoform 49 OS=Homo sapiens OX=9606 GN=TSNAX-DISC1 PE=2 SV=1;tr|C4P0D8|C4P0D8_HUMAN Disrupted in schizophrenia	Q99598;C4P0D6;C4P0D8;C4P0D4;Q5VVQ1	48.281	Q99598	TSNAX	Translin-associated protein X	20.4949	21.1047	20.8847	20.5848	19.9867	20.5042	20.9114	20.8903	20.5573	19.9119	20.5548	20.9	20.8478	20.6409	20.4916	0.454081	0.202241	0.705921	20.6177	3.87767	-1.49101	0.00175856	0.0107129	0.356298	0.104458	0.608139	20.6177	3.04265	-3.10529	0.00902069	0.0347879	0.0763563	-0.175484	0.328196	20.6177	0.652054	-6.69413	0.525229	0.687985	-0.387861	-0.639701	-0.136021	20.6177
792	tr|A0A6Q8PGF4|A0A6Q8PGF4_HUMAN Fanconi anemia group I protein OS=Homo sapiens OX=9606 GN=FANCI PE=1 SV=1;tr|A0A6Q8PH09|A0A6Q8PH09_HUMAN Fanconi anemia group I protein OS=Homo sapiens OX=9606 GN=FANCI PE=1 SV=1;sp|Q9NVI1|FANCI_HUMAN Fanconi anemia group I p	A0A6Q8PGF4;A0A6Q8PH09;Q9NVI1;F8W7R3;H3BP78	40.495	A0A6Q8PGF4	FANCI	Fanconi anemia group I protein	19.246	19.6229	19.5939	19.1771	20.0829	19.2451	19.7647	19.5083	19.45	20.0079	19.2697	19.7353	19.6293	19.4256	20.2628	0.454065	0.27152	0.63661	19.6014	5.34948	1.26231	0.00011303	0.00194472	0.323579	0.141034	0.506124	19.6014	3.81218	-1.62063	0.00199714	0.0125836	0.0973163	-0.0852284	0.279861	19.6014	1.14651	-6.24993	0.271345	0.458497	0.864312	0.681767	1.04686	19.6014
523	tr|A0A2R8Y4M1|A0A2R8Y4M1_HUMAN Chloride intracellular channel protein 5 OS=Homo sapiens OX=9606 GN=CLIC5 PE=1 SV=1;tr|A0A5F9ZHK1|A0A5F9ZHK1_HUMAN Chloride intracellular channel protein 5 OS=Homo sapiens OX=9606 GN=CLIC5 PE=1 SV=1;tr|A0A2R8YGW2|A0A2R8YGW2_H	A0A2R8Y4M1;A0A5F9ZHK1;A0A2R8YGW2;A0A2R8Y615;Q9NZA1;Q96NY7	3.1278	A0A2R8Y4M1	CLIC5	Chloride intracellular channel protein 5	14.5984	15.1237	15.4637	14.8938	14.2061	14.9108	15.209	15.1525	14.5956	13.7233	14.5101	15.0473	14.9269	14.2407	14.373	0.453583	0.0451096	0.862057	14.7317	2.38812	-4.31458	0.0320387	0.0743017	0.507925	0.0994518	0.916399	14.7317	2.67423	-3.79849	0.018508	0.0569829	-0.0963961	-0.50487	0.312078	14.7317	-0.507526	-6.78102	0.619912	0.760524	-0.572271	-0.980745	-0.163798	14.7317
379	tr|A0A0G2JH68|A0A0G2JH68_HUMAN Protein diaphanous homolog 1 OS=Homo sapiens OX=9606 GN=DIAPH1 PE=1 SV=1;sp|O60610|DIAP1_HUMAN Protein diaphanous homolog 1 OS=Homo sapiens OX=9606 GN=DIAPH1 PE=1 SV=2;tr|A0A2R8Y5N1|A0A2R8Y5N1_HUMAN Protein diaphanous homolog	A0A0G2JH68;O60610;A0A2R8Y5N1;A0A140T8Z0;H9KV28	97.54	A0A0G2JH68	DIAPH1	Protein diaphanous homolog 1	22.5247	23.1036	22.8865	22.568	21.8056	22.4782	22.8997	22.8121	22.2361	21.6323	22.5255	22.8859	22.7214	22.2332	22.388	0.453576	0.123684	0.783468	22.5134	2.95693	-3.26503	0.0106706	0.0340867	0.297199	-0.0326937	0.627091	22.5134	1.93748	-5.08355	0.0737257	0.151815	-0.16372	-0.493612	0.166172	22.5134	-1.06731	-6.33535	0.304401	0.491333	-0.567521	-0.897414	-0.237629	22.5134
6278	sp|Q9ULC4|MCTS1_HUMAN Malignant T-cell-amplified sequence 1 OS=Homo sapiens OX=9606 GN=MCTS1 PE=1 SV=1	Q9ULC4	15.019	Q9ULC4	MCTS1	Malignant T-cell-amplified sequence 1	19.6535	20.2595	20.2711	19.7945	19.0966	19.7777	20.244	20.1243	19.6708	18.8903	19.6492	19.9372	19.8769	19.566	19.4756	0.453428	0.149976	0.756879	19.7525	3.21352	-2.77468	0.00644991	0.0245135	0.397297	0.0938456	0.700749	19.7525	2.81572	-3.53484	0.01406	0.0473152	-0.0163797	-0.319831	0.287072	19.7525	-0.116086	-6.90949	0.90928	0.952993	-0.539333	-0.842784	-0.235881	19.7525
974	sp|A6NHL2|TBAL3_HUMAN Tubulin alpha chain-like 3 OS=Homo sapiens OX=9606 GN=TUBAL3 PE=1 SV=2	A6NHL2	6.1508	A6NHL2	TUBAL3	Tubulin alpha chain-like 3	14.1332	14.3377	15.0602	14.6271	14.14	14.5378	15.2196	14.7638	14.6296	13.5189	14.4192	14.8928	14.7409	13.9873	13.944	0.45333	-0.0392797	0.94594	14.4635	1.97913	-5.01267	0.0684035	0.128719	0.491603	-0.00100705	0.984213	14.4635	2.14622	-4.73859	0.050408	0.115407	0.0512808	-0.441329	0.543891	14.4635	0.22388	-6.89006	0.826177	0.898283	-0.495744	-0.988354	-0.0031339	14.4635
1040	sp|Q9UNN5|FAF1_HUMAN FAS-associated factor 1 OS=Homo sapiens OX=9606 GN=FAF1 PE=1 SV=2;tr|B1ANM7|B1ANM7_HUMAN FAS-associated factor 1 OS=Homo sapiens OX=9606 GN=FAF1 PE=1 SV=1;tr|B3KT28|B3KT28_HUMAN FAS-associated factor 1 OS=Homo sapiens OX=9606 GN=FAF1 P	Q9UNN5;B1ANM7;B3KT28	17.894	Q9UNN5	FAF1	FAS-associated factor 1	17.8428	18.4081	18.1768	17.8231	17.4996	17.7854	18.1811	18.1884	17.8408	17.5252	17.8023	18.201	18.063	17.8174	17.9953	0.453258	0.216772	0.689745	17.9433	4.12195	-1.02071	0.00109732	0.00798344	0.332533	0.0960462	0.569019	17.9433	3.02406	-3.14072	0.00935551	0.0354774	0.0169249	-0.219562	0.253411	17.9433	0.153916	-6.90407	0.879936	0.934079	-0.136795	-0.373282	0.0996911	17.9433
5675	sp|Q9GZT8|NIF3L_HUMAN NIF3-like protein 1 OS=Homo sapiens OX=9606 GN=NIF3L1 PE=1 SV=2;tr|E7EXA3|E7EXA3_HUMAN NIF3-like protein 1 (Fragment) OS=Homo sapiens OX=9606 GN=NIF3L1 PE=1 SV=1;tr|Q6X734|Q6X734_HUMAN NIF3-like protein 1 OS=Homo sapiens OX=9606 GN=NI	Q9GZT8;E7EXA3;Q6X734	25.244	Q9GZT8	NIF3L1	NIF3-like protein 1	17.7491	18.4917	18.3384	18.1387	17.1861	17.8766	18.1671	18.2071	17.9189	17.1176	17.9295	18.256	18.1854	18.0473	17.5004	0.453212	0.218697	0.687726	17.9407	4.15618	-0.955083	0.00102756	0.0075799	0.3919	0.157385	0.626415	17.9407	3.59392	-2.04309	0.00305757	0.0167615	0.183227	-0.0512877	0.417742	17.9407	1.68028	-5.55418	0.115704	0.260088	-0.583698	-0.818213	-0.349183	17.9407
5085	sp|Q8WW12|PCNP_HUMAN PEST proteolytic signal-containing nuclear protein OS=Homo sapiens OX=9606 GN=PCNP PE=1 SV=2	Q8WW12	20.558	Q8WW12	PCNP	PEST proteolytic signal-containing nuclear protein	20.0168	20.8112	20.4145	20.1931	19.5047	20.1529	20.2624	20.6439	19.6468	19.5494	20.1961	20.6518	20.2982	20.0013	20.3906	0.453186	-0.00796205	0.914334	20.1823	2.11348	-4.79035	0.0535444	0.107569	0.330252	-0.130896	0.7914	20.1823	1.54017	-5.68096	0.146448	0.250991	-0.17488	-0.636028	0.286268	20.1823	-0.815574	-6.57152	0.42879	0.607419	-0.307038	-0.768186	0.15411	20.1823
2694	sp|O95456|PSMG1_HUMAN Proteasome assembly chaperone 1 OS=Homo sapiens OX=9606 GN=PSMG1 PE=1 SV=1	O95456	22.907	O95456	PSMG1	Proteasome assembly chaperone 1	19.3897	19.9262	19.8297	19.3835	19.1455	19.4573	19.9059	19.7681	19.2831	18.9609	19.4525	19.8263	19.6529	19.0754	19.5182	0.452947	0.199756	0.706138	19.505	3.84735	-1.54958	0.0018652	0.0110972	0.317071	0.0638803	0.570262	19.505	2.69322	-3.76333	0.0178397	0.0554616	-0.185831	-0.439022	0.0673603	19.505	-1.57846	-5.70148	0.13742	0.2901	-0.224977	-0.478168	0.0282145	19.505
3716	sp|P78318|IGBP1_HUMAN Immunoglobulin-binding protein 1 OS=Homo sapiens OX=9606 GN=IGBP1 PE=1 SV=1	P78318	31.881	P78318	IGBP1	Immunoglobulin-binding protein 1	18.7554	19.3907	19.1588	18.7951	18.5813	18.7737	19.1582	19.1315	18.6766	18.5102	18.8283	19.167	19.0808	18.5376	18.9258	0.452829	0.229264	0.676393	18.8981	4.35606	-0.573543	0.000701822	0.00601262	0.337931	0.114366	0.561495	18.8981	3.25078	-2.70627	0.00599472	0.0261786	-0.11601	-0.339575	0.107554	18.8981	-1.11598	-6.28346	0.283751	0.472128	-0.113363	-0.336927	0.110202	18.8981
5440	sp|Q99471|PFD5_HUMAN Prefoldin subunit 5 OS=Homo sapiens OX=9606 GN=PFDN5 PE=1 SV=2	Q99471	13.279	Q99471	PFDN5	Prefoldin subunit 5	20.9377	21.5726	21.2549	20.9039	20.3897	20.807	21.1834	21.2651	20.6251	20.1863	20.8998	21.2466	21.1436	20.7291	20.8929	0.45275	0.130782	0.774717	20.9359	3.02419	-3.13716	0.00935324	0.0312069	0.339718	0.0177506	0.661686	20.9359	2.26918	-4.52731	0.0400949	0.0979602	-0.128789	-0.450756	0.193179	20.9359	-0.860258	-6.53369	0.40455	0.586644	-0.391833	-0.713801	-0.0698659	20.9359
4443	sp|Q5TZA2|CROCC_HUMAN Rootletin OS=Homo sapiens OX=9606 GN=CROCC PE=1 SV=1;tr|B1AKD8|B1AKD8_HUMAN Rootletin (Fragment) OS=Homo sapiens OX=9606 GN=CROCC PE=1 SV=2	Q5TZA2;B1AKD8	6.3739	Q5TZA2	CROCC	Rootletin	19.3063	20.0383	19.6141	19.1934	18.7295	19.4838	19.8309	19.5826	18.7968	18.2564	19.3418	19.6202	19.3994	18.7958	19.1741	0.452458	0.0524434	0.852473	19.2776	2.43257	-4.23528	0.0294434	0.0700173	0.154717	-0.245297	0.554732	19.2776	0.831814	-6.48227	0.419873	0.543267	-0.448654	-0.848669	-0.0486393	19.2776	-2.41212	-4.34667	0.0306115	0.102349	-0.657342	-1.05736	-0.257327	19.2776
1611	tr|F5GWE5|F5GWE5_HUMAN Phosphatidylinositol transfer protein alpha isoform OS=Homo sapiens OX=9606 GN=PITPNA PE=1 SV=1;sp|Q00169|PIPNA_HUMAN Phosphatidylinositol transfer protein alpha isoform OS=Homo sapiens OX=9606 GN=PITPNA PE=1 SV=2;tr|I3L4H1|I3L4H1_HU	F5GWE5;Q00169;I3L4H1	10.707	F5GWE5	PITPNA	Phosphatidylinositol transfer protein alpha isoform	19.0722	19.7308	19.839	19.4667	18.9776	19.2264	19.6671	19.7309	19.574	18.9402	19.2743	19.5319	19.5405	19.2344	19.277	0.452295	0.207323	0.697266	19.4056	3.97072	-1.31151	0.00146855	0.00955908	0.512499	0.267528	0.757471	19.4056	4.49925	-0.305101	0.000535449	0.00553442	0.234076	-0.010895	0.479048	19.4056	2.05497	-4.96437	0.0596061	0.164764	-0.126056	-0.371027	0.118916	19.4056
2933	sp|P11908|PRPS2_HUMAN Ribose-phosphate pyrophosphokinase 2 OS=Homo sapiens OX=9606 GN=PRPS2 PE=1 SV=2	P11908	20.065	P11908	PRPS2	Ribose-phosphate pyrophosphokinase 2	19.5496	20.083	20.1049	19.6371	19.4749	19.524	19.9749	19.9642	19.6803	19.2238	19.5262	19.8983	19.9812	19.3979	19.6956	0.452136	0.221405	0.682867	19.7144	4.2143	-0.843824	0.000919352	0.00711995	0.483521	0.25279	0.714252	19.7144	4.50684	-0.290786	0.000527865	0.0054917	0.0385493	-0.192182	0.269281	19.7144	0.359313	-6.84835	0.724876	0.832502	-0.0684564	-0.299188	0.162275	19.7144
1043	tr|B4DG22|B4DG22_HUMAN Non-specific serine/threonine protein kinase OS=Homo sapiens OX=9606 GN=RPS6KA3 PE=1 SV=1;tr|B1AXG1|B1AXG1_HUMAN Non-specific serine/threonine protein kinase OS=Homo sapiens OX=9606 GN=RPS6KA3 PE=1 SV=2;tr|B7ZB17|B7ZB17_HUMAN Non-spe	B4DG22;B1AXG1;B7ZB17;P51812	13.683	B4DG22	RPS6KA3	Non-specific serine/threonine protein kinase	17.0702	17.7085	17.5994	17.1244	16.6535	16.9618	17.4777	17.4143	17.1997	16.4893	17.1	17.2991	17.3707	17.07	17.0473	0.451119	0.171496	0.730743	17.1724	3.46961	-2.28053	0.0039008	0.017807	0.417474	0.137851	0.697098	17.1724	3.21084	-2.7831	0.00648394	0.0275773	0.0873677	-0.192256	0.366991	17.1724	0.671955	-6.68057	0.512861	0.678063	-0.313966	-0.593589	-0.0343425	17.1724
4394	tr|Q5T1Z0|Q5T1Z0_HUMAN Phospholysine phosphohistidine inorganic pyrophosphate phosphatase OS=Homo sapiens OX=9606 GN=LHPP PE=1 SV=1;sp|Q9H008|LHPP_HUMAN Phospholysine phosphohistidine inorganic pyrophosphate phosphatase OS=Homo sapiens OX=9606 GN=LHPP PE=1	Q5T1Z0;Q9H008	4.1488	Q5T1Z0	LHPP	Phospholysine phosphohistidine inorganic pyrophosphate phosphatase	14.5087	15.1376	15.4277	14.6689	13.364	14.4541	15.1802	15.2259	14.7803	12.8182	14.8982	14.8965	14.6851	14.7542	13.9082	0.451117	-0.0498862	0.95212	14.5805	1.93647	-5.08161	0.073859	0.135971	0.492595	-0.00840786	0.993598	14.5805	2.11452	-4.79213	0.053442	0.120662	0.114132	-0.386871	0.615135	14.5805	0.489924	-6.79018	0.631992	0.768972	-1.25685	-1.75785	-0.755849	14.5805
1845	tr|H0Y919|H0Y919_HUMAN Serine/threonine-protein kinase RIO2 (Fragment) OS=Homo sapiens OX=9606 GN=RIOK2 PE=1 SV=1;sp|Q9BVS4|RIOK2_HUMAN Serine/threonine-protein kinase RIO2 OS=Homo sapiens OX=9606 GN=RIOK2 PE=1 SV=2	H0Y919;Q9BVS4	7.4551	H0Y919	RIOK2	Serine/threonine-protein kinase RIO2 (Fragment)	15.4533	15.9827	15.8576	15.3103	15.3742	15.4626	15.9165	15.5358	15.1582	14.9782	15.3686	15.7377	15.5531	15.2486	14.9871	0.450795	0.205863	0.695727	15.4616	3.95819	-1.33565	0.00150455	0.00969432	0.220659	-0.0242727	0.465591	15.4616	1.93749	-5.08354	0.0737245	0.151815	-0.189108	-0.43404	0.0558237	15.4616	-1.66046	-5.58334	0.119681	0.266444	-0.314999	-0.559931	-0.0700668	15.4616
2595	sp|O75828|CBR3_HUMAN Carbonyl reductase [NADPH] 3 OS=Homo sapiens OX=9606 GN=CBR3 PE=1 SV=3	O75828	2.189	O75828	CBR3	Carbonyl reductase [NADPH] 3	17.0709	17.7304	17.889	17.4684	16.9987	17.0677	17.4749	17.7393	17.2313	16.8583	17.0603	17.3455	17.6027	17.3444	17.1304	0.45061	0.221965	0.679255	17.3341	4.2384	-0.797766	0.000877984	0.00690031	0.677351	0.448706	0.905996	17.3341	6.37111	3.0131	1.98319e-05	0.000664579	0.281686	0.0530409	0.510331	17.3341	2.64951	-3.9145	0.0194145	0.0740964	-0.0705351	-0.29918	0.15811	17.3341
2248	sp|O00410|IPO5_HUMAN Importin-5 OS=Homo sapiens OX=9606 GN=IPO5 PE=1 SV=4;tr|H0Y8C6|H0Y8C6_HUMAN Importin-5 (Fragment) OS=Homo sapiens OX=9606 GN=IPO5 PE=1 SV=1	O00410;H0Y8C6	107.26	O00410	IPO5	Importin-5	22.1398	22.6756	22.4269	22.1549	22.1785	22.137	22.5724	22.381	22.1698	22.1325	22.1456	22.5253	22.282	22.1243	22.5762	0.45033	0.242441	0.65822	22.3081	4.65867	-0.00257989	0.000397263	0.00432303	0.222504	0.0146146	0.430393	22.3081	2.3018	-4.47037	0.0377125	0.0936123	0.008876	-0.199013	0.216765	22.3081	0.0918224	-6.91217	0.928177	0.963126	0.154903	-0.0529861	0.362792	22.3081
3237	sp|P34896|GLYC_HUMAN Serine hydroxymethyltransferase, cytosolic OS=Homo sapiens OX=9606 GN=SHMT1 PE=1 SV=1	P34896	45.024	P34896	SHMT1	Serine hydroxymethyltransferase, cytosolic	19.937	20.6288	20.9004	20.3544	19.6745	20.0359	20.4717	20.8189	20.415	19.5015	20.0295	20.2527	20.7066	20.2546	19.8786	0.45027	0.222666	0.677874	20.2573	4.25457	-0.766876	0.000851295	0.00679968	0.807853	0.580249	1.03546	20.2573	7.63335	4.97249	2.81016e-06	0.000196132	0.340547	0.112943	0.568151	20.2573	3.21781	-2.83726	0.00639588	0.0335469	-0.315935	-0.543539	-0.0883306	20.2573
6505	sp|Q9Y6B6|SAR1B_HUMAN GTP-binding protein SAR1b OS=Homo sapiens OX=9606 GN=SAR1B PE=1 SV=1;tr|D6RD69|D6RD69_HUMAN GTP-binding protein SAR1b (Fragment) OS=Homo sapiens OX=9606 GN=SAR1B PE=1 SV=1;tr|Q9H029|Q9H029_HUMAN GTP-binding protein SAR1b OS=Homo sapie	Q9Y6B6;D6RD69;Q9H029	5.139	Q9Y6B6	SAR1B	GTP-binding protein SAR1b	15.937	16.4937	16.2282	16.0066	15.439	15.7914	16.3875	16.339	15.626	15.3049	15.8376	16.0353	15.9945	15.9257	15.8461	0.450191	0.122071	0.778311	15.9462	2.95071	-3.27681	0.0108011	0.0342089	0.331905	0.00378453	0.660025	15.9462	2.17542	-4.68891	0.0477553	0.111027	-0.00257314	-0.330693	0.325547	15.9462	-0.0168653	-6.9165	0.986789	0.994049	-0.32533	-0.65345	0.00278989	15.9462
6002	sp|Q9NVQ4|FAIM1_HUMAN Fas apoptotic inhibitory molecule 1 OS=Homo sapiens OX=9606 GN=FAIM PE=1 SV=1	Q9NVQ4	3.118	Q9NVQ4	FAIM	Fas apoptotic inhibitory molecule 1	16.8458	17.4982	17.3085	16.5095	16.4745	16.4857	17.1031	17.2669	16.6452	16.4102	16.9528	17.0335	17.0447	16.7002	16.9022	0.450143	0.114984	0.785302	16.8787	2.88844	-3.39462	0.0122	0.0370363	0.445259	0.110101	0.780418	16.8787	2.8571	-3.45706	0.0129699	0.0448313	-0.143151	-0.47831	0.192007	16.8787	-0.918561	-6.48162	0.374322	0.559768	-0.165772	-0.500931	0.169386	16.8787
2732	sp|O95861|BPNT1_HUMAN 3(2),5-bisphosphate nucleotidase 1 OS=Homo sapiens OX=9606 GN=BPNT1 PE=1 SV=1;tr|A6NF51|A6NF51_HUMAN 3(2),5-bisphosphate nucleotidase 1 OS=Homo sapiens OX=9606 GN=BPNT1 PE=1 SV=2;tr|F8VZG4|F8VZG4_HUMAN 3(2),5-bisphosphate nuc	O95861;A6NF51;F8VZG4;F8W1J0	24.888	O95861	BPNT1	3(2),5-bisphosphate nucleotidase 1	19.6149	20.2373	20.2563	19.8207	19.2323	19.6199	19.9901	20.1524	19.822	19.024	19.5514	19.909	19.9722	19.7502	19.3645	0.450048	0.230424	0.669672	19.7545	4.40699	-0.476844	0.000637266	0.00574198	0.531522	0.311898	0.751146	19.7545	5.2048	0.999808	0.00014631	0.00250432	0.202188	-0.0174358	0.421812	19.7545	1.97988	-5.08797	0.068311	0.181313	-0.388494	-0.608118	-0.16887	19.7545
5560	sp|Q9BU89|DOHH_HUMAN Deoxyhypusine hydroxylase OS=Homo sapiens OX=9606 GN=DOHH PE=1 SV=1;tr|A0A5F9ZGM7|A0A5F9ZGM7_HUMAN Deoxyhypusine hydroxylase (Fragment) OS=Homo sapiens OX=9606 GN=DOHH PE=1 SV=1	Q9BU89;A0A5F9ZGM7	28.311	Q9BU89	DOHH	Deoxyhypusine hydroxylase	17.877	18.6359	18.3122	17.7723	17.3052	17.8636	18.2009	18.2857	17.3851	17.2281	17.9636	18.2167	18.0434	17.3671	17.9421	0.449746	0.0715126	0.827979	17.8933	2.55723	-4.00997	0.0231949	0.0590871	0.312362	-0.0658707	0.690595	17.8933	1.77608	-5.33656	0.0980759	0.187073	-0.393202	-0.771435	-0.0149693	17.8933	-2.23573	-4.65738	0.0426848	0.129812	-0.409638	-0.787871	-0.0314052	17.8933
4138	sp|Q15185|TEBP_HUMAN Prostaglandin E synthase 3 OS=Homo sapiens OX=9606 GN=PTGES3 PE=1 SV=1;tr|A0A087WYT3|A0A087WYT3_HUMAN Prostaglandin E synthase 3 OS=Homo sapiens OX=9606 GN=PTGES3 PE=1 SV=1;tr|B4DDC6|B4DDC6_HUMAN Prostaglandin E synthase 3 OS=Homo sapi	Q15185;A0A087WYT3;B4DDC6	32.854	Q15185	PTGES3	Prostaglandin E synthase 3	23.2968	23.9124	23.9087	23.3835	22.6321	23.4635	23.9026	23.8382	23.2928	22.418	23.3991	23.6928	23.6213	23.2401	23.3524	0.449485	0.0724485	0.826522	23.4236	2.56386	-3.99788	0.0229011	0.0585497	0.402958	0.0259209	0.779994	23.4236	2.29847	-4.47621	0.0379498	0.094128	-0.080989	-0.458026	0.296048	23.4236	-0.461961	-6.8041	0.651409	0.783759	-0.585628	-0.962665	-0.208591	23.4236
3412	sp|P49589|SYCC_HUMAN Cysteine--tRNA ligase, cytoplasmic OS=Homo sapiens OX=9606 GN=CARS1 PE=1 SV=3;tr|B4DKY1|B4DKY1_HUMAN Cysteinyl-tRNA synthetase OS=Homo sapiens OX=9606 GN=CARS1 PE=1 SV=1	P49589;B4DKY1	39.657	P49589	CARS1	Cysteine--tRNA ligase, cytoplasmic	21.0728	21.6244	21.4165	21.1521	20.5812	20.9738	21.4293	21.4001	21.1357	20.5649	21.0883	21.4287	21.2443	20.7738	20.6767	0.449131	0.237431	0.66083	21.1042	4.56263	-0.182814	0.000475362	0.00479864	0.308644	0.0969445	0.520344	21.1042	3.13546	-2.92782	0.00751871	0.0305109	-0.0244583	-0.236158	0.187241	21.1042	-0.248467	-6.88391	0.807484	0.88812	-0.437391	-0.64909	-0.225691	21.1042
5928	sp|Q9NRF8|PYRG2_HUMAN CTP synthase 2 OS=Homo sapiens OX=9606 GN=CTPS2 PE=1 SV=1	Q9NRF8	10.395	Q9NRF8	CTPS2	CTP synthase 2	15.871	16.3512	16.2457	15.9153	15.6474	15.7484	16.1797	16.2358	15.8381	15.3938	15.7805	16.2141	15.9252	15.7976	15.5524	0.448333	0.247085	0.649582	15.9131	4.79106	0.244256	0.000310752	0.0037185	0.335598	0.13435	0.536847	15.9131	3.58633	-2.05777	0.00310329	0.0169311	0.0503223	-0.150926	0.251571	15.9131	0.537763	-6.76455	0.599426	0.745739	-0.26882	-0.470068	-0.0675713	15.9131
3364	sp|P46926|GNPI1_HUMAN Glucosamine-6-phosphate isomerase 1 OS=Homo sapiens OX=9606 GN=GNPDA1 PE=1 SV=1;tr|D6RAY7|D6RAY7_HUMAN Glucosamine-6-phosphate isomerase (Fragment) OS=Homo sapiens OX=9606 GN=GNPDA1 PE=1 SV=1;tr|D6R9P4|D6R9P4_HUMAN Glucosamine-6-phosp	P46926;D6RAY7;D6R9P4;D6RFF8	22.373	P46926	GNPDA1	Glucosamine-6-phosphate isomerase 1	21.5253	22.1451	22.2508	21.8591	20.8306	21.62	22.0469	22.1361	21.7037	20.5466	21.6574	21.9557	22.0644	21.6981	21.5587	0.44832	0.0632264	0.833413	21.7066	2.50371	-4.10719	0.0257031	0.0634456	0.549552	0.164459	0.934646	21.7066	3.06906	-3.05487	0.00856523	0.0335186	0.152729	-0.232364	0.537823	21.7066	0.852941	-6.54001	0.408456	0.590222	-0.622251	-1.00734	-0.237158	21.7066
4407	sp|Q5T4F4|ZFY27_HUMAN Protrudin OS=Homo sapiens OX=9606 GN=ZFYVE27 PE=1 SV=1	Q5T4F4	3.7142	Q5T4F4	ZFYVE27	Protrudin	9.67005	NA	8.77159	9.08607	9.3067	9.16875	NA	9.52752	9.34341	9.60992	NA	9.86682	9.21683	9.6299	9.07935	0.447418	-0.273549	1.16839	9.35641	1.37209	-5.51573	0.198355	0.28975	-0.247423	-0.784801	0.289954	9.35641	-1.018	-6.19711	0.331338	0.454956	-0.0662797	-0.603657	0.471098	9.35641	-0.272701	-6.76623	0.790319	0.875855	-0.0874158	-0.624793	0.449962	9.35641
5518	sp|Q9BRX5|PSF3_HUMAN DNA replication complex GINS protein PSF3 OS=Homo sapiens OX=9606 GN=GINS3 PE=1 SV=1	Q9BRX5	22.439	Q9BRX5	GINS3	DNA replication complex GINS protein PSF3	18.8708	19.4674	19.2726	18.5753	18.5293	18.7612	19.2619	19.1988	18.5007	18.4491	18.8955	19.1392	19.1755	18.6154	19.081	0.446979	0.160706	0.733251	18.9196	3.35792	-2.49642	0.00485696	0.0202485	0.373128	0.0868551	0.6594	18.9196	2.80311	-3.55848	0.0144096	0.0482015	-0.278731	-0.565004	0.00754114	18.9196	-2.09396	-4.89923	0.0555	0.156333	-0.15603	-0.442303	0.130242	18.9196
38	tr|Q5RIB5|Q5RIB5_HUMAN COBW domain-containing protein 3 OS=Homo sapiens OX=9606 GN=CBWD5 PE=4 SV=1;tr|F2Z2T4|F2Z2T4_HUMAN COBW domain-containing protein 1 OS=Homo sapiens OX=9606 GN=CBWD1 PE=1 SV=1;tr|A0A0A0MRU4|A0A0A0MRU4_HUMAN COBW domain-containing prot	Q5RIB5;F2Z2T4;A0A0A0MRU4;Q5RIB0;H0Y5V3;C9J3G2;A0A0A6YYH9;A0A087WWG3;A0A087WTC0;A0A087X140;E7EUZ7;A0A087WYD2;F8WEU0;Q6NVZ8;F8WEG4;A0A0B4J2E3;A0A087WZQ3;Q5JTY2;Q5JTY5;Q5RIA9;Q8IUF1;Q4V339;Q9BRT8	5.1897	Q5RIB5	CBWD5	COBW domain-containing protein 3	15.7155	16.3748	16.2644	15.5358	15.2998	15.5986	16.126	16.0455	15.5114	15.1081	15.6693	15.8229	15.9375	15.5323	15.5863	0.446722	0.153607	0.739837	15.7419	3.27764	-2.65126	0.00568651	0.0225127	0.421292	0.128177	0.714407	15.7419	3.09106	-3.01282	0.00820339	0.0324013	-0.134662	-0.427778	0.158453	15.7419	-0.988032	-6.41566	0.340382	0.527994	-0.329767	-0.622882	-0.0366514	15.7419
3049	sp|P19623|SPEE_HUMAN Spermidine synthase OS=Homo sapiens OX=9606 GN=SRM PE=1 SV=1	P19623	18.437	P19623	SRM	Spermidine synthase	17.6127	18.2662	17.8174	17.4626	17.2979	17.6473	18.0134	17.7334	17.3317	17.1344	17.7116	18.032	17.531	17.2062	17.5567	0.446644	0.204192	0.689096	17.6236	3.96185	-1.3286	0.00149394	0.00965526	0.0367289	-0.205723	0.279181	17.6236	0.325796	-6.78424	0.749535	0.824372	-0.323692	-0.566144	-0.0812404	17.6236	-2.87124	-3.49974	0.0126167	0.0549748	-0.327505	-0.569957	-0.0850528	17.6236
5478	sp|Q99961|SH3G1_HUMAN Endophilin-A2 OS=Homo sapiens OX=9606 GN=SH3GL1 PE=1 SV=1;tr|M0QYE0|M0QYE0_HUMAN Endophilin-A2 (Fragment) OS=Homo sapiens OX=9606 GN=SH3GL1 PE=1 SV=8;tr|M0R0I3|M0R0I3_HUMAN Endophilin-A2 (Fragment) OS=Homo sapiens OX=9606 GN=SH3GL1 PE	Q99961;M0QYE0;M0R0I3	33.102	Q99961	SH3GL1	Endophilin-A2	20.1247	20.822	20.62	20.2227	19.607	20.1775	20.4821	20.6774	19.9544	19.5184	20.1443	20.4823	20.4514	19.8761	19.957	0.446594	0.174183	0.719006	20.2078	3.52574	-2.17191	0.00349428	0.0166128	0.434085	0.161674	0.706496	20.2078	3.42699	-2.36617	0.00424105	0.0206759	-0.131137	-0.403548	0.141275	20.2078	-1.03529	-6.36843	0.318584	0.505509	-0.454752	-0.727164	-0.182341	20.2078
5923	sp|Q9NR45|SIAS_HUMAN Sialic acid synthase OS=Homo sapiens OX=9606 GN=NANS PE=1 SV=2	Q9NR45	21.64	Q9NR45	NANS	Sialic acid synthase	20.8851	21.4743	21.1199	20.6283	20.2153	20.782	21.2084	21.0509	20.5232	19.9303	20.7587	21.0828	20.9466	20.4958	20.4202	0.446573	0.193411	0.699736	20.7681	3.79364	-1.65339	0.00207049	0.0118555	0.230479	-0.0226834	0.483641	20.7681	1.95792	-5.05061	0.0710684	0.148261	-0.259512	-0.512674	-0.0063498	20.7681	-2.20456	-4.7112	0.0452391	0.135398	-0.620002	-0.873164	-0.366839	20.7681
5901	sp|Q9NQ88|TIGAR_HUMAN Fructose-2,6-bisphosphatase TIGAR OS=Homo sapiens OX=9606 GN=TIGAR PE=1 SV=1	Q9NQ88	12.224	Q9NQ88	TIGAR	Fructose-2,6-bisphosphatase TIGAR	18.5067	19.1512	18.9412	18.3431	17.5249	18.4833	18.835	18.7959	18.0055	17.2132	18.3932	18.7358	18.5948	17.8869	17.6996	0.446264	0.1294	0.763128	18.3407	3.02888	-3.12822	0.00926756	0.0310022	0.316221	-0.00064287	0.633085	18.3407	2.14625	-4.73853	0.0504049	0.115407	-0.382605	-0.699469	-0.0657414	18.3407	-2.59682	-4.01163	0.0214934	0.0795189	-0.981836	-1.2987	-0.664972	18.3407
904	tr|A0A7P0T9J0|A0A7P0T9J0_HUMAN 2-5-oligoadenylate synthase 3 OS=Homo sapiens OX=9606 GN=OAS3 PE=4 SV=1;sp|Q9Y6K5|OAS3_HUMAN 2-5-oligoadenylate synthase 3 OS=Homo sapiens OX=9606 GN=OAS3 PE=1 SV=3;tr|A0A7P0T9W6|A0A7P0T9W6_HUMAN 2-5-oligoadenylate synt	A0A7P0T9J0;Q9Y6K5;A0A7P0T9W6;A0A7P0TAU8;A0A7P0Z4F1;A0A7P0Z4D0;A0A7P0T8S7;A0A7P0TAC0;A0A7P0Z4F5;A0A7P0T7V2;A0A7P0TAS0;A0A7P0TB73	106.03	A0A7P0T9J0	OAS3	2-5-oligoadenylate synthase 3	23.1602	23.625	23.7555	23.0587	21.4788	23.163	23.665	23.5707	22.3493	20.8766	23.2147	23.5866	23.4894	22.0833	21.2771	0.446261	0.0241422	0.868381	22.8236	2.27362	-4.51609	0.039763	0.0862458	0.425906	0.00378717	0.848026	22.8236	2.16991	-4.69831	0.0482457	0.111783	-0.682162	-1.10428	-0.260042	22.8236	-3.47548	-2.33847	0.00385613	0.0232905	-1.96845	-2.39057	-1.54633	22.8236
1009	tr|A8MZF9|A8MZF9_HUMAN Developmentally-regulated GTP-binding protein 2 OS=Homo sapiens OX=9606 GN=DRG2 PE=1 SV=1;sp|P55039|DRG2_HUMAN Developmentally-regulated GTP-binding protein 2 OS=Homo sapiens OX=9606 GN=DRG2 PE=1 SV=1	A8MZF9;P55039	11.743	A8MZF9	DRG2	Developmentally-regulated GTP-binding protein 2	18.4447	19.0179	18.8697	18.4397	17.7834	18.3834	18.8135	18.7218	18.2384	17.5109	18.4013	18.735	18.6125	18.1218	18.0311	0.445631	0.179374	0.711888	18.4083	3.59945	-2.02921	0.00302463	0.0151592	0.324866	0.0586086	0.591123	18.4083	2.62401	-3.89112	0.0203951	0.0610055	-0.143202	-0.409459	0.123056	18.4083	-1.15667	-6.23861	0.267312	0.453788	-0.634701	-0.900958	-0.368443	18.4083
1177	tr|F8WBT4|F8WBT4_HUMAN Ribulose-phosphate 3-epimerase OS=Homo sapiens OX=9606 GN=RPE PE=1 SV=1;tr|C9J9T0|C9J9T0_HUMAN Ribulose-phosphate 3-epimerase OS=Homo sapiens OX=9606 GN=RPE PE=1 SV=1;tr|C9IZU8|C9IZU8_HUMAN Ribulose-phosphate 3-epimerase OS=Homo sapi	F8WBT4;C9J9T0;C9IZU8;Q96AT9	13.891	F8WBT4	RPE	Ribulose-phosphate 3-epimerase	14.869	15.3457	15.8331	15.012	14.5856	15.1896	15.7159	15.7493	14.9482	13.579	14.9968	15.3301	15.3675	14.6614	13.307	0.445469	-0.0963857	0.987323	14.966	1.76806	-5.34519	0.099454	0.170696	0.631533	0.0896791	1.17339	14.966	2.50655	-4.10551	0.0255638	0.0712256	-0.144554	-0.686408	0.3973	14.966	-0.573734	-6.74378	0.575509	0.725714	-1.19457	-1.73642	-0.652712	14.966
5963	sp|Q9NTJ3|SMC4_HUMAN Structural maintenance of chromosomes protein 4 OS=Homo sapiens OX=9606 GN=SMC4 PE=1 SV=2;tr|E9PD53|E9PD53_HUMAN Structural maintenance of chromosomes protein OS=Homo sapiens OX=9606 GN=SMC4 PE=1 SV=1	Q9NTJ3;E9PD53	100.4	Q9NTJ3	SMC4	Structural maintenance of chromosomes protein 4	22.6122	23.1088	22.9374	22.6098	22.948	22.5454	23.0197	22.9315	22.5723	22.9385	22.638	23.0032	22.8623	22.5089	23.1814	0.445358	0.29085	0.599865	22.8278	6.19901	2.73027	2.63203e-05	0.000902996	0.311849	0.157341	0.466357	22.8278	4.34068	-0.605685	0.000722612	0.00660427	-0.0348936	-0.189401	0.119614	22.8278	-0.48569	-6.79234	0.634915	0.771643	0.424101	0.269594	0.578609	22.8278
5357	sp|Q96LR5|UB2E2_HUMAN Ubiquitin-conjugating enzyme E2 E2 OS=Homo sapiens OX=9606 GN=UBE2E2 PE=1 SV=1;tr|F8WF15|F8WF15_HUMAN Ubiquitin-conjugating enzyme E2 E2 OS=Homo sapiens OX=9606 GN=UBE2E2 PE=1 SV=1;tr|F8W8F0|F8W8F0_HUMAN Ubiquitin-conjugating enzyme E	Q96LR5;F8WF15;F8W8F0;C9J180	12.721	Q96LR5	UBE2E2	Ubiquitin-conjugating enzyme E2 E2	16.7456	17.3673	17.212	16.6438	16.6699	16.8309	17.2218	17.0772	16.6051	16.5749	16.7661	17.0877	17.1295	16.6723	16.8084	0.444758	0.27316	0.616357	16.8942	5.57409	1.66029	7.61455e-05	0.0015487	0.358683	0.187085	0.530282	16.8942	4.49532	-0.312533	0.00053943	0.00554854	-0.140441	-0.31204	0.0311574	16.8942	-1.76013	-5.43451	0.100835	0.235999	-0.096422	-0.268021	0.0751765	16.8942
3218	sp|P31948|STIP1_HUMAN Stress-induced-phosphoprotein 1 OS=Homo sapiens OX=9606 GN=STIP1 PE=1 SV=1	P31948	79.433	P31948	STIP1	Stress-induced-phosphoprotein 1	23.7784	24.3396	24.1193	23.924	23.4765	23.8644	24.2036	24.2056	23.7471	23.413	23.758	24.1908	23.9257	23.6323	23.969	0.444381	0.167925	0.720838	23.9031	3.45694	-2.30504	0.00399896	0.0180577	0.283283	0.00682635	0.559739	23.9031	2.20372	-4.64047	0.0453097	0.107204	-0.0324946	-0.308951	0.243962	23.9031	-0.252782	-6.88277	0.804215	0.88621	-0.180784	-0.45724	0.095673	23.9031
3369	sp|P46976|GLYG_HUMAN Glycogenin-1 OS=Homo sapiens OX=9606 GN=GYG1 PE=1 SV=4;tr|C9JQ42|C9JQ42_HUMAN Glycogenin-1 (Fragment) OS=Homo sapiens OX=9606 GN=GYG1 PE=1 SV=8;tr|G5E9W8|G5E9W8_HUMAN Glycogenin 1, isoform CRA_e OS=Homo sapiens OX=9606 GN=GYG1 PE=1 SV=	P46976;C9JQ42;G5E9W8	44.523	P46976	GYG1	Glycogenin-1	21.3398	21.9668	21.9935	21.8194	20.6833	21.477	21.7889	21.8962	21.3471	20.5403	21.431	21.8247	21.7574	21.2544	21.115	0.444193	0.119211	0.769175	21.4823	2.93951	-3.29804	0.0110405	0.0346738	0.466443	0.141461	0.791425	21.4823	3.08676	-3.02105	0.00827297	0.0325349	0.0577173	-0.267265	0.382699	21.4823	0.381953	-6.83952	0.708395	0.821448	-0.636396	-0.961378	-0.311414	21.4823
5600	sp|Q9BWH6|RPAP1_HUMAN RNA polymerase II-associated protein 1 OS=Homo sapiens OX=9606 GN=RPAP1 PE=1 SV=3;tr|H3BRE8|H3BRE8_HUMAN RNA polymerase II-associated protein 1 OS=Homo sapiens OX=9606 GN=RPAP1 PE=1 SV=1	Q9BWH6;H3BRE8	7.9017	Q9BWH6	RPAP1	RNA polymerase II-associated protein 1	15.5762	16.055	15.8851	15.6711	15.6179	15.4182	16.0387	16.0682	15.669	15.5047	15.6576	15.8908	15.7854	15.4071	15.6297	0.444186	0.236397	0.651976	15.725	4.59732	-0.117618	0.000445474	0.0046338	0.362233	0.154443	0.570023	15.725	3.7491	-1.74265	0.00225813	0.013615	0.0317507	-0.176039	0.23954	15.725	0.328619	-6.85948	0.747446	0.848349	0.0334692	-0.174321	0.241259	15.725
1212	sp|Q9Y5L0|TNPO3_HUMAN Transportin-3 OS=Homo sapiens OX=9606 GN=TNPO3 PE=1 SV=3;tr|C9J7E5|C9J7E5_HUMAN Transportin-3 OS=Homo sapiens OX=9606 GN=TNPO3 PE=1 SV=1;tr|E9PFH4|E9PFH4_HUMAN Transportin-3 OS=Homo sapiens OX=9606 GN=TNPO3 PE=1 SV=1	Q9Y5L0;C9J7E5;E9PFH4	10.848	Q9Y5L0	TNPO3	Transportin-3	17.1051	17.525	17.3126	17.1927	16.9021	16.9128	17.3863	17.4132	17.2409	16.7954	17.0748	17.5127	17.3347	17.0866	17.1497	0.443785	0.25036	0.637209	17.1963	4.93428	0.509037	0.000238829	0.00316088	0.322647	0.129223	0.516072	17.1963	3.5874	-2.05571	0.00309681	0.016918	0.142529	-0.050895	0.335954	17.1963	1.58473	-5.69258	0.135986	0.28837	-0.0818023	-0.275227	0.111622	17.1963
2728	sp|O95817|BAG3_HUMAN BAG family molecular chaperone regulator 3 OS=Homo sapiens OX=9606 GN=BAG3 PE=1 SV=3	O95817	85.962	O95817	BAG3	BAG family molecular chaperone regulator 3	20.9441	21.5324	21.4334	21.4088	20.0705	21.1013	21.2775	21.5109	20.9398	20.2676	20.8358	21.4021	21.3027	21.0137	20.996	0.443566	0.0339243	0.853208	21.0691	2.32872	-4.41964	0.0358484	0.0802146	0.455248	0.045606	0.864889	21.0691	2.39005	-4.31463	0.0319217	0.0836401	0.160324	-0.249318	0.569965	21.0691	0.841698	-6.54962	0.414506	0.594982	-0.51571	-0.925352	-0.106068	21.0691
2868	sp|P09211|GSTP1_HUMAN Glutathione S-transferase P OS=Homo sapiens OX=9606 GN=GSTP1 PE=1 SV=2;tr|A8MX94|A8MX94_HUMAN GST class-pi OS=Homo sapiens OX=9606 GN=GSTP1 PE=1 SV=1	P09211;A8MX94	85.113	P09211	GSTP1	Glutathione S-transferase P	24.0603	24.7651	24.922	24.5241	23.7151	24.2135	24.5811	24.7889	24.4581	23.3983	24.154	24.4114	24.5553	24.1444	23.9962	0.443262	0.123043	0.763481	24.3125	2.97699	-3.22695	0.0102596	0.0332548	0.612812	0.292593	0.933031	24.3125	4.1157	-1.03568	0.00111056	0.00869355	0.23294	-0.0872788	0.553158	24.3125	1.56444	-5.72126	0.140666	0.294839	-0.439377	-0.759596	-0.119158	24.3125
3608	sp|P61081|UBC12_HUMAN NEDD8-conjugating enzyme Ubc12 OS=Homo sapiens OX=9606 GN=UBE2M PE=1 SV=1	P61081	15.305	P61081	UBE2M	NEDD8-conjugating enzyme Ubc12	19.6983	20.3051	20.26	19.8248	19.2432	19.724	20.1244	20.1885	19.7099	18.901	19.7785	20.0996	20.1311	19.6851	19.7072	0.442768	0.133078	0.752457	19.8254	3.07477	-3.04066	0.00846993	0.029248	0.459579	0.149889	0.769269	19.8254	3.19151	-2.82026	0.00673492	0.0282299	0.00628864	-0.303401	0.315978	19.8254	0.0436709	-6.91564	0.965801	0.98294	-0.449802	-0.759492	-0.140112	19.8254
4566	sp|Q6PJG6|BRAT1_HUMAN BRCA1-associated ATM activator 1 OS=Homo sapiens OX=9606 GN=BRAT1 PE=1 SV=2	Q6PJG6	18.613	Q6PJG6	BRAT1	BRCA1-associated ATM activator 1	16.6992	17.2934	17.1388	16.705	16.5256	16.633	17.02	17.0717	16.5567	16.3633	16.7086	17.0556	17.0909	16.6899	17.4298	0.442717	0.0245832	0.860851	16.8654	2.27706	-4.5101	0.0395072	0.0858664	0.420203	0.00206942	0.838337	16.8654	2.16126	-4.71304	0.049025	0.113241	-0.0297633	-0.447897	0.388371	16.8654	-0.153084	-6.90421	0.880579	0.934167	0.0925773	-0.325557	0.510711	16.8654
2206	tr|M0R0F9|M0R0F9_HUMAN Cdc42-interacting protein 4 OS=Homo sapiens OX=9606 GN=TRIP10 PE=1 SV=1;tr|W4VSQ9|W4VSQ9_HUMAN Cdc42-interacting protein 4 OS=Homo sapiens OX=9606 GN=TRIP10 PE=1 SV=1;sp|Q15642|CIP4_HUMAN Cdc42-interacting protein 4 OS=Homo sapiens O	M0R0F9;W4VSQ9;Q15642	7.7723	M0R0F9	TRIP10	Cdc42-interacting protein 4	14.8952	15.4909	14.9403	14.8754	13.9122	14.7965	15.1862	15.1985	14.4768	14.1234	14.8196	15.1602	14.7247	13.9858	14.0695	0.442008	0.0568944	0.827122	14.7104	2.46834	-4.17106	0.0275022	0.0669007	0.117405	-0.267709	0.502519	14.7104	0.655632	-6.61579	0.522992	0.6373	-0.391083	-0.776196	-0.00596881	14.7104	-2.18395	-4.74659	0.0470057	0.139163	-0.802064	-1.18718	-0.416951	14.7104
6074	sp|Q9NZ63|TLS1_HUMAN Telomere length and silencing protein 1 homolog OS=Homo sapiens OX=9606 GN=C9orf78 PE=1 SV=1	Q9NZ63	3.2311	Q9NZ63	C9orf78	Telomere length and silencing protein 1 homolog	17.0897	17.6198	17.6164	17.1257	17.167	17.317	17.7396	17.5135	16.8843	17.1039	17.3844	17.7573	17.4856	17.0758	17.7819	0.441874	0.13001	0.753738	17.3775	3.04717	-3.09335	0.00894113	0.0303407	0.274754	-0.0371101	0.586617	17.3775	1.8947	-5.15186	0.0795812	0.160753	-0.235115	-0.546979	0.0767485	17.3775	-1.62136	-5.64018	0.127875	0.277738	0.0872566	-0.224607	0.39912	17.3775
2462	sp|O60256|KPRB_HUMAN Phosphoribosyl pyrophosphate synthase-associated protein 2 OS=Homo sapiens OX=9606 GN=PRPSAP2 PE=1 SV=1;tr|E7EPA1|E7EPA1_HUMAN Phosphoribosyl pyrophosphate synthase-associated protein 2 (Fragment) OS=Homo sapiens OX=9606 GN=PRPSAP2 PE=	O60256;E7EPA1;C9JJS3;C9K0K7;C9JDU5;I3L0S1	14.857	O60256	PRPSAP2	Phosphoribosyl pyrophosphate synthase-associated protein 2	20.105	20.7524	20.5311	20.2889	19.6825	20.1041	20.4537	20.5904	20.1818	19.6017	20.1831	20.5116	20.4771	19.9988	20.1799	0.441803	0.161132	0.722474	20.2428	3.38528	-2.44358	0.00460291	0.0196081	0.40211	0.121439	0.682781	20.2428	3.08113	-3.03181	0.00836479	0.0328352	0.0257408	-0.25493	0.306412	20.2428	0.197236	-6.896	0.846558	0.913267	-0.309368	-0.590039	-0.0286967	20.2428
5958	sp|Q9NSK0|KLC4_HUMAN Kinesin light chain 4 OS=Homo sapiens OX=9606 GN=KLC4 PE=1 SV=3	Q9NSK0	31.711	Q9NSK0	KLC4	Kinesin light chain 4	17.823	18.3459	18.3138	17.9599	16.9797	17.851	18.2814	18.2342	17.6868	16.8381	17.7344	18.1057	18.0833	17.6672	17.3268	0.441549	0.183631	0.699466	17.8154	3.6818	-1.86979	0.00257493	0.0137175	0.407615	0.149697	0.665533	17.8154	3.39885	-2.42057	0.00448188	0.0215856	-0.0315026	-0.28942	0.226415	17.8154	-0.262681	-6.88007	0.796732	0.880708	-0.754603	-1.01252	-0.496686	17.8154
5776	sp|Q9H6S3|ES8L2_HUMAN Epidermal growth factor receptor kinase substrate 8-like protein 2 OS=Homo sapiens OX=9606 GN=EPS8L2 PE=1 SV=2;tr|A0A3B3ISQ4|A0A3B3ISQ4_HUMAN Epidermal growth factor receptor kinase substrate 8-like protein 2 OS=Homo sapiens OX=9606 G	Q9H6S3;A0A3B3ISQ4	27.844	Q9H6S3	EPS8L2	Epidermal growth factor receptor kinase substrate 8-like protein 2	19.9835	20.6112	20.2268	19.8819	19.6872	19.9932	20.3591	20.2587	19.68	19.5792	19.9925	20.3228	20.0624	19.4497	19.6285	0.441282	0.218635	0.66393	19.9811	4.26248	-0.751789	0.000838557	0.00674788	0.19292	-0.0297271	0.415567	19.9811	1.86347	-5.20117	0.0841186	0.166693	-0.31919	-0.541837	-0.0965427	19.9811	-3.08315	-3.09621	0.00833172	0.0406746	-0.358073	-0.58072	-0.135425	19.9811
6284	sp|Q9ULH7|MRTFB_HUMAN Myocardin-related transcription factor B OS=Homo sapiens OX=9606 GN=MRTFB PE=1 SV=3	Q9ULH7	5.5949	Q9ULH7	MRTFB	Myocardin-related transcription factor B	12.8503	13.3303	13.153	13.1718	12.7715	12.8835	13.4901	13.2534	13.0849	12.7447	13.1195	13.355	13.2788	13.0086	13.3157	0.44073	0.165006	0.716454	13.1208	3.43765	-2.34235	0.00415325	0.0184264	0.277323	0.00159863	0.553046	13.1208	2.16309	-4.70994	0.0488596	0.112918	0.137317	-0.138407	0.413041	13.1208	1.07106	-6.33143	0.302775	0.4902	-0.00713011	-0.282854	0.268594	13.1208
158	tr|Q2TAM5|Q2TAM5_HUMAN RELA protein OS=Homo sapiens OX=9606 GN=RELA PE=1 SV=1;tr|E9PKH5|E9PKH5_HUMAN Transcription factor p65 (Fragment) OS=Homo sapiens OX=9606 GN=RELA PE=1 SV=1;tr|A0A087X0W8|A0A087X0W8_HUMAN Transcription factor p65 OS=Homo sapiens OX=96	Q2TAM5;E9PKH5;A0A087X0W8;Q04206;E9PI38;E9PQS6;E9PKV4;A0A087WVP0	19.235	Q2TAM5	RELA	RELA protein	17.1502	17.6786	17.4607	17.1003	16.9135	16.9973	17.5028	17.3447	16.9247	16.7294	17.0972	17.3854	17.314	16.7168	17.0842	0.440701	0.201691	0.679711	17.16	3.96543	-1.3217	0.00148364	0.00960819	0.2916	0.0525899	0.53061	17.16	2.62382	-3.89147	0.0204025	0.0610055	-0.167607	-0.406617	0.0714032	17.16	-1.50813	-5.79951	0.154385	0.313498	-0.172549	-0.41156	0.0664608	17.16
3031	sp|P18085|ARF4_HUMAN ADP-ribosylation factor 4 OS=Homo sapiens OX=9606 GN=ARF4 PE=1 SV=3;tr|C9JPM4|C9JPM4_HUMAN ADP-ribosylation factor 4 (Fragment) OS=Homo sapiens OX=9606 GN=ARF4 PE=1 SV=1;tr|C9JAK5|C9JAK5_HUMAN ADP-ribosylation factor 4 OS=Homo sapiens	P18085;C9JPM4;C9JAK5;U3KQF2	25.398	P18085	ARF4	ADP-ribosylation factor 4	22.8989	23.4007	23.1308	22.7352	22.4481	22.7141	23.2015	22.9828	22.8344	22.2815	22.8227	23.1552	23.0484	22.6509	22.5673	0.440561	0.245346	0.635775	22.8582	4.85353	0.360031	0.000276958	0.00347754	0.242104	0.0468904	0.437319	22.8582	2.66719	-3.8115	0.0187618	0.057514	-0.0717162	-0.26693	0.123498	22.8582	-0.790076	-6.59229	0.443036	0.617823	-0.379591	-0.574806	-0.184377	22.8582
3556	tr|Q5SVL2|Q5SVL2_HUMAN Caspase-7 (Fragment) OS=Homo sapiens OX=9606 GN=CASP7 PE=1 SV=1;sp|P55210|CASP7_HUMAN Caspase-7 OS=Homo sapiens OX=9606 GN=CASP7 PE=1 SV=1;tr|A0A5F9ZHZ6|A0A5F9ZHZ6_HUMAN Caspase-7 OS=Homo sapiens OX=9606 GN=CASP7 PE=1 SV=1;tr|A0A0A0M	Q5SVL2;P55210;A0A5F9ZHZ6;A0A0A0MRL7	19.285	Q5SVL2	CASP7	Caspase-7 (Fragment)	18.5106	19.1607	18.8351	18.2777	17.3097	18.5037	18.8424	18.7475	17.8921	17.0735	18.5263	18.8588	18.5078	17.4544	17.5275	0.440484	0.0680139	0.812953	18.2685	2.54332	-4.03531	0.0238231	0.0600048	0.183287	-0.189182	0.555757	18.2685	1.05829	-6.26941	0.30835	0.429975	-0.638749	-1.01122	-0.266279	18.2685	-3.6881	-1.92556	0.00254347	0.0174857	-1.20993	-1.5824	-0.837458	18.2685
2918	sp|P11172|UMPS_HUMAN Uridine 5-monophosphate synthase OS=Homo sapiens OX=9606 GN=UMPS PE=1 SV=1;tr|E9PFD2|E9PFD2_HUMAN OMPdecase OS=Homo sapiens OX=9606 GN=UMPS PE=1 SV=1	P11172;E9PFD2	21.253	P11172	UMPS	Uridine 5-monophosphate synthase	20.3622	20.9372	20.6675	20.1355	19.4894	20.1832	20.6719	20.4693	19.913	19.3673	20.324	20.5816	20.4756	20.022	20.1092	0.440433	0.103634	0.777232	20.2473	2.81236	-3.53776	0.0141522	0.0412703	0.247676	-0.0891232	0.584475	20.2473	1.58152	-5.62297	0.136717	0.238391	-0.266308	-0.603108	0.0704912	20.2473	-1.7005	-5.52422	0.111768	0.253569	-0.6345	-0.971299	-0.2977	20.2473
4939	sp|Q8NCF5|NF2IP_HUMAN NFATC2-interacting protein OS=Homo sapiens OX=9606 GN=NFATC2IP PE=1 SV=1;tr|H3BSZ7|H3BSZ7_HUMAN NFATC2-interacting protein OS=Homo sapiens OX=9606 GN=NFATC2IP PE=1 SV=1	Q8NCF5;H3BSZ7	5.6667	Q8NCF5	NFATC2IP	NFATC2-interacting protein	17.7658	18.3026	18.1165	17.6818	17.4039	17.6819	18.1121	18.0948	17.4781	17.4411	17.6873	18.0402	17.9975	17.5698	17.8852	0.439952	0.196647	0.683258	17.8172	3.88881	-1.4695	0.00172097	0.0105546	0.35791	0.114605	0.601216	17.8172	3.16363	-2.8738	0.00711407	0.0294085	-0.135117	-0.378422	0.108189	17.8172	-1.19432	-6.19594	0.252758	0.43784	-0.134942	-0.378248	0.108363	17.8172
5711	sp|Q9H223|EHD4_HUMAN EH domain-containing protein 4 OS=Homo sapiens OX=9606 GN=EHD4 PE=1 SV=1	Q9H223	102.58	Q9H223	EHD4	EH domain-containing protein 4	22.3038	22.7842	22.5101	22.1465	22.0772	22.2677	22.7346	22.4642	22.0786	21.9235	22.3408	22.713	22.2192	21.5314	21.5476	0.439855	0.11074	0.768971	22.2428	2.87425	-3.42139	0.0125429	0.0377709	0.0937041	-0.235411	0.42282	22.2428	0.612313	-6.64409	0.550427	0.660983	-0.385258	-0.714374	-0.0561426	22.2428	-2.51748	-4.15663	0.025034	0.0885371	-0.454682	-0.783798	-0.125567	22.2428
1078	tr|B4DQI4|B4DQI4_HUMAN Protein ABHD14B OS=Homo sapiens OX=9606 GN=ABHD14B PE=1 SV=1;sp|Q96IU4|ABHEB_HUMAN Protein ABHD14B OS=Homo sapiens OX=9606 GN=ABHD14B PE=1 SV=1;tr|F8W9U3|F8W9U3_HUMAN Protein ABHD14B OS=Homo sapiens OX=9606 GN=ABHD14B PE=1 SV=1	B4DQI4;Q96IU4;F8W9U3	8.2512	B4DQI4	ABHD14B	Protein ABHD14B	17.5575	18.255	18.3537	17.759	17.2482	17.6197	18.0444	18.2584	17.9376	16.7623	17.6843	17.881	18.1018	17.5781	16.9294	0.439698	0.160085	0.71931	17.7314	3.3819	-2.45011	0.00463357	0.019678	0.617523	0.337911	0.897136	17.7314	4.74963	0.164474	0.000335504	0.00412182	0.137746	-0.141867	0.417358	17.7314	1.05946	-6.34354	0.307836	0.494995	-0.640476	-0.920088	-0.360863	17.7314
1760	tr|G3V1D3|G3V1D3_HUMAN Dipeptidyl peptidase 3 OS=Homo sapiens OX=9606 GN=DPP3 PE=1 SV=1;tr|G3V180|G3V180_HUMAN Dipeptidyl peptidase 3 OS=Homo sapiens OX=9606 GN=DPP3 PE=1 SV=1;sp|Q9NY33|DPP3_HUMAN Dipeptidyl peptidase 3 OS=Homo sapiens OX=9606 GN=DPP3 PE=1	G3V1D3;G3V180;Q9NY33	61.111	G3V1D3	DPP3	Dipeptidyl peptidase 3	21.2065	21.8387	21.6208	21.2012	20.3835	21.1515	21.5231	21.5401	20.9902	20.1721	21.1715	21.4861	21.4134	20.7858	20.641	0.439484	0.160728	0.718241	21.1417	3.39064	-2.43321	0.00455468	0.0194729	0.348273	0.0695163	0.627029	21.1417	2.68694	-3.77497	0.0180581	0.0559767	-0.184078	-0.462834	0.0946781	21.1417	-1.42017	-5.9176	0.178064	0.344546	-0.777615	-1.05637	-0.498859	21.1417
6393	sp|Q9Y2V7|COG6_HUMAN Conserved oligomeric Golgi complex subunit 6 OS=Homo sapiens OX=9606 GN=COG6 PE=1 SV=2	Q9Y2V7	14.755	Q9Y2V7	COG6	Conserved oligomeric Golgi complex subunit 6	19.37	19.8887	19.2908	18.803	18.0412	19.2097	19.6358	19.276	18.2514	17.6591	19.2132	19.5868	19.121	18.0973	17.8112	0.439468	0.10828	0.770656	18.8837	2.85375	-3.46	0.0130549	0.0388899	-0.0350403	-0.366228	0.296147	18.8837	-0.227539	-6.81293	0.823388	0.87829	-0.880386	-1.21157	-0.549198	18.8837	-5.71692	1.85831	5.94459e-05	0.00125342	-1.42713	-1.75832	-1.09595	18.8837
1934	tr|H3BND4|H3BND4_HUMAN Pyridoxal-dependent decarboxylase domain-containing protein 1 OS=Homo sapiens OX=9606 GN=PDXDC1 PE=1 SV=1;sp|Q6P996|PDXD1_HUMAN Pyridoxal-dependent decarboxylase domain-containing protein 1 OS=Homo sapiens OX=9606 GN=PDXDC1 PE=1 SV=2	H3BND4;Q6P996	50.883	H3BND4	PDXDC1	Pyridoxal-dependent decarboxylase domain-containing protein 1	19.959	20.4457	20.2872	20.001	19.6254	19.9353	20.4106	20.2335	19.7761	19.5922	19.9799	20.3362	20.1829	19.6505	19.6675	0.439412	0.270183	0.60864	20.0055	5.5842	1.67806	7.48148e-05	0.0015477	0.276467	0.107239	0.445696	20.0055	3.51344	-2.1989	0.00357954	0.0186097	-0.148861	-0.31809	0.0203675	20.0055	-1.89178	-5.22975	0.0799968	0.202175	-0.329681	-0.49891	-0.160453	20.0055
1619	tr|F5GXE4|F5GXE4_HUMAN Arginyl-tRNA--protein transferase 1 OS=Homo sapiens OX=9606 GN=ATE1 PE=1 SV=1;tr|F8WAC9|F8WAC9_HUMAN Arginyl-tRNA--protein transferase 1 OS=Homo sapiens OX=9606 GN=ATE1 PE=1 SV=1;sp|O95260|ATE1_HUMAN Arginyl-tRNA--protein transferase	F5GXE4;F8WAC9;O95260	8.753	F5GXE4	ATE1	Arginyl-tRNA--protein transferase 1	16.8891	17.4934	17.3243	16.8894	16.2579	16.9288	17.2993	17.1674	16.8292	16.1279	16.9307	17.2737	17.2141	16.6662	16.7009	0.439291	0.179481	0.6991	16.9328	3.6363	-1.95787	0.00281431	0.0144834	0.319102	0.0592922	0.578911	16.9328	2.64142	-3.85908	0.0197208	0.0596494	-0.121272	-0.381081	0.138538	16.9328	-1.00385	-6.40007	0.332972	0.52132	-0.55397	-0.81378	-0.294161	16.9328
998	sp|A8MPP1|D11L8_HUMAN Putative ATP-dependent RNA helicase DDX11-like protein 8 OS=Homo sapiens OX=9606 GN=DDX11L8 PE=1 SV=1;sp|Q92771|DDX12_HUMAN Putative ATP-dependent RNA helicase DDX12 OS=Homo sapiens OX=9606 GN=DDX12P PE=5 SV=3;sp|Q96FC9|DDX11_HUMAN AT	A8MPP1;Q92771;Q96FC9;F5GYY1;F5GXL6;F5GXJ8;F6WZM0;F5H235;B4DMS8	4.8021	A8MPP1	DDX11L8	Putative ATP-dependent RNA helicase DDX11-like protein 8	15.5128	16.0108	15.8916	15.5622	15.3054	15.5268	15.9623	15.7751	15.4002	15.222	15.5108	15.8952	15.8011	15.4819	15.5286	0.439266	0.27059	0.607941	15.6258	5.60065	1.70691	7.27029e-05	0.00152246	0.305837	0.137161	0.474512	15.6258	3.89943	-1.45207	0.0016859	0.0112872	-0.035365	-0.20404	0.13331	15.6258	-0.450905	-6.80938	0.65916	0.78891	-0.164794	-0.33347	0.00388096	15.6258
6083	sp|Q9NZL9|MAT2B_HUMAN Methionine adenosyltransferase 2 subunit beta OS=Homo sapiens OX=9606 GN=MAT2B PE=1 SV=1;tr|H7C0X7|H7C0X7_HUMAN Methionine adenosyltransferase 2 subunit beta (Fragment) OS=Homo sapiens OX=9606 GN=MAT2B PE=1 SV=1	Q9NZL9;H7C0X7	34.334	Q9NZL9	MAT2B	Methionine adenosyltransferase 2 subunit beta	20.663	21.2414	21.1217	20.6505	19.8804	20.6917	21.0753	21.0568	20.376	19.735	20.7064	21.0613	21.0682	20.647	20.6093	0.438985	0.0828346	0.795136	20.7056	2.65081	-3.83833	0.0193659	0.0515613	0.395227	0.0390758	0.751377	20.7056	2.38658	-4.3208	0.0321326	0.0840544	-0.129169	-0.48532	0.226982	20.7056	-0.779987	-6.60034	0.448754	0.623613	-0.612155	-0.968306	-0.256005	20.7056
3271	sp|P36871|PGM1_HUMAN Phosphoglucomutase-1 OS=Homo sapiens OX=9606 GN=PGM1 PE=1 SV=3;tr|A0A3B3ITK7|A0A3B3ITK7_HUMAN Phosphoglucomutase-1 OS=Homo sapiens OX=9606 GN=PGM1 PE=1 SV=1	P36871;A0A3B3ITK7	26.294	P36871	PGM1	Phosphoglucomutase-1	20.0824	20.7088	20.7215	20.2861	19.672	20.1182	20.4763	20.7088	20.1942	19.4624	20.1654	20.4978	20.5076	20.0352	19.3662	0.438944	0.229164	0.648724	20.2002	4.49995	-0.300948	0.000534746	0.00508089	0.523966	0.314186	0.733746	20.2002	5.37159	1.29932	0.000108687	0.00205955	0.0498481	-0.159932	0.259628	20.2002	0.511032	-6.77916	0.61752	0.759492	-0.621774	-0.831554	-0.411994	20.2002
2378	sp|O15541|R113A_HUMAN E3 ubiquitin-protein ligase RNF113A OS=Homo sapiens OX=9606 GN=RNF113A PE=1 SV=1	O15541	3.1482	O15541	RNF113A	E3 ubiquitin-protein ligase RNF113A	15.4117	16.003	15.6775	15.3632	15.2352	15.4357	15.777	15.7882	15.0633	15.2323	15.5247	15.9059	15.7414	15.243	15.5545	0.437952	0.224599	0.651305	15.5304	4.4146	-0.462424	0.000628165	0.00568977	0.278322	0.0649686	0.491675	15.5304	2.8055	-3.554	0.0143426	0.0480881	-0.234189	-0.447543	-0.0208364	15.5304	-2.36065	-4.43835	0.03375	0.110304	-0.116713	-0.330066	0.0966399	15.5304
4049	sp|Q14232|EI2BA_HUMAN Translation initiation factor eIF-2B subunit alpha OS=Homo sapiens OX=9606 GN=EIF2B1 PE=1 SV=1;tr|H0YGG4|H0YGG4_HUMAN Translation initiation factor eIF-2B subunit alpha (Fragment) OS=Homo sapiens OX=9606 GN=EIF2B1 PE=1 SV=1;tr|F5H0D0|	Q14232;H0YGG4;F5H0D0	30.402	Q14232	EIF2B1	Translation initiation factor eIF-2B subunit alpha	20.0507	20.5237	20.6497	20.1421	19.7734	20.1154	20.5768	20.4593	20.2135	19.5266	20.0461	20.4227	20.4189	19.9966	19.9262	0.43698	0.224524	0.649436	20.1894	4.42338	-0.445769	0.000617815	0.00563316	0.438547	0.226091	0.651004	20.1894	4.43925	-0.418576	0.000599573	0.00594328	0.0466422	-0.165814	0.259099	20.1894	0.472141	-6.79912	0.644308	0.778578	-0.328711	-0.541167	-0.116254	20.1894
5375	sp|Q96P48|ARAP1_HUMAN Arf-GAP with Rho-GAP domain, ANK repeat and PH domain-containing protein 1 OS=Homo sapiens OX=9606 GN=ARAP1 PE=1 SV=3;tr|A0A0A0MSJ2|A0A0A0MSJ2_HUMAN Arf-GAP with Rho-GAP domain, ANK repeat and PH domain-containing protein 1 OS=Homo sa	Q96P48;A0A0A0MSJ2;E7EU13	12.67	Q96P48	ARAP1	Arf-GAP with Rho-GAP domain, ANK repeat and PH domain-containing protein 1	16.3748	16.851	16.8808	16.5717	16.2131	16.218	16.7527	16.8287	16.4811	16.0979	16.3186	16.6181	16.717	16.3182	16.5442	0.436811	0.20257	0.671052	16.5191	4.01046	-1.23498	0.00136004	0.00908502	0.505046	0.270805	0.739287	16.5191	4.63693	-0.0460777	0.000413697	0.0046952	0.153217	-0.0810241	0.387458	16.5191	1.40672	-5.93521	0.181939	0.350235	-0.018741	-0.252982	0.2155	16.5191
2026	tr|H9KV81|H9KV81_HUMAN Tetratricopeptide repeat protein 5 OS=Homo sapiens OX=9606 GN=TTC5 PE=1 SV=1;sp|Q8N0Z6|TTC5_HUMAN Tetratricopeptide repeat protein 5 OS=Homo sapiens OX=9606 GN=TTC5 PE=1 SV=2	H9KV81;Q8N0Z6	4.2431	H9KV81	TTC5	Tetratricopeptide repeat protein 5	15.6136	16.1478	16.032	15.5	15.428	15.5211	15.9452	15.862	15.5996	15.1326	15.5727	15.9221	15.886	15.4111	15.5673	0.435866	0.214522	0.65721	15.6761	4.23495	-0.804358	0.000883788	0.00693736	0.357523	0.136179	0.578867	15.6761	3.47375	-2.27571	0.00386924	0.0194439	-0.0655751	-0.286919	0.155769	15.6761	-0.637139	-6.70405	0.534608	0.696117	-0.193161	-0.414505	0.028183	15.6761
6155	sp|Q9UBS0|KS6B2_HUMAN Ribosomal protein S6 kinase beta-2 OS=Homo sapiens OX=9606 GN=RPS6KB2 PE=1 SV=2;tr|E9PIP7|E9PIP7_HUMAN Ribosomal protein S6 kinase beta-2 (Fragment) OS=Homo sapiens OX=9606 GN=RPS6KB2 PE=4 SV=2;sp|P23443|KS6B1_HUMAN Ribosomal protein	Q9UBS0;E9PIP7;P23443	4.7395	Q9UBS0	RPS6KB2	Ribosomal protein S6 kinase beta-2	14.4072	15.0913	15.0195	14.3863	14.38	14.4888	14.7987	14.8311	14.3402	14.334	14.5052	14.8186	14.6108	14.281	14.3829	0.435827	0.22426	0.647393	14.5784	4.43027	-0.432722	0.000609828	0.00558585	0.353401	0.141835	0.564968	14.5784	3.5924	-2.04603	0.00306667	0.0167887	-0.131245	-0.342811	0.0803213	14.5784	-1.33413	-6.028	0.20406	0.378841	-0.101394	-0.312961	0.110172	14.5784
181	tr|A0A087X2D8|A0A087X2D8_HUMAN C-Jun-amino-terminal kinase-interacting protein 4 OS=Homo sapiens OX=9606 GN=SPAG9 PE=1 SV=1;sp|O60271|JIP4_HUMAN C-Jun-amino-terminal kinase-interacting protein 4 OS=Homo sapiens OX=9606 GN=SPAG9 PE=1 SV=4	A0A087X2D8;O60271	64.866	A0A087X2D8	SPAG9	C-Jun-amino-terminal kinase-interacting protein 4	19.3232	19.8362	19.6501	19.4239	18.7786	19.2398	19.6917	19.6998	19.3107	18.6768	19.283	19.6252	19.6162	19.2097	19.0225	0.435697	0.242832	0.628562	19.3592	4.85842	0.369077	0.000274478	0.00346005	0.373385	0.18052	0.56625	19.3592	4.16358	-0.94386	0.00101308	0.00829086	0.0327911	-0.160074	0.225656	19.3592	0.36565	-6.84593	0.720248	0.830182	-0.456025	-0.648889	-0.26316	19.3592
5003	sp|Q8TB52|FBX30_HUMAN F-box only protein 30 OS=Homo sapiens OX=9606 GN=FBXO30 PE=1 SV=3	Q8TB52	4.5339	Q8TB52	FBXO30	F-box only protein 30	14.3196	14.8047	14.4658	14.0973	15.2361	14.3073	14.7273	14.5079	14.2044	14.0466	14.2696	14.6715	14.3504	13.9986	14.1166	0.435688	-0.0364192	0.907795	14.4082	1.98471	-5.00359	0.0677174	0.127654	0.142555	-0.329552	0.614662	14.4082	0.649389	-6.61998	0.526898	0.640955	-0.198734	-0.670841	0.273373	14.4082	-0.905304	-6.49372	0.381055	0.566153	0.167579	-0.304528	0.639686	14.4082
862	tr|A0A7I2YQ74|A0A7I2YQ74_HUMAN UTP--glucose-1-phosphate uridylyltransferase OS=Homo sapiens OX=9606 GN=UGP2 PE=1 SV=1;tr|E7EUC7|E7EUC7_HUMAN UTP--glucose-1-phosphate uridylyltransferase OS=Homo sapiens OX=9606 GN=UGP2 PE=1 SV=1;sp|Q16851|UGPA_HUMAN UTP--gl	A0A7I2YQ74;E7EUC7;Q16851;A0A087WYS1	36.863	A0A7I2YQ74	UGP2	UTP--glucose-1-phosphate uridylyltransferase	21.5102	22.1135	21.8875	21.5499	20.4531	21.483	21.8482	21.8547	21.2261	20.2054	21.5244	21.8623	21.7211	21.3571	21.0481	0.435484	0.0866634	0.784305	21.443	2.68493	-3.77528	0.0181285	0.0491717	0.315234	-0.0335867	0.664055	21.443	1.94354	-5.0738	0.0729286	0.150975	-0.128156	-0.476976	0.220665	21.443	-0.790129	-6.59225	0.443006	0.617823	-0.936983	-1.2858	-0.588162	21.443
818	tr|A0A7I2V2U8|A0A7I2V2U8_HUMAN Twinfilin-2 OS=Homo sapiens OX=9606 GN=TWF2 PE=1 SV=1;tr|A0A7I2V5D3|A0A7I2V5D3_HUMAN Twinfilin-2 OS=Homo sapiens OX=9606 GN=TWF2 PE=1 SV=1;sp|Q6IBS0|TWF2_HUMAN Twinfilin-2 OS=Homo sapiens OX=9606 GN=TWF2 PE=1 SV=2;tr|A0A7I2V5	A0A7I2V2U8;A0A7I2V5D3;Q6IBS0;A0A7I2V5B1;D6RG15;H0Y858	19.259	A0A7I2V2U8	TWF2	Twinfilin-2	17.5717	18.1999	17.9269	17.5213	17.0294	17.6593	17.9478	17.8263	17.6148	16.937	17.4456	17.8354	17.791	17.3715	17.1678	0.435464	0.218569	0.65236	17.5897	4.31783	-0.646278	0.000754679	0.00628834	0.289192	0.0722966	0.506087	17.5897	2.86747	-3.43753	0.01271	0.0442451	-0.0563475	-0.273243	0.160548	17.5897	-0.558711	-6.75261	0.585437	0.734218	-0.514143	-0.731039	-0.297248	17.5897
6486	sp|Q9Y5Y2|NUBP2_HUMAN Cytosolic Fe-S cluster assembly factor NUBP2 OS=Homo sapiens OX=9606 GN=NUBP2 PE=1 SV=1;tr|B7Z6P0|B7Z6P0_HUMAN Cytosolic Fe-S cluster assembly factor NUBP2 OS=Homo sapiens OX=9606 GN=NUBP2 PE=1 SV=1;tr|H3BQR2|H3BQR2_HUMAN Cytosolic Fe	Q9Y5Y2;B7Z6P0;H3BQR2	14.328	Q9Y5Y2	NUBP2	Cytosolic Fe-S cluster assembly factor NUBP2	16.0805	16.6571	16.5049	16.0406	15.4543	16.0776	16.4905	16.4316	16.014	15.3283	15.9866	16.3029	16.2163	15.7244	15.7854	0.435222	0.159979	0.710465	16.073	3.40062	-2.41394	0.00446635	0.0192162	0.336043	0.0608005	0.611286	16.073	2.62568	-3.88804	0.0203293	0.0609114	-0.121932	-0.397174	0.153311	16.073	-0.952715	-6.44972	0.357353	0.544367	-0.525572	-0.800815	-0.250329	16.073
819	sp|O14980|XPO1_HUMAN Exportin-1 OS=Homo sapiens OX=9606 GN=XPO1 PE=1 SV=1;tr|A0A7I2V2Y6|A0A7I2V2Y6_HUMAN Exportin-1 OS=Homo sapiens OX=9606 GN=XPO1 PE=1 SV=1;tr|A0A7I2V461|A0A7I2V461_HUMAN Exportin-1 OS=Homo sapiens OX=9606 GN=XPO1 PE=1 SV=1;tr|A0A7I2V2H0|	O14980;A0A7I2V2Y6;A0A7I2V461;A0A7I2V2H0;A0A7I2V2S3;A0A7I2V3P3;A0A7I2YQV4;A0A7I2V3W6;A0A7I2V3N0;A0A7I2YQX3;A0A7I2V4A3;A0A7I2V6B9;A0A7I2V488;C9JKM9	99.902	O14980	XPO1	Exportin-1	23.0577	23.5801	23.6018	23.2825	22.6847	23.2059	23.6165	23.4091	23.4229	22.5892	23.1904	23.5603	23.515	23.3146	23.0649	0.434316	0.211658	0.656975	23.273	4.19498	-0.88078	0.000953959	0.00723814	0.357306	0.134648	0.579965	23.273	3.45115	-2.31944	0.00404463	0.0199222	0.188657	-0.0340019	0.411315	23.273	1.8222	-5.33908	0.0904719	0.219579	-0.371753	-0.594412	-0.149095	23.273
5648	sp|Q9BZH6|WDR11_HUMAN WD repeat-containing protein 11 OS=Homo sapiens OX=9606 GN=WDR11 PE=1 SV=1	Q9BZH6	40.101	Q9BZH6	WDR11	WD repeat-containing protein 11	21.4248	21.8594	21.8006	21.4899	20.6088	21.3104	21.7645	21.8448	21.2133	20.1757	21.1813	21.5953	21.717	21.1924	20.7761	0.43423	0.145122	0.723339	21.3303	3.23015	-2.7427	0.00624262	0.0238969	0.481954	0.192846	0.771062	21.3303	3.58516	-2.06005	0.00311045	0.0169557	-0.00699463	-0.296103	0.282113	21.3303	-0.0520316	-6.91521	0.95926	0.980103	-0.785341	-1.07445	-0.496233	21.3303
4177	sp|Q15646|OASL_HUMAN 2-5-oligoadenylate synthase-like protein OS=Homo sapiens OX=9606 GN=OASL PE=1 SV=2;tr|A0A7P0T9H8|A0A7P0T9H8_HUMAN 2-5-oligoadenylate synthase-like protein OS=Homo sapiens OX=9606 GN=OASL PE=4 SV=1;tr|A0A7P0TB39|A0A7P0TB39_HUMAN 2-	Q15646;A0A7P0T9H8;A0A7P0TB39	31.992	Q15646	OASL	2-5-oligoadenylate synthase-like protein	18.3737	18.8123	18.2315	17.9468	16.1221	18.1097	18.5543	17.9809	17.0275	15.7578	18.2888	18.708	18.1765	17.3067	16.1775	0.434124	0.0356248	0.832623	17.7049	2.34288	-4.3947	0.0349031	0.0787361	-0.127763	-0.526262	0.270736	17.7049	-0.689512	-6.59239	0.502091	0.618424	-0.83041	-1.22891	-0.431911	17.7049	-4.48155	-0.397987	0.000553595	0.0058059	-2.23826	-2.63676	-1.83976	17.7049
13	sp|P46379|BAG6_HUMAN Large proline-rich protein BAG6 OS=Homo sapiens OX=9606 GN=BAG6 PE=1 SV=2;tr|A0A7I2V508|A0A7I2V508_HUMAN BCL2-associated athanogene 6 OS=Homo sapiens OX=9606 GN=BAG6 PE=1 SV=1;tr|A0A0G2JK23|A0A0G2JK23_HUMAN BCL2-associated athanogene 6	P46379;A0A7I2V508;A0A0G2JK23;A0A024RCR6;A0A7P0MQS5;A0A0G2JL47	65.566	P46379	BAG6	Large proline-rich protein BAG6	20.0338	20.5858	20.4518	20.2591	19.8921	20.0847	20.4615	20.4104	20.0601	19.8383	20.0996	20.4728	20.3765	20.0992	20.3876	0.434067	0.187603	0.680531	20.2342	3.78762	-1.66504	0.00209491	0.0119286	0.340227	0.0937626	0.586691	20.2342	2.96878	-3.24588	0.0104258	0.0383938	0.0667922	-0.179672	0.313256	20.2342	0.582821	-6.73832	0.569547	0.72189	-0.0333111	-0.279775	0.213153	20.2342
2226	sp|O00154|BACH_HUMAN Cytosolic acyl coenzyme A thioester hydrolase OS=Homo sapiens OX=9606 GN=ACOT7 PE=1 SV=3;tr|K7EKP8|K7EKP8_HUMAN Cytosolic acyl coenzyme A thioester hydrolase (Fragment) OS=Homo sapiens OX=9606 GN=ACOT7 PE=1 SV=8	O00154;K7EKP8	46.409	O00154	ACOT7	Cytosolic acyl coenzyme A thioester hydrolase	20.6284	21.2664	20.9889	20.4044	19.695	20.5061	20.8992	20.9342	20.1401	19.4817	20.6164	20.8874	20.8088	20.1904	19.9863	0.43404	0.158706	0.709375	20.4956	3.39025	-2.43397	0.00455816	0.0194747	0.326999	0.0516641	0.602333	20.4956	2.55416	-4.01901	0.0233323	0.067008	-0.338686	-0.614021	-0.0633513	20.4956	-2.64545	-3.92201	0.0195677	0.0743691	-0.862631	-1.13797	-0.587296	20.4956
6400	sp|Q9Y2Z0|SGT1_HUMAN Protein SGT1 homolog OS=Homo sapiens OX=9606 GN=SUGT1 PE=1 SV=3	Q9Y2Z0	41.412	Q9Y2Z0	SUGT1	Protein SGT1 homolog	19.6871	20.2701	20.0866	19.8785	19.3573	19.6629	20.0906	19.9671	19.8681	19.2618	19.7575	20.0487	19.9191	19.6817	19.7122	0.433947	0.204497	0.663397	19.8166	4.06734	-1.12556	0.00121879	0.00848882	0.288459	0.0590082	0.517909	19.8166	2.7037	-3.7439	0.017481	0.0546669	0.106951	-0.122499	0.336401	19.8166	1.00244	-6.40146	0.333625	0.52157	-0.258731	-0.488181	-0.0292807	19.8166
4752	sp|Q86WQ0|NR2CA_HUMAN Nuclear receptor 2C2-associated protein OS=Homo sapiens OX=9606 GN=NR2C2AP PE=1 SV=1	Q86WQ0	9.0173	Q86WQ0	NR2C2AP	Nuclear receptor 2C2-associated protein	15.5887	16.2078	16.2884	15.8242	15.4464	15.6798	16.0104	16.2057	15.6628	15.2036	15.6057	15.9578	15.8613	15.5338	15.6779	0.433933	0.15447	0.713397	15.7836	3.33934	-2.53229	0.00503746	0.0206627	0.493766	0.214302	0.773229	15.7836	3.79978	-1.64461	0.00204591	0.012721	0.0488744	-0.230589	0.328338	15.7836	0.376114	-6.84185	0.712632	0.824689	-0.182112	-0.461576	0.0973514	15.7836
3476	sp|P51580|TPMT_HUMAN Thiopurine S-methyltransferase OS=Homo sapiens OX=9606 GN=TPMT PE=1 SV=1	P51580	6.4121	P51580	TPMT	Thiopurine S-methyltransferase	18.537	19.1504	19.3361	18.8659	18.4803	18.6306	19.0028	19.1095	18.8383	18.2593	18.5717	18.8867	18.982	18.5277	18.6332	0.433519	0.175966	0.691072	18.7874	3.61997	-1.9895	0.00290566	0.014707	0.562759	0.305206	0.820312	18.7874	4.69915	0.0703337	0.000368442	0.00440193	0.164171	-0.0933821	0.421724	18.7874	1.37086	-5.98152	0.192608	0.364707	-0.122192	-0.379745	0.135361	18.7874
626	tr|A0A3B3ISX4|A0A3B3ISX4_HUMAN RecQ-mediated genome instability protein 2 OS=Homo sapiens OX=9606 GN=RMI2 PE=1 SV=1;sp|Q96E14|RMI2_HUMAN RecQ-mediated genome instability protein 2 OS=Homo sapiens OX=9606 GN=RMI2 PE=1 SV=2	A0A3B3ISX4;Q96E14	4.2269	A0A3B3ISX4	RMI2	RecQ-mediated genome instability protein 2	13.1997	13.8107	13.4054	13.0417	12.9512	13.0803	13.412	13.5889	13.2885	13.4364	13.1851	13.543	13.3251	13.3481	13.3521	0.433511	0.146844	0.720178	13.3312	3.25226	-2.70015	0.00597728	0.0232519	0.284765	-0.00190233	0.571432	13.3312	2.13634	-4.75531	0.0513356	0.117152	0.0711013	-0.215566	0.357768	13.3312	0.533412	-6.76698	0.602353	0.747579	0.0915207	-0.195146	0.378188	13.3312
3216	sp|P31946|1433B_HUMAN 14-3-3 protein beta/alpha OS=Homo sapiens OX=9606 GN=YWHAB PE=1 SV=3	P31946	47.599	P31946	YWHAB	14-3-3 protein beta/alpha	23.0336	23.5369	23.4297	22.9046	22.3578	22.9235	23.4099	23.3639	22.8236	22.2134	23.0313	23.3382	23.2538	22.8074	22.7513	0.432171	0.193107	0.671236	23.0119	3.8878	-1.47146	0.00172436	0.0105652	0.35296	0.113896	0.592025	23.0119	3.17522	-2.85155	0.00695394	0.0289573	-0.150945	-0.390009	0.0881198	23.0119	-1.35789	-5.99804	0.19659	0.369519	-0.555309	-0.794374	-0.316245	23.0119
1548	tr|H0YDR3|H0YDR3_HUMAN Tetratricopeptide repeat protein 9C (Fragment) OS=Homo sapiens OX=9606 GN=TTC9C PE=1 SV=1;tr|E9PKV8|E9PKV8_HUMAN Tetratricopeptide repeat protein 9C (Fragment) OS=Homo sapiens OX=9606 GN=TTC9C PE=1 SV=1;sp|Q8N5M4|TTC9C_HUMAN Tetratri	H0YDR3;E9PKV8;Q8N5M4	10.762	H0YDR3	TTC9C	Tetratricopeptide repeat protein 9C (Fragment)	16.3663	16.6387	16.539	16.1877	15.6807	16.1665	16.499	16.342	16.1071	15.5293	15.9976	16.6876	16.3185	16.1634	16.0103	0.431642	0.175823	0.687461	16.2156	3.62873	-1.97253	0.0028563	0.0145699	0.223018	-0.0328012	0.478836	16.2156	1.87486	-5.18324	0.0824375	0.164308	-0.0240718	-0.279891	0.231747	16.2156	-0.202367	-6.89492	0.842625	0.910567	-0.436699	-0.692518	-0.18088	16.2156
1837	tr|Q68DL0|Q68DL0_HUMAN Phosphatidylinositol 4,5-bisphosphate 3-kinase catalytic subunit beta isoform OS=Homo sapiens OX=9606 GN=PIK3CB PE=1 SV=1;tr|H0Y871|H0Y871_HUMAN Phosphatidylinositol 3-kinase catalytic subunit type 3 (Fragment) OS=Homo sapiens OX=960	Q68DL0;H0Y871;P42338;Q5SR50;F8W9P4;O00329	4.1723	Q68DL0	PIK3CB	Phosphatidylinositol 4,5-bisphosphate 3-kinase catalytic subunit beta isoform	15.2502	15.8532	15.8255	15.3886	14.576	15.134	15.5748	15.7092	15.2862	14.597	15.2784	15.5291	15.6865	15.3156	15.1635	0.431448	0.145847	0.71705	15.3445	3.24886	-2.70669	0.00601728	0.0233147	0.519512	0.23391	0.805113	15.3445	3.91199	-1.42781	0.00164534	0.0110781	0.109261	-0.17634	0.394863	15.3445	0.822753	-6.56556	0.424833	0.60395	-0.442024	-0.727625	-0.156423	15.3445
1366	tr|D6REX3|D6REX3_HUMAN Protein transport protein Sec31A OS=Homo sapiens OX=9606 GN=SEC31A PE=1 SV=1;sp|O94979|SC31A_HUMAN Protein transport protein Sec31A OS=Homo sapiens OX=9606 GN=SEC31A PE=1 SV=3;tr|H7BXG7|H7BXG7_HUMAN Protein transport protein Sec31A O	D6REX3;O94979;H7BXG7;D6RHZ5	37.151	D6REX3	SEC31A	Protein transport protein Sec31A	19.724	20.1921	20.061	19.8905	19.3213	19.7659	20.2008	20.0356	19.8553	19.256	19.7647	20.1521	20.0703	19.7219	19.4967	0.430121	0.2813	0.578942	19.8339	6.21568	2.75805	2.56038e-05	0.00089545	0.304097	0.155276	0.452918	19.8339	4.39451	-0.503402	0.000652502	0.00622861	0.0710396	-0.0777817	0.219861	19.8339	1.02659	-6.37726	0.322517	0.509882	-0.39353	-0.542351	-0.244709	19.8339
1911	tr|H0YNH5|H0YNH5_HUMAN ATP-binding domain-containing protein 4 (Fragment) OS=Homo sapiens OX=9606 GN=DPH6 PE=1 SV=1;sp|Q7L8W6|DPH6_HUMAN Diphthine--ammonia ligase OS=Homo sapiens OX=9606 GN=DPH6 PE=1 SV=3;tr|H0YND7|H0YND7_HUMAN ATP-binding domain-containin	H0YNH5;Q7L8W6;H0YND7	5.0546	H0YNH5	DPH6	ATP-binding domain-containing protein 4 (Fragment)	16.9656	17.5793	17.542	17.1781	17.0745	16.812	17.2181	17.3108	17.2568	16.9942	16.9008	17.1703	14.9917	16.9603	17.2857	0.429763	-0.549383	1.40891	17.016	0.94394	-6.37878	0.36166	0.461759	-0.277979	-1.25712	0.701166	17.016	-0.61056	-6.6452	0.551554	0.661719	0.238948	-0.740197	1.21809	17.016	0.52483	-6.77171	0.608147	0.752032	0.225317	-0.753828	1.20446	17.016
3610	sp|P61088|UBE2N_HUMAN Ubiquitin-conjugating enzyme E2 N OS=Homo sapiens OX=9606 GN=UBE2N PE=1 SV=1;tr|F8VSD4|F8VSD4_HUMAN Ubiquitin-conjugating enzyme E2 N OS=Homo sapiens OX=9606 GN=UBE2N PE=1 SV=1;tr|F8VV71|F8VV71_HUMAN Ubiquitin-conjugating enzyme E2 N	P61088;F8VSD4;F8VV71;F8VQQ8;Q5JXB2	22.669	P61088	UBE2N	Ubiquitin-conjugating enzyme E2 N	22.6472	23.3059	23.1728	22.607	21.8345	22.6715	23.012	23.036	22.3801	21.5855	22.6659	22.9558	22.9123	22.4147	22.5338	0.429682	0.0411825	0.818182	22.649	2.37859	-4.33151	0.0326227	0.0751362	0.378883	-0.00961716	0.767383	22.649	2.09738	-4.82093	0.0551532	0.123257	-0.194222	-0.582722	0.194278	22.649	-1.07515	-6.32712	0.301002	0.488496	-0.676934	-1.06543	-0.288434	22.649
3917	sp|Q13057|COASY_HUMAN Bifunctional coenzyme A synthase OS=Homo sapiens OX=9606 GN=COASY PE=1 SV=4	Q13057	25.316	Q13057	COASY	Bifunctional coenzyme A synthase	17.5802	18.1535	18.0785	17.7673	17.2931	17.3763	17.8091	17.8671	17.5913	17.236	17.397	17.6773	17.892	17.7562	17.7501	0.42882	0.128224	0.729417	17.6817	3.06799	-3.05361	0.00858327	0.0295038	0.494699	0.194103	0.795296	17.6817	3.53932	-2.1488	0.00340254	0.0179724	0.25377	-0.0468266	0.554367	17.6817	1.8156	-5.34932	0.0915271	0.221029	-0.0247599	-0.325357	0.275837	17.6817
1392	tr|E5RGQ3|E5RGQ3_HUMAN RWD domain-containing protein 1 (Fragment) OS=Homo sapiens OX=9606 GN=RWDD1 PE=1 SV=1;sp|Q9H446|RWDD1_HUMAN RWD domain-containing protein 1 OS=Homo sapiens OX=9606 GN=RWDD1 PE=1 SV=1	E5RGQ3;Q9H446	6.4951	E5RGQ3	RWDD1	RWD domain-containing protein 1 (Fragment)	18.9744	19.5406	19.5245	19.074	18.2096	18.9898	19.3765	19.3282	19.0713	18.0591	19.0455	19.379	19.227	18.8456	18.6922	0.428791	0.140338	0.717244	19.0225	3.19694	-2.80656	0.00666352	0.024997	0.356675	0.0682221	0.645127	19.0225	2.65926	-3.82616	0.0190521	0.0581821	-0.00625524	-0.294708	0.282197	19.0225	-0.0466372	-6.9155	0.96348	0.982106	-0.682915	-0.971368	-0.394463	19.0225
5911	sp|Q9NQT8|KI13B_HUMAN Kinesin-like protein KIF13B OS=Homo sapiens OX=9606 GN=KIF13B PE=1 SV=2;tr|E7ERX9|E7ERX9_HUMAN Kinesin-like protein OS=Homo sapiens OX=9606 GN=KIF13B PE=1 SV=1	Q9NQT8;E7ERX9	8.6483	Q9NQT8	KIF13B	Kinesin-like protein KIF13B	16.3211	16.9185	16.8509	16.5226	15.8673	16.5045	16.8506	16.7678	16.3001	15.4896	16.3404	16.6827	16.5699	16.1843	16.0314	0.428624	0.14591	0.711338	16.4135	3.26056	-2.68418	0.00588063	0.0230518	0.340869	0.0581547	0.623583	16.4135	2.593	-3.94804	0.021652	0.0636758	-0.0529605	-0.335674	0.229753	16.4135	-0.402873	-6.83089	0.6933	0.810718	-0.592518	-0.875232	-0.309804	16.4135
1850	tr|H0YA80|H0YA80_HUMAN Ubiquitin-conjugating enzyme E2 B (Fragment) OS=Homo sapiens OX=9606 GN=UBE2B PE=1 SV=1;tr|H0Y9V2|H0Y9V2_HUMAN Ubiquitin-conjugating enzyme E2 B (Fragment) OS=Homo sapiens OX=9606 GN=UBE2B PE=1 SV=1;sp|P63146|UBE2B_HUMAN Ubiquitin-co	H0YA80;H0Y9V2;P63146	4.5833	H0YA80	UBE2B	Ubiquitin-conjugating enzyme E2 B (Fragment)	13.4828	14.1196	13.9983	13.5965	12.8317	13.4594	13.8138	13.8291	13.4106	12.7636	13.4927	13.7862	13.9214	13.3081	13.2731	0.428199	0.156007	0.700391	13.5391	3.38324	-2.44752	0.00462136	0.0196415	0.437965	0.165773	0.710157	13.5391	3.4604	-2.30154	0.00397188	0.0197262	-0.0399017	-0.312094	0.232291	13.5391	-0.315267	-6.86401	0.757342	0.855285	-0.522154	-0.794346	-0.249961	13.5391
5611	sp|Q9BXB4|OSB11_HUMAN Oxysterol-binding protein-related protein 11 OS=Homo sapiens OX=9606 GN=OSBPL11 PE=1 SV=2	Q9BXB4	29.864	Q9BXB4	OSBPL11	Oxysterol-binding protein-related protein 11	18.5862	19.0681	18.8924	18.6194	17.859	18.5879	18.9464	18.8466	18.4743	17.9102	18.4995	18.9423	18.8315	18.5994	18.426	0.427766	0.178483	0.677048	18.6059	3.69043	-1.85308	0.00253191	0.0135446	0.299001	0.0497183	0.548283	18.6059	2.57955	-3.97266	0.0222204	0.0647788	0.00651635	-0.242766	0.255799	18.6059	0.056218	-6.91497	0.955985	0.977953	-0.492747	-0.74203	-0.243464	18.6059
6328	sp|Q9UPQ9|TNR6B_HUMAN Trinucleotide repeat-containing gene 6B protein OS=Homo sapiens OX=9606 GN=TNRC6B PE=1 SV=4;tr|H0Y720|H0Y720_HUMAN Trinucleotide repeat-containing gene 6B protein (Fragment) OS=Homo sapiens OX=9606 GN=TNRC6B PE=1 SV=1	Q9UPQ9;H0Y720	27.791	Q9UPQ9	TNRC6B	Trinucleotide repeat-containing gene 6B protein	17.1707	17.7999	17.6337	17.7515	17.256	17.4614	17.6265	17.7005	17.6234	17.5979	17.2883	17.7768	17.6039	17.6447	17.6192	0.427601	0.211707	0.643495	17.5703	4.25953	-0.757412	0.000843283	0.00676564	0.339239	0.123346	0.555133	17.5703	3.37932	-2.45831	0.00465708	0.0221116	0.366406	0.150513	0.5823	17.5703	3.64994	-1.99966	0.00274026	0.0185186	0.184226	-0.031668	0.400119	17.5703
127	tr|H3BS73|H3BS73_HUMAN Methyltransferase-like 26 OS=Homo sapiens OX=9606 GN=METTL26 PE=1 SV=1;tr|H3BRT2|H3BRT2_HUMAN Methyltransferase-like 26 (Fragment) OS=Homo sapiens OX=9606 GN=METTL26 PE=1 SV=1;tr|H3BQ55|H3BQ55_HUMAN Methyltransferase-like 26 (Fragmen	H3BS73;H3BRT2;H3BQ55;H3BNT3;H3BNB2;H3BMF3;A0A087WYU2;Q96S19	3.6548	H3BS73	METTL26	Methyltransferase-like 26	14.2329	14.9365	15.0462	14.5995	14.2267	14.3812	14.6703	14.9563	14.6144	14.3782	14.3186	14.6079	14.8642	14.4486	14.5683	0.427374	0.208317	0.646432	14.59	4.19578	-0.879247	0.000952498	0.00723814	0.644691	0.425633	0.863748	14.59	6.3293	2.94429	2.12356e-05	0.000693368	0.243268	0.0242107	0.462326	14.59	2.38831	-4.38919	0.0320273	0.106196	0.0802156	-0.138842	0.299273	14.59
3311	sp|P41226|UBA7_HUMAN Ubiquitin-like modifier-activating enzyme 7 OS=Homo sapiens OX=9606 GN=UBA7 PE=1 SV=2	P41226	15.176	P41226	UBA7	Ubiquitin-like modifier-activating enzyme 7	17.1506	17.7618	17.5811	17.002	16.2853	17.1443	17.4529	17.5788	16.8122	16.1694	17.1293	17.4915	17.4266	16.3977	16.1556	0.427363	0.157452	0.697274	17.036	3.40518	-2.40513	0.00442656	0.0191297	0.387453	0.117542	0.657364	17.036	3.08718	-3.02025	0.00826613	0.0325281	-0.404092	-0.674003	-0.134181	17.036	-3.21976	-2.8335	0.00637143	0.0334934	-0.937949	-1.20786	-0.668038	17.036
1933	tr|H3BTF6|H3BTF6_HUMAN Tubulin epsilon and delta complex protein 2 (Fragment) OS=Homo sapiens OX=9606 GN=TEDC2 PE=1 SV=1;tr|H3BND0|H3BND0_HUMAN Tubulin epsilon and delta complex protein 2 OS=Homo sapiens OX=9606 GN=TEDC2 PE=1 SV=1;sp|Q7L2K0|TEDC2_HUMAN Tub	H3BTF6;H3BND0;Q7L2K0	2.9939	H3BTF6	TEDC2	Tubulin epsilon and delta complex protein 2 (Fragment)	13.9877	14.5781	14.4827	14.43	14.461	14.0896	14.3047	14.5159	14.2146	14.8162	14.0669	14.5428	14.3328	14.3722	14.4218	0.427156	0.19588	0.658432	14.3745	3.97209	-1.30888	0.00146467	0.00954361	0.39575	0.164474	0.627027	14.3745	3.68005	-1.87631	0.00258375	0.0149047	0.290878	0.0596017	0.522154	14.3745	2.70485	-3.81186	0.017442	0.0692244	0.518295	0.287019	0.749571	14.3745
5346	sp|Q96KP4|CNDP2_HUMAN Cytosolic non-specific dipeptidase OS=Homo sapiens OX=9606 GN=CNDP2 PE=1 SV=2;tr|J3QKT2|J3QKT2_HUMAN Cytosolic non-specific dipeptidase (Fragment) OS=Homo sapiens OX=9606 GN=CNDP2 PE=1 SV=1;tr|J3KSV5|J3KSV5_HUMAN Cytosolic non-specifi	Q96KP4;J3QKT2;J3KSV5;A0A087WYZ1;J3QQN6;J3QR27;J3QLU1;J3QKQ0;J3QRD0;J3QL02	54.849	Q96KP4	CNDP2	Cytosolic non-specific dipeptidase	19.7124	20.3654	20.2754	19.827	19.2574	19.6529	20.017	20.1929	19.7123	19.0499	19.7167	19.9807	20.017	19.5062	19.5524	0.427009	0.143087	0.710932	19.789	3.23445	-2.73443	0.00619009	0.023796	0.467735	0.183813	0.751658	19.789	3.54294	-2.1418	0.00337852	0.017886	-0.0122169	-0.296139	0.271705	19.789	-0.0925387	-6.9121	0.927619	0.96286	-0.407479	-0.691401	-0.123557	19.789
3057	sp|P20290|BTF3_HUMAN Transcription factor BTF3 OS=Homo sapiens OX=9606 GN=BTF3 PE=1 SV=1	P20290	25.897	P20290	BTF3	Transcription factor BTF3	21.2679	21.847	21.6383	21.3098	20.8446	21.2875	21.6378	21.6669	21.082	20.7386	21.27	21.6204	21.493	21.0879	21.1935	0.426608	0.191368	0.661849	21.3324	3.90014	-1.44764	0.00168358	0.0103853	0.324271	0.0890304	0.559512	21.3324	2.96455	-3.2539	0.0105125	0.038645	-0.115205	-0.350446	0.120036	21.3324	-1.05323	-6.35001	0.310582	0.497901	-0.349544	-0.584785	-0.114304	21.3324
[truncated: 5,747 more rows]
[truncated: 4 more columns]
